# Supplementary material for: Effector Polymorphisms of the Sunflower Downy Mildew Pathogen Plasmopara halstedii and Their Use to Identify Pathotypes from Field Isolates
Source: PubMed Central journal article supplement (PMC4742249; doi:10.1371/journal.pone.0148513), 2016-02-04
Supplement: pone.0148513.s002.pdf [file pone.0148513.s002.pdf]

>PhCRN01\_100 PLHAL100A12922

GGGGTTCAGCAGAACGGAAGTGTGTGACATGATACGGGACGGACGAGGCATTCGGAAGTTCAACGAACCACTTGGGGATTCCGAGTTG  
GAATATGAAGGTGGAGTTCCTGCAACATTCAAGACGTTGCGAAAAGCCACTGTGGCCGCAATTTGCAAGTCTTCTCGATCGCATAACCA  
GTGATATTCATCCGCGCTCCCCCTTTGTCCGGAAAGACGGCCTTGTGCGATCTACTCTACGACCACATTTGTTTCGCTCCAAGCCTGAT  
GCACTTGTTCCTCCGCAATCTGGCCAATCAAATGCCTGTAGATGGCAAGTTTACCAGATTTTTTCAAATTTTTGTACGGCTATGAGTTT  
GAAGCATTCTGCGCACACAAAGGCGATCGGGTGGTACTGATTGATGGAGCTCAATTTACGTATAACGACGAGCAGCTGTGGAGGGGA  
TACGTGAAAGGCGCATTGGAATCGCAAATACGAGGCCTTCGCTTCGTTCTCTTTTTCATCGTATGGCAGCTTTAATATTTACCAGCAA  
TTTGAACGCGCTGGAACCTCCGATCCTTGTGCCTCCTCAGAATACTTTTGGATTGAATGCCACACCATAACAAGCCTGGCCTGCAGCTT  
TCACGTGAGGAGCTGAAAGAAATGGCTCAAAACAGCATTGGCATATCAGCCTCCGATCTCATTTGGATCTTGTGCTCGGGTCATATC  
GGAATTGCTCGAGCTATCCTCATCTTTTTGCATCGTAAGTTTGGTTCTTGAAAGCCAAACGATGAAGATGTTGAGCTGGAACCTCCG  
TCCTTGGGGCTGCTGCAAGAAATTCGCTCCAGTTATCGGGGTATCCCAAGTGTGATGCTTCTGGCAAGTTTATGCTTGTATCAGATGGACATCGA  
CTGCCGGATGAAGCAGTGTGAAGATGATTGGAATCTTGAATGGTGTGCTTCTGGCAAGTTTATGCTTGTATCAGATGGACATCGA  
ACTCCTAGAAGCCAGTTTGTGCGGAATTGTTGACAAGGTACGGGTCTTGTACGAGGATCAGGCGGGCAGCTTCAGTTCGCTTCA  
AGCATGCACCTCAAGATCTGGCTGTATTCAAATCGAACAGATCCAATTTTCGTACATGGTATCAGACGTGCGCACACGAAGACTTTGTT  
GTCGCGTGCCTACAGCGAATGAGTGTCTTTCGACTGCAGAACTTCGCGAACGAAAAACCAACGGCATTGCTCGAGAACGCCAAATA  
CAGATGGAGCTATACGGCGCCACAGTATCATGCTTGCCTCGAGATGTGTTGGTTACCCCTGAATGGCGAACGACTGATGGCAAAGGA  
TACATTGATTTAATGATTTCGTGGCTCGAGCATTCTTTGGTTTTGGGAGTTGTTAGTGAATGGTGACGATGCTGTGCGGCCACTCAAAT  
CGATTTGAAACTGGGGGAAGTACCATGGAAGCTTAACTGGAAGTTCTAAGTATGTGCTCATCGATTTTCGTCAGAGTAAGGGCGTT  
CGGCACCAGAAGCATGGGTTTTCTGTATGTGTCGTTTGTGGATTCTTACACCAAAGCGCTGGTTTTTCAGCACTGGTAAGTCCGTTGTA  
AGCGTCAAACCTGCTAAGCTAATTAAGTGTTCATGTTAATACATAAGGTTTT

>PhCRN01\_334 PLHAL3342991

GAACGGAAGTGTGTGACATGATACGGGACGGACGAGGCATTCGGAAGTTCAACGAACCACTTGGGGATTCCGAGTTGGAATATGAAG  
GTGGAGTTCCTGCAACATTCAAGACGTTGCGAAAAGCCACTGTGGCCGCAATTTGCAAGTCTTCTCGATCGCATAACAGTGATATTC  
TCCGCGCTCCCCCTTTGTCCGGAAAGACGGCCTTGTGCGATCTACTCTACGACCACATTTGTTTCGCTCCAAGCCTGATGCACTTGT  
CCCGCATTCTGGCCAATCAAATGCCTGTAGATGGCAAGTTTACCAGATTTTTTCAAATTTTTGTACGGCTATGAGTTTGAAGCATTCT  
GCGCACACAAAGGCGATCGGGTGGTACTGATTGATGAAGCTCAAATTTACGTATAACGACGAGCAGCTGTGGAGGGGATACGTGAAAG  
GCGCATTGGAATCGCAAATACGAGGCCTTCGCTTCGTTCTCTTTTTCATCGTATGGCAGCTTTAATATTTACCAGCAAATTTGAACGCG  
CTGGAACCTCCGATCCTTGTGCTCCTCAGAATACTTTTGGATTGAATGCCACACCATAACAAGCCTGGCCTGCAGCTTTACAGTGAAG  
AGCTGAAAGAAATGGCTCAAAACAGCATTGGCATATCAGCCTCCGATCTCATTTGGATCTTGTGCTCGGGTCATATCGGAATTTGCTC  
GAGCTATCCTCATCTTTTTGCATCGTAAGTTTGGTTCTTGAAAGCCAAACGATGAAGATGTTGAGCTGGAACCTTCGCTCCTTGGGGC  
TGCTGCAAGAAATTCGCTCCAGTTATCGGGGTATCCCAAGTGTGATGCTTTCGAGCGAGTGAAAGATGCTAATAACCTGCCGGATG  
AAGCAGTGTGAAGATGATTGGAATCTTGAATGGTGTGCTTCTGGCAAGTTTATGCTTGTATCAGATGGACATCGAATCCTAGAA  
GCCAGTTTGTGCGGAATTGTTGACAAGGTACGGGTCTTGTACGAGGATCAGGCGGGCAGCTTCAGTTCGCTTCAAGCATGCACC  
TCAAGATCTGGCTGTATTCAAATCGAACAGATCCAATTTTCGTACATGGTATCAGACGTGCGCACACGAAGACTTTGTTGTGCGGTGCG  
TACAGCGAATGAGTGTCTTTCGACTGCAGAACTTCGCGAACGAAAAACCAACGGCATTGCTCGAGAACGCCAAATACAGATGGAGC  
TATACGGCGCCACAGTATCATGCTTGCCTCGAGATGTGTTGGTTACCCCTGAATGGCGAACGACTGATGGCAAAGGATACATTGATT  
TAATGATTTCGTGGCTCGAGCATTCTTTGGTTTTGGGAGTTGTTAGTGAATGGTGACGATGCTGTGCGGCCACTCAAATCGATTTGAAA  
CTGGGGGAAGTACCATGGAAGCTTAACTGGAAGTTCTAAGTATGTGCTCATCGATTTTCGTCAGAGTAAGGGCGTTCCGGCACCAGA  
AGCATGGGTTTTCTGTATGTGTCGTTTGTGGATTCTTACACCAAAGCGCTGGTTTTTCAGCACTGGTAAGTCCGTTGTAAGCGTCAAAC  
TGCTAAGCTAATTAAGTGTTCACGTTTAAATACATAAGGTTTT

>PhCRN01\_703 PLHAL7032745

GAACGGAAGTGTGTGACATGATACGGGACGGACGAGGCATTCGGAAGTTCAACGAACCACTTGGGGATTCCGAGTTGGAATATGAAG  
GTGGAGTTCCTGCAACATTCAAGACGTTGCGAAAAGCCACTGTGGCCGCAATTTGCAAGTCTTCTCGATCGCATAACAGTGATATTC  
TCCGCGCTCCCCCTTTGTCCGGAAAGACGGCCTTGTGCGATCTACTCTACGACCACATTTGTTTCGCTCCAAGCCTGATGCACTTGT  
CCCGCATTCTGGCCAATCAAATGCCTGTAGATGGCAAGTTTACCAGATTTTTTCAAATTTTTGTACGGCTATGAGTTTGAAGCATTCT  
GCGCACACAAAGGCGATCGGGTGGTACTGATTGATGAAGCTCAAATTTACGTATAACGACGAGCAGCTGTGGAGGGGATACGTGAAAG  
GCGCATTGGAATCGCAAATACGAGGCCTTCGCTTCGTTCTCTTTTTCATCGTATGGCAGCTTTAATATTTACCAGCAAATTTGAACGCG  
CTGGAACCTCCGATCCTTGTGCCTCCTCAGAATACTTTTGGATTGAATGCCACACCATAACAAGCCTGGCCTGCAGCTTTACAGTGAAG  
AGCTGAAAGAAATGGCTCAAAACAGCATTGGCATATCAGCCTCCGATCTCATTTGGATCTTGTGCTCGGGTCATATCGGAATTTGCTC  
GAGCTATCCTCATCTTTTTGCATCGTAAGTTTGGTTCTTGAAAGCCAAACGATGAAGATGTTGAGCTGGAACCTTCGCTCCTTGGGGC  
TGCTGCAAGAAATTCGCTCCAGTTATCGGGGTATCCCAAGTGTGATGCTTTCGAGCGAGTGAAAGATGCTAATAACCTGCCGGATG  
AAGCAGTGTGAAGATGATTGGAATCTTGAATGGTGTGCTTCTGGCAAGTTTATGCTTGTATCAGATGGACATCGAATCCTAGAA  
GCCAGTTTGTGCGGAATTGTTGACAAGGTACGGGTCTTGTACGAGGATCAGGCGGGCAGCTTCAGTTCGCTTCAAGCATGCACC  
TCAAGATCTGGCTGTATTCAAATCGAACAGATCCAATTTTCGTACATGGTATCAGACGTGCGCACACGAAGACTTTGTTGTGCGGTGCG  
TACAGCGAATGAGTGTCTTTCGACTGCAGAACTTCGCGAACGAAAAACCAACGGCATTGCTCGAGAACGCCAAATACAGATGGAGC  
TATACGGCGCCACAGTATCATGCTTGCCTCGAGATGTGTTGGTTACCCCTGAATGGCGAACGACTGATGGCAAAGGATACATTGATT  
TAATGATTTCGTGGCTCGAGCATTCTTTGGTTTTGGGAGTTGTTAGTGAATGGTGACGATGCTGTGCGGCCACTCAAATCGATTTGAAA  
CTGGGGGAAGTACCATGGAAGCTTAACTGGAAGTTCTAAGTATGTGCTCATCGATTTTCGTCAGAGTAAGGGCGTTCCGGCACCAGA  
AGCATGGGTTTTCTGTATGTGTCGTTTGTGGATTCTTACACCAAAGCGCTGGTTTTTCAGCACTGGT

>PhCRN01\_710

GGGGTTCAGCAGAACGGAAGTGTGTGACATGATACGGGACGGACGAGGCATTCGGAAGTTCAACGAACCACTTGGGGATTCCGAGTTG  
GAATATGAAGGTGGAGTTCCTGCAACATTCAAGACGTTGCGAAAAGCCACTGTGGCCGCAATTTGCAAGTCTTCTCGATCGCATAACCA  
GTGATATTCATCCGCGCTCCCCCTTTGTCCGGAAAGACGGCCTTGTGCGATCTACTCTACGACCACATTTGTTTCGCTCCAAGCCTGAT  
GCACTTGTTCCTCCGCAATCTGGCCAATCAAATGCCTGTAGATGGCAAGTTTACCAGATTTTTTCAAATTTTTGTACGGCTATGAGTTT  
GAAGCATTCTGCGCACACAAAGGCGATCGGGTGGTACTGATTGATGGAGCTCAATTTACGTATAACGACGAGCAGCTGTGGAGGGGA  
TACGTGAAAGGCGCATTGGAATCGCAAATACGAGGCCTTCGCTTCGTTCTCTTTTTCATCGTATGGCAGCTTTAATATTTACCAGCAA  
TTTGAACGCGCTGGAACCTCCGATCCTTGTGCCTCCTCAGAATACTTTTGGATTGAATGCCACACCATAACAAGCCTGGCCTGCAGCTT

TCACGTGAGGAGCTGAAAGAAATGGCTCAAAACAGCATTGGCATATCAGCCTCCGATCTCATTTGGATCTTGTGCTCGGGTCATATC  
GGAATTGCTCGAGCTATCCTCATCTTTTTGCATCGTAAGTTTGGTCTTGAAAGCCAAACGATGAAGATGTTGAGCTGGAACCTTCGC  
TCCTTGGGGCTGCTGCAAGAAATTCGCTCCAGTTATCGGGGTATCCCAAGTCTGATGCTTTTCGAGCGAGTGAAAGATGCTAATAAC  
CTGCCGGATGAAGCAGTGCTGAAGATGATTGGAATCTTGAATGGTGTGCTTCTGGCAAGGTTATGCTTGTATCAGATGGACATCGA  
ACTCCTAGAAGCCAGTTTGTGTCGGAATTGTTGACAAGGTACGGGTTCTTGTACGAGGATCAGGCGGGGCAGCTTCAGTTTCGCTTCA  
AGCATGCACCTCAAGATCTGGCTGTATTCAAATCGAACAGATCCAATTTTCGTACATGGTATCAGACGTCGCACACGAAGACTTTGTT  
GTCGCGTGCCTACAGCGAATGAGTGCTTTGCGACTGCAGAACTTCGCGAACGAAAAACCAACGGCATTGCTCGAGAACGCCAAATA  
CAGATGGAGCTATACGGCGCCACAGTATCATGCTTGCCTCGAGATGTGTTGGTTACCCCTGAATGGCGAACGACTGATGGCAAAGGA  
TACATTGATTTAATGATTTCGTGGCTCGAGCATTCTTTGGTTTTGGGAGTTGTTAGTGAATGGTGACGATGCTGTCCGGCCACTCAAAT  
CGATTTGAAACTGGGGGGAAGTACCATGGAAGCTTAACTGGAAGTTCTAAGTATGTGCTCATCGATTTTCGTACAGTAAGGGCGTT  
CGGCACCAGAAGCATGGGTTTCTGTATGTGTCGTTTTGTGGATTCTTACACCAAAGCGCTGGTTTTTCAGCACTGGTAAGTCCGTTGTA  
AGCGTCAAACCTGCTAAGCTAATTAAGTTCACGTTTAAATACATAAGGTTTT

>PhCRN01\_304 PLHAL3043337

GGGATACGTGAAAGGCGCATTGGAATCGCAAATACGAGGCCTTCGCTTCGTTCTCTTTTCATCGTATGGCAGCTTTAATATTTACC  
CAAATTTGAACGCGCTGGAACCTCCGATCCTTGTGCCTCCTCAGAATACTTTTGGATTGAATGCCACACCATAACAAGCCTGGCCTGCA  
GCTTTCACGTGAGGAGCTGAAAGAAATGGCTCAAAACAGCATTGGCATATCAGCCTCCGATCTCATTTGGATCTTGTGCTCGGGTCA  
TATCGGAATTGCTCGAGCTATCCTCATCTTTTTGCATCGTAAGTTTGGTCTTGAAAGCCAAACGATGAAGATGTTGAGCTGGAAC  
TCGCTCCTTGGGGCTGCTGCAAGAAATTCGCTCCAGTTATCGGGGTATCCCAAGTCTGATGCTTTTCGAGCGAGTGAAAGATGCTAA  
TAACCTGCCGGATGAAGCAGTGCTGAAGATGATTGGAATCTTGAATGGTGTGCTTCTGGCAAGGTTATGCTTGTATCAGATGGACA  
TCGAACTCCTAGAAGCCAGTTTGTGTCGGAATTGTTGACAAGGTACGGGTTCTTGTACGAGGATCAGGCGGGGCAGCTTCAGTTTCGC  
TTCAAGCATGCACCTCAAGATCTGGCTGTATTCAAATCGAACAGATCCAATTTTCGTACATGGTATCAGACGTCGCACACGAAGACTT  
TGTTGTGTCGCTGCCTACAGCGAATGAGTGCTTTGCGACTGCAGAACTTCGCGAACGAAAAACCAACGGCATTGCTCGAGAACGCCA  
AATACAGATGGAGCTATACGGCGCCACAGTATCATGCTTGCCTCGAGATGTGTTGGTTACCCCTGAATGGCGAACGACTGATGGCAA  
AGGATACATTGATTTAATGATTTCGTGGCTCGAGCATTCTTTGGTTTTGGGAGTTGTTAGTGAATGGTGACGATGCTGTCCGGCCACTC  
AAATCGATTTGAAACTGGGGGGAAGTACCATGGAAGCTTAACTGGAAGTTCTAAGTATGTGCTCATCGATTTTCGTACAGTAAGGG  
CGTTCGGCACCAGAAGCATGGGTTTCTGTATGTGTCGTTTTGTGGATTCTTACACCAAAGCGCTGGTTTTTCAGCACTGGTAAGTCCGT  
TGTAAGCGTCAAACCTGCTAAGCTAATTAAGTTC

>PhCRN01\_700 PLHAL7004275

AGCTCAAATACGTATAACGACGAGCAGCTGTGGAGGGGATACGTGAAAGGCGCATTGGAATCGCAAATACGAGGCCTTCGCTTCGT  
TCTCTTTTCATCGTATGGCAGCTTTAATATTTACCAGCAAATTTGAACGCGCTGGAACCTCCGATCCTTGTGCCTCCTCAGAATACTTT  
TGGATTGAATGCCACACCATAACAAGCCTGGCCTGCAGCTTTCACGTGAGGAGCTGAAAGAAATGGCTCAAACAGCATTGGCATATC  
AGCCTCCGATCTCATTTGGATCTTGTGCTCGGGTCATATCGGAATTGCTCGAGCTATCCTCATCTTTTTGCATCGTAAGTTTGGTTC  
TGGAAAGCCAAACGATGAAGATGTTGAGCTGGAACCTTCGCTCCTTGGGGCTGCTGCAAGAAATTCGCTCCAGTTATCGGGGTATCCC  
AAGTGTGATGCTTTTCGAGCGAGTGAAAGATGCTAATAACCTGCCGGATGAAGCAGTGCTGAAGATGATTGGAATCTTGAATGGTGT  
TGCTTCTGGCAAGGTTATGCTTGTATCAGATGGACATCGAACTCCTAGAAGCCAGTTTGTGCGGAATTGTTGACAAGGTACGGGTT  
CTTGTACGAGGATCAGGCGGGGCAGCTTCAGTTTCGCTTCAAGCATGCACCTCAAGATCTGGCTGTATTCAAATCGAACAGATCCAAT  
TTCGTACATGGTATCAGACGTCGCACACGAAGACTTTGTTGTGTCGCTGCGTACAGCGAATGAGTGTCTTTCGACTGCAGAACTTCGC  
GAACGAAACACCAACGGCATTGCTCGAGAACGCCAAATACAGATGGAGCTATACGGCGCCACAGTATCATGCTTGCCTCGAGATGT  
GTTGGTTACCCCTGAATGGCGAACGACTGATGGCAAAGGATACATTGATTTAATGATTCTGGTTCGAGCATCTTTTGGTTTTGGGA  
GTTGTTAGTGAATGGTGACGATGCTGTCCGGCCACTCAAATCGATTTGAAACTGGGGGGAAGTACCATGGAAGCTTAACTGGAAGTT  
TAAGTATGTGCTCATCGATTTTCGTACAGAGTAAGGGCGTTCCGG

>PhCRN01\_730 PLHAL7303476

TTACGTATAACGACGAGCAGCTGTGGAGGGGATACGTGAAAGGCGCATTGGAATCGCAAATACGAGGCCTTCGCTTCGTTCTCTTTT  
CATCGTATGGCAGCTTTAATATTTACCAGCAAATTTGAACGCGCTGGAACCTCCGATCCTTGTGCCTCCTCAGAATACTTTTGGATTGA  
ATGCCACACCATAACAAGCCTGGCCTGCAGCTTTCACGTGAGGAGCTGAAAGAAATGGCTCAAACAGCATTGGCATATCAGCCTCCG  
ATCTCATTTGGATCTTGTGCTCGGGTCATATCGGAATTGCTCGAGTATCCTCATCTTTTTGCATCGTAAGTTTGGTTCGAAAGC  
CAAACGATGAAGATGTTGAGCTGGAACCTTCGCTCCTTGGGGCTGCTGCAAGAAATTCGCTCCAGTTATCGGGGTATCCCAAGTGTG  
ATGCTTTTCGAGCGAGTGAAAGATGCTAATAACCTGCCGGATGAAGCAGTGCTGAAGATGATTGGAATCTTGAATGGTGTGCTTCTG  
GCAAGGTTATGCTTGTATCAGATGGACATCGAACTCCTAGAAGCCAGTTTGTGCGGAATTGTTGACAAGGTACGGGTTCTTGTACG  
AGGATCAGGCGGGGCAGCTTCAGTTTCGCTTCAAGCATGCACCTCAAGATCTGGCTGTATTCAAATCGAACAGATCCAATTTTCGTACA  
TGGTATCAGACGTCGCACACGAAGACTTTGTTGTGTCGCTGCGTACAGCGAATGAGTGTCTTTCGACTGCAGAACTTCGCGAACGAAA  
ACACCAACGGCATTGCTCGAGAACGCCAAATACAGATGGAGCTATACGGCGCCACAGTATCATGCTTGCCTCGAGATGTGTTGGTTA  
CCCCTGAATGGCGAACGACTGATGGCAAAGGATACATTGATTTAATGATTCTGGTTCGAGCATCTTTTGGTTTTGGGAGTTGTTAG  
TGAATGGTGACGATGCTGTCCGGCCACTCAAATCGATTTGAAACTGGGGGGAAGTACCATGGAAGCTTAACTGGAAGTTCTAAGTATG  
TGCTCATCGATTTTCGTACAGAGTAAGGGCGTTCCGGCACCAGAAGCATGGGTTTTCTGTA

>PhCRN02\_100 PLHAL100A12728

GATGTGTTGGATATGAATGGAATGCCACCGCCTCAAACGCGGCAAATTCACGTGCTGGTGGTGGTTCCGTATCGGACCGAGGATGCC  
AACCTTTCCAGATTTTTCGACCTTTTCGACCATACTGTGAGGGAATCAATGTGCAGCACCCCTCATCTTTCGCGGGATGTGCTGGTT  
GAAAACTCTACGAAGCTATTATCCGAACCAATTTTGTGCTGTTATCGTCTCCTTCCGGTTCTGAAAGACGTCGCTGTTGACATTG  
TTTTCGCGTAAACATCCTGAAATTTTCTGCGCACCTATCGCTTTTGTGTTAGTGGTACAGAGATGCCACAACCTTCTTTCCACTTAT  
GGCCTCAATGTTTATAAAGAAGGCGTGCATATACCCAGTGGCAAGCTGTGTGCTTGTGTTGGACGACTGTCAACGGCGCTATAAT  
GATCTCGTCTTTTGGACTCGTGTATTAAAGCTCAGCATGTTTACCAGATCAGTCCGATTTTATCATCTCTCGGCGACTATTG  
CTGGAGACGGATGCCCTTCCAGCCTTGTGCTTTCAGCAGCATCCAGTATAAGTTGACGAGGACGATTTCTTGTATTAAATGATGAG  
GAGGCGTATCAGTGCTTTAATTTGAAACCGCCTACCACCAGGATTGCGTTTTTCCAACGCTGGTAGAGGTGATGATACGCGAGTGC  
AATGGGCACATCGGTTTATTACGCATATCAATTTGATGCAATTTTATGAGCGTTTTTCGGAGGGCGGGTGTCTCGAACTGAGGAGGAGTTG  
CTGGCGTTCTATCTGTCCGACTTTTGTGCAACAAATGGCAAGATGCTTCGGAAGTGAACACACACACACCTGCTAGTCCAAACCAGCA

GAAGTTTCTTAGCACGTGTTTGTGTGCGATCGTCAGCCACTGGTACAGCAATTGAGTCGTGATGAACACGAATGTTTTACAAGGTT  
GAAGAAAGCGGGTATTGTAAGTGAAGTTGGCGGCT

>PhCRN02\_334 PLHAL3343893

GATGTGTTGGATATGAATGGAATGCCACCGCCTCAAACGCGGCAAATTCACGTGCTGGTGGTGGTTCCGTATCGGACCGAGGATGCC  
AACCTTTCCAGATTTTTCCGACCTTTTCGACCATACTGTGAGGGAATCAATGTGCAGTACCCCTCATCTTTTCGCGGGATGTGCTGGTT  
GAAAACTCTACGAAGCTATTATCCGAACCAATTTTGTGCTGTTATCGTCTCCTTCCGGTTCTGGAAAGACGTGCGTGTGACATTG  
TTTGCGCGTAAACATCCTGAAATTTCTGCGCACCTATCGCTTTTGATGGTAGCACAGAAGATGCCACAACCTCTTCTTTCCACTTAT  
GGCGTCAATGTTTATAAGAAGGCGTGCATATAACCCAGTGGCAAGCTGTGTGCTTGTGTTGGACGACTGTCAACGGCGGTATAAT  
GATCTCGTCTTTTGGACTCGTCTGATTAAAGGCTCAGCATCATGGTTACCAGATCACGTCCGATTTATCATCTCGGCGACTCATTTG  
CTGGAGACGGATGCCCCCTCCAGCCCTGTTGCTTTCAGCAGCATCCAGTATAAGTTGACGAGGGACGATTTCTTGATTAATGATGAG  
GAGGCGTATCAGTGCCTCAATTTGGAAAACGGCCTACCACCAGGATTGCGTTTTCCAACGCTGGTAGAGGTGATGATACGCGAGTGC  
AATGGGCACATCGGTTTCATTACGCATATCAATTTGATGCAATTTATGAGCGTTTTTCGGAGGGCGGGTGTCTCGAACTGAGGAGGATTG  
CTGGCGTTCTATCTGTGCGACTTTTGTGCAACAAATGGCAAGATGCTTCGGAAGTGAACACACAACACCTGCTAGTCCAAACCAGCA  
GAAGTTTCTTAGCACGTGTTTGTGTGCGATC

>PhCRN02\_703 PLHAL7034223

CCTTTCGACCATACTGTGAGGGAATCAATGTGCAGCACCCCTCATCTTTTCGCGGGATGTGCTGGTTGAAAACTCTACGAAGCTATTA  
TCCGAACCAATTTTGTGCTGTTATCGTCTCCTTCCGGTTCTGGAAAGACGTGCGTGTGACATTGTTTTCGCGTAAACATCCTGAAA  
TTTCTGCGCACCTATCGCTTTTGATGGTAGCACAGAAGATGCCACAACCTCTTCTTTCCACTTATGGCGTCAATGTTTATAAGAAGG  
CGTGCATATAACCCAGTGGCAAGCTGTGTGCTTGTGTTGGACGACTGTCAACGGCGGTATAATGATCTCGTCTTTTGGACTCGTC  
TGATTAAGGCTCAGCATCATGGTTACCAGATCACGTCCGATTTATCATCTCGGCGACTCATTTGCTGGAGACGGATGCCCCCTCCA  
GCCCTGTTGCTTTCAGCAGCATCCAGTATAAGTTGACGAGGGACGATTTCTTGATTAATGATGAGGAGGCGTATCAGTGCCTTAATT  
TGGAAAACGGCCTACCACCAGGATTGCGTTTTCCAACGCTGGTAGAGGTGATGATACGCGAGTGAATGGGCACATCGGTTTCATTAC  
GCATATCAATTTGATGCAATTTATGAGCGTTTTTCGGAGGGCGGGTGTCTGAACTGAGGAGGAGTTGCTGGCGTTCTATCTGTCCG

>PhCRN02\_710 PLHAL7104310

GATGTGTTGGATATGAATGGAATGCCACCGCCTCAAACGCGGCAAATTCACGTGCTGGTGGTGGTTCCGTATCGGACCGAGGATGCC  
AACCTTTCCAGATTTTTCCGACCTTTTCGACCATACTGTGAGGGAATCAATGTGCAGCACCCCTCATCTTTTCGCGGGATGTGCTGGTT  
GAAAACTCTACGAAGCTATTATCCGAACCAATTTTGTGCTGTTATCGTCTCCTTCCGGTTCTGGAAAGACGTGCGTGTGACATTG  
TTTGCGCGTAAACATCCTGAAATTTCTGCGCACCTATCGCTTTTGATGGTAGCACAGAAGATGCCACAACCTCTTCTTTCCACTTAT  
GGCGTCAATGTTTATAAGAAGGCGTGCATATAACCCAGTGGCAAGCTGTGTGCTTGTGTTGGACGACTGTCAACGGCGGTATAAT  
GATCTCGTCTTTTGGACTCGTCTGATTAAAGGCTCAGCATCATGGTTACCAGATCACGTCCGATTTATCATCTCGGCGACTCATTTG  
CTGGAGACGGATGCCCCCTCCAGCCCTGTTGCTTTCAGCAGCATCCAGTATAAGTTGACGAGGGACGATTTCTTGATTAATGATGAG  
GAGGCGTATCAGTGCCTTAATTTGGAAAACGGCCTACCACCAGGATTGCGTTTTCCAACGCTGGTAGAGGTGATGATACGCGAGTGC  
AATGGGCACATCGGTTTCATTACGCATATCAATTTGATGCAATTTATGAGCGTTTTTCGGAGGGCGGGTGTCTCGAACTGAGGAGGAGTTG  
CTGGCGTTCTATCTGTCCG

>PhCRN02\_304 PLHAL3042846

GATGTGTTGGATATGAATGGAATGCCACCGCCTCAAACGCGGCAAATTCACGTGCTGGTGGTGGTTCCGTATCGGACCGAGGATGCC  
AACCTTTCCAGATTTTTCCGACCTTTTCGACCATACTGTGAGGGAATCAATGTGCAGCACCCCTCATCTTTTCGCGGGATGTGCTGGTT  
GAAAACTCTACGAAGCTATTATCCGAACCAATTTTGTGCTGTTATCGTCTCCTTCCGGTTCTGGAAAGACGTGCGTGTGACATTG  
TTTGCGCGTAAACATCCTGAAATTTCTGCGCACCTATCGCTTTTGATGGTAGCACAGAAGATGCCACAACCTCTTCTTTCCACTTAT  
GGCGTCAATGTTTATAAGAAGGCGTGCATATAACCCAGTGGCAAGCTGTGTGCTTGTGTTGGACGACTGTCAACGGCGGTATAAT  
GATCTCGTCTTTTGGACTCGTCTGATTAAAGGCTCAGCATCATGGTTACCAGATCACGTCCGATTTATCATCTCGGCGACTCATTTG  
CTGGAGACGGATGCCCCCTCCAGCCCTGTTGCTTTCAGCAGCATCCAGTATAAGTTGACGAGGGACGATTTCTTGATTAATGATGAG  
GAGGCGTATCAGTGCCTTAATTTGGAAAACGGCCTACCACCAGGATTGCGTTTTCCAACGCTGGTAGAGGTGATGATACGCGAGTGC  
AATGGGCACATCGGTTTCATTACGCATATCAATTTGATGCAATTTATGAGCGTTTTTCGGAGGGCGGGTGTCTCGAACTGAGGAGGAGTTG  
CTGGCGTTCTATCTGTCCGACTTTTGTGCAACAAATGGCAAGATGCTTCGGAAGTGAACACACAACACCTGCTAGTCCAAACCAGCA  
GAAGTTTCTTAGCACGTGTTTGTGTGCGATCGTCAGCCACTGGTACAGCAATTGAGTCGTGATGAACACGAATGTTTTACAAGGTT  
GAAGAAAGCGGGTATTGTAAGTGAAGTTGGCGGCT

>PhCRN02\_700 PLHAL7004676

TTGGATATGAATGGAATGCCACCGCCTCAAACGCGGCAAATTCACGTGCTGGTGGTGGTTCCGTATCGGACCGAGGATGCCAACCTT  
TCCCAGATTTTTCCGACCTTTTCGACCATACTGTGAGGGAATCAATGTGCAGCACCCCTCATCTTTTCGCGGGATGTGCTGGTTGAAAA  
CTCTACGAAGCTATTATCCGAACCAATTTTGTGCTGTTATCGTCTCCTTCCGGTTCTGGAAAGACGTGCGTGTGACATTGTTTTCG  
CGTAAACATCCTGAAATTTCTGCGCACCTATCGCTTTTGATGGTAGCACAGAAGATGCCACAACCTCTTCTTTCCACTTATGGCGTC  
AATGTTTATAAGAAGGCGTGCATATAACCCAGTGGCAAGCTGTGTGCTTGTGTTGGACGACTGTCAACGGCGGTATAATGATCTC  
GCTTTTGGACTCGTCTGATTAAAGGCTCAGCATCATGGTTACCAGATCACGTCCGATTTATCATCTCGGCGACTCATTTGCTGGAG  
ACGGATGCCCCCTCCAGCCCTGTTGCTTTCAGCAGCATCCAGTATAAGTTGACGAGGGACGATTTCTTGATTAATGATGAGGAGGCG  
TATCAGTGCCTTAATTTGGAAAACGGCCTACCACCAGGATTGCGTTTTCCAACGCTGGTAGAGGTGATGATACGCGAGTGAATGGG  
CACATCGGTTTCATTACGCATATCAATTTGATGCAATTTATGAGCGTTTTTCGGAGGGCGGGTGTCTCGAACTGAGGAGGAGTTGCTGGCG  
TTCTATCTGTGCGACTTTTGTGCAACAAATGGCAAGATGCTTCGGAAGTGAACACACAACACCTGCTAGTCCAAACCAGCAGAAGTT  
TCTTAGCACGTGTTTGTGTGCGATC

>PhCRN02\_730 PLHAL7303907

GATGTGTTGGATATGAATGGAATGCCACCGCCTCAAACGCGGCAAATTCACGTGCTGGTGGTGGTTCCGTATCGGACCGAGGATGCC  
AACCTTTCCAGATTTTTCCGACCTTTTCGACCATACTGTGAGGGAATCAATGTGCAGCACCCCTCATCTTTTCGCGGGATGTGCTGGTT  
GAAAACTCTACGAAGCTATTATCCGAACCAATTTTGTGCTGTTATCGTCTCCTTCCGGTTCTGGAAAGACGTGCGTGTGACATTG  
TTTGCGCGTAAACATCCTGAAATTTCTGCGCACCTATCGCTTTTGATGGTAGCACAGAAGATGCCACAACCTCTTCTTTCCACTTAT  
GGCGTCAATGTTTATAAGAAGGCGTGCATATAACCCAGTGGCAAGCTGTGTGCTTGTGTTGGACGACTGTCAACGGCGGTATAAT  
GATCTCGTCTTTTGGACTCGTCTGATTAAAGGCTCAGCATCATGGTTACCAGATCACGTCCGATTTATCATCTCGGCGACTCATTTG  
CTGGAGACGGATGCCCCCTCCAGCCCTGTTGCTTTCAGCAGCATCCAGTATAAGTTGACGAGGGACGATTTCTTGATTAATGATGAG

GAGGCGTATCAGTGCTTTAATTTGGAAAACGGCCTACCACCAGGATTGCGTTTTCCAACGCTGGTAGAGGTGATGATACGCGAGTGC  
AATGGGCACATCGGTTTCATTACGCATATCAATTGATGCAATTTATGAGCGTTTTTCGGAGGGCGGGTGCTCGAACTGAGGAGGAGTTG  
CTGGCGTTCTATCTGTGCGACTTTTTGTGCAACAAATGGCAAGATGCTTCGGAAGTGAACACACAACACCTGCTAGTCCAAACCAGCA  
GAAGTTTCTTAGCACGTGTTTTGTTGTGCGATC

>PhCRN03\_100 PLHAL100A13606

AGCGTCAAGTCTTTATTATGGCTATTATTGAAGCTGTATGCCTTATGCTTGGTGATGCCACGATTCTTGTGTTGAAGAGGATGTGAAAG  
GAAAGAACGTACATGTGCACGGTCGCTTCGAGTTTGTGCTGAAGCGTGGCAAGAAGCGTGTATCCATCGTCAAGCAAACGCGATG  
ATATCCCGCAAGGATTGCCAGAATGTGGCCGGCCTCGAAGCTTTGTCTGACGTGGAGGGATTAGAGCGGACACTTGGTATTGTTA  
CCAACATCTGGAGTGGGTATTTCATCAGCGATGACGATGAGAAAATTCGACGGATGAATACAACGCTCAAAGTCTATGGAGCGGTGC  
CTTCAACTAAAGAAGCTTAGGGAAATTTGTCGGCATGATTTGTGGTTTGTCTCGCAATAGCACTTAATAGTCTCGCAATTACAATATTT  
TTTACGAATGCCATTCCGTGTTGGAAAGTTGCTTTTCATCAGTTTTATTAGACCCGGCCACTGCAAGTGCCTTGCAGTTAACATCGAA  
GCACAGCACAAAATAAATTTTTATTCTGATAAAATAAAAA

>PhCRN03\_334 PLHAL3343720

AGCGTCAAGTCTTTATTATGGCTATTATTGAAGCTGTATGCCTTATGCTTGGTGATGCCACGATTCTTGTGTTGAAGAGGATGTGAAAG  
GAAAGAACGTACATGTGCACGGTCGCTTCGAGTTTGTGCTGAAGCGTGGCAAGAAGCGTGTATCCATCGTCAAGCAAACGCGATG  
ATATCCCGCAAGGATTGCCAGAATGTGGCCGGCCTCGAAGCTTTGTCTGACGTGGAGGGATTAGAGCGGACACTTGGTATTGTTA  
CCAACATCTGGAGTGGGTATTTCATCAGCGATGACGATGAGAAAATTCGACGGATGAATACAACGCTCAAAGTCTATGGAGCGGTGC  
CTTCAACTAAAGAAGCTTAGGGAAATTTGTCGGCATGATTTGTGGTTTGTCTCGCAATAGCACTTAATAGTCTCGCAATTACAATATTT  
TTTACGAATGCCATTCCGTGTTGGAAAGTTGCTTTTCATCAGTTTTATTAGACCCGGCCACTGCAAGTGCCTTGCAGTTAACATCGAA  
GCACAGCACAAAATAAATTTTTATTCTGATAAAATAAAAA

>PhCRN03\_703 PLHAL7033388

AGCGTCAAGTCTTTATTATGGCTATTATTGAAGCTGTATGCCTTATGCTTGGTGATGCCACGATTCTTGTGTTGAAGAGGATGTGAAAG  
GAAAGAACGTACATGTGCACGGTCGCTTCGAGTTTGTGCTGAAGCGTGGCAAGAAGCGTGTATCCATCGTCAAGCAAACGCGATG  
ATATCCCGCAAGGATTGCCAGAATGTGGCCGGCCTCGAAGCTTTGTCTGACGTGGAGGGATTAGAGCGGACACTTGGTATTGTTA  
CCAACATCTGGAGTGGGTATTTCATCAGCGATGACGATGAGAAAATTCGACGGATGAATACAACGCTCAAAGTCTATGGAGCGGTGC  
CTTCAACTAAAGAAGCTTAGGGAAATTTGTCGGCATGATTTGTGGTTTGTCTCGCAATAGCACTTAATAGTCTCGCAATTACAATATTT  
TTTACGAATGCCATTCCGTGTTGGAAAGTTGCTTTTCATCAGTTTTATTAGACCCGGCCACTGCAAGTGCCTTGCAGTTAACATCGAA  
GCACAGCACAAAATAAATTTTTATTCTGATAAAATAAAAA

>PhCRN03\_710 PLHAL7103757

AGCGTCAAGTCTTTATTATGGCTATTATTGAAGCTGTATGCCTTATGCTTGGTGATGCCACGATTCTTGTGTTGAAGAGGATGTGAAAG  
GAAAGAACGTACATGTGCACGGTCGCTTCGAGTTTGTGCTGAAGCGTGGCAAGAAGCGTGTATCCATCGTCAAGCAAACGCGATG  
ATATCCCGCAAGGATTGCCAGAATGTGGCCGGCCTCGAAGCTTTGTCTGACGTGGAGGGATTAGAGCGGACACTTGGTATTGTTA  
CCAACATCTGGAGTGGGTATTTCATCAGCGATGACGATGAGAAAATTCGACGGATGAATACAACGCTCAAAGTCTATGGAGCGGTGC  
CTTCAACTAAAGAAGCTTAGGGAAATTTGTCGGCATGATTTGTGGTTTGTCTCGCAATAGCACTTAATAGTCTCGCAATTACAATATTT  
TTTACGAATGCCATTCCGTGTTGGAAAGTTGCTTTTCATCAGTTTTATTAGACCCGGCCACTGCAAGTGCCTTGCAGTTAACATCGAA  
GCACAGCACAAAATAAATTTTTATTCTGATAAAATAAAAA

>PhCRN03\_304 PLHAL3043566

AGCGTCAAGTCTTTATTATGGCTATTATTGAAGCTGTATGCCTTATGCTTGGTGATGCCACGATTCTTGTGTTGAAGAGGATGTGAAAG  
GAAAGAACGTACATGTGCACGGTCGCTTCGAGTTTGTGCTGAAGCGTGGCAAGAAGCGTGTATCCATCGTCAAGCAAACGCGATG  
ATATCCCGCAAGGATTGCCAGAATGTGGCCGGCCTCGAAGCTTTGTCTGACGTGGAGGGATTAGAGCGGACACTTGGTATTGTTA  
CCAACATCTGGAGTGGGTATTTCATCAGCGATGACGATGAGAAAATTCGACGGATGAATACAACGCTCAAAGTCTATGGAGCGGTGC  
CTTCAACTAAAGAAGCTTAGGGAAATTTGTCGGCATGATTTGTGGTTTGTCTCGCAATAGCACTTAATAGTCTCGCAATTACAATATTT  
TTTACGAATGCCATTCCGTGTTGGAAAGTTGCTTTTCATCAGTTTTATTAGACCCGGCCACTGCAAGTGCCTTGCAGTTAACATCGAA  
GCACAGCACAAAATAAATTTTTATTCTGATAAAATAAAAA

>PhCRN03\_700 PLHAL7004445

AGCGTCAAGTCTTTATTATGGCTATTATTGAAGCTGTATGCCTTATGCTTGGTGATGCCACGATTCTTGTGTTGAAGAGGATGTGAAAG  
GAAAGAACGTACATGTGCACGGTCGCTTCGAGTTTGTGCTGAAGCGTGGCAAGAAGCGTGTATCCATCGTCAAGCAAACGCGATG  
ATATCCCGCAAGGATTGCCAGAATGTGGCCGGCCTCGAAGCTTTGTCTGACGTGGAGGGATTAGAGCGGACACTTGGTATTGTTA  
CCAACATCTGGAGTGGGTATTTCATCAGCGATGACGATGAGAAAATTCGACGGATGAATACAACGCTCAAAGTCTATGGAGCGGTGC  
CTTCAACTAAAGAAGCTTAGGGAAATTTGTCGGCATGATTTGTGGTTTGTCTCGCAATAGCACTTAATAGTCTCGCAATTACAATATTT  
TTTACGAATGCCATTCCGTGTTGGAAAGTTGCTTTTCATCAGTTTTATTAGACCCGGCCACTGCAAGTGCCTTGCAGTTAACATCGAA  
GCACAGCACAAAATAAATTTTTATTCTGATAAAATAAAAA

>PhCRN03\_730 PLHAL7303709

AGCGTCAAGTCTTTATTATGGCTATTATTGAAGCTGTATGCCTTATGCTTGGTGATGCCACGATTCTTGTGTTGAAGAGGATGTGAAAG  
GAAAGAACGTACATGTGCACGGTCGCTTCGAGTTTGTGCTGAAGCGTGGCAAGAAGCGTGTATCCATCGTCAAGCAAACGCGATG  
ATATCCCGCAAGGATTGCCAGAATGTGGCCGGCCTCGAAGCTTTGTCTGACGTGGAGGGATTAGAGCGGACACTTGGTATTGTTA  
CCAACATCTGGAGTGGGTATTTCATCAGCGATGACGATGAGAAAATTCGACGGATGAATACAACGCTCAAAGTCTATGGAGCGGTGC  
CTTCAACTAAAGAAGCTTAGGGAAATTTGTCGGCATGATTTGTGGTTTGTCTCGCAATAGCACTTAATAGTCTCGCAATTACAATATTT  
TTTACGAATGCCATTCCGTGTTGGAAAGTTGCTTTTCATCAGTTTTATTAGACCCGGCCACTGCAAGTGCCTTGCAGTTAACATCGAA  
GCACAGCACAAAATAAATTTTTATTCTGATAAAATAAAAA

>PhCRN05\_100 PLHAL100A10250

TCCGCCGGCTCGAGGAAAGATGGTGAAGCTCTTCTGTGCGATTGTTGGTGTGGCGGGAAGCGGTTCTCGGTGGAAATGACGAAGG  
CAAACGCGTGGATGAATTGAAGAAGGCGATCAAGGAGGAGAACTCGGACGACCCAATCCTGAAAAATGTCGCTCCGAAGAACCCTGCA  
GCTCTTTCTGGCGAAGAAAGACGGCGGTGGCTGAAGTCAAGGATCCTGCCGTGATTGCTATGCGGAGTGGGGGTGTTCCCGAGCA  
AGTCAAGGCACTGCTGGACGTGGAAATGGATCCAGCAGACGAGATTGGTGACTTGTGTTGGTGATGCTCCGACGAAGAAGACCATTCA



>PhCRN05\_730 PLHAL7300262

TCCGCCGGCTCGAGGAAAGATGGTGAAGCTCTTCTGTGCGATTGTTGGTGTGGCGGAAGCGCGTTCTCGGTGAAATTGACGAAGG  
CAAAACGGTGGATGAATTGAAGAAGGCGATCAAGGAGGAGAACTCGGACGACCCAATCCTGAAAAATGTCGCTCCGAAGAACCTGCA  
GCTCTTTCTGGCGAAGAAAGACGGCGCGTGGCTGAAGTCGAAGGATCCTGCCGTGATTGCTATGCGGAGTGGGGGTGTTCCCGAGCA  
AGTCAAGGCACTGCTGGACGTGGAAATGGATCCAGCAGACGAGATTGGTGACTTGTGGTGATGCTCCGACGAAGAAGACCATTCA  
TGTGTTGGTGGTGGTTCTAACTCAGCAACAAGCTGCTTCAATCAAGAAGCAACTGCGATACAAGGGAATGAGCACCGAAGCTTCGTG  
TCGCAAGTTCTTGGATGCGTTGGCGCAGAATCTCGCCACGCTGTACGACTTTGAGTGCAGTTATGGTGATGTCGCGACAATTGGCGA  
CGTCTTCAGTGCTGTCAAAAATGATGAATGGGGTTTTTCGTCTGAAGAGAGGGAGGCAGTTGACCAGTGAACCATTGCCAAGCTTCTT  
CACCGAGGACGAGTGGAAAGACCTCAAGGATTTGAATTGGCGTACAAAATCGCCGTATTCACGATGGCAAGGTTCCCAACCAGCAA  
AGGGAATCGTACGTCATTCTCCCGCACGCCATTTTCAGTGATGATCGAGTCGACAGATACAAAATATTGCGACTAGAGCAAGCGT  
GGTGTTCGAAGCGACCGAGTTTCAAGTGAAGATGAAGATGAGTTCTCGGGTAGTTCTCGTTCAAGTAGTGGTTCGTTCCGGATATTG  
ATGATTTTCATCGTAGTTCTAGCTGGTACATAAACCTGAATCCAAGCTCAACTACAATTTTTGTTTT

>PhCRN06.1\_100 PLHAL100A12116

AATCTACCGCCTCGAGGAACGATGGTGCAGCTCTTCTGTGCGGTGCGTTGGTAAAAGAGGGAAGCACGTTCTCCATAGACATTGACACG  
AACAAGTCGGTGGACCACTTGAATGATGCGATCATGGCAAAAAAGCCGAACGCTTTTAAAGGTTTTGATGCCGACGAGCTTGAGCTC  
TCTCTGGCGAAGAAGGGGCGCAGGATGGCTACCAAGTGCAGAACTTAGTGCGATACGAAAAGGAGAGGATATACCGGGTTTCGAAAAG  
ATATCACTGGTTGATACAGAGGATGAGCCATATTCGACCTATTCGCTTCGGGTTGTGTTGGAGACGAATCAAATGCCACCGCTCAA  
ACACGACAAATTCACGTGCTGGTGTGGTTCCAGATCAGCTGTGCGTTTCTGCTGTTGCGACCGTTTCGATCAAGAAGAGAAAGCTA  
ACTGA

>PhCRN06.1\_334 PLHAL3342222

AATCTACCGCCTCGAGGAACGATGGTGCAGCTCTTCTGTGCGGTGCGTTGGTAAAAGAGGGAAGCACGTTCTCCATAGACATTGACACG  
AACAAGTCGGTGGACCACTTGAATGATGCGATCATGGCAAAAAAGCCGAACGCTTTTAAAGGTTTTGATGCCGACGAGCTTGAGCTC  
TCTCTGGCGAAGAAGGGGCGCAGGATGGCTACCAAGTGCAGAACTTAGTGCGATACGAAAAGGAGAGGATATACCGGGTTTCGAAAAG  
ATATCACTGGTTGATACAGAGGATGAGCCATATTCGACCTATTCGCTTCGGGTTGTGTTGGAGACGAATCAAATGCCACCGCTCAA  
ACACGACAAATTCACGTGCTGGTGTGGTTCCAGATCAGCTGTGCGTTTCTGCTGTTGCGACCGTTTCGATCAAGAAGAGAAAGCTA  
ACTGA

>PhCRN06.1\_703 PLHAL7031980

AATCTACCGCCTCGAGGAACGATGGTGCAGCTCTTCTGTGCGGTGCGTTGGTAAAAGAGGGAAGCACGTTCTCCATAGACATTGACACG  
AACAAGTCGGTGGACCACTTGAATGATGCGATCATGGCAAAAAAGCCGAACGCTTTTAAAGGTTTTGATGCCGACGAGCTTGAGCTC  
TCTCTGGCGAAGAAGGGGCGCAGGATGGCTACCAAGTGCAGAACTTAGTGCGATACGAAAAGGAGAGGATATACCGGGTTTCGAAAAG  
ATATCACTGGTTGATACAGAGGATGAGCCATATTCGACCTATTCGCTTCGGGTTGTGTTGGAGACGAATCAAATGCCACCGCTCAA  
ACACGACAAATTCACGTGCTGGTGTGGTTCCAGATCAGCTGTGCGTTTCTGCTGTTGCGACCGTTTCGATCAAGAAGAGAAAGCTA  
ACTGA

>PhCRN06.1\_710 PLHAL7101192

AATCTACCGCCTCGAGGAACGATGGTGCAGCTCTTCTGTGCGGTGCGTTGGTAAAAGAGGGAAGCACGTTCTCCATAGACATTGACACG  
AACAAGTCGGTGGACCACTTGAATGATGCGATCATGGCAAAAAAGCCGAACGCTTTTAAAGGTTTTGATGCCGACGAGCTTGAGCTC  
TCTCTGGCGAAGAAGGGGCGCAGGATGGCTACCAAGTGCAGAACTTAGTGCGATACGAAAAGGAGAGGATATACCGGGTTTCGAAAAG  
ATATCACTGGTTGATACAGAGGATGAGCCATATTCGACCTATTCGCTTCGGGTTGTGTTGGAGACGAATCAAATGCCACCGCTCAA  
ACACGACAAATTCACGTGCTGGTGTGGTTCCAGATCAGCTGTGCGTTTCTGCTGTTGCGACCGTTTCGATCAAGAAGAGAAAGCTA  
ACTGA

>PhCRN06.1\_304 PLHAL3042116

AATCTACCGCCTCGAGGAACGATGGTGCAGCTCTTCTGTGCGGTGCGTTGGTAAAAGAGGGAAGCACGTTCTCCATAGACATTGACACG  
AACAAGTCGGTGGACCACTTGAATGATGCGATCATGGCAAAAAAGCCGAACGCTTTTAAAGGTTTTGATGCCGACGAGCTTGAGCTC  
TCTCTGGCGAAGAAGGGGCGCAGGATGGCTACCAAGTGCAGAACTTAGTGCGATACGAAAAGGAGAGGATATACCGGGTTTCGAAAAG  
ATATCACTGGTTGATACAGAGGATGAGCCATATTCGACCTATTCGCTTCGGGTTGTGTTGGAGACGAATCAAATGCCACCGCTCAA  
ACACGACAAATTCACGTGCTGGTGTGGTTCCAGATCAGCTGTGCGTTTCTGCTGTTGCGACCGTTTCGATCAAGAAGAGAAAGCTA  
ACTGA

>PhCRN06.1\_700 PLHAL7002541

AATCTACCGCCTCGAGGAACGATGGTGCAGCTCTTCTGTGCGGTGCGTTGGTAAAAGAGGGAAGCACGTTCTCCATAGACATTGACACG  
AACAAGTCGGTGGACCACTTGAATGATGCGATCATGGCAAAAAAGCCGAACGCTTTTAAAGGTTTTGATGCCGACGAGCTTGAGCTC  
TCTCTGGCGAAGAAGGGGCGCAGGATGGCTACCAAGTGCAGAACTTAGTGCGATACGAAAAGGAGAGGATATACCGGGTTTCGAAAAG  
ATATCACTGGTTGATACAGAGGATGAGCCATATTCGACCTATTCGCTTCGGGTTGTGTTGGAGACGAATCAAATGCCACCGCTCAA  
ACACGACAAATTCACGTGCTGGTGTGGTTCCAGATCAGCTGTGCGTTTCTGCTGTTGCGACCGTTTCGATCAAGAAGAGAAAGCTA  
ACTGA

>PhCRN06.1\_730 PLHAL7302045

AATCTACCGCCTCGAGGAACGATGGTGCAGCTCTTCTGTGCGGTGCGTTGGTAAAAGAGGGAAGCACGTTCTCCATAGACATTGACACG  
AACAAGTCGGTGGACCACTTGAATGATGCGATCATGGCAAAAAAGCCGAACGCTTTTAAAGGTTTTGATGCCGACGAGCTTGAGCTC  
TCTCTGGCGAAGAAGGGGCGCAGGATGGCTACCAAGTGCAGAACTTAGTGCGATACGAAAAGGAGAGGATATACCGGGTTTCGAAAAG  
ATATCACTGGTTGATACAGAGGATGAGCCATATTCGACCTATTCGCTTCGGGTTGTGTTGGAGACGAATCAAATGCCACCGCTCAA  
ACACGACAAATTCACGTGCTGGTGTGGTTCCAGATCAGCTGTGCGTTTCTGCTGTTGCGACCGTTTCGATCAAGAAGAGAAAGCTA  
ACTGA

>PhCRN06.2\_100 PLHAL100A11086

TCGTCGTAATGGAGCAACTTTCATTGTGTCCCCTTCGTCACGCCAATGGCATGATAGTTTCGTAATCAGCTACTGAAGATCGAAAACA  
CTCTGAAAGATGGATCTTTTCGTCCACGGTATCTTCGGGAGCAAAAACGTGATGTGGGATACCAGTAAGAACCGAGTCGTATTGATTG  
ATTTTCGATTGGTCCGGGAAGAGATGGTGTGATACGTATCCACCATTATGAATTTGTGAAATAGCATGGCCAACAGGAGCCGCGTGTG

GCGAGCCGCTTCGAGTTGCCCATGATGCGTATTGGATTGTTTCGATAGCTGCCCGATTGACATAAGGCCGAACTTTAAATTTACCGC  
GTAATCTATTACGTTTTATT

>PhCRN06.2\_334 PLHAL3341178

TCGTCGTAATGGAGCAACTTTTCATTGTGTCCCCTTCGTCACGCCAATGGCATGATAGTTCGTAATCAGCTACTGAAGATCGAAAACA  
CTCTGAAAGATGGATCTTTTCGTCACGGTGATCTTCGGGAGCAAAAACGTGATGTGGGATACCAGTAAGAACCGAGTCGTATTGATTG  
ATTTTCGATTGGTCGGGAAGAGATGGTGTGATACGTATCCACCATTATGAATTGTGAAATAGCATGGCCAACAGGAGCCGCGTGTG  
GCGAGCCGCTTCGAGTTGCCCATGATGCGTATTGGATTGTTTCGATAGCTGCCCGATTGACATAAGGCCGAACTTTAAATTTACCGC  
GTAATCTATTACGTTTTATT

>PhCRN06.2\_703 PLHAL7030687

TTTGCTCCCGAAGTCTGTTCTGCGAATATCTACCTAATGGTTGGGTATTCGTCGTAATGGAGCAACTTTTCATTGTGTCCCCTTCGTC  
CACGCCAATGGCATGATAGTTCGTAATCAGCTACTGAAGATCGAAAACACTCTGAAAGATGGATCTTTTCGTCACGGTGATCTTCGG  
GAGCAAAAACGTGATGTGGGATACCAGTAAGAACCGAGTCGTATTGATTGATTTCGATTGGTCGGGAAGAGATGGTGTGATACGTAT  
CCACCATTTATGAATTGTGAAATAGCATGGCCAACAGGAGCCGCGTGTGGCGAGCCGCTTCGAGTTGCCCATGATGCGTATTGGATT  
GTTTCGATAGCTGCCCGATTGACATAAGGCCGAACTTTAAATTTACCGCGTAATCTATTACGTTTTATT

>PhCRN06.2\_710 PLHAL7100727

ATGGTTGGGTATTCGTCGTAATGGAGCAACTTTTCATTGTGTCCCCTTCGTCACGCCAATGGCATGATAGTTCGTAATCAGCTACTGA  
AGATCGAAAACACTCTGAAAGATGGATCTTTTCGTCACGGTGATCTTCGGGAGCAAAAACGTGATGTGGGATACCAGTAAGAACCGAG  
TCGTATTGATTGATTTTCGATTGGTCGGGAAGAGATGGTGTGATACGTATCCACCATTATGAATTGTGAAATAGCATGGCCAACAG  
GAGCCGCGTGTGGCGAGCCGCTTCGAGTTGCCCATGATGCGTATTGGATTGTTTCGATAGCTGCCCGATTGACATAAGGCCGAACTTT  
TAAATTTACCGCGTAATCTATTACGTTTTATT

>PhCRN06.2\_304 PLHAL3041150

GTATTTCGTCGTAATGGAGCAACTTTTCATTGTGTCCCCTTCGTCACGCCAATGGCATGATAGTTCGTAATCAGCTACTGAAGATCGAA  
AACACTCTGAAAGATGGATCTTTTCGTCACGGTGATCTTCGGGAGCAAAAACGTGATGTGGGATACCAGTAAGAACCGAGTCGTATTG  
ATTGATTTTCGATTGGTCGGGAAGAGATGGTGTGATACGTATCCACCATTATGAATTGTGAAATAGCATGGCCAACAGGAGCCGCG  
TGTGGCGAGCCGCTTCGAGTTGCCCATGATGCGTATTGGATTGTTTCGATAGCTGCCCGATTGACATAAGGCCGAACTTTAAATTTA  
CCGCGTAATCTATTACGTTTTATT

>PhCRN06.2\_700 PLHAL7005936

TTTGCTCCCGAAGTCTGTTCTGCGAATATCTACCTAATGGTTGGGTATTCGTCGTAATGGAGCAACTTTTCATTGTGTCCCCTTCGTC  
ACGCCAATGGCATGATAGTTCGTAATCAGCTACTGAAGATCGAAAACACTCTGAAAGATGGATCTTTTCGTCACGGTGATCTTCGGG  
AGCAAAAACGTGATGTGGGATACCAGTAAGAACCGAGTCGTATTGATTGATTTTCGATTGGTCGGGAAGAGATGGTGTGATACGTATC  
CACCATTTATGAATTGTGAAATAGCATGGCCAACAGGAGCCGCGTGTGGCGAGCCGCTTCGAGTTGCCCATGATGCGTATTGGATTG  
TTTCGATAGCTGCCCGATTGACATAAGGCCGAACTTTAAATTTACCGCGTAATCTATTACGTT

>PhCRN06.2\_730 PLHAL7300743

TCGTCGTAATGGAGCAACTTTTCATTGTGTCCCCTTCGTCACGCCAATGGCATGATAGTTCGTAATCAGCTACTGAAGATCGAAAACA  
CTCTGAAAGATGGATCTTTTCGTCACGGTGATCTTCGGGAGCAAAAACGTGATGTGGGATACCAGTAAGAACCGAGTCGTATTGATTG  
ATTTTCGATTGGTCGGGAAGAGATGGTGTGATACGTATCCACCATTATGAATTGTGAAATAGCATGGCCAACAGGAGCCGCGTGTG  
GCGAGCCGCTTCGAGTTGCCCATGATGCGTATTGGATTGTTTCGATAGCTGCCCGATTGACATAAGGCCGAACTTTAAATTTACCGC  
GTAATCTATTACGTTTTATT

>PhCRN06.3\_100 PLHAL100A12992

ACCACCTCAAACGACAGCAAAATTCACGTGCTGGTGGTGGTTCGGAAGGGTGAAAACGACCGCTTCGCAGCCATGGCAATCGGCGTGGC  
ACCCTCTTTGCCACCAACTACAATACACCGGCACCCCGAACGTCTCAAACGATGGGCTGCGATCAATGCAATGATTCGTCAGAAGAA  
TCAAGAGGGCAACCAGAAGACCACGAGTGAAGACGCCAAGAAAACAAAACAAAAGCGGAAAAATCAGATGTCGACAAGACTGTGGG  
CTGTTTCGAGTCTTTGTTGGGAAGATATCAAACCTATTTACCATTTCGACGATCTTTTCGACCTTCAACCAAGCGATATACCTGATG  
CGACTCGAGCTACTCTCGTCTGATTTCTGACTTGGCGAACTCTATGGACAAATTTTCGATGGGAAAGAACGCAAGAGATTGTT  
TTTTATCGCCCCGATCCTTGAGACAGTCAGTCGTCTGCTCAAGAACCTCCGCATATTAGTCGAAGAAGACGTGGTTGGGAAGAACGT  
GCTCCTGAAAGGTCGATTCGAGTTTCGTGCTCAAGCGTGGCACCAGAGAATTTCACTTGTGCAAGCAAAGCGTGAAGATATGCTGCA  
AGGAATGGTTTCAAGATGTGACGGGGCTCGAAGCTCTTGCTGATGTGCAAGATCTTACTGTGACGTATGGCATTTGTGACGAATTTTCT  
CGAGTGGAAAGTTCTTGATCAGTGGCGACGAGAAGGTGAGAGCATGAGACTGTTCTTCTCAAGCGAATACCATACCGTCTGTTTGA  
AGGATTGAAAGAAATTTGGGGAAAATTTACGCGATGCTGCAATAAATATCTTCCATATGAGTTGCAATCCTTTTGTATTATTTCTA  
ATTGAGATCTTCTTACATGCACCCATCTGCTTAATCATGGCATCGAAAAGGTATCTCTGATCGTCCGCTCAACGATAGCACCTAAGAG  
CATCTAGAGTAATCCGTCAAGCTACCGGTGAAACTAAAGAATGAGAGATCAACAGAGCGCGCCGCACCTCCAGGATTGAATCAAG  
TAATATTTGTTTTATTACTGATAAATATAAAGTTAGTAATATACAAAGATGGCGTACTCACCT

>PhCRN06.3\_334 PLHAL3343205

CCAATAACAATACACCGGCACCCCGAACGTCTCAAACGATGGGCTGCGATCAATGCAATGATTCGTCAGAAGAATCAAGAGGCCAAC  
CAGAAGACCACGAGTGAAGACGCCAAGAAAACAAGCAAAAAGCGGAAAAATCACGATGTCGACAAGACTGTGGGCTGTTTCGAGTCTT  
TGTTGGGAAGATATCAAACCTATTTACCCTTCGACGATCTTTTCGACCTTCAACCAAGCGATATACCTGATGCCGACATCGAGCTA  
CTCCTCGCTCGTATTTCGTGACTTGGCGGAACTCTATGGACAAATTTTCGGATGGGAAAGAACCAAGAGATTGTTTTTTATCGCCCCG  
ATCCTTGAGACAGTCAGTCGTCTGCTCAAGAACGTCCGCATATTAGTCGAAGAAGACGTGGTTGGGAAGAAGCGTGCCTTCAAAGGT  
CGATTTCGAGTTTCGTGCTCAAGCGTGGCACCAGAGAATTTCACTTGTGCAAGCAAAGCGTGAAGATATGCTGCAAGGAATGGTTTCAG  
AATGTGACGGGGCTCGAAGCTCTTGTGATGTCGAAGATCTTACTGTGACGTATGGCATTTGTGACGAATTTTTCGAGGTGGAAGTTC  
TTGATCAGTGGGCGACGAGAAGGTGAGAGCATGAGACTGTTCTTCTCAAGCGAATACCATACCGTCTGTTGAAGATTGAAAGAA  
ATTTGGGGAAAATTTACCGGATGCTGCAATAAATATCTTCCATATGAGTTGCAATCCTTTTGTATTATTTCTAAGATTGAGATCTTCT  
TACATGCACCCATCTGCTTAATCATGGCATCGAAAAGGTATCTCTGATCGTCCGCTCAACGATAGCACTTAAAGAGCATCTAGAGTAAT  
CCGTCAAGCTACCGGTGAAACTAAAGAATGAGAGATCAACAGAGCGCGCCGCACCTCCAGGATTGAATCAAGTAATATTTGTTTT  
ATTACTGATAAATATAAAGTTAGTAATATACAAAGATGGCGTACTCACCT

>PhCRN06.3\_703 PLHAL7032740

ACCACCTCAAACGCAGCAAATTCACGTGCTGGTGGTGGTTCGGAAGGGTGAAAAACGACCGCTTCGCAGCCATGGCAATCGGGCGTGGC  
ACCCTCTTTGCCACCAACTACAATACACCGGCACCCCGAACGTCTCAAACGATGGGCTGCGATCAATGCAATGATTCGTCAGAAGAA  
TCAAGAGGGCGAACCCAGAAGACCACGAGTGAAGACGCCAAGAAAAACAAGCAAAAAGCGGAAAAATCACGATGTCGACAAGACTGTGGG  
CTGTTTCGAGTCTTTGTTGGGAAGATATCAAACCTATTTACCACCTTCGACGATTCTTTTCGACCTTCAACCAAGCGATATACCTGATGC  
CGACATCGAGCTACTCCTCGCTCGTATTCGTGACTTGCGGGAACTCTATGGACAAAATTTTCGGATGGGAAAGAAGCCAAGAGATTGTT  
TTTTATCGCCCCGATCCTTGAGACAGTCAGTCGTCTGCTCAAGAACGTCCGCATATTAAGTCGAAGAAGACGTGGTTGGGAAGAAGCT  
GCTCCTGAAAGGTTCGATTTCGAGTTCGTGCTCAAGCGTGGCACCAGAGAATTTCACTTGTGCGAAGCAAAGCGTGAAGATATGCTGCA  
AGGAATGGTTTCAGAATGTGACGGGGCTCGAAGCTCTTGCTGATGTGCAAGATCTTACTGTGACGTATGGCATTGTGACGAATTTTCT  
CGAGTGGAAAGTTCTTGATCAGTGGCGACGAGAAGGTTCAGAGAGCATGAGACTGTTCTTCCCAAGCGAATACCATAACCGTCGTTTGA  
AGGATTGAAAGAAATTTGTGGGGAAAAATTTACGCGATGCTGCAATAAAATATCTTCCATATGAGTTGCAATCCTTTTGTATTATTTCTA  
ATTGAGATCTTCTTACATGCACCCATCTGCTTAATCATGGCATCGAAAGGTATCTCTGATCGTCCGCTCAACGATAGCACTTAAGAG  
CATCTAGAGTAATCCGTCAAGCTACCGGTGAAACTAAAGAATGAGAGATCAACAGAGCGCGCGCCGCACCTCCAGGATTGAATCAAG  
TAATATTTGTTTTATTACTGATAAAATATAAAGTTAGTAATATACAAAGATGGCGTACTCACCT

>PhCRN06.3\_710 PLHAL7102598

ACCACCTCAAACGCAGCAAATTCACGTGCTGGTGGTGGTTCGGAAGGGTGAAAAACGACCGCTTCGCAGCCATGGCAATCGGGCGTGGC  
ACCCTCTTTGCCACCAACTACAATACACCGGCACCCCGAACGTCTCAAACGATGGGCTGCGATCAATGCAATGATTCGTCAGAAGAA  
TCAAGAGGGCGAACCCAGAAGACCACGAGTGAAGACGCCAAGAAAAACAAGCAAAAAGCGGAAAAATCACGATGTCGACAAGACTGTGGG  
CTGTTTCGAGTCTTTGTTGGGAAGATATCAAACCTATTTACCACCTTCGACGATTCTTTTCGACCTTCAACCAAGCGATATACCTGATGC  
CGACATCGAGCTACTCCTCGCTCGTATTCGTGACTTGCGGGAACTCTATGGACAAAATTTTCGGATGGGAAAGAAGCCAAGAGATTGTT  
TTTTATCGCCCCGATCCTTGAGACAGTCAGTCGTCTGCTCAAGAACGTCCGCATATTAAGTCGAAGAAGACGTGGTTGGGAAGAAGCT  
GCTCCTGAAAGGTTCGATTTCGAGTTCGTGCTCAAGCGTGGCACCAGAGAATTTCACTTGTGCGAAGCAAAGCGTGAAGATATGCTGCA  
AGGAATGGTTTCAGAATGTGACGGGGCTCGAAGCTCTTGCTGATGTGCAAGATCTTACTGTGACGTATGGCATTGTGACGAATTTTCT  
CGAGTGGAAAGTTCTTGATCAGTGGCGACGAGAAGGTTCAGAGAGCATGAGACTGTTCTTCCCAAGCGAATACCATAACCGTCGTTTGA  
AGGATTGAAAGAAATTTGTGGGGAAAAATTTACGCGATGCTGCAATAAAATATCTTCCATATGAGTTGCAATCCTTTTGTATTATTTCTA  
ATTGAGATCTTCTTACATGCACCCATCTGCTTAATCATGGCATCGAAAGGTATCTCTGATCGTCCGCTCAACGATAGCACTTAAGAG  
CATCTAGAGTAATCCGTCAAGCTACCGGTGAAACTAAAGAATGAGAGATCAACAGAGCGCGCGCCGCACCTCCAGGATTGAATCAAG  
TAATATTTGTTTTATTACTGATAAAATATAAAGTTAGTAATATACAAAGATGGCGTACTCACCT

>PhCRN06.3\_304 PLHAL3042731

ACCACCTCAAACGCAGCAAATTCACGTGCTGGTGGTGGTTCGGAAGGGTGAAAAACGACCGCTTCGCAGCCATGGCAATCGGGCGTGGC  
ACCCTCTTTGCCACCAACTACAATACACCGGCACCCCGAACGTCTCAAACGATGGGCTGCGATCAATGCAATGATTCGTCAGAAGAA  
TCAAGAGGGCGAACCCAGAAGACCACGAGTGAAGACGCCAAGAAAAACAAGCAAAAAGCGGAAAAATCACGATGTCGACAAGACTGTGGG  
CTGTTTCGAGTCTTTGTTGGGAAGATATCAAACCTATTTACCACCTTCGACGATTCTTTTCGACCTTCAACCAAGCGATATACCTGATGC  
CGACATCGAGCTACTCCTCGCTCGTATTCGTGACTTGCGGGAACTCTATGGACAAAATTTTCGGATGGGAAAGAAGCCAAGAGATTGTT  
TTTTATCGCCCCGATCCTTGAGACAGTCAGTCGTCTGCTCAAGAACGTCCGCATATTAAGTCGAAGAAGACGTGGTTGGGAAGAAGCT  
GCTCCTGAAAGGTTCGATTTCGAGTTCGTGCTCAAGCGTGGCACCAGAGAATTTCACTTGTGCGAAGCAAAGCGTGAAGATATGCTGCA  
AGGAATGGTTTCAGAATGTGACGGGGCTCGAAGCTCTTGCTGATGTGCAAGATCTTACTGTGACGTATGGCATTGTGACGAATTTTCT  
CGAGTGGAAAGTTCTTGATCAGTGGCGACGAGAAGGTTCAGAGAGCATGAGACTGTTCTTCCCAAGCGAATACCATAACCGTCGTTTGA  
AGGATTGAAAGAAATTTGTGGGGAAAAATTTACGCGATGCTGCAATAAAATATCTTCCATATGAGTTGCAATCCTTTTGTATTATTTCTA  
ATTGAGATCTTCTTACATGCACCCATCTGCTTAATCATGGCATCGAAAGGTATCTCTGATCGTCCGCTCAACGATAGCACTTAAGAG  
CATCTAGAGTAATCCGTCAAGCTACCGGTGAAACTAAAGAATGAGAGATCAACAGAGCGCGCGCCGCACCTCCAGGATTGAATCAAG  
TAATATTTGTTTTATTACTGATAAAATATAAAGTTAGTAATATACAAAGATGGCGTACTCACCT

>PhCRN06.3\_700 PLHAL7003619

TCGCAGCCATGGCAATCGGGCGTACCCTCTTTGCCACCAACTACAATACACCGGCACCCCGAACGTCTCAAACGATGGGCTGCGA  
TCAATGCAATGATTCGTCAGAAGAAATCAAGAGCGAACCCAGAAGACCACGAGTGAAGACGCCAAGAAAAACAAGCAAAAAGCGGAAAA  
ATCACGATGTCGACCAAGACTGTGGGCTGTTTCGAGTCTTTGTTGGGAAGATATCAAACCTATTTACCACCTTCGACGATTCTTTTCGACC  
TTCAACCAAGCGATATACCTGATGCCGACATCGAGTACTCCTCGCTCGTATTCGTGACTTGCGGGAACTCTATGGACAAAATTTTCGG  
ATGGGAAAGAAGCCAAGAGATTGTTTTTTATCGCCCCGATCCTTGAGACAGTCAGTCGTCTGCTCAAGAACGTCCGCATATTAAGTCG  
AAGAAGACGTGGTTGGGAAGAAGCTGCTCCTGAAAGGTTCGATTTCGAGTTCGTGCTCAAGCGTGGCACCAGAGAATTTCACTTGTGCG  
AAGCAAAGCGTGAAGATATGCTGCAAGGAATGGTTTCAGAATGTGACGGGGCTCGAAGCTCTTGTGATGTGCAAGATCTTACTGTGA  
CGTATGGCATTGTGACGAATTTTCTCGAGTGGAAAGTTCTTGATCAGTGGCGACGAGAAGGTTCAGAGAGCATGAGACTGTTCTTCCCTC  
AAGCGAATACCATAACCGTCGTTTGAAGGATTGAAAGAAATTTGTGGGGAAAAATTTACGCGATGCTGCAATAAAATATCTTCCATATGAG  
TTGCAATCCTTTTGTATTATTTCTAATTGAGATCTTCTTACATGCACCCATCTGCTTAATCATGGCATCGAAAGGTATCTCTGATCG  
TCCGCTCAACGATAGCACTTAAGAGCATCTAGAGTAATCCGTCAAGCTACCGGTGAAACTAAAGAATGAGAGATCAACAGAGCGCGC  
GCCGCACCTCCAGGATTGAATCAAGTAATATTTGTTTTATTACTGATAAAATATAAAGTTAGTAATATACAAAGATGGCGTACTCACCT  
T

>PhCRN06.3\_730 PLHAL7302988

ACCACCTCAAACGCAGCAAATTCACGTGCTGGTGGTGGTTCGGAAGGGTGAAAAACGACCGCTTCGCAGCCATGGCAATCGGGCGTGGC  
ACCCTCTTTGCCACCAACTACAATACACCGGCACCCCGAACGTCTCAAACGATGGGCTGCGATCAATGCAATGATTCGTCAGAAGAA  
TCAAGAGGGCGAACCCAGAAGACCACGAGTGAAGACGCCAAGAAAAACAAGCAAAAAGCGGAAAAATCACGATGTCGACAAGACTGTGGG  
CTGTTTCGAGTCTTTGTTGGGAAGATATCAAACCTATTTACCACCTTCGACGATTCTTTTCGACCTTCAACCAAGCGATATACCTGATGC  
CGACATCGAGCTACTCCTCGCTCGTATTCGTGACTTGCGGGAACTCTATGGACAAAATTTTCGGATGGGAAAGAAGCCAAGAGATTGTT  
TTTTATCGCCCCGATCCTTGAGACAGTCAGTCGTCTGCTCAAGAACGTCCGCATATTAAGTCGAAGAAGACGTGGTTGGGAAGAAGCT  
GCTCCTGAAAGGTTCGATTTCGAGTTCGTGCTCAAGCGTGGCACCAGAGAATTTCACTTGTGCGAAGCAAAGCGTGAAGATATGCTGCA  
AGGAATGGTTTCAGAATGTGACGGGGCTCGAAGCTCTTGCTGATGTGCAAGATCTTACTGTGACGTATGGCATTGTGACGAATTTTCT  
CGAGTGGAAAGTTCTTGATCAGTGGCGACGAGAAGGTTCAGAGAGCATGAGACTGTTCTTCCCAAGCGAATACCATAACCGTCGTTTGA  
AGGATTGAAAGAAATTTGTGGGGAAAAATTTACGCGATGCTGCAATAAAATATCTTCCATATGAGTTGCAATCCTTTTGTATTATTTCTA



ATTGAGATCTTCTTACATGCACCCATCTGCTTAATCATGGCATCGAAAAGGTATCTCTGATCGTCCGCTCAACGATAGCACCTAAGAG  
CATCTAGAGTAATCCGTCAAGCTACCGGTGAAACTAAAGAATGAGAGATCAACAGAGCGCGCGCCGCACCTCCAGGATTGAATCAAG  
TAATATTTGTTTTATTACTGATAAATATAAAGTTAGTAATATACAAAGATGGCGTACTCACCT

>PhCRN07.1\_100 PLHAL100A12992

ACCACCTCAAACGCAGCAAATTCACGTGCTGGTGGTGGTTCGGAAGGGTGAAAAACGACCGCTTCGCAGCCATGGCAATCGGCGTGCC  
ACCCTCTTTGCCACCAACTACAATACACCGGCACCCCGAACGTCTCAAACGATGGGCTGCGATCAATGCAATGATTTCGTGAGAAGAA  
TCAAGAGGGCGAACCCAGAAGACCACGAGTGAAGACGCCAAGAAAAACAACAAAAAGCGGAAAAATCACGATGTCGACAAGACTGTGGG  
CTGTTTCGAGTCTTTGTTGGGAAGATATCAAACCTATTTACCACTTCGACGATTTCTTCGACCTTCAACCAAGCGATATACCTGATGC  
CGACATCGAGCTACTCCTCGCTCGTATTCGTGACTTGCGGGAACCTATGGACAAAATTTTCGATGGGAAAGAAGCCAAGAGATTGTT  
TTTTATCGCCCCGATCCTTGAGACAGTCAGTCGTCTGCTCAAGAACGTCCGCATATTAGTTCGAAGAAGACGTTGGTGGGAAGAAGCGT  
GCTCCTGAAAGGTTCGATTTCGAGTTCGTGCTCAAGCGTGGCACCAGAGAATTTCACTTGTTCGAAGCAAAGCGTGAAGATATGCTGCA  
AGGAATGGTTTTCGAATGTGACGGGGCTCGAAGCTCTTGCTGATGTTCGAAGATCTTACTGTGACGTATGGCATTGTGACGAATTTTCT  
CGAGTGGAAAGTTCTTGATCAGTGGCGACGAGAAGGTTCAGAGAGCATGAGACTGTTCTTCTCAAGCGAATACCATACCGTTCGTTTTGA  
AGGATTGAAAGAAATTTGTGGGGAAAAATTTACGCGATGCTGCAATAAAATATCTTCCATATGAGTTGCAATCCTTTTGTATTATTTCTA  
ATTGAGATCTTCTTACATGCACCCATCTGCTTAATCATGGCATCGAAAAGGTATCTCTGATCGTCCGCTCAACGATAGCACCTAAGAG  
CATCTAGAGTAATCCGTCAAGCTACCGGTGAAACTAAAGAATGAGAGATCAACAGAGCGCGCGCCGCACCTCCAGGATTGAATCAAG  
TAATATTTGTTTTATTACTGATAAATATAAAGTTAGTAATATACAAAGATGGCGTACTCACCT

>PhCRN07.1\_334 PLHAL3343205

CCAACCTACAATACACCGGCACCCCGAACGTCTCAAACGATGGGCTGCGATCAATGCAATGATTTCGTGAGAAGAATCAAGAGGGCAAC  
CAGAAGACCACGAGTGAAGACGCCAAGAAAAACAAGCAAAAAGCGGAAAAATCACGATGTCGACAAGACTGTGGGCTGTTTCGAGTCTT  
TGTTGGGAAGATATCAAACCTATTTACCACTTCGACGATTTCTTCGACCTTCAACCAAGCGATATACCTGATGCCGACATCGAGCTA  
CTCCTCGCTCGTATTCGTGACTTGCGGGAACCTCTATGGACAAAATTTTCGATGGGAAAGAAGCCAAGAGATTGTTTTTTATCGCCCCG  
ATCCTTGAGACAGTCAGTCGTCTGCTCAAGAACGTCCGCATATTAGTTCGAAGAAGACGTTGGTGGGAAGAAGCTGCTCCTGAAAGGT  
CGATTTCGAGTTCGTGCTCAAGCGTGGCACCAGAGAATTTCACTTGTTCGAAGCAAAGCGTGAAGATATGCTGCAAGGAATGGTTCAG  
AATGTGACGGGGCTCGAAGCTCTTGCTGATGTTCGAAGATCTTACTGTGACGTATGGCATTGTGACGAATTTTCTCGAGTGGAAAGTTC  
TTGATCAGTGGCGACGAGAAGGTTCAGAGAGCATGAGACTGTTCTTCTCAAGCGAATACCATACCGTTCGTTTTGAAGGATTGAAAGAA  
ATTGTGGGGAAAAATTTACGCGATGCTGCAATAAAATCTTCCATATGAGTTGCAATCCTTTTGTATTATTTCTAATTGAGATCTTCT  
TACATGCACCCATCTGCTTAATCATGGCATCGAAAAGGTATCTGATCGTCCGCTCAACGATAGCACCTAAGAGCATCTAGAGTAAT  
CCGTCAAGCTACCGGTGAAACTAAAGAATGAGAGATCAACAGAGCGCGCGCCGCACCTCCAGGATTGAATCAAGTAATATTTGTTTT  
ATTACTGATAAATATAAAGTTAGTAATATACAAAGATGGCGTACTCACCT

>PhCRN07.1\_703 PLHAL7032740

ACCACCTCAAACGCAGCAAATTCACGTGCTGGTGGTGGTTCGGAAGGGTGAAAAACGACCGCTTCGCAGCCATGGCAATCGGCGTGCC  
ACCCTCTTTGCCACCAACTACAATACACCGGCACCCCGAACGTCTCAAACGATGGGCTGCGATCAATGCAATGATTTCGTGAGAAGAA  
TCAAGAGGGCGAACCCAGAAGACCACGAGTGAAGACGCCAAGAAAAACAAGCAAAAAGCGGAAAAATCACGATGTCGACAAGACTGTGGG  
CTGTTTCGAGTCTTTGTTGGGAAGATATCAAACCTATTTACCACTTCGACGATTTCTTCGACCTTCAACCAAGCGATATACCTGATGC  
CGACATCGAGCTACTCCTCGCTCGTATTCGTGACTTGCGGGAACCTATGGACAAAATTTTCGATGGGAAAGAAGCCAAGAGATTGTT  
TTTTATCGCCCCGATCCTTGAGACAGTCAGTCGTCTGCTCAAGAACGTCCGCATATTAGTTCGAAGAAGACGTTGGTGGGAAGAAGCGT  
GCTCCTGAAAGGTTCGATTTCGAGTTCGTGCTCAAGCGTGGCACCAGAGAATTTCACTTGTTCGAAGCAAAGCGTGAAGATATGCTGCA  
AGGAATGGTTTTCGAATGTGACGGGGCTCGAAGCTCTTGCTGATGTTCGAAGATCTTACTGTGACGTATGGCATTGTGACGAATTTTCT  
CGAGTGGAAAGTTCTTGATCAGTGGCGACGAGAAGGTTCAGAGAGCATGAGACTGTTCTTCTCAAGCGAATACCATACCGTTCGTTTTGA  
AGGATTGAAAGAAATTTGTGGGGAAAAATTTACGCGATGCTGCAATAAAATATCTTCCATATGAGTTGCAATCCTTTTGTATTATTTCTA  
ATTGAGATCTTCTTACATGCACCCATCTGCTTAATCATGGCATCGAAAAGGTATCTCTGATCGTCCGCTCAACGATAGCACCTAAGAG  
CATCTAGAGTAATCCGTCAAGCTACCGGTGAAACTAAAGAATGAGAGATCAACAGAGCGCGCGCCGCACCTCCAGGATTGAATCAAG  
TAATATTTGTTTTATTACTGATAAATATAAAGTTAGTAATATACAAAGATGGCGTACTCACCT

>PhCRN07.1\_710 PLHAL7102598

ACCACCTCAAACGCAGCAAATTCACGTGCTGGTGGTGGTTCGGAAGGGTGAAAAACGACCGCTTCGCAGCCATGGCAATCGGCGTGCC  
ACCCTCTTTGCCACCAACTACAATACACCGGCACCCCGAACGTCTCAAACGATGGGCTGCGATCAATGCAATGATTTCGTGAGAAGAA  
TCAAGAGGGCGAACCCAGAAGACCACGAGTGAAGACGCCAAGAAAAACAAGCAAAAAGCGGAAAAATCACGATGTCGACAAGACTGTGGG  
CTGTTTCGAGTCTTTGTTGGGAAGATATCAAACCTATTTACCACTTCGACGATTTCTTCGACCTTCAACCAAGCGATATACCTGATGC  
CGACATCGAGCTACTCCTCGCTCGTATTCGTGACTTGCGGGAACCTATGGACAAAATTTTCGATGGGAAAGAAGCCAAGAGATTGTT  
TTTTATCGCCCCGATCCTTGAGACAGTCAGTCGTCTGCTCAAGAACGTCCGCATATTAGTTCGAAGAAGACGTTGGTGGGAAGAAGCGT  
GCTCCTGAAAGGTTCGATTTCGAGTTCGTGCTCAAGCGTGGCACCAGAGAATTTCACTTGTTCGAAGCAAAGCGTGAAGATATGCTGCA  
AGGAATGGTTTTCGAATGTGACGGGGCTCGAAGCTCTTGCTGATGTTCGAAGATCTTACTGTGACGTATGGCATTGTGACGAATTTTCT  
CGAGTGGAAAGTTCTTGATCAGTGGCGACGAGAAGGTTCAGAGAGCATGAGACTGTTCTTCTCAAGCGAATACCATACCGTTCGTTTTGA  
AGGATTGAAAGAAATTTGTGGGGAAAAATTTACGCGATGCTGCAATAAAATATCTTCCATATGAGTTGCAATCCTTTTGTATTATTTCTA  
ATTGAGATCTTCTTACATGCACCCATCTGCTTAATCATGGCATCGAAAAGGTATCTCTGATCGTCCGCTCAACGATAGCACCTAAGAG  
CATCTAGAGTAATCCGTCAAGCTACCGGTGAAACTAAAGAATGAGAGATCAACAGAGCGCGCGCCGCACCTCCAGGATTGAATCAAG  
TAATATTTGTTTTATTACTGATAAATATAAAGTTAGTAATATACAAAGATGGCGTACTCACCT

>PhCRN07.1\_304 PLHAL3042731

ACCACCTCAAACGCAGCAAATTCACGTGCTGGTGGTGGTTCGGAAGGGTGAAAAACGACCGCTTCGCAGCCATGGCAATCGGCGTGCC  
ACCCTCTTTGCCACCAACTACAATACACCGGCACCCCGAACGTCTCAAACGATGGGCTGCGATCAATGCAATGATTTCGTGAGAAGAA  
TCAAGAGGGCGAACCCAGAAGACCACGAGTGAAGACGCCAAGAAAAACAAGCAAAAAGCGGAAAAATCACGATGTCGACAAGACTGTGGG  
CTGTTTCGAGTCTTTGTTGGGAAGATATCAAACCTATTTACCACTTCGACGATTTCTTCGACCTTCAACCAAGCGATATACCTGATGC  
CGACATCGAGCTACTCCTCGCTCGTATTCGTGACTTGCGGGAACCTATGGACAAAATTTTCGATGGGAAAGAAGCCAAGAGATTGTT  
TTTTATCGCCCCGATCCTTGAGACAGTCAGTCGTCTGCTCAAGAACGTCCGCATATTAGTTCGAAGAAGACGTTGGTGGGAAGAAGCGT  
GCTCCTGAAAGGTTCGATTTCGAGTTCGTGCTCAAGCGTGGCACCAGAGAATTTCACTTGTTCGAAGCAAAGCGTGAAGATATGCTGCA  
AGGAATGGTTTTCGAATGTGACGGGGCTCGAAGCTCTTGCTGATGTTCGAAGATCTTACTGTGACGTATGGCATTGTGACGAATTTTCT  
CGAGTGGAAAGTTCTTGATCAGTGGCGACGAGAAGGTTCAGAGAGCATGAGACTGTTCTTCTCAAGCGAATACCATACCGTTCGTTTTGA  
AGGATTGAAAGAAATTTGTGGGGAAAAATTTACGCGATGCTGCAATAAAATATCTTCCATATGAGTTGCAATCCTTTTGTATTATTTCTA  
ATTGAGATCTTCTTACATGCACCCATCTGCTTAATCATGGCATCGAAAAGGTATCTCTGATCGTCCGCTCAACGATAGCACCTAAGAG  
CATCTAGAGTAATCCGTCAAGCTACCGGTGAAACTAAAGAATGAGAGATCAACAGAGCGCGCGCCGCACCTCCAGGATTGAATCAAG  
TAATATTTGTTTTATTACTGATAAATATAAAGTTAGTAATATACAAAGATGGCGTACTCACCT

AGGAATGGTTTCAGAATGTGACGGGGCTCGAAGCTCTTGCTGATGTGCAAGATCTTACTGTGACGTATGGCATTGTGACGAATTTTCT  
CGAGTGGAAAGTTCTTGATCAGTGGCGACGAGAAGGTCAGAGAGCATGAGACTGTTCTTCTCAAGCGAATACCATACCGTCGTTTTGA  
AGGATTGAAAGAAATTTGTGGGAAAATTTACGCGATGCTGCAATAAATATCTTCCATATGAGTTGCAATCCTTTTGTATTATTTCTA  
ATTGAGATCTTCTTACATGCACCCATCTGCTTAATCATGGCATCGAAAGGTATCTCTGATCGTCCGCTCAACGATAGCACTTAAGAG  
CATCTAGAGTAATCCGTCAAGCTACCGGTGAAACTAAAAGATGAGAGATCAACAGAGCGCGCGCCGCACCTCCAGGATTGAATCAAG  
TAATATTTGTTTTATTACTGATAAATATAAAGTTAGTAATATACAAAGATGGCGTACTCACCT

>PhCRN07.1\_700 PLHAL7003619

TCGCAGCCATGGCAATCGGCGTGGCACCTCTTTGCCACCAACTACAATACACCGGCACCCCGAACGTCTCAAACGATGGGCTGCGA  
TCAATGCAATGATTTCGTCAGAAGAATCAAGAGGCGAACCAGAAGACCACGAGTGAAGACGCCAAGAAAACAAGCAAAAAGCGGAAAA  
ATCACGATGTGACAAAGACTGTGGGCTGTTTCGAGTCTTTGTTGGGAAGATATCAAACCTATTTACCACCTTCGACGATTTTCGACC  
TTCAACCAAGCGATATACCTGATGCCGACATCGAGCTACTCCTCGCTCGTATTCGTGACTTGCGGGAACCTATGGACAAAATTTTCGG  
ATGGGAAAAGAAGCCAAGAGATTGTTTTTATCGCCCCGATCCTTGAGACAGTCAGTCGTCTGCTCAAGAACGTCCGCATATTAGTCG  
AAGAAGACGTGGTTGGGAAGAACGTGCTCCTGAAAGGTCGATTTCGAGTTCGTGCTCAAGCGTGGCACCAAGAGAATTTCACTTGTGCG  
AAGCAAAGCGTGAAGATATGCTGCAAGGAATGGTTTCAGAATGTGACGGGGCTCGAAGCTCTTGCTGATGTGCAAGATCTTACTGTGA  
CGTATGGCATTGTGACGAATTTTCTCGAGTGGAAAGTTCTTGATCAGTGGCGACGAGAAGGTCAGAGAGCATGAGACTGTTCTTCCCTC  
AAGCGAATACCATACCGTCGTTTGAAGGATTGAAAGAAAATTTACGCGATGCTGCAATAAATATCTTCCATATGAG  
TTGCAATCCTTTTGTATTATTTCTAATTGAGATCTTCTTACATGCACCCATCTGCTTAATCATGGCATCGAAAGGTATCTCTGATCG  
TCCGCTCAACGATAGCACTTAAGAGCATCTAGAGTAATCCGTCAAGCTACCGGTGAAACTAAAAGATGAGAGATCAACAGAGCGCGC  
GCCGCACCTCCAGGATTGAATCAAGTAATATTTGTTTTATTACTGATAAATATAAAGTTAGTAATATACAAAGATGGCGTACTCACCT  
T

>PhCRN07.1\_730 PLHAL7302988

ACCACCTCAAACGACGCAAAATTCACGTGCTGGTGGTGGTTCCGAAGGGTGAAAACGACCGCTTCGCAGCCATGGCAATCGGCGTGGC  
ACCCTCTTTGCCACCAACTACAATACACCGGCACCCCGAACGTCTCAAACGATGGGCTGCGATCAATGCAATGATTTCGTCAGAAGAA  
TCAAGAGGGCAACCAGAAGACCACGAGTGAAGACGCCAAGAAAACAAGCAAAAAGCGGAAAAATCACGATGTGACAAAGACTGTGGG  
CTGTTTCGAGTCTTTGTTGGGAAGATATCAAACCTATTTACCACCTTCGACGATTTCTTTCGACCTTCAACCAAGCGATATACCTGATGC  
CGACATCGAGCTACTCCTCGCTCGTATTCGTGACTTGCGGGAACCTATGGACAAAATTTTCGGATGGGAAAAGAAGCCAAGAGATTGTT  
TTTTATCGCCCCGATCCTTGAGACAGTCAGTCGTCTGCTCAAGAACGTCCGCATATTAGTCGAAGAAGACGTGGTTGGGAAGAAGCT  
GCTCCTGAAAGGTCGATTCGAGTTCGTGCTCAAGCGTGGCACCAAGAGAATTTCACTTGTGCAAGCAAAGCGTGAAGATATGCTGCA  
AGGAATGGTTTCAGAATGTGACGGGGCTCGAAGCTCTTGCTGATGTCGAAGATCTTACTGTGACGTATGGCATTTGTGACGAATTTTCT  
CGAGTGGAAAGTTCTTGATCAGTGGCGACGAGAAGGTCAGAGAGCATGAGACTGTTCTTCTCAAGCGAATACCATACCGTCGTTTTGA  
AGGATTGAAAGAAATTTGTGGGAAAATTTACGCGATGCTGCAATAAATATCTTCCATATGAGTTGCAATCCTTTTGTATTATTTCTA  
ATTGAGATCTTCTTACATGCACCCATCTGCTTAATCATGGCATCGAAAGGTATCTCTGATCGTCCGCTCAACGATAGCACTTAAGAG  
CATCTAGAGTAATCCGTCAAGCTACCGGTGAAACTAAAAGATGAGAGATCAACAGAGCGCGCGCCGCACCTCCAGGATTGAATCAAG  
TAATATTTGTTTTATTACTGATAAATATAAAGTTAGTAATATACAAAGATGGCGTACTCACCT

>PhCRN07.2\_100 PLHAL100A11029

ACCCCTTTTGCCACCAACTACACTACACCGTCACCCCGAACGTCTCAGACGATGGGCTGCGATCAATGCAATGATTTCGCCAGAAGAA  
TCAAGACGCGAACCAGAAGACGACGACTAAAGACGCCAAAAACACAAACAAGAAGCGGAAAAATCACGATATCGACAAGTCCGTGGG  
CTATTTCGACTCTTTGCTGGGAAGACATCAAACCTATTTACAACCTTCGACTATTCTTACGAACTTCAACCAAGCGATATTCCTGATGC  
CGACATCGAGCTACTCCTCGCTCGTATTCGTGACTTGCGGGAACCTATGGACGAATCTCCGATGGAAATGAAGCCAAGAGATTGTT  
TTTTATCGCCCCAATCCTTGAGACAGTCAGTCGTCTGCTCGGGGACGTCCGCATACTCGTTCGAAGAAGACGTGGTTGGAAGGTACGT  
GCTCCTGAAAGGTCGATTTCGAGTTCGTGCTCAAGCGTGGCACCAAGAGAATTTCAATTTGTCGAAGCGAAACGTGAAGATATGCTGCA  
GGGAGTGGTTTCAGAATGTGACGGGGCTGGAAGCGCTGGCTGATGTGCAAGATCTTACTGTGACGTATGGCATTGTGACGAATTTTCT  
CGAGTGGAAAGTTCTTGATCAGTGGCGACGAGAAGGTCAGAGAGCATGAGACTGTTCTTCTCAAGCGAATACCATACCGTCGTTTTGA  
AGGATTGAAAGATATCGTCGGGAAGATTTAC

>PhCRN07.2\_334 PLHAL3341142

ACCCCTTTTGCCACCAACTACACTACACCGTCACCCCGAACGTCTCAGACGATGGGCTGCGATCAATGCAATGATTTCGCCAGAAGAA  
TCAAGACGCGAACCAGAAGACGACGACTAAAGACGCCAAAAACACAAACAAGAAGCGGAAAAATCACGATATCGACAAGTCCGTGGG  
CTATTTCGACTCTTTGCTGGGAAGACATCAAACCTATTTACAACCTTCGACTATTCTTACGAACTTCAACCAAGCGATATTCCTGATGC  
CGACATCGAGCTACTCCTCGCTCGTATTCGTGACTTGCGGGAACCTATGGACGAATCTCCGATGGAAATGAAGCCAAGAGATTGTT  
TTTTATCGCCCCAATCCTTGAGACAGTCAGTCGTCTGCTCGGGGACGTCCGCATACTCGTTCGAAGAAGACGTGGTTGGAAGGTACGT  
GCTCCTGAAAGGTCGATTTCGAGTTCGTGCTCAAGCGTGGCACCAAGAGAATTT

>PhCRN07.2\_703 PLHAL7031064

ACCCCTTTTGCCACCAACTACACTACACCGTCACCCCGAACGTCTCAGACGATGGGCTGCGATCAATGCAATGATTTCGCCAGAAGAA  
TCAAGACGCGAACCAGAAGACGACGACTAAAGACGCCAAAAACACAAACAAGAAGCGGAAAAATCACGATATCGACAAGTCCGTGGG  
CTATTTCGACTCTTTGCTGGGAAGACATCAAACCTATTTACAACCTTCGACTATTCTTACGAACTTCAACCAAGCGATATTCCTGATGC  
CGACATCGAGCTACTCCTCGCTCGTATTCGTGACTTGCGGGAACCTATGGACGAATCTCCGATGGAAATGAAGCCAAGAGATTGTT  
TTTTATCGCCCCAATCCTTGAGACAGTCAGTCTCAAGGATTGGCAGTCAGTCGTCTGCTCGGGGACGTCCGCATACTCGTTCGAAGAA  
GACGTGGTTGGAAGGTACGTGCTCCTGAAAGGTCGATTTCGAGTTCGTGCTCAAGCGTGGCACCAAGAGAATTTCAATTTGTCGAAGCG  
AAACGTGAAGATATGCTGCAGGGAGTGGTTTCAGAATGTGACGGGGCTGGAAGCGCTGGCTGATGTGCAAGATCTTACTGTGACGTAT  
GGCATTGTGACGAATTTTCTCGAGTGGAAAGTTCTTGATCAGTGGCGACGAGAAGGTCAGAGAGCATGAGACTGTTCTTCTCATCAAGCG  
AATACCATACCGTCGTTTTGAAGGATTGAAAGATATCGTCGGGAAGATTTAC

>PhCRN07.2\_710 PLHAL7100977

ACCCCTTTTGCCACCAACTACACTACACCGTCACCCCGAACGTCTCAGACGATGGGCTGCGATCAATGCAATGATTTCGCCAGAAGAA  
TCAAGACGCGAACCAGAAGACGACGACTAAAGACGCCAAAAACACAAACAAGAAGCGGAAAAATCACGATATCGACAAGTCCGTGGG  
CTATTTCGACTCTTTGCTGGGAAGACATCAAACCTATTTACAACCTTCGACTATTCTTACGAACTTCAACCAAGCGATATTCCTGATGC  
CGACATCGAGCTACTCCTCGCTCGTATTCGTGACTTGCGGGAACCTATGGACGAATCTCCGATGGAAATGAAGCCAAGAGATTGTT

TTTTATCGCCCCAATCCTTGAGACAGTCAGTCGTCTGCTCGGGGACGTCCGCATACTCGTCGAAGAAGACGTGGTTGGAAGGTACGT  
GCTCCTGAAAGGTTCGATTCGAGTTCGTGCTCAAGCGTGGCACCAAGAGAATTTCAATTGTCCAAGCGAAAACGTGAAGATATGCTGCA  
GGGAGTGGTTTCAAGATGTGACGGGGCTGGAAGCGCTGGCTGATGTGCAAGATCTTACTGTGACGTATGGCATTGTGACGAATTTTCT  
CGAGTGAAGTTCTTGATCAGTGGCGACGAGAAGGTCCGAGAGCATGAGACTGTTCTTCATCAAGCGAATACCATACCGTCGTTTTGA  
AGGATTGAAAGATATCGTCGGGAAGATTTAC

>PhCRN07.2\_304 PLHAL3041074

ACCCCTTTGCCACCAACTACACTACACCGTCACCCCGAACGTCTCAGACGATGGGCTGCGATCAATGCAATGATTCGCCAGAAGAA  
TCAAGACGCGAACCAAGACGACGACTAAAGACGCCAAAAACACAAACAAGAAAGCGGGAAAAATCACGATATCGACAAGTCCGTGGG  
CTATTTCGACTCTTTGCTGGGAAGACATCAAACCTATTTACAACCTTCGACTATTTTACGAACTTCAACCAAGCGATATTCCTGATGC  
CGACATCGAGCTACTCCTCGCTCGTATTCGTGACTTTCGGGAACTCTATGGACGAATCTCCGATGGAAATGAAGCCAAGAGATTGTT  
TTTTATCGCCCCAATCCTTGAGACAGTCAGTCGTCTGCTCGGGGACGTCCGCATACTCGTCGAAGAAGACGTGGTTGGAAGGTACGT  
GCTCCTGAAAGGTTCGATTCGAGTTCGTGCTCAAGCGTGGCACCAAGAGAATTTCAATTGTGCAAGCGAAAACGTGAAGATATGCTGCA  
GGGAGTGGTTTCAAGATGTGACGGGGCTGGAAGCGCTGGCTGATGTGCAAGATCTTACTGTGACGTATGGCATTGTGACGAATTTTCT  
CGAGTGAAGTTCTTGATCAGTGGCGACGAGAAGGTCCGAGAGCATGAGACTGTTCTTCATCAAGCGAATACCATACCGTCGTTTTGA  
AGGATTGAAAGATATCGTCGGGAAGATTTAC

>PhCRN07.2\_700 PLHAL7001355

ACCCCTTTGCCACCAACTACACTACACCGTCACCCCGAACGTCTCAGACGATGGGCTGCGATCAATGCAATGATTCGCCAGAAGAA  
TCAAGACGCGAACCAAGACGACGACTAAAGACGCCAAAAACACAAACAAGAAAGCGGGAAAAATCACGATATCGACAAGTCCGTGGG  
CTATTTCGACTCTTTGCTGGGAAGACATCAAACCTATTTACAACCTTCGACTATTTTACGAACTTCAACCAAGCGATATTCCTGATGC  
CGACATCGAGCTACTCCTCGCTCGTATTCGTGACTTTCGGGAACTCTATGGACGAATCTCCGATGGAAATGAAGCCAAGAGATTGTT  
TTTTATCGCCCCAATCCTTGAGACAGTCAGTCCTCAAGGATTGGCAGTCAGTCGTCTGCTCGGGGACGTCCGCATACTCGTCGAAGAA  
GACGTGGTTGGAAGGTACGTGCTCCTGAAAGGTTCGATTCGAGTTCGTGCTCAAGCGTGGCACCAAGAGAATTT

>PhCRN07.2\_730 PLHAL7301096

ACCCCTTTGCCACCAACTACACTACACCGTCACCCCGAACGTCTCAGACGATGGGCTGCGATCAATGCAATGATTCGCCAGAAGAA  
TCAAGACGCGAACCAAGACGACGACTAAAGACGCCAAAAACACAAACAAGAAAGCGGGAAAAATCACGATATCGACAAGTCCGTGGG  
CTATTTCGACTCTTTGCTGGGAAGACATCAAACCTATTTACAACCTTCGACTATTTTACGAACTTCAACCAAGCGATATTCCTGATGC  
CGACATCGAGCTACTCCTCGCTCGTATTCGTGACTTTCGGGAACTCTATGGACGAATCTCCGATGGAAATGAAGCCAAGAGATTGTT  
TTTTATCGCCCCAATCCTTGAGACAGTCAGTCGTCTGCTCGGGGACGTCCGCATACTCGTCGAAGAAGACGTGGTTGGAAGGTACGT  
GCTCCTGAAAGGTTCGATTCGAGTTCGTGCTCAAGCGTGGCACCAAGAGAATTTCAATTGTGCAAGCGAAAACGTGAAGATATGCTGCA  
GGGAGTGGTTTCAAGATGTGACGGGGCTGGAAGCGCTGGCTGATGTGCAAGATCTTACTGTGACGTATGGCATTGTGACGAATTTTCT  
CGAGTGAAGTTCTTGATCAGTGGCGACGAGAAGGTCCGAGAGCATGAGACTGTTCTTCATCAAGCGAATACCATACCGTCGTTTTGA  
AGGATTGAAAGATATCGTCGGGAAGATTTAC

>PhCRN07.3\_100 PLHAL100A12424

CGGCGTGAGACCCCCTTTGCCACCAACTACACTACACCGTCACGTCTCAGACGATGGGCTGCGATCAATGCAATGATTCGCCAGAAG  
AATCAAGACGCGAACCAAGACGACGACTGAAGACGCCAAGAACACAAACAAGAAAGCGGAAAAAACACGATATCGACAAGTCCGTG  
GGCTATTTCGACTCTTTGTTGGGAAGACATCAAACCTATTTACAACCTTCGACGATTTTACGAACTTCAACCAAGCGATATTCCTGAT  
GCCGACATCGAGCTACTCCTCGCTCGTATTCGTGATTTGCGGGAACCTCTATGGAAAAATCTCCAATGGAAAAGAAGCCAAGCGATTG  
ATTTTTATCGCCCCAATCCTTGAGACAGTCAGTCGTCTGCTCGGGGACTTCCGCATACTCGTCGAAGAAGACGTGGTTGAAAGGTAC  
GTGCTCCTGAAAGGTTCGATTCGAGTTCGTGCTCAAGCGTGGCACCAAGAGAATTTCAATTGTGCAAGCGAAAACGTGAAGATATGCTG  
CAGGGAGTGGTTTCAAGATGTGACGGGGCTGGAAGCGCTGGCTGATGTGCAAGATCTTACTGTGACGTATGGCATTGTGACGAATTTT  
CTCGAGTGAAGTCTTGATCAGTGGCGACGAGAAGGTCCGAGAGCATGAGACTGTTCTTTCTCAAGCGAATACCATACCGTCGTTTTG  
AAGGATTGAAAGAGATCGTCGGGAAGATTTA

>PhCRN07.3\_334 PLHAL3342569

ACCCCTTTGCCACCAACTACACTACACCGTCACGTCTCAGACGATGGGCTGCGATCAATGCAATGATTCGCCAGAAGAAATCAAGAC  
GCGAACCAAGACGACGACTGAAGACGCCAAGAACACAAACAAGAAAGCGGAAAAAACACGATATCGACAAGTCCGTGGGCTATTTCG  
ACTCTTTGTTGGGAAGACATCAAACCTATTTACAACCTTCGACGATTTTACGAACTTCAACCAAGCGATATTCCTGATGCCGACATC  
GAGCTACTCCTCGCTCGTATTCGTGATTTGCGGGAACCTCTATGGAAAAATCTCCAATGGAAAAGAAGCCAAGCGATTGATTTTTATC  
GCCCAATCCTTGAGACAGTCAGTCGTCTGCTCGGGGACTTCCGCATACTCGTCGAAGAAGACGTGGTTGAAAGGTACGTGCTCCTG  
AAAGGTTCGATTTCGAGTTCGTGCTCAAGCGTGGCACCAAGAGAATTT

>PhCRN07.3\_703 PLHAL7032169

CGGCGTGAGACCCCCTTTGCCACCAACTACACTACACCGTCACGTCTCAGACGATGGGCTGCGATCAATGCAATGATTCGCCAGAAG  
AATCAAGACGCGAACCAAGACGACGACTGAAGACGCCAAGAACACAAACAAGAAAGCGGAAAAAACACGATATCGACAAGTCCGTG  
GGCTATTTCGACTCTTTGTTGGGAAGACATCAAACCTATTTACAACCTTCGACGATTTTACGAACTTCAACCAAGCGATATTCCTGAT  
GCCGACATCGAGCTACTCCTCGCTCGTATTCGTGATTTGCGGGAACCTCTATGGAAAAATCTCCAATGGAAAAGAAGCCAAGCGATTG  
ATTTTTATCGCCCCAATCCTTGAGACAGTCAGTCGTCTGCTCGGGGACTTCCGCATACTCGTCGAAGAAGACGTGGTTGAAAGGTAC  
GTGCTCCTGAAAGGTTCGATTCGAGTTCGTGCTCAAGCGTGGCACCAAGAGAATTTCAATTGTGCAAGCGAAAACGTGAAGATATGCTG  
CAGGGAGTGGTTTCAAGATGTGACGGGGCTGGAAGCGCTGGCTGATGTGCAAGATCTTACTGTGACGTATGGCATTGTGACGAATTTT  
CTCGAGTGAAGTCTTGATCAGTGGCGACGAGAAGGTCCGAGAGCATGAGACTGTTCTTTCTCAAGCGAATACCATACCGTCGTTTTG  
AAGGATTGAAAGAGATCGTCGGGAAGATTTA

>PhCRN07.3\_710 PLHAL7101755

CGGCGTGAGACCCCCTTTGCCACCAACTACACTACACCGTCACGTCTCAGACGATGGGCTGCGATCAATGCAATGATTCGCCAGAAG  
AATCAAGACGCGAACCAAGACGACGACTGAAGACGCCAAGAACACAAACAAGAAAGCGGAAAAAACACGATATCGACAAGTCCGTG  
GGCTATTTCGACTCTTTGTTGGGAAGACATCAAACCTATTTACAACCTTCGACGATTTTACGAACTTCAACCAAGCGATATTCCTGAT  
GCCGACATCGAGCTACTCCTCGCTCGTATTCGTGATTTGCGGGAACCTCTATGGAAAAATCTCCAATGGAAAAGAAGCCAAGCGATTG  
ATTTTTATCGCCCCAATCCTTGAGACAGTCAGTCGTCTGCTCGGGGACTTCCGCATACTCGTCGAAGAAGACGTGGTTGAAAGGTAC  
GTGCTCCTGAAAGGTTCGATTCGAGTTCGTGCTCAAGCGTGGCACCAAGAGAATTTCAATTGTGCAAGCGAAAACGTGAAGATATGCTG

CAGGGAGTGGTTCAGAATGTGACGGGGCTGGAAGCGCTGGCTGATGTGCAAGATCTTACTGTGACGTATGGCATTGTGACGAATTTT  
CTCGAGTGGAAAGTCTTGTATCAGTGGCGACGAGAAGGTCCGAGAGCATGAGACTGTTCTTTCTCAAGCGAATACCATACCGTCGTTTTG  
AAGGATTGAAAGAGATCGTCGGGAAGATTTA

>PhCRN07.3\_304 PLHAL3042873

CGGCGTGAGACCCCCTTTGCCACCAACTACACTACACCGTCACGTCTCAGACGATGGGGCTGCGATCAATGCAATGATTGCCAGAAG  
AATCAAGACGCGAACCAGAAGACGACGACTGAAGACGCCAAGAACACAAAACAAGAGCGGAAAAAACACGATATCGACAAGTCCGTG  
GGCTATTTCGACTCTTTGTTGGGAAGACATCAAACCTATTTACAACCTTCGACGATTCTTACGAACTTCAACCAAGCGATATTCCTGAT  
GCCGACATCGAGCTACTCCTCGCTCGTATTTCGTGATTTGCGGGAACTCTATGGAAAAATCTCCAATGGAAAAGAAGCCAAGCGATTG  
ATTTTTATCGCCCCAATCCTTGAGACAGTCAGTCGTCTGCTCGGGGACTTCCGCATACTCGTCGAAGAAGACGTGGTTGAAAGGTAC  
GTGCTCCTGAAAGGTTCGATTTCGAGTTCGTGCTCAAGCGTGGCACCAGAGAATTTCAATTGTGCAAGCGAAACGTGAAGATATGCTG  
CAGGGAGTGGTTTTCAGAATGTGACGGGGCTGGAAGCGCTGGCTGATGTGCAAGATCTTACTGTGACGTATGGCATTGTGACGAATTTT  
CTCGAGTGGAAAGTCTTGTATCAGTGGCGACGAGAAGGTCCGAGAGCATGAGACTGTTCTTTCTCAAGCGAATACCATACCGTCGTTTTG  
AAGGATTGAAAGAGATCGTCGGGAAGATTTA

>PhCRN07.3\_700 PLHAL7002819

CGGCGTGAGACCCCCTTTGCCACCAACTACACTACACCGTCACGTCTCAGACGATGGGGCTGCGATCAATGCAATGATTGCCAGAAG  
AATCAAGACGCGAACCAGAAGACGACGACTGAAGACGCCAAGAACACAAAACAAGAGCGGAAAAAACACGATATCGACAAGTCCGTG  
GGCTATTTCGACTCTTTGTTGGGAAGACATCAAACCTATTTACAACCTTCGACGATTCTTACGAACTTCAACCAAGCGATATTCCTGAT  
GCCGACATCGAGCTACTCCTCGCTCGTATTTCGTGATTTGCGGGAACTCTATGGAAAAATCTCCAATGGAAAAGAAGCCAAGCGATTG  
ATTTTTATCGCCCCAATCCTTGAGACAGTCAGTCGTCTGCTCGGGGACTTCCGCATACTCGTCGAAGAAGACGTGGTTGAAAGGTAC  
GTGCTCCTGAAAGGTTCGATTTCGAGTTCGTGCTCAAGCGTGGCACCAGAGAATTTCAATTGTGCAAGCGAAACGTGAAGATATGCTG  
CAGGGAGTGGTTTTCAGAATGTGACGGGGCTGGAAGCGCTGGCTGATGTGCAAGATCTTACTGTGACGTATGGCATTGTGACGAATTTT  
CTCGAGTGGAAAGTCTTGTATCAGTGGCGACGAGAAGGTCCGAGAGCATGAGACTGTTCTTTCTCAAGCGAATACCATACCGTCGTTTT  
GAAGGATTGAAAGATATCGTCGGGAAGATTTA

>PhCRN07.3\_730 PLHAL7302106

CGGCGTGAGACCCCCTTTGCCACCAACTACACTACACCGTCACGTCTCAGACGATGGGGCTGCGATCAATGCAATGATTGCCAGAAG  
AATCAAGACGCGAACCAGAAGACGACGACTGAAGACGCCAAGAACACAAAACAAGAGCGGAAAAAACACGATATCGACAAGTCCGTG  
GGCTATTTCGACTCTTTGTTGGGAAGACATCAAACCTATTTACAACCTTCGACGATTCTTACGAACTTCAACCAAGCGATATTCCTGAT  
GCCGACATCGAGCTACTCCTCGCTCGTATTTCGTGATTTGCGGGAACTCTATGGAAAAATCTCCAATGGAAAAGAAGCCAAGCGATTG  
ATTTTTATCGCCCCAATCCTTGAGACAGTCAGTCGTCTGCTCGGGGACTTCCGCATACTCGTCGAAGAAGACGTGGTTGAAAGGTAC  
GTGCTCCTGAAAGGTTCGATTTCGAGTTCGTGCTCAAGCGTGGCACCAGAGAATTTCAATTGTGCAAGCGAAACGTGAAGATATGCTG  
CAGGGAGTGGTTTTCAGAATGTGACGGGGCTGGAAGCGCTGGCTGATGTGCAAGATCTTACTGTGACGTATGGCATTGTGACGAATTTT  
CTCGAGTGGAAAGTCTTGTATCAGTGGCGACGAGAAGGTCCGAGAGCATGAGACTGTTCTTTCTCAAGCGAATACCATACCGTCGTTTT  
AAGGATTGAAAGAGATCGTCGGGAAGATTTA

>PhCRN10.1\_100 PLHAL100A10987

AGAGTAACGAGTGATCGATATTAGTAGAATTTTAAAACCTGTTTAACTAACAATTGCTATTTTGGCTATTTGACAATGCAACCTCTCGA  
TTATGAATGAGCAACGTCTTTTCGATATGATAGCGTTTCGGCCGCCAACCTCAAGGTAAATGAAACAGATTTGACCTCTCGGATCAG  
CGTCTCACGGTTAGTGGCAAGATGTCTAAAACCTATCATAACCAGCTCTAGTAAACCAGAAAATCTCGCTCCCTTGGAGCTCGTTCCAG  
AATATACTTGCTCGAGTAAAAATAGTGAAGCTAATCTGTGCGATCGTTGGTGTGGAAGGTAATGCGTTTCCCTGTGGACATTGATGCG  
GATCAGCTGGTGGGAGACCTCAAGAAGGCAAGAATGGCGAAAAAACCAAAGGGAATTGACGCAGACAAGTTGAAACTTTTTTTGGCC  
AAGACGGAGGGTGGCGCGTGGCTAGATGAGGCTGGCGTAGCTTTTGTGGCGCTTGTATGAACGTGGACTCCTGCAAGACTACATGAAG  
ATGAATCCCATGCTCTTTGGAGATAATTTTTAACTAGGTGAAGACCAAATTCACGTGCTGGTAGTGGTTCCGGTACGTGCAGTGGAG  
TATGGCACATGGATGCCGATTGACTTGTCTACCTTGGATCCTCAAGTTC AATTA AAAATGTGGAAGTCAGTTGTCAGAGTTTTTTTCA  
GAAGTTGAGTGTTCAGGAACAGCAGTGGTTGTGGATGAAACGTGACGCACCTGTATCTGCTGACGAACCTGTACATGTGGGTCGAC  
AAAACATTCACTGATCATCTGAGTGTGAATTCAGGAAAGAAGTCAATCGGTATCTGAGATGCCACCCCAAATGAAAACATGTTAT  
GGACGCTAATGCTGCAAGCAACCACGTCTTCACGGACGGCAGCGATGC

>PhCRN10.1\_334 PLHAL3341571

AGAGTAACGAGTGATCGATATTAGTAGAATTTTAAAACCTGTTTAACTAACAATTGCTATTTTGGCTATTTGACAATGCAACCTCTCGA  
TTATGAATGAGCAACGTCTTTTCGATATGATAGCGTTTCGGCCGCCAACCTCAAGGTAAATGAAACAGATTTGACCTCTCGGATCAG  
CGTCTCACGGTTAGTGGCAAGATGTCTAAAACCTATCATAACCAGCTCTAGTAAACCAGAAAATCTCGCTCCCTTGGAGCTCGTTCCAG  
AATATACTTGCTCGAGTAAAAATAGTGAAGCTAATCTGTGCGATCGTTGGTGTGGAAGGTAATGCGTTTCCCTGTGGACATTGATGCG  
GATCAGCTGGTGGGAGACCTCAAGAAGGCAAGAATGGCGAAAAAACCAAAGGGAATTGACGCAGACAAGTTGAAACTTTTTTTGGCC  
AAGACGGAGGGTGGCGCGTGGCTAGATGAGGCTGGCGTAGCTTTTGTGGCGCTTGTATGAACGTGGACTCCTGCAAGACTACATGAAG  
ATGAATCCCATGCTCTTTGGAGATAATTTTTAACTAGGTGAAGACCAAATTCACGTGCTGGTAGTGGTTCCGGTACGTGCAGTGGAG  
TATGGCACATGGATGCCGATTGACTTGTCTACCTTGGATCCTCAAGTTC AATTA AAAATGTGGAAGTCAGTTGTCAGAGTTTTTTTCA  
GAAGTTGAGTGTTCAGGAACAGCAGTGGTTGTGGATGAAACGTGACGCACCTGTATCTGCTGACGAACCTGTACATGTGGGTCGAC  
AAAACATTCACTGATCATCTGAGTGTGAATTCAGGAAAGAAGTCAATCGGTATCTGAGATGCCACCCCAAATGAAAACATGTTAT  
GGACGCTAATGCTGCAAGCAACCACGTCTTCACGGACGGCAGCGATGC

>PhCRN10.1\_703 PLHAL7030258

AGAGTAACGAGTGATCGATATTAGTAGAATTTTAAAACCTGTTTAACTAACAATTGCTATTTTGGCTATTTGACAATGCAACCTCTCGA  
TTATGAATGAGCAACGTCTTTTCGATATGATAGCGTTTCGGCCGCCAACCTCAAGGTAAATGAAACAGATTTGACCTCTCGGATCAG  
CGTCTCACGGTTAGTGGCAAGATGTCTAAAACCTATCATAACCAGCTCTAGTAAACCAGAAAATCTCGCTCCCTTGGAGCTCGTTCCAG  
AATATACTTGCTCGAGTAAAAATAGTGAAGCTAATCTGTGCGATCGTTGGTGTGGAAGGTAATGCGTTTCCCTGTGGACATTGATGCG  
GATCAGCTGGTGGGAGACCTCAAGAAGGCAAGAATGGCGAAAAAACCAAAGGGAATTGACGCAGACAAGTTGAAACTTTTTTTGGCC  
AAGACGGAGGGTGGCGCGTGGCTAGATGAGGCTGGCGTAGCTTTTGTGGCGCTTGTATGAACGTGGACTCCTGCAAGACTACATGAAG  
ATGAATCCCATGCTCTTTGGAGATAATTTTTAACTAGGTGAAGACCAAATTCACGTGCTGGTAGTGGTTCCGGTACGTGCAGTGGAG  
TATGGCACATGGATGCCGATTGACTTGTCTACCTTGGATCCTCAAGTTC AATTA AAAATGTGGAAGTCAGTTGTCAGAGTTTTTTTCA  
GAAGTTGAGTGTTCAGGAACAGCAGTGGTTGTGGATGAAACGTGACGCACCTGTATCTGCTGACGAACCTGTACATGTGGGTCGAC  
AAAACATTCACTGATCATCTGAGTGTGAATTCAGGAAAGAAGTCAATCGGTATCTGAGATGCCACCCCAAATGAAAACATGTTAT  
GGACGCTAATGCTGCAAGCAACCACGTCTTCACGGACGGCAGCGATGC

GAAGTTGAGTGTTTCAGGAACAGCAGTGGTTGTGGATGAAACGTCGACGCACTTGTATCTGCTGACGAACTTGTACATGTGGGTCGAC  
AAAACATTCACTGATCATCTGAGTGCTGAATTCAGGAAAGAAGTCAATCGGTATCTGAGATGCCACCCCCAAATGAAAACATGTTAT  
GGACGCTAATGCTGCAAAGCAACCACGTCTTCACGGACGGCAGCGATGC

>PhCRN10.1\_710 PLHAL7100233

AGAGTAACGAGTGATCGATATTAGTAGAATTTTAAAACCTGTTTAACTAACAATTGCTATTTTGCTATTTGACAATGCAACCTCTCGA  
TTATGAATGAGCAACGTCTTTTCGATATGATAGCGTTTCGGCCGCCAACCTCAAGGTAAATGAAACAGATTTGACCTCTCGGATCAG  
CGTCTCACGGTTAGTGGAAGATGTCTAAAACCTATCATAACCAGCTCTAGTAAACCAGAAAATCTCGCTCCCTTGGAGCTCGTTCCAG  
AATATACTTGCTCGAGTAAAAATAGTGAAGCTAATCTGTGCGATCGTTGGTGTGGAAGGTAATGCGTTTCCCTGTGGACATTGATGCG  
GATCAGCTGGTGGGAGACCTCAAGAAGGCAAGAATGGCGAAAAAACCAAAGGGAATTGACGCAGACAAGTTGAAACTTTTTTTGGCC  
AAGACGGAGGGTGGCGCGTGGCTAGATGAGGCTGGCGTAGCTTTTGTGGCGCTTGTATGAACGTGGACTCCTGCAAGACTACATGAAG  
ATGAATCCCATGCTCTTTGGAGATAATTTTAACTAGGTGAAGACCAAATTCACGTGCTGGTAGTGGTTCCGGTACGTGCAGTGGAG  
TATGGCACATGGATGCCGATTGACTTGTCTACCTTGGATCCTCAAGTTC AATTA AAAATGTGGAAGTCAGTTGTCAGAGTTTTTTTCA  
GAAGTTGAGTGTTTCAGGAACAGCAGTGGTTGTGGATGAAACGTCGACGCACTTGTATCTGCTGACGAACTTGTACATGTGGGTCGAC  
AAAACATTCACTGATCATCTGAGTGCTGAATTCAGGAAAGAAGTCAATCGGTATCTGAGATGCCACCCCCAAATGAAAACATGTTAT  
GGACGCTAATGCTGCAAAGCAACCACGTCTTCACGGACGGCAGCGATGC

>PhCRN10.1\_304 PLHAL3041208

AGAGTAACGAGTGATCGATATTAGTAGAATTTTAAAACCTGTTTAACTAACAATTGCTATTTTGCTATTTGACAATGCAACCTCTCGA  
TTATGAATGAGCAACGTCTTTTCGATATGATAGCGTTTCGGCCGCCAACCTCAAGGTAAATGAAACAGATTTGACCTCTCGGATCAG  
CGTCTCACGGTTAGTGGAAGATGTCTAAAACCTATCATAACCAGCTCTAGTAAACCAGAAAATCTCGCTCCCTTGGAGCTCGTTCCAG  
AATATACTTGCTCGAGTAAAAATAGTGAAGCTAATCTGTGCGATCGTTGGTGTGGAAGGTAATGCGTTTCCCTGTGGACATTGATGCG  
GATCAGCTGGTGGGAGACCTCAAGAAGGCAAGAATGGCGAAAAAACCAAAGGGAATTGACGCAGACAAGTTGAAACTTTTTTTGGCC  
AAGACGGAGGGTGGCGCGTGGCTAGATGAGGCTGGCGTAGCTTTTGTGGCGCTTGTATGAACGTGGACTCCTGCAAGACTACATGAAG  
ATGAATCCCATGCTCTTTGGAGATAATTTTAACTAGGTGAAGACCAAATTCACGTGCTGGTAGTGGTTCCGGTACGTGCAGTGGAG  
TATGGCACATGGATGCCGATTGACTTGTCTACCTTGGATCCTCAAGTTC AATTA AAAATGTGGAAGTCAGTTGTCAGAGTTTTTTTCA  
GAAGTTGAGTGTTTCAGGAACAGCAGTGGTTGTGGATGAAACGTCGACGCACTTGTATCTGCTGACGAACTTGTACATGTGGGTCGAC  
AAAACATTCACTGATCATCTGAGTGCTGAATTCAGGAAAGAAGTCAATCGGTATCTGAGATGCCACCCCCAAATGAAAACATGTTAT  
GGACGCTAATGCTGCAAAGCAACCACGTCTTCACGGACGGCAGCGATGC

>PhCRN10.1\_700 PLHAL7003067

AGAGTAACGAGTGATCGATATTAGTAGAATTTTAAAACCTGTTTAACTAACAATTGCTATTTTGCTATTTGACAATGCAACCTCTCGA  
TTATGAATGAGCAACGTCTTTTCGATATGATAGCGTTTCGGCCGCCAACCTCAAGGTAAATGAAACAGATTTGACCTCTCGGATCAG  
CGTCTCACGGTTAGTGGAAGATGTCTAAAACCTATCATAACCAGCTCTAGTAAACCAGAAAATCTCGCTCCCTTGGAGCTCGTTCCAG  
AATATACTTGCTCGAGTAAAAATAGTGAAGCTAATCTGTGCGATCGTTGGTGTGGAAGGTAATGCGTTTCCCTGTGGACATTGATGCG  
GATCAGCTGGTGGGAGACCTCAAGAAGGCAAGAATGGCGAAAAAACCAAAGGGAATTGACGCAGACAAGTTGAAACTTTTTTTGGCC  
AAGACGGAGGGTGGCGCGTGGCTAGATGAGGCTGGCGTAGCTTTTGTGGCGCTTGTATGAACGTGGACTCCTGCAAGACTACATGAAG  
ATGAATCCCATGCTCTTTGGAGATAATTTTAACTAGGTGAAGACCAAATTCACGTGCTGGTAGTGGTTCCGGTACGTGCAGTGGAG  
TATGGCACATGGATGCCGATTGACTTGTCTACCTTGGATCCTCAAGTTC AATTA AAAATGTGGAAGTCAGTTGTCAGAGTTTTTTTCA  
GAAGTTGAGTGTTTCAGGAACAGCAGTGGTTGTGGATGAAACGTCGACGCACTTGTATCTGCTGACGAACTTGTACATGTGGGTCGAC  
AAAACATTCACTGATCATCTGAGTGCTGAATTCAGGAAAGAAGTCAATCGGTATCTGAGATGCCACCCCCAAATGAAAACATGTTAT  
GGACGCTAATGCTGCAAAGCAACCACGTCTTCACGGACGGCAGCGATGC

>PhCRN10.1\_730 PLHAL7300176

AGAGTAACGAGTGATCGATATTAGTAGAATTTTAAAACCTGTTTAACTAACAATTGCTATTTTGCTATTTGACAATGCAACCTCTCGA  
TTATGAATGAGCAACGTCTTTTCGATATGATAGCGTTTCGGCCGCCAACCTCAAGGTAAATGAAACAGATTTGACCTCTCGGATCAG  
CGTCTCACGGTTAGTGGAAGATGTCTAAAACCTATCATAACCAGCTCTAGTAAACCAGAAAATCTCGCTCCCTTGGAGCTCGTTCCAG  
AATATACTTGCTCGAGTAAAAATAGTGAAGCTAATCTGTGCGATCGTTGGTGTGGAAGGTAATGCGTTTCCCTGTGGACATTGATGCG  
GATCAGCTGGTGGGAGACCTCAAGAAGGCAAGAATGGCGAAAAAACCAAAGGGAATTGACGCAGACAAGTTGAAACTTTTTTTGGCC  
AAGACGGAGGGTGGCGCGTGGCTAGATGAGGCTGGCGTAGCTTTTGTGGCGCTTGTATGAACGTGGACTCCTGCAAGACTACATGAAG  
ATGAATCCCATGCTCTTTGGAGATAATTTTAACTAGGTGAAGACCAAATTCACGTGCTGGTAGTGGTTCCGGTACGTGCAGTGGAG  
TATGGCACATGGATGCCGATTGACTTGTCTACCTTGGATCCTCAAGTTC AATTA AAAATGTGGAAGTCAGTTGTCAGAGTTTTTTTCA  
GAAGTTGAGTGTTTCAGGAACAGCAGTGGTTGTGGATGAAACGTCGACGCACTTGTATCTGCTGACGAACTTGTACATGTGGGTCGAC  
AAAACATTCACTGATCATCTGAGTGCTGAATTCAGGAAAGAAGTCAATCGGTATCTGAGATGCCACCCCCAAATGAAAACATGTTAT  
GGACGCTAATGCTGCAAAGCAACCACGTCTTCACGGACGGCAGCGATGC

>PhCRN10.2\_100 PLHAL100A13001

AATTTTAAAATTTGTTTATCTAAAACCTTGCTATTTTGCTATTTGACGATGCAACCTCTCGATTATGAATGAGCAACGTCGTTTCGATA  
TGATAGCGTTTCGGCCGCCAACCTCAAGGTAAATGAAACAGATTTGACCTCTCGGATCAGCGTCTTATGGTTAGTTGCAAAAATCTAT  
GTCTAAAACCATCATGTCCGCTCTAGTACACCAGGAATTCCTTCCCTTGTAGCTCATTCAGAAATATACCTGCTCGAGTAAAAAT  
GGTGAAGCTAATCTGTGCGATCGTTGGTGTGGCAGGTAATGCGTTTCCCTGTGGACATCGACGCGGGTCAGTTGGTGGGAGACCTCAA  
GAAGGCAATAATGGCGAAAAAACGAGGGAATCGACGCAGACAAGTCGAAACTTTTTTTGGCCAAGACGGAGGGTGGCGCGTGGCTA  
GATGAGGCTGGCGTAG

>PhCRN10.2\_334 PLHAL3343415

AATTTTAAAATTTGTTTATCTAAAACCTTGCTATTTTGCTATTTGACGATGCAACCTCTCGATTATGAATGAGCAACGTCGTTTCGATA  
TGATAGCGTTTCGGCCGCCAACCTCAAGGTAAATGAAACAGATTTGACCTCTCGGATCAGCGTCTTATGGTTAGTTGCAAAAATCTAT  
GTCTAAAACCATCATGTCCGCTCTAGTACACCAGGAATTCCTTCCCTTGTAGCTCATTCAGAAATATACCTGCTCGAGTAAAAAT  
GGTGAAGCTAATCTGTGCGATCGTTGGTGTGGCAGGTAATGCGTTTCCCTGTAGCTCATTCAGAAATATACCTGCTCGAGTAAAAAT  
GGTGAAGCTAATCTGTGCGATCGTTGGTGTGGCAGGTAATGCGTTTCCCTGTGGACATCGACGCGGGTCAGTTGGTGGGAGACCTCAA  
GAAGGCAATAATGGCGAAAAAACGAGGGAATCGACGCAGACAAGTCGAAACTTTTTTTGGCCAAGACGGAGGGTGGCGCGTGGCTA  
GATGAGGCTGGCGTAG

>PhCRN10.2\_703 PLHAL7032298

AATTTTAAAATTGTTTATCTAAAACCTTGCTATTTTGCTATTTGACGATGCAACCTCTCGATTATGAATGAGCAACGTCGTTTCGATA  
TGATAGCGTTTCGGCCGCCAACTTCAAGGTAAATTGAACAGATTTGACCTCTCGGATCAGCGTCTTATGGTTAGTTGCAAAATCTAT  
GTCTAAAACCATCATGTCCGCTCTAGTACACCAGGAATTCTCCTTCCCTTGTAGCTCATTCCAGAAATATACCTGCTCGAGTAAAAAT  
GGTGAAGCTAATCTGTGCGATCGTTGGTGTGGCAGGTAATGCGTTTCCCTGTGGACATCGACGCGGGTCAGTTGGTGGGAGACCTCAA  
GAAGGCAATAATGGCGAAAAAACGAGGGAATCGACGCAGACAAGTCGAAACTTTTTTTGGCCAAGACGGAGGGTGGCGCGTGGCTA  
GATGAGGCTGGCGTAG

>PhCRN10.2\_710 PLHAL7102079

AATTTTAAAATTGTTTATCTAAAACCTTGCTATTTTGCTATTTGACGATGCAACCTCTCGATTATGAATGAGCAACGTCGTTTCGATA  
TGATAGCGTTTCGGCCGCCAACTTCAAGGTAAATTGAACAGATTTGACCTCTCGGATCAGCGTCTTATGGTTAGTTGCAAAATCTAT  
GTCTAAAACCATCATGTCCGCTCTAGTACACCAGGAATTCTCCTTCCCTTGTAGCTCATTCCAGAAATATACCTGCTCGAGTAAAAAT  
GGTGAAGCTAATCTGTGCGATCGTTGGTGTGGCAGGTAATGCGTTTCCCTGTGGACATCGACGCGGGTCAGTTGGTGGGAGACCTCAA  
GAAGGCAATAATGGCGAAAAAACGAGGGAATCGACGCAGACAAGTCGAAACTTTTTTTGGCCAAGACGGAGGGTGGCGCGTGGCTA  
GATGAGGCTGGCGTAG

>PhCRN10.2\_304 PLHAL3042989

AATTTTAAAATTGTTTATCTAAAACCTTGCTATTTTGCTATTTGACGATGCAACCTCTCGATTATGAATGAGCAACGTCGTTTCGATA  
TGATAGCGTTTCGGCCGCCAACTTCAAGGTAAATTGAACAGATTTGACCTCTCGGATCAGCGTCTTATGGTTAGTTGCAAAATCTAT  
GTCTAAAACCATCATGTCCGCTCTAGTACACCAGGAATTCTCCTTCCCTTGTAGCTCATTCCAGAAATATACCTGCTCGAGTAAAAAT  
GGTGAAGCTAATCTGTGCGATCGTTGGTGTGGCAGGTAATGCGTTTCCCTGTGGACATCGACGCGGGTCAGTTGGTGGGAGACCTCAA  
GAAGGCAATAATGGCGAAAAAACGAGGGAATCGACGCAGACAAGTCGAAACTTTTTTTGGCCAAGACGGAGGGTGGCGCGTGGCTA  
GATGAGGCTGGCGTAG

>PhCRN10.2\_700 PLHAL7004054

AATTTTAAAATTGTTTATCTAAAACCTTGCTATTTTGCTATTTGACGATGCAACCTCTCGATTATGAATGAGCAACGTCGTTTCGATA  
TGATAGCGTTTCGGCCGCCAACTTCAAGGTAAATTGAACAGATTTGACCTCTCGGATCAGCGTCTTATGGTTAGTTGCAAAATCTAT  
GTCTAAAACCATCATGTCCGCTCTAGTACACCAGGAATTCTCCTTCCCTTGTAGCTCATTCCAGAAATATACCTGCTCGAGTAAAAAT  
GGTGAAGCTAATCTGTGCGATCGTTGGTGTGGCAGGTAATGCGTTTCCCTGTGGACATCGACGCGGGTCAGTTGGTGGGAGACCTCAA  
GAAGGCAATAATGGCGAAAAAGAACGAGGGGATCGACGCAGACAAGTCGAAACTTTTTTTGGCCAAGACGGAGGGTGGCGCGTGGCTA  
GATGAGGCTGGCGTAG

>PhCRN10.2\_730 PLHAL7303337

AATTTTAAAATTGTTTATCTAAAACCTTGCTATTTTGCTATTTGACGATGCAACCTCTCGATTATGAATGAGCAACGTCGTTTCGATA  
TGATAGCGTTTCGGCCGCCAACTTCAAGGTAAATTGAACAGATTTGACCTCTCGGATCAGCGTCTTATGGTTAGTTGCAAAATCTAT  
GTCTAAAACCATCATGTCCGCTCTAGTACACCAGGAATTCTCCTTCCCTTGTAGCTCATTCCAGAAATATACCTGCTCGAGTAAAAAT  
GGTGAAGCTAATCTGTGCGATCGTTGGTGTGGCAGGTAATGCGTTTCCCTGTGGACATCGACGCGGGTCAGTTGGTGGGAGACCTCAA  
GAAGGCAATAATGGCGAAAAAACGAGGGAATCGACGCAGACAAGTCGAAACTTTTTTTGGCCAAGACGGAGGGTGGCGCGTGGCTA  
GATGAGGCTGGCGTAG

>PhCRN12\_100 PLHAL100A10499\_RC

GAACAGATTTGACCTCTCGGATCAGCGTCTTATGGTTCAGTTGCAAAAACTATGTCCAAAA  
CCATATGTCCGCTCTAGTACACCAGGAATTCTCCTTCCCTTGTAGCTCATTCCAGAAATAT  
ACTTGCTCGAGTAAAAAATGGTGAAGCTAATCTATGCGATCGTTGGTGGGAGACCTCAAGAAGGCAATAATGG  
CGAAAAGAACGAGGGGATCGACGCAGACAAGTCGAAACTTTTTTTGGCCAAGACGGAGGG  
TGGCGCGTGGCTAGATGAGGCTGGCGTAGCTTTTGTGGCGCTCGATGAACCGTGGACTCC  
TGCAAGACTACGTACAGATGAAATCCACACTGTGGATCAAGAATCCCATTTTCTTTGGAG  
ATGATT

>PhCRN12\_334 PLHAL3340491\_RC

GAACAGATTTGACCTCTCGGATCAGCGTCTTATGGTTCAGTTGCAAAAACTATGTCCAAAA  
CCATATGTCCGCTCTAGTACACCAGGAATTCTCCTTCCCTTGTAGCTCATTCCAGAAATAT  
ACTTGCTCGAGTAAAAAATGGTGAAGCTAATCTATGCGATCGTTGGTGGGAGACCTCAAGAAGGCAATAATGG  
CGAAAAGAACGAGGGGATCGACGCAGACAAGTCGAAACTTTTTTTGGCCAAGACGGAGGG  
TGGCGCGTGGCTAGATGAGGCTGGCGTAGCTTTTGTGGCGCTCGATGAACCGTGGACTCC  
TGCAAGACTACGTACAGATGAAATCCACACTGTGGATCAAGAATCCCATTTTCTTTGGAG  
ATGATT

>PhCRN12\_703 PLHAL7030571\_RC

GAACAGATTTGACCTCTCGGATCAGCGTCTTATGGTTCAGTTGCAAAAACTATGTCCAAAA  
CCATATGTCCGCTCTAGTACACCAGGAATTCTCCTTCCCTTGTAACTCATTCCAGAAATAT  
ACTTGCTCGAGTAAAAAATGGCGAAGCTAATCTATGCGATCGTTGGTGGGAGACCTCAAGAAGGCAATAATGG  
CGAAAAGAACGAGGGGATCGACGCAGACAAGTCGAAACTTTTTTTGGCCAAGACGGAGGG  
TGGCGCGTGGCTAGATGAGGCTGGCGTAGCTTTTGTGGCGCTCGATGAACCGTGGACTCC  
TGCAAGACTACGTACAGATGAAATCCACACTGTGGATCAAGAATCCCATTTTCTTTGGAG  
ATGATT

>PhCRN12\_710 PLHAL7100194\_RC

GAACAGATTTGACCTCTCGGATCAGCGTCTTATGGTTCAGTTGCAAAAACTATGTCCAAAA  
CCATATGTCCGCTCTAGTACACCAGGAATTCTCCTTCCCTTGTAGCTCATTCCAGAAATAT  
ACTTGCTCGAGTAAAAAATGGTGAAGCTAATCTATGCGATCGTTGGTGGGAGACCTCAAGAAGGCAATAATGG  
CGTTCCCTGTGGACATCGACGCGGGTCAGTTGGTGGGAGACCTCAAGAAGGCAATAATGG

CGAAAAGAACGAGGGGATCGACGCAGACAAGTCGAAACTTTTTTTGGCCAAGACGGAGGG  
TGGCGCGTGGCTAGATGAGGCTGGCGTAGCTTTTGTGGCGCTCGATGAACCGTGGACTCC  
TGCAAGACTACGTACAGATGAAATCCACACTGTGGATCAAGAATCCCATTTTCTTTGGAG  
ATGATT

>PhCRN12\_304 PLHAL3040530\_RC

GAACAGATTTGACCTCTCGGATCAGCGTCTTATGGTCAGTTGCAAAAACTATGTCCAAAA  
CCATATGTCCGCTCTAGTACACCAGGAATTCTCCTTCCCTTGTAGCTCATTCAGAAATAT  
ACTTGCTCGAGTAAAAAATGGTGAAGCTAATCTATGCGATCGTTGGTTCGGCAAGTAATG  
CGTTCCTGTGGACATCGACGCGGGTCAGTTGGTGGGAGACCTCAAGAAGGCAATAATGG  
CGAAAAGAACGAGGGGATCGACGCAGACAAGTCGAAACTTTTTTTGGCCAAGACGGAGGG  
TGGCGCGTGGCTAGATGAGGCTGGCGTAGCTTTTGTGGCGCTCGATGAACCGTGGACTCC  
TGCAAGACTACGTACAGATGAAATCCACACTGTGGATCAAGAATCCCATTTTCTTTGGAG  
ATGATT

>PhCRN12\_700 PLHAL7000693\_RC

GAACAGATTTGACCTCTCGGATCAGCGTCTTATGGTCAGTTGCAAAAACTATGTCCAAAA  
CCATATGTCCGCTCTAGTACACCAGGAATTCTCCTTCCCTTGTAACTCATTCAGAAATAT  
ACTTGCTCGAGTAAAAAATGGCGAAGCTAATCTATGCGATCGTTGGTTCGGCAAGTAATG  
CGTTCCTGTGGACATCGACGCGGGTCAGTTGGTGGGAGACCTCAAGAAGGCAATAATGG  
CGAAAAGAACGAGGGGATCGACGCAGACAAGTCGAAACTTTTTTTGGCCAAGACGGAGGG  
TGGCGCGTGGCTAGATGAGGCTGGCGTAGCTTTTGTGGCGCTCGATGAACCGTGGACTCC  
TGCAAGACTACGTACAGATGAAATCCACACTGTGGATCAAGAATCCCATTTTCTTTGGAG  
ATGATT

>PhCRN12\_730 PLHAL7300137\_RC

GAACAGATTTGACCTCTCGGATCAGCGTCTTATGGTCAGTTGCAAAAACTATGTCCAAAA  
CCATATGTCCGCTCTAGTACACCAGGAATTCTCCTTCCCTTGTAACTCATTCAGAAATAT  
ACTTGCTCGAGTAAAAAATGGCGAAGCTAATCTATGCGATCGTTGGTTCGGCAAGTAATG  
CGTTCCTGTGGACATCGACGCGGGTCAGTTGGTGGGAGACCTCAAGAAGGCAATAATGG  
CGAAAAGAACGAGGGGATCGACGCAGACAAGTCGAAACTTTTTTTGGCCAAGACGGAGGG  
TGGCGCGTGGCTAGATGAGGCTGGCGTAGCTTTTGTGGCGCTCGATGAACCGTGGACTCC  
TGCAAGACTACGTACAGATGAAATCCACACTGTGGATCAAGAATCCCATTTTCTTTGGAG  
ATGATT

>PhCRN17.1\_100 PLHAL100A11882

TTCCTAGCCAAGACAGAGGGCGGCGCTTGGTTGTCAAGCCAATCAGACGACGTGAAGAAGCTCAAGAAGGGCGAGAAGACAGCTCTC  
ATCGAATCGCTAATAAAGGAGGATCAACAGCTACAGGCGGAGGACCCGCTGGAATACGTGCTGAGAGAAAACAGTATGGTCACCCCA  
CAGTTAACACAGATTCACGTGCTGGTGTGGTTTCTGGACAACGCTATCCCTAGGTGCCGCCGCTCTTCGTGAACCCCATCCCGTC  
CGCAAGAAAAGGTGGAAAGAAGTGAACGAAGTACTTGATCGGAACAAAAGGTGAAGGTCAACTCTGCTGGTGAGTCCCTCCACAGGG  
TACTCATAACGTGTCGTTCCCGGATGTCGACAAAATAATGAGGACGCGTCGCTACGAGCAGCCATCGAAAGTCGTCGAAAATGACAAA  
CTTGACATGCTCTATGCGTATCTCCTGCTCCTACCTAAAGCATTTCGGAGACATCGTGACGGGAAAAGAATCGAAAAAACTTCACCTC  
ATCGTCCCAATACTTGCTGCGTTTGTGGGCATTTTGTGAGGAAAGTCCGGATTCTCGCCGAAAAGACAGTTACCGGGAAACGAGTA  
CATGGAGACGGGTCTTTTGAATTTGTGATTGAACGTGGCAGTAAACGTGTGTGCATCGTGAGGCGGAAACGAGATGATTTTCAGCAG  
GGCCTCGCGCAGGCTTACGTAGGGTGCAGGACTCGCAGATGTCGAAGGATTGACGAAGCTATACAGCATCGTCACAAATTACAAG  
GAATGGTACTTCTCCAGAAGTCTGGATGACAGAATCGAGCGATTTGATGTCACGATGGATATCGTGAACGACATTCCTACGCGAGAA  
TCGGTGAAGATGATTGCAGAGAAGATCTACTCCATGCTGTGATGATGATGAGCCAGCCGTGGCTCCAACGAGGCTATCCTATGA  
CGTTGGGTCCGATAGTCAAGTCACTCTGCGCTCCCTTTTAAAGGATCGTTTGTGATGCGTACGCTTAACTCAGTATGCTGGAGCCAG  
GAAGCAGCAACAAGATGCGAAGGTGGCAGGGTACTATTATTAAGAGATCAGAAAAAGATAACCACAATCTAGTATTA

>PhCRN17.1\_334 PLHAL3342065

TTCCTAGCCAAGACAGAGGGCGGCGCTTGGTTGTCAAGCCAATCAGACGACGTGAAGAAGCTCAAGAAGGGCGAGAAGACAGCTCTC  
ATCGAATCGCTAATAAAGGAGGATCAACAGCTACAGGCGGAGGACCCGCTGGAATACGTGCTGAGAGAAAACAGTATGGTCACCCCA  
CAGTTAACACAGATTCACGTGCTGGTGTGGTTTCTGGACAACGCTATCCCTAGGTGCCGCCGCTCTTCGTGAACCCCATCCCGTC  
CGCAAGAAAAGGTGGAAAGAAGTGAACGAAGTACTTGATCGGAACAAAAGGTGAAGGTCAACTCTGCTGGTGAGTCCCTCCACAGGG  
TACTCATAACGTGTCGTTCCCGGATGTCGACAAAATAATGAGGACGCGTCGCTACGAGCAGCCATCGAAAGTCGTCGAAAATGACAAA  
CTTGACATGCTCTATGCGTATCTCCTGCTCCTACCTAAAGCATTTCGGAGACATCGTGACGGGAAAAGAATCGAAAAAACTTCACCTC  
ATCGTCCCAATACTTGCTGCGTTTGTGGGCATTTTGTGAGGAAAGTCCGGATTCTCGCCGAAAAGACAGTTACCGGGAAACGAGTA  
CATGGAGACGGGTCTTTTGAATTTGTGATTGAACGTGGCAGTAAACGTGTGTGCATCGTGACGCGGAAACGAGATGATTTTCAGCAG  
GGCCTCGCGCAGGCTTACGTAGGGTGCAGGACTCGCAGATGTCGAAGGATTGACGAAGCTATACAGCATCGTCACAAATTACAAG  
GAATGGTACTTCTCCAGAAGTCTGGATGACAGAATCGAGCGATTTGATGTCACGATGGATATCGTGAACGACATTCCTACGCGAGAA  
TCGGTGAAGATGATTGCAGAGAAGATCTACTCCATGCTGTGATGATGATGAGCCAGCCGTGGCTCCAACGAGGCTATCCTATGA  
CGTTGGGTCCGCATAGTCAAGTCACTCTGCGCTCCCTTTTAAAGGATCGTTTGTGATGCGTACGCTTAACTCAGTATGCTGGAGCCAG  
GAAGCAGCAACAAGATGCGAAGGTGGCAGGGTACTATTATTAAGAGATCAGAAAAAGATAACCACAATCTAGTATTA

>PhCRN17.1\_703 PLHAL7031836\_A

TTCCTAGCCAAGACAGAGGGCGGCGCTTGGTTGTCAAGCCAATCAGACGACGTGAAGAAGCTCAAGAAGGGCGAGAAGACAGCTCTC  
ATCGAATCGCTAATAAAGGAGGATCAACAGCTACAGGCGGAGGACCCGCTGGAATACGTGCTGAGAGAAAACAGTATGGTCACCCCA  
CAGTTAACACAGATTCACGTGCTGGTGTGGTTTCTGGACAACGCTATCCCTAGGTGCCGCCGCTCTTCGTGAACCCCATCCCGTC  
CGCAAGAAAAGGTGGAAAGAAGTGAACGAAGTACTTGATCGGAACAAAAGGTGAAGGTCAACTCTGCTGGTGAGTCCCTCCACAGGG  
TACTCATAACGTGTCGTTCCCGGATGTCGACAAAATAATGAGGACGCGTCGCTACGAGCAGCCATCGAAAGTCGTCGAAAATGACAAA  
CTTGACATGCTCTATGCGTATCTCCTGCTCCTACCTAAAGCATTTCGGAGACATCGTGACGGGAAAAGAATCGAAAAAACTTCACCTC

ATCGTCCCAATACTTGCCTGCGTTTGTGGGCATTTTGTGATGGAGAAGTCCGGATTCTCGCCGAAAAGACAGTTACCGGGAAACGAGTA  
CATGGAGACGGGTCTTTTGAATTTGTGATTGA  
>PhCRN17.1\_703 PLHAL7031836\_B  
GTGATTGAACGTGGCAGTAAACATTTGTGCATCTGGCAGGCGAAACGAGATGATTTTCAGCAGGGCCTCGCGCAGGCTTACGTAGGG  
TGCGAAGTACTCGCAGATGTGCGAAGGATTGACGAAGCTATACAGCATCGTGCACAAATTACAAGGAATGGTACTTCTCCAGAAGTCTG  
GATGACAGAATCGAGCGATTTGATGTACAGATGGATATCGTGAACGACATTCCTACGCGAGAAATCGGTGAAGATGATTGCAGAGAAG  
ATCTACTCCATGCTGTGATGATGATGAGCCAGCCGTGGCCTCCAACGAGGCTATCCTATGACGTTGGGTTCGGCATAGTCAAGTCA  
TCTCTGCGCTCCCTTTTTAAGGATCGTTTGTGATGCGTACGCTTAACTCAGTATGCTGGAGCCAGGAAGCAGCAACAAGATGCGAAGGT  
GGCAGGGTACTATTATTAAGAGATCAGAAAAAGATAACCACAATCTAGTATTA  
>PhCRN17.1\_710 PLHAL7101563  
TTCCTAGCCAAGACAGAGGGCGGCGCTTGGTTGTCAAGCCAATCAGACGACGTGAAGAAGCTCAAGAAGGGCGAGAAGACAGCTCTC  
ATCGAATCGCTAATAAAGGAGGATCAACAGCTACAGGCGGAGGACCCGCTGGAATACGTGCTGAGAGAAAACAGTATGGTCACCCCA  
CAGTTAACACAGATTCACGTGCTGGTGTGTTTCTGGACAACGCTATCCCTAGGTGCCGCGCTCTTCGTGAACCCCATCCCGTC  
CGCAAGAAAAGGTGGAAAAGAACTGAACGAAGTACTTGTATCGGAACAAAAGGTGCGAAGGTCAACTCTGCTGGTGTAGTCTCCACAGGG  
TACTCATACTGCTGCTTTCGCGGATGTGACAAAATAATGAGGACGCGTTCGCTACGAGCAGCCATCGAAAGTCTGCGAAAATGACAAA  
CTTGACATGCTCTATGCGTATCTCCTGCTCCTACCTAAAGCATTCGGAGACATCGTGCAGGGGAAAAGAATCGAAAAAACTTCACTTC  
ATCGTCCCAATACTTGCCTGCGTTTGTGGGCATTTTGTGATGGAGAAGTCCGGATTCTCGCCGAAAAGACAGTTACCGGGAAACGAGTA  
CATGGAGACGGGTCTTTTGAATTTGTGATTGAACGTGGCAGTAAACGTGTGTGCATCGTGGAGGCGAAACGAGATGATTTTTCAGCAG  
GGCCTCGCGCAGGCTTACGTAGGGTGCGAAGTACTCGCAGATGTGCGAAGGATTGACGAAGCTATACAGCATCGTCACAAATTTACAAG  
GAATGGTACTTCTCCAGAAGTCTGGATGACAGAATCGAGCGATTTGATGTACAGATGGATATCGTGAACGACATTCCTACGCGAGAA  
TCGGTGAAGATGATTGCAGAGAAGATCTACTCCATGCTGTGATGATGATGAGCCAGCCGTGGCCTCCAACGAGGCTATCCTATGA  
CGTTGGGTTCGGCATAGTCAAGTCATCTCTGCGCTCCCTTTTTAAGGATCGTTTGTGATGCGTACGCTTAACTCAGTATGCTGGAGCCAG  
GAAGCAGCAACAAGATGCGAAGGTGGCAGGGTACTATTATTAAGAGATCAGAAAAAGATAACCACAATCTAGTATTA  
>PhCRN17.1\_304 PLHAL3041959  
TTCCTAGCCAAGACAGAGGGCGGCGCTTGGTTGTCAAGCCAATCAGACGACGTGAAGAAGCTCAAGAAGGGCGAGAAGACAGCTCTC  
ATCGAATCGCTAATAAAGGAGGATCAACAGCTACAGGCGGAGGACCCGCTGGAATACGTGCTGAGAGAAAACAGTATGGTCACCCCA  
CAGTTAACACAGATTCACGTGCTGGTGTGTTTCTGGACAACGCTATCCCTAGGTGCCGCGCTCTTCGTGAACCCCATCCCGTC  
CGCAAGAAAAGGTGGAAAAGAACTGAACGAAGTACTTGTATCGGAACAAAAGGTGCGAAGGTCAACTCTGCTGGTGTAGTCTCCACAGGG  
TACTCATACTGCTGCTTTCGCGGATGTGACAAAATAATGAGGACGCGTTCGCTACGAGCAGCCATCGAAAGTCTGCTGAGTCTCCACAGGG  
CTTGACATGCTCTATGCGTATCTCCTGCTCCTACCTAAAGCATTCGGAGACATCGTGCAGGGGAAAAGAATCGAAAAAACTTCACTTC  
ATCGTCCCAATACTTGCCTGCGTTTGTGGGCATTTTGTGATGGAGAAGTCCGGATTCTCGCCGAAAAGACAGTTACCGGGAAACGAGTA  
CATGGAGACGGGTCTTTTGAATTTGTGATTGAACGTGGCAGTAAACGTGTGTGCATCGTGGAGGCGAAACGAGATGATTTTTCAGCAG  
GGCCTCGCGCAGGCTTACGTAGGGTGCGAAGTACTCGCAGATGTGCGAAGGATTGACGAAGCTATACAGCATCGTCACAAATTTACAAG  
GAATGGTACTTCTCCAGAAGTCTGGATGACAGAATCGAGCGATTTGATGTACAGATGGATATCGTGAACGACATTCCTACGCGAGAA  
TCGGTGAAGATGATTGCAGAGAAGATCTACTCCATGCTGTGATGATGATGAGCCAGCCGTGGCCTCCAACGAGGCTATCCTATGA  
CGTTGGGTTCGGCATAGTCAAGTCATCTCTGCGCTCCCTTTTTAAGGATCGTTTGTGATGCGTACGCTTAACTCAGTATGCTGGAGCCAG  
GAAGCAGCAACAAGATGCGAAGGTGGCAGGGTACTATTATTAAGAGATCAGAAAAAGATAACCACAATCTAGTATTA  
>PhCRN17.1\_700a PLHAL7002998  
GGTGAAGATGATTGCAGAGAAGATCTACTCCATGCTGTGATGATGATGAGCCAGCCGTGGCCTCCAACGAGGCTATCCTATGACG  
TTGGGTTCGGCATAGTCAAGTCATCTCTGCGCTCCCTTTTTAAGGATCGTTTGTGATGCGTACGCTTAACTCAGTATGCTGGAGCCAGGA  
AGCAGCAACAAGATGCGAAGGTGGCAGGGTACTATTATTAAGAGATCAGAAAAAGATAACCACAATCTAGTATTA  
>PhCRN17.1\_700b PLHAL7003118  
TTCCTAGCCAAGACAGAGGGCGGCGCTTGGTTGTCAAGCCAATCAGACGACGTGAAGAAGCTCAAGAAGGGCGAGAAGACAGCTCTC  
ATCGAATCGCTAATAAAGGAGGATCAACAGCTACAGGCGGAGGACCCGCTGGAATACGTGCTGAGAGAAAACAGTATGGTCACCCCA  
CAGTTAACACAGATTCACGTGCTGGTGTGTTTCTGGACAACGCTATCCCTAGGTGCCGCGCTCTTCGTGAACCCCATCCCGTC  
CGCAAGAAAAGGTGGAAAAGAACTGAACGAAGTACTTGTATCGGAACAAAAGGTGCGAAGGTCAACTCTGCTGGTGTAGTCTCCACAGGG  
TACTCATACTGCTGCTTTCGCGGATGTGACAAAATAATGAGGACGCGTTCGCTACGAGCAGCCATCGAAAGTCTGCTGAGTCTCCACAGGG  
CTTGACATGCTCTATGCGTATCTCCTGCTCCTACCTAAAGCATTCGGAGACATCGTGCAGGGGAAAAGAATCGAAAAAACTTCACTTC  
ATCGTCCCAATACTTGCCTGCGTTTGTGGGCATTTTGTGATGGAGAAGTCCGGATTCTCGCCGAAAAGACAGTTACCGGGAAACGAGTA  
CATGGAGACGGGTCTTTTGAATTTGTGATTGAACGTGGCAGTAAACGTGTGTGCATCGTGGAGGCGAAACGAGATGATTTTTCAGCAG  
GGCCTCGCGCAGGCTTACGTAGGGTGCGAAGTACTCGCAGATGTGCGAAGGATTGACGAAGCTATACAGCATCGTCACAAATTTACAAG  
GAATGGTACTTCTCCAGAAGTCTGGATGACAGAATCGAGCGATTTGATGTACAGATGGATATCGTGAACGACATTCCTACGCGAGAA  
TCGGTGAAGATGATTGCAGAGAAGATCTACTCC  
>PhCRN17.1\_730 PLHAL7301897  
TTCCTAGCCAAGACAGAGGGCGGCGCTTGGTTGTCAAGCCAATCAGACGACGTGAAGAAGCTCAAGAAGGGCGAGAAGACAGCTCTC  
ATCGAATCGCTAATAAAGGAGGATCAACAGCTACAGGCGGAGGACCCGCTGGAATACGTGCTGAGAGAAAACAGTATGGTCACCCCA  
CAGTTAACACAGATTCACGTGCTGGTGTGTTTCTGGACAACGCTATCCCTAGGTGCCGCGCTCTTCGTGAACCCCATCCCGTC  
CGCAAGAAAAGGTGGAAAAGAACTGAACGAAGTACTTGTATCGGAACAAAAGGTGCGAAGGTCAACTCTGCTGGTGTAGTCTCCACAGGG  
TACTCATACTGCTGCTTTCACCGATGTGACAAAATAATGAGGACGCGTTCGCTACGAGCAGCCATCGAAAGTCTGCGAAAATGACAAA  
CTTGACATGCTCTATGCGTATCTCCTGCTCCTACCTAAAGCATTCGGAGACATCGTGCAGGGGAAAAGAATCGAAAAAACTTCACTTC  
ATCGTCCCAATACTTGCCTGCGTTTGTGGGCATTTTGTGATGGAGAAGTCCGGATTCTCGCCGAAAAGACAGTTACCGGGAAACGAGTA  
CATGGAGACGGGTCTTTTGAATTTGTGATTGAACGTGGCAGTAAACGTGTGTGCATCGTGGAGGCGAAACGAGATGATTTTTCAGCAG  
GGCCTCGCGCAGGCTTACGTAGGGTGCGAAGTACTCGCAGATGTGCGAAGGATTGACGAAGCTATACAGCATCGTCACAAATTTACAAG  
GAATGGTACTTCTCCAGAAGTCTGGATGACAGAATCGAGCGATTTGATGTACAGATGGATATCGTGAACGACATTCCTACGCGAGAA  
TCGGTGAAGATGATTGCAGAGAAGATCTACTCCATGCTGTGATGATGATGAGCCAGCCGTGGCCTCCAACGAGGCTATCCTATGA  
CGTTGGGTTCGGCATAGTCAAGTCATCTCTGCGCTCCCTTTTTAAGGATCGTTTGTGATGCGTACGCTTAACTCAGTATGCTGGAGCCAG  
GAAGCAGCAACAAGATGCGAAGGTGGCAGGGTACTATTATTAAGAGATCAGAAAAAGATAACCACAATCTAGTATTA



>PhCRN17.2\_100 PLHAL100A10115

TTGCGTCACACCACCATGTTTCGATTAAGTACGCTGAAATCCTCCCTCTCACCTTCCACATTCCAGAATGTACCGGCTCGAGTAAAT  
ATCGTGAAGCTTGTTTGTGCGATCGTTGGTCCGACAGGAAACGCGTTTCTGTGGATATCGATGCGGATCAGCCGGTAGGAGACCTC  
AAGAAGATAATCAAGGCGGACAGTCCAGACAGAATCAAGTGCAGCAGCTATGTTGGAGCTTTTCTTAGCCAAGACAGAGGGCGGC  
GCTTGGTTATCAAGCCAATCAGATGACGTAAGAAGCTTAAGAAGGGCGAGAAGACAGCTCTCATCAAATCGCTAATAAAGGAGGAT  
CAACAGCTACAGGCGGAGGTCCCGCTGGAATACGTGCTAAGAGAAAAACAATATGGCCACCCACAGCTGAGACAGATTACGTTCTG  
GTGGTGGTTCC

>PhCRN17.2\_334 PLHAL3341375

TTGCGTCACACCACCATGTTTCGATTAAGTACGCTGAAATCCTCCCTCTCACCTTCCACATTCCAGAATGTACCGGCTCGAGTAAAT  
ATCGTGAAGCTTGTTTGTGCGATCGTTGGTCCGACAGGAAACGCGTTTCTGTGGATATCGATGCGGATCAGCCGGTAGGAGACCTC  
AAGAAGATAATCAAGGCGGACAGTCCAGACAGAATCAAGTGCAGCAGCTATGTTGGAGCTTTTCTTAGCCAAGACAGAGGGCGGC  
GCTTGGTTATCAAGCCAATCAGATGACG

>PhCRN17.2\_703 PLHAL7030124

TTGCGTCACACCACCATGTTTCGATTAAGTACGCTGAAATCCTCCCTCTCACCTTCCACATTCCAGAATGTACCGGCTCGAGTAAAT  
ATCGTGAAGCTTGTTTGTGCGATCGTTGGTCCGACAGGAAACGCGTTTCTGTGGATATCGATGCGGATCAGCCGGTAGGAGACCTC  
AAGAAGATAATCAAGGCGGACAGTCCAGACAGAATCAAGTGCAGCAGCTATGTTGGAGCTTTTCTTAGCCAAGACAGAGGGCGGC  
GCTTGGTTATCAAGCCAATCAGATGACGTAAGAAGCTCAAGAAGGGCGAGAAGACAGCTCTCATCAAATCGCTAATAAAGGAGGAT  
CAACAGCTACAGGCGGAGGACCCGCTGGAATACGTGCTGAGAGAAAAACAATATGGCCACCCACAGCTGAGACAGATTACGTTCTG  
GTGGTGGTTCC

>PhCRN17.2\_710 PLHAL7100116

TTGCGTCACACCACCATGTTTCGATTAAGTACGCTGAAATCCTCCCTCTCACCTTCCACATTCCAGAATGTACCGGCTCGAGTAAAT  
ATCGTGAAGCTTGTTTGTGCGATCGTTGGTCCGACAGGAAACGCGTTTCTGTGGATATCGATGCGGATCAGCCGGTAGGAGACCTC  
AAGAAGATAATCAAGGCGGACAGTCCAGACAGAATCAAGTGCAGCAGCTATGTTGGAGCTTTTCTTAGCCAAGACAGAGGGCGGC  
GCTTGGTTATCAAGCCAATCAGATGACGTAAGAAGCTCAAGAAGGGCGAGAAGACAGCTCTCATCAAATCGCTAATAAAGGAGGAT  
CAACAGCTACAGGCGGAGGACCCGCTGGAATACGTGCTGAGAGAAAAACAATATGGCCACCCACAGCTGAGACAGATTACGTTCTG  
GTGGTGGTTCC

>PhCRN17.2\_304 PLHAL3040745

TTGCGTCACACCACCATGTTTCGATTAAGTACGCTGAAATCCTCCCTCTCACCTTCCACATTCCAGAATGTACCGGCTCGAGTAAAT  
ATCGTGAAGCTTGTTTGTGCGATCGTTGGTCCGACAGGAAACGCGTTTCTGTGGATATCGATGCGGATCAGCCGGTAGGAGACCTC  
AAGAAGATAATCAAGGCGGACAGTCCAGACAGAATCAAGTGCAGCAGCTATGTTGGAGCTTTTCTTAGCCAAGACAGAGGGCGGC  
GCTTGGTTATCAAGCCAATCAGATGACGTGAA

>PhCRN17.2\_700 PLHAL7001006

TTGCGTCACACCACCATGTTTCGATTAAGTACGCTGAAATCCTCCCTCTCACCTTCCACATTCCAGAATGTACCGGCTCGAGTAAAT  
ATCGTGAAGCTTGTTGAAGTTATTTGTGCGATCGTTGGTCCGACAGGAAACGCGTTTCTGTGGATATCGATGCGGATCAGCCGGTA  
GGAGACCTCAAGAAGATAATCAAGGCGGACAGTCCAGACAGAATCAAGTGCAGCAGCTATGTTGGAGCTTTTCTTAGCCAAGACA  
GAGGGCGGCGCTTGGTTATCAAGCCAATCAGATGACGTAAGAAGCTCAAGAAGGGCGAGAAGACAGCTCTCATCAAATCGCTAATA  
AAGGAGGATCAACAGCTACAGGC

>PhCRN17.2\_730 PLHAL7300117

TTGCGTCACACCACCATGTTTCGATTAAGTACGCTGAAATCCTCCCTCTCACCTTCCACATTCCAGAATGTACCGGCTCGAGTAAAT  
ATCGTGAAGCTTGTTTGTGCGATCGTTGGTCCGACAGGAAACGCGTTTCTGTGGATATCGATGCGGATCAGCCGGTAGGAGACCTC  
AAGAAGATAATCAAGGCGGACAGTCCAGACAGAATCAAGTGCAGCAGCTATGTTGGAGCTTTTCTTAGCCAAGACAGAGGGCGGC  
GCTTGGTTATCAAGCCAATCAGATGACGTAAGAAGCTCAAGAAGGGCGAGAAGACAGCTCTCATCAAATCGCTAATAAAGGAGGAT  
CAACAGCTACAGGC

>PhCRN17.3\_100 PLHAL100A13544

GAACAACAGCTACAGGCGGAGGACCCGCTGGAATACGTGCTGAGAGAAAAAGTATGGCCACCCACAGTCGAGACAGATTACGTT  
CTGGTGGTGGTTCTGGACAAAAGCCTATCACTAGGTGCCGCCGCTCTTCGTGAACCCCATCCCGTCCGCAAGAAAAGGTGGGAAGAA  
CTGAACAAAGTACTTGATCGGAACAAAAGGTGCAAGGTCAACTCTGCTGGTGAGTCTCCACAGGGTACTCATACTGTCGTTCCACC  
GATGTCGACAAAATAATGAAGGCGCGTACGAGCAGCCATCGAAAAGTTCGTGCAAAAATGACAAAATTGACGTGCTCCATGCGTAT  
CTGCTACTCCTGACCAAAGCTTTTCGGAGAAAATCGTGACGGAAAAAGAGCGAAAAAGACTTCACTTCATCGTCCCAATACTTGCCTGC  
GTTTGTGGGCTTTTTGATGGAGAAGTCCGGATTCTCGCTGAAGAGACAGTTACCGGAAAACGAGTACATGGAGACGGGTCTTTTGAA  
TTTGTGATTGAACGTGGCAGTAAACGTGTGTGCATCGTGGAGGCGAAAACGAGATGATTTTCAGCAGGGCCTCGCGAGGCTTACGTA  
GGGTGCGAAGTACTCGCAGATGTGCAAGGATTGACGAAGCTATACAGCATCGTCACAAATTTCAAGGAATGGTACTTCTCCAGAAGT  
CTGGATGACAGAATCGAGCGATTTGATGCAACGATTAATATCGTGAACGACATTCCTACGCGAGAATCGGTGAAGATGATTGCAGAG  
AAGATCTACTCCATGCTGTGAGATGATGATGAGCCAGCCGTTGCTCCAACGAGGCTATCCAATGACGTTGGGTGGCATTGTCAAG  
TCATCTCTGCGCTCCCTTTTTGAAGGATCGTTTGTGATGCGTACGCTTAGATCAGTATGCTAGAGCTAGGAAGCAGCAACAA

>PhCRN17.3\_334 PLHAL3343622

GAACAACAGCTACAGGCGGAGGACCCGCTGGAATACGTGCTGAGAGAAAAAGTATGGCCACCCACAGTCGAGACAGATTACGTT  
CTGGTGGTGGTTCTGGACAAAAGCCTATCACTAGGTGCCGCCGCTCTTCGTGAACCCCATCCCGTCCGCAAGAAAAGGTGGGAAGAA  
CTGAACAAAGTACTTGATCGGAACAAAAGGTGCAAGGTCAACTCTGCTGGTGAGTCTCCACAGGGTACTCATACTGTCGTTCCACC  
GATGTCGACAAAATAATGAAGGCGCGTACGAGCAGCCATCGAAAAGTTCGTGCAAAAATGACAAAATTGACGTGCTCCATGCGTAT  
CTGCTACTCCTGACCAAAGCTTTTCGGAGAAAATCGTGACGGAAAAAGAGCGAAAAAGACTTCACTTCATCGTCCCAATACTTGCCTGC  
GTTTGTGGGCTTTTTGATGGAGAAGTCCGGATTCTCGCTGAAGAGACAGTTACCGGAAAACGAGTACATGGAGACGGGTCTTTTGAA  
TTTGTGATTGAACGTGGCAGTAAACGTGTGTGCATCGTGGAGGCGAAAACGAGATGATTTTCAGCAGGGCCTCGCGAGGCTTACGTA  
GGGTGCGAAGTACTCGCAGATGTGCAAGGATTGACGAAGCTATACAGCATCGTCACAAATTTCAAGGAATGGTACTTCTCCAGAAGT  
CTGGATGACAGAATCGAGCGATTTGATGCAACGATTAATATCGTGAACGACATTCCTACGCGAGAATCGGTGAAGATGATTGCAGAG

AAGATCTACTCCATGCTGTCAGATGATGATGAGCCAGCCGTTGGTCTCCAACGAGGCTATCCAATGACGTTGGGTCCGGCATTGTCAAG  
TCATCTCTGCGCTCCCTTTTGAAGGATCGTTTGTATGCGTACGCTTAGATCAGTATGCTAGAGCTAGGAAGCAGCAACAA  
>PhCRN17.3\_703 PLHAL7032950  
GAACAACAGCTACAGGCGGAGGACCCGCTGGAATACGTGCTGAGAGAAAAAGTATGGCCACCCACAGTCGAGACAGATTACCGTT  
CTGGTGGTGGTTCTTGACAAAAGCCTATCACTAGGTGCCGCCGCTCTTCGTGAACCCCATCCCGTCCGCAAGAAAAGGTGGGAAGAA  
CTGAACAAAGTACTTGGATCGGAACAAAAGGTGCAAGGTCAACTCTGCTGGTGAGTCTCCACAGGGTACTCATACTGTCGTTCCACC  
GATGTGCGACAAAATAATGAAGGCGCGTACGAGCAGCCATCGAAAAGTTCGTGCAAAAATGACAACTTGACGTGCTCCATGCGTAT  
CTGCTACTCCTGACCAAAGCTTTTCGGAGAAAATCGTGACGGGAAAAAGAGCGAAAAGACTTCACTTCATCGTCCCAATACTTGCCTGC  
GTTTGTGGGCTTTTTGATGGAGAAGTCCGGATTCTCGCTGAAGAGACAGTTACCGGGAAACGAGTACATGGAGACGGGTCTTTTGAA  
TTTTGTGATTGAACGTGGCAGTAAACGTGTGTGCATCGTGGAGGCGAAAACGAGATGATTTTTCAGCAGGGCCTCGCGCAGGCTTACGTA  
GGGTGCGAAGTACTCGCAGATGTGCAAGGATTGACGAAGCTATACAGCATCGTCACAAATTTCAAGGAATGGTACTTCTCCAGAAGT  
CTGGATGACAGAATCGAGCGATTTGATGCAACGATTAATATCGTGAACGACATTCCTACGCGAGAATCGGTGAAGATGATTGCAGAG  
AAGATCTACTCCATGCTGTCAGATGATGATGAGCCAGCCGTTGGTCTCCAACGAGGCTATCCAATGACGTTGGGTCCGGCATTGTCAAG  
TCATCTCTGCGCTCCCTTTTGAAGGATCGTTTGTATGCGTACGCTTAGATCAGTATGCTAGAGCTAGGAAGCAGCAACAA  
>PhCRN17.3\_710 PLHAL7103059  
GAACAACAGCTACAGGCGGAGGACCCGCTGGAATACGTGCTGAGAGAAAAAGTATGGCCACCCACAGTCGAGACAGATTACCGTT  
CTGGTGGTGGTTCTTGACAAAAGCCTATCACTAGGTGCCGCCGCTCTTCGTGAACCCCATCCCGTCCGCAAGAAAAGGTGGGAAGAA  
CTGAACAAAGTACTTGGATCGGAACAAAAGGTGCAAGGTCAACTCTGCTGGTGAGTCTCCACAGGGTACTCATACTGTCGTTCCACC  
GATGTGCGACAAAATAATGAAGGCGCGTACGAGCAGCCATCGAAAAGTTCGTGCAAAAATGACAACTTGACGTGCTCCATGCGTAT  
CTGCTACTCCTGACCAAAGCTTTTCGGAGAAAATCGTGACGGGAAAAAGAGCGAAAAGACTTCACTTCATCGTCCCAATACTTGCCTGC  
GTTTGTGGGCTTTTTGATGGAGAAGTCCGGATTCTCGCTGAAGAGACAGTTACCGGGAAACGAGTACATGGAGACGGGTCTTTTGAA  
TTTTGTGATTGAACGTGGCAGTAAACGTGTGTGCATCGTGGAGGCGAAAACGAGATGATTTTTCAGCAGGGCCTCGCGCAGGCTTACGTA  
GGGTGCGAAGTACTCGCAGATGTGCAAGGATTGACGAAGCTATACAGCATCGTCACAAATTTCAAGGAATGGTACTTCTCCAGAAGT  
CTGGATGACAGAATCGAGCGATTTGATGCAACGATTAATATCGTGAACGACATTCCTACGCGAGAATCGGTGAAGATGATTGCAGAG  
AAGATCTACTCCATGCTGTCAGATGATGATGAGCCAGCCGTTGGTCTCCAACGAGGCTATCCAATGACGTTGGGTCCGGCATTGTCAAG  
TCATCTCTGCGCTCCCTTTTGAAGGATCGTTTGTATGCGTACGCTTAGATCAGTATGCTAGAGCTAGGAAGCAGCAACAA  
>PhCRN17.3\_304 PLHAL3043498  
GAACAACAGCTACAGGCGGAGGACCCGCTGGAATACGTGCTGAGAGAAAAAGTATGGCCACCCACAGTCGAGACAGATTACCGTT  
CTGGTGGTGGTTCTTGACAAAAGCCTATCACTAGGTGCCGCCGCTCTTCGTGAACCCCATCCCGTCCGCAAGAAAAGGTGGGAAGAA  
CTGAACAAAGTACTTGGATCGGAACAAAAGGTGCAAGGTCAACTCTGCTGGTGAGTCTCCACAGGGTACTCATACTGTCGTTCCACC  
GATGTGCGACAAAATAATGAAGGCGCGTACGAGCAGCCATCGAAAAGTTCGTGCAAAAATGACAACTTGACGTGCTCCATGCGTAT  
CTGCTACTCCTGACCAAAGCTTTTCGGAGAAAATCGTGACGGGAAAAAGAGCGAAAAGACTTCACTTCATCGTCCCAATACTTGCCTGC  
GTTTGTGGGCTTTTTGATGGAGAAGTCCGGATTCTCGCTGAAGAGACAGTTACCGGGAAACGAGTACATGGAGACGGGTCTTTTGAA  
TTTTGTGATTGAACGTGGCAGTAAACGTGTGTGCATCGTGGAGGCGAAAACGAGATGATTTTTCAGCAGGGCCTCGCGCAGGCTTACGTA  
GGGTGCGAAGTACTCGCAGATGTGCAAGGATTGACGAAGCTATACAGCATCGTCACAAATTTCAAGGAATGGTACTTCTCCAGAAGT  
CTGGATGACAAAATCGAGCGATTTGATGCAACGATTAATATCGTGAACGACATTCCTACGCGAGAATCGGTGAAGATGATTGCAGAG  
AAGATCTACTCCATGCTGTCAGATGATGATGAGCCAGCCGTTGGTCTCCAACGAGGCTATCCAATGACGTTGGGTCCGGCATTGTCAAG  
TCATCTCTGCGCTCCCTTTTGAAGGATCGTTTGTATGCGTACGCTTAGATCAGTATGCTAGAGCTAGGAAGCAGCAACAA  
>PhCRN17.3\_700 PLHAL7002833  
GAACAACAGCTACAGGCGGAGGACCCGCTGGAATACGTGCTGAGAGAAAAAGTATGGCCACCCACAGTCGAGACAGATTACCGTT  
CTGGTGGTGGTTCTTGACAAAAGCCTATCACTAGGTGCCGCCGCTCTTCGTGAACCCCATCCCGTCCGCAAGAAAAGGTGGGAAGAA  
CTGAACAAAGTACTTGGATCGGAACAAAAGGTGCAAGGTCAACTCTGCTGGTGAGTCTCCACAGGGTACTCATACTGTCGTTCCACC  
GATGTGCGACAAAATAATGAAGGCGCGTACGAGCAGCCATCGAAAAGTTCGTGCAAAAATGACAACTTGACGTGCTCCATGCGTAT  
CTGCTACTCCTGACCAAAGCTTTTCGGAGAAAATCGTGACGGGAAAAAGAGCGAAAAGACTTCACTTCATCGTCCCAATACTTGCCTGC  
GTTTGTGGGCTTTTTGATGGAGAAGTCCGGATTCTCGCTGAAGAGACAGTTACCGGGAAACGAGTACATGGAGACGGGTCTTTTGAA  
TTTTGTGATTGAACGTGGCAGTAAACGTGTGTGCATCGTGGAGGCGAAAACGAGATGATTTTTCAGCAGGGCCTCGCGCAGGCTTACGTA  
GGGTGCGAAGTACTCGCAGATGTGCAAGGATTGACGAAGCTATACAGCATCGTCACAAATTTCAAGGAATGGTACTTCTCCAGAAGT  
CTGGATGACAGAATCGAGCGATTTGATGCAACGATTAATATCGTGAACGACATTCCTACGCGAGAATCGGTGAAGATGATTGCAGAG  
AAGATCTACTCCATGCTGTCAGATGATGATGAGCCAGCCGTTGGTCTCCAACGAGGCTATCCAATGACGTTGGGTCCGGCATTGTCAAG  
TCATCTCTGCGCTCCCTTTTGAAGGATCGTTTGTATGCGTACGCTTAGATCAGTATGCTAGAGCTAGGAAGCAGCAACAA  
>PhCRN17.3\_730 PLHAL7303581  
GAACAACAGCTACAGGCGGAGGACCCGCTGGAATACGTGCTGAGAGAAAAAGTATGGCCACCCACAGTCGAGACAGATTACCGTT  
CTGGTGGTGGTTCTTGACAAAAGCCTATCACTAGGTGCCGCCGCTCTTCGTGAACCCCATCCCGTCCGCAAGAAAAGGTGGGAAGAA  
CTGAACAAAGTACTTGGATCGGAACAAAAGGTGCAAGGTCAACTCTGCTGGTGAGTCTCCACAGGGTACTCATACTGTCGTTCCACC  
GATGTGCGACAAAATAATGAAGGCGCGTACGAGCAGCCATCGAAAAGTTCGTGCAAAAATGACAACTTGACGTGCTCCATGCGTAT  
CTGCTACTCCTGACCAAAGCTTTTCGGAGAAAATCGTGACGGGAAAAAGAGCGAAAAGACTTCACTTCATCGTCCCAATACTTGCCTGC  
GTTTGTGGGCTTTTTGATGGAGAAGTCCGGATTCTCGCTGAAGAGACAGTTACCGGGAAACGAGTACATGGAGACGGGTCTTTTGAA  
TTTTGTGATTGAACGTGGCAGTAAACGTGTGTGCATCGTGGAGGCGAAAACGAGATGATTTTTCAGCAGGGCCTCGCGCAGGCTTACGTA  
GGGTGCGAAGTACTCGCAGATGTGCAAGGATTGACGAAGCTATACAGCATCGTCACAAATTTCAAGGAATGGTACTTCTCCAGAAGT  
CTGGATGACAGAATCGAGCGATTTGATGCAACGATTAATATCGTGAACGACATTCCTACGCGAGAATCGGTGAAGATGATTGCAGAG  
AAGATCTACTCCATGCTGTCAGATGATGATGAGCCAGCCGTTGGTCTCCAACGAGGCTATCCAATGACGTTGGGTCCGGCATTGTCAAG  
TCATCTCTGCGCTCCCTTTTGAAGGATCGTTTGTATGCGTACGCTTAGATCAGTATGCTAGAGCTAGGAAGCAGCAACAA  
>PhCRN17.4\_100 PLHAL100A10522  
GGTTTAGAAATTTGCGTTACACCACCATGTTTCGCTTAAGTACGCTGAAACTCTTCCCTCACCTTCCACATTCCAAATCTACCGGCTC  
GTGTAAGATGGTGAAGCTTATTTGTGCGATCGTTGGTCCGGCAGGAAACGCGTTTCTGTGGACATCGATGCGGATCAGCTGGTGG  
GAGACCTCAAGGACGCGATTAGGGCGAAGAATCCAGACACGATCAAGTGCAGGCGAGTAAGTTGGAGCTTCTTCCGCCATAACAG  
ATGGCGGCGCTTGGTTATCAAGCCAATCAGATGACGTGAAGAAGCTTAAGAAGGGCGAGAAGACAGCTCTCATCAAATTTGCTAATAA  
AGGAGGATCAACAGTACAGGCGGAGGACCCCTTTGGAATACGTGCTGAGAGAAAAACAATATGGCCACCCACAGTCGAGACAGATTAC  
ACGTTCTGGTGGTGGTTCC  
>PhCRN17.4\_334 PLHAL3341699

GGTTTAGAAATTGCGTTACACCACCATGTTTCGCTTAAGTACGCCTGAAACTCTTCCTCACCTTCCACATTCCAAAATCTACCGGCTC  
GTGTAAAGATGGTGAAGCTTATTTGTGCGATCGTTGGTCCGGCAGGAAACCGCTTTCCTGTGGACATCGATGCGGATCAGCTGGTGG  
GAGACCTCAAGGACGCGATTAGGGCGAAGAATCCAGACACGATCAAGTGCAGGAGCAGTAAGTTGGAGCTCTTCCTGGCCATAACAG  
ATGGCGGCGCTTGGTTATCAAGCCAATCAGATGACGTGAAGAAGCTTAAGAAGGGCGAGAAGACAGCTCTCATCAAATTGCTAATAA  
AGGAGGATCAACAGCTACAGGCGGAGGACCCCTTTGGAATACGTGCTGAGAGAAAACAATATGGCCACCCACAGTCGAGACAGATTC  
ACGTTCTGGTGGTGGTTCC

>PhCRN17.4\_703 PLHAL7031340

GGTTTAGAAATTGCGTTACACCACCATGTTTCGCTTAAGTACGCCTGAAACTCTTCCTCACCTTCCACATTCCAAAATCTACCGGCTC  
GTGTAAAGATGGTGAAGCTTATTTGTGCGATCGTTGGTCCGGCAGGAAACCGCTTTCCTGTGGACATCGATGCGGATCAGCTGGTGG  
GAGACCTCAAGGACGCGATTAGGGCGAAGAATCCAGACACGATCAAGTGCAGGAGCAGTAAGTTGGAGCTCTTCCTGGCCATGACAG  
ATGGCGGCGCTTGGTTATCAAGCCAATCAGATGACGTGAAGAAGCTTAAGAAGGGCGAGAAGACAGCTCTCATCAAATTGCTAATAA  
AGGAGGATCAACAGCTACAGGCGGAGGACCCCTTTGGAATACGTGCTGAGAGAAAACAATATGGCCACCCACAGTCGAGACAGATTC  
ACGTTCTGGTGGTGGTTCC

>PhCRN17.4\_710 PLHAL7100553

GGTTTAGAAATTGCGTTACACCACCATGTTTCGCTTAAGTACGCCTGAAACTCTTCCTCACCTTCCACATTCCAAAATCTACCGGCTC  
GTGTAAAGATGGTGAAGCTTATTTGTGCGATCGTTGGTCCGGCAGGAAACCGCTTTCCTGTGGACATCGATGCGGATCAGCTGGTGG  
GAGACCTCAAGGACGCGATTAGGGCGAAGAATCCAGACACGATCAAGTGCAGGAGCAGTAAGTTGGAGCTCTTCCTGGCCATGACAG  
ATGGCGGCGCTTGGTTATCAAGCCAATCAGATGACGTGAAGAAGCTTAAGAAGGGCGAGAAGACAGCTCTCATCAAATTGCTAATAA  
AGGAGGATCAACAGCTACAGGCGGAGGACCCCTTTGGAATACGTGCTGAGAGAAAACAATATGGCCACCCACAGTCGAGACAGATTC  
ACGTTCTGGTGGTGGTTCC

>PhCRN17.4\_304 PLHAL3040986

GGTTTAGAAATTGCGTTACACCACCATGTTTCGCTTAAGTACGCCTGAAACTCTTCCTCACCTTCCACATTCCAAAATCTACCGGCTC  
GTGTAAAGATGGTGAAGCTTATTTGTGCGATCGTTGGTCCGGCAGGAAACCGCTTTCCTGTGGACATCGATGCGGATCAGCTGGTGG  
GAGACCTCAAGGACGCGATTAGGGCGAAGAATCCAGACACGATCAAGTGCAGGAGCAGTAAGTTGGAGCTCTTCCTGGCCATAACAG  
ATGGCGGCGCTTGGTTATCAAGCCAATCAGATGACGTGAAGAAGCTTAAGAAGGGCGAGAAGACAGCTCTCATCAAATTGCTAATAA  
AGGAGGATCAACAGCTACAGGCGGAGGACCCCTTTGGAATACGTGCTGAGAGAAAACAATATGGCCACCCACAGTCGAGACAGATTC  
ACGTTCTGGTGGTGGTTCC

>PhCRN17.4\_700 PLHAL7002876

GGTTTAGAAATTGCGTTACACCACCATGTTTCGCTTAAGTACGCCTGAAACTCTTCCTCACCTTCCACATTCCAAAATCTACCGGCTC  
GTGTAAAGATGGTGAAGCTTATTTGTGCGATCGTTGGTCCGGCAGGAAACCGCTTTCCTGTGGACATCGATGCGGATCAGCTGGTGG  
GAGACCTCAAGGACGCGATTAGGGCGAAGAATCCAGACACGATCAAGTGCAGGAGCAGTAAGTTGGAGCTCTTCCTGGCCATGACAG  
ATGGCGGCGCTTGGTTATCAAGCCAATCAGATGACGTGAAGAAGCTTAAGAAGGGCGAGAAGACAGCTCTCATCAAATTGCTAATAA  
AGGAGGATCAACAGCTACAGGCGGAGGACCCCTTTGGAATACGTGCTGAGAGAAAACAATATGGCCACCCACAGTCGAGACAGATTC  
ACGTTCTGGTGGTGGTTCC

>PhCRN17.4\_730 PLHAL7301376

GGTTTAGAAATTGCGTTACACCACCATGTTTCGCTTAAGTACGCCTGAAACTCTTCCTCACCTTCCACATTCCAAAATCTACCGGCTC  
GTGTAAAGATGGTGAAGCTTATTTGTGCGATCGTTGGTCCGGCAGGAAACCGCTTTCCTGTGGACATCGATGCGGATCAGCTGGTGG  
GAGACCTCAAGGACGCGATTAGGGCGAAGAATCCAGACACGATCAAGTGCAGGAGCAGTAAGTTGGAGCTCTTCCTGGCCATGACAG  
ATGGCGGCGCTTGGTTATCAAGCCAATCAGATGACGTGAAGAAGCTTAAGAAGGGCGAGAAGACAGCTCTCATCAAATTGCTAATAA  
AGGAGGATCAACAGCTACAGGCGGAGGACCCCTTTGGAATACGTGCTGAGAGAAAACAATATGGCCACCCACAGTCGAGACAGATTC  
ACGTTCTGGTGGTGGTTCC

>PhCRN18\_100 PLHAL100A12060

ATTCCAGAATCAACCAGCTCGAGTAATGATGGTAAATCTGTTGTGTGCGATTGTTGGTGCAGGCAAGTTATGCGTTTGGAGTGAACAT  
TGACGATACTGCGTCAGTATCGGCTTTGAAGAAGGCAGTAAAAGCGGAGAATCCAGACACGATCAAGTGCAGGAGCAGTAAGTTGGA  
GCTTTTTTCTAGCCAAGACAGAGGGCGGCGCTGGTTGGATTCTACCACCGACGATGTGAAGAAGCTGAAGAAGGGCGAAAAGACTGC  
TTTGATCGAAGCTCTGACACATGAAGACAATGAACCTTGATGGCACATTTGGCCTCGAAGACTATCTCGTGGGTATGCCAGAGCCGAA  
AACCAGGCAAATCCACGTACTGGTGGTGAATCCGGCTGGTAATTCGCTGACATTGGTGTAACTCCTTCCAGATTGCTGAAATATAA  
GCGTACGTATTCTCGACCCAAGCTGTTTGAATATGTTGTTGCTAAAAGGTTTTGTGCAGAGCAGGATACAGACGCTGGATCGTACGTG  
CGCAATTCATCTCAATTCTTATATCGATTATCGCTACCATCATTGATGTGTGCATACGGGCAGAAATCCAACCGACGAAAAAGGATGTC  
TAGCAGCTGATGTTCCGCATTTCTGTGTTACTTGGCTGGTGTTCCTCTGGCGTAATAGCTGTCCAAATATTTTTGAACTTTGCA  
AAATTAAGCTTGACGGTAAAATCAATGACGCTAGCGACCAGACACTTATCAAGCCATTTAAGAAATGACCGACCTGACTTTTTGTTG  
CTGAAGCGCAGCACATTGCAGCTGTCTGTTTCTGAAGATCAGCGATAACCTCAACAACCTTATAGGGCACAAAGAGAAACAGAGGA  
AGAGAAATTAGGTAAATTAATGAAAGAATTGTGGCTTTAA

>PhCRN18\_334 PLHAL3342172

ATTCCAGAATCAACCAGCTCGAGTAATGATGGTAAATCTGTTGTGTGCGATTGTTGGTGCAGGCAAGTTATGCGTTTGGAGTGAACAT  
TGACGATACTGCGTCAGTATCGGCTTTGAAGAAGGCAGTAAAAGCGGAGAATCCAGACACGATCAAGTGCAGGAGCAGTAAGTTGGA  
GCTTTTTTCTAGCCAAGACAGAGGGCGGCGCTGGTTGGATTCTACCACCGACGATGTGAAGAAGCTGAAGAAGGGCGAAAAGACTGC  
TTTGATCGAAGCTCTGACACATGAAGACAATGAACCTTGATGGCACATTTGGCCTCGAAGACTATCTCGTGGGTATGCCAGAGCCGAA  
AACCAGGCAAATCCACGTACTGGTGGTGAATCCGGCTGGTAATTCGCTGACATTGGTGTAACTCCTTCCAGATTGCTGAAATATAA  
GCGTACGTATTCTCGACCCAAGCTGTTTGAATATGTTGTTGCTAAAAGGTTTTGTGCAGAGCAGGATACAGACGCTGGATCGTACGTG  
CGCAATTCATCTCAATTCTTATATCGATTATCGCTACCATCATTGATGTGTGCATACGGGCAGAAATCCAACCGACGAAAAAGGATGTC  
TAGCAGCTGATGTTCCGCATTTCTGTGTTACTTGGCTGGTGTTCCTCTGGCGTAATAGCTGTCCAAATATTTTTGAACTTTGCA  
AAATTAAGCTTGACGGTAAAATCAATGACGCTAGCGACCAGACACTTATCAAGCCATTTAAGAAATGACCGACCTGACTTTTTGTTG  
CTGAAGCGCAGCACATTGCAGCTGTCTGTTTCTGAAGATCAGCGATAACCTCAACAACCTTATAGGGCACAAAGAGAAACAGAGGA  
AGAGAAATTAGGTAAATTAATGAAAGAATTGTGGCTTTAA

>PhCRN18\_703 PLHAL7032034

ATTCCAGAATCAACCAGCTCGAGTAATGATGGTAAATCTGTTGTGTGCGATTGTTGGTGCGGCAAGTTATGCGTTTGAGGTGAACAT  
TGACGATACTGCGTCAGTATCGGCTTTGAAGAAGGCAGTAAAAGCGGAGAATCCAGACACGATCAAGTGCGAAGCAGCTAAGTTGGA  
GCTTTTTCTAGCCAAGACAGAGGGCGGCGCGTGGTTGGATTCTACCACCGACGATGTGAAGAAGCTGAAGAAGGGCGAAAAGACTGC  
TTTGATCGAAGCTCTGACACATGAAGACAATGAACCTTGATGGCACATTTGGCCTCGAAGACTATCTCGTGGGTATGCCAGAGCCGAA  
AACCAGGCAAATCCACGTACTGGTGGTGATTCCGGCTGGTAATTCGGCTGACATTGGTGTAACCTCCTTCCAGATTGCTGAAATATAA  
GCGTACGTATTCTCGACCCAAGCTGTTTGAATATGTTGTTGCTAAAAGGTTTTGTGCAGAGCAGGATACAGACGCTGGATCGTACGTG  
CGCAATTCATCTCAATTCTTATATCGATTATCGCTACCATCATTGATGTGTCATACGGGCAGAAATCCAACCGACGAAAAAGGATGTC  
TAGCAGCTGATGTTCCGCATTTTCGTGTGTTACTTGGCTGGTGTTCCTCTGGCGCTAATAGCTGTCCAAATATTTTTGAACTTTGCA  
AAATTAAGCTTGACGGTAAAATCAATGACGCTAGCGACCAGACACTTTATCAAGCCATTTAAGAAATGACCGACCTGACTTTTTGTTG  
CTGAAGCGCAGCACATTGCAGCTGTCTGTTTCTGAAGATCAGCGATAACCTCAACAACCTTTATAGGGCACAAAGAGAAACAGAGGA  
AGAGAAATTAGGTAAATTAATGAAAGAATTGTGGCTTTAA

>PhCRN18\_710 PLHAL7101728

ATTCCAGAATCAACCAGCTCGAGTAATGATGGTAAATCTGTTGTGTGCGATTGTTGGTGCGGCAAGTTATGCGTTTGAGGTGAACAT  
TGACGATACTGCGTCAGTATCGGCTTTGAAGAAGGCAGTAAAAGCGGAGAATCCAGACACGATCAAGTGCGAAGCAGCTAAGTTGGA  
GCTTTTTCTAGCCAAGACAGAGGGCGGCGCGTGGTTGGATTCTACCACCGACGATGTGAAGAAGCTGAAGAAGGGCGAAAAGACTGC  
TTTGATCGAAGCTCTGACACATGAAGACAATGAACCTTGATGGCACATTTGGCCTCGAAGACTATCTCGTGGGTATGCCAGAGCCGAA  
AACCAGGCAAATCCACGTACTGGTGGTGATTCCGGCTGGTAATTCGGCTGACATTGGTGTAACCTCCTTCCAGATTGCTGAAATATAA  
GCGTACGTATTCTCGACCCAAGCTGTTTGAATATGTTGTTGCTAAAAGGTTTTGTGCAGAGCAGGATACAGACGCTGGATCGTACGTG  
CGCAATTCATCTCAATTCTTATATCGATTATCGCTACCATCATTGATGTGTCATACGGGCAGAAATCCAACCGACGAAAAAGGATGTC  
TAGCAGCTGATGTTCCGCATTTTCGTGTGTTACTTGGCTGGTGTTCCTCTGGCGCTAATAGCTGTCCAAATATTTTTGAACTTTGCA  
AAATTAAGCTTGACGGTAAAATCAATGACGCTAGCGACCAGACACTTTATCAAGCCATTTAAGAAATGACCGACCTGACTTTTTGTTG  
CTGAAGCGCAGCACATTGCAGCTGTCTGTTTCTGAAGATCAGCGATAACCTCAACAACCTTTATAGGGCACAAAGAGAAACAGAGGA  
AGAGAAATTAGGTAAATTAATGAAAGAATTGTGGCTTTAA

>PhCRN18\_304 PLHAL3042063

ATTCCAGAATCAACCAGCTCGAGTAATGATGGTAAATCTGTTGTGTGCGATTGTTGGTGCGGCAAGTTATGCGTTTGAGGTGAACAT  
TGACGATACTGCGTCAGTATCGGCTTTGAAGAAGGCAGTAAAAGCGGAGAATCCAGACACGATCAAGTGCGAAGCAGCTAAGTTGGA  
GCTTTTTCTAGCCAAGACAGAGGGCGGCGCGTGGTTGGATTCTACCACCGACGATGTGAAGAAGCTGAAGAAGGGCGAAAAGACTGC  
TTTGATCGAAGCTCTGACACATGAAGACAATGAACCTTGATGGCACATTTGGCCTCGAAGACTATCTCGTGGGTATGCCAGAGCCGAA  
AACCAGGCAAATCCACGTACTGGTGGTGATTCCGGCTGGTAATTCGGCTGACATTGGTGTAACCTCCTTCCAGATTGCTGAAATATAA  
GCGTACGTATTCTCGACCCAAGCTGTTTGAATATGTTGTTGCTAAAAGGTTTTGTGCAGAGCAGGATACAGACGCTGGATCGTACGTG  
CGCAATTCATCTCAATTCTTATATCGATTATCGCTACCATCATTGATGTGTCATACGGGCAGAAATCCAACCGACGAAAAAGGATGTC  
TAGCAGCTGATGTTCCGCATTTTCGTGTGTTACTTGGCTGGTGTTCCTCTGGCGCTAATAGCTGTCCAAATATTTTTGAACTTTGCA  
AAATTAAGCTTGACGGTAAAATCAATGACGCTAGCGACCAGACACTTTATCAAGCCATTTAAGAAATGACCGACCTGACTTTTTGTTG  
CTGAAGCGCAGCACATTGCAGCTGTCTGTTTCTGAAGATCAGCGATAACCTCAACAACCTTTATAGGGCACAAAGAGAAACAGAGGA  
AGAGAAATTAGGTAAATTAATGAAAGAATTGTGGCTTTAA

>PhCRN18\_700 PLHAL7002549

ATTCCAGAATCAACCAGCTCGAGTAATGATGGTAAATCTGTTGTGTGCGATTGTTGGTGCGGCAAGTTATGCGTTTGAGGTGAACAT  
TGACGATACTGCGTCAGTATCGGCTTTGAAGAAGGCAGTAAAAGCGGAGAATCCAGACACGATCAAGTGCGAAGCAGCTAAGTTGGA  
GCTTTTTCTAGCCAAGACAGAGGGCGGCGCGTGGTTGGATTCTACCACCGACGATGTGAAGAAGCTGAAGAAGGGCGAAAAGACTGC  
TTTGATCGAAGCTCTGACACATGAAGACAATGAACCTTGATGGCACATTTGGCCTCGAAGACTATCTCGTGGGTATGCCAGAGCCGAA  
AACCAGGCAAATCCACGTACTGGTGGTGATTCCGGCTGGTAATTCGGCTGACATTGGTGTAACCTCCTTCCAGATTGCTGAAATATAA  
GCGTACGTATTCTCGACCCAAGCTGTTTGAATATGTTGTTGCTAAAAGGTTTTGTGCAGAGCAGGATACAGACGCTGGATCGTACGTG  
CGCAATTCATCTCAATTCTTATATCGATTATCGCTACCATCATTGATGTGTCATACGGGCAGAAATCCAACCGACGAAAAAGGATGTC  
TAGCAGCTGATGTTCCGCATTTTCGTGTGTTACTTGGCTGGTGTTCCTCTGGCGCTAATAGCTGTCCAAATATTTTTGAACTTTGCA  
AAATTAAGCTTGACGGTAAAATCAATGACGCTAGCGACCAGACACTTTATCAAGCCATTTAAGAAATGACCGACCTGACTTTTTGTTG  
CTGAAGCGCAGCACATTGCAGCTGTCTGTTTCTGAAGATCAGCGATAACCTCAACAACCTTTATAGGGCACAAAGAGAAACAGAGGA  
AGAGAAATTAGGTAAATTAATGAAAGAATTGTGGCTTTAA

>PhCRN18\_730 PLHAL7302011

ATTCCAGAATCAACCAGCTCGAGTAATGATGGTAAATCTGTTGTGTGCGATTGTTGGTGCGGCAAGTTATGCGTTTGAGGTGAACAT  
TGACGATACTGCGTCAGTATCGGCTTTGAAGAAGGCAGTAAAAGCGGAGAATCCAGACACGATCAAGTGCGAAGCAGCTAAGTTGGA  
GCTTTTTCTAGCCAAGACAGAGGGCGGCGCGTGGTTGGATTCTACCACCGACGATGTGAAGAAGCTGAAGAAGGGCGAAAAGACTGC  
TTTGATCGAAGCTCTGACACATGAAGACAATGAACCTTGATGGCACATTTGGCCTCGAAGACTATCTCGTGGGTATGCCAGAGCCGAA  
AACCAGGCAAATCCACGTACTGGTGGTGATTCCGGCTGGTAATTCGGCTGACATTGGTGTAACCTCCTTCCAGATTGCTGAAATATAA  
GCGTACGTATTCTCGACCCAAGCTGTTTGAATATGTTGTTGCTAAAAGGTTTTGTGCAGAGCAGGATACAGACGCTGGATCGTACGTG  
CGCAATTCATCTCAATTCTTATATCGATTATCGCTACCATCATTGATGTGTCATACGGGCAGAAATCCAACCGACGAAAAAGGATGTC  
TAGCAGCTGATGTTCCGCATTTTCGTGTGTTACTTGGCTGGTGTTCCTCTGGCGCTAATAGCTGTCCAAATATTTTTGAACTTTGCA  
AAATTAAGCTTGACGGTAAAATCAATGACGCTAGCGACCAGACACTTTATCAAGCCATTTAAGAAATGACCGACCTGACTTTTTGTTG  
CTGAAGCGCAGCACATTGCAGCTGTCTGTTTCTGAAGATCAGCGATAACCTCAACAACCTTTATAGGGCACAAAGAGAAACAGAGGA  
AGAGAAATTAGGTAAATTAATGAAAGAATTGTGGCTTTAA

>PhCRN19\_100 PLHAL100A12404

GGTGTCAATCAACCACGCAAGTCTATGTGACACGCCTTCATTTCCGCTTAGATACGAACAGAAATTTTCTCCCTTTCATTTTCATTT  
CCGAATCCGCCGGCTCGAAGAAAGTTGTTGACGCTGTACTGTGCTGTTGTTGGTGAGGTGGGAAGCGGTTTCCCGTGGACATCGAT  
GCGAGCCTTTCGGTGGGCCATTTGAAAGATGCGATCAAGAATAAGAAGCTTGATGACCCAACCTTAAGGAATGTCGCTCCGAAGAAC  
CTGCAGCTATTTCTGGCGAAGAAAGACAAGGGCCATGGCGCGTGGGTGACGGAAGAAGAGCGATGAGGGGTGTGGATGACACAAC  
GATCTGAAATTAATAAAATCAGCGGAGCGGCAATCGGTGATGTTGGGCTTTCAGAAAGATGAAGTGCGGATTCAGTGAGCAAAGAA  
GAAGTGGAGGATCTGAAGGGCCCTGTTACGCTGCTGGTGGTGGTTCGGACCGAAGTAGCTGTAGCTCCACCAAGAAAGCGAGTTAAA

ATGTTGCCAGAAGAAGTTAAGCCCCAAGTTTGTTCGCTAATCGCCGTGTCTGGTCCGCTTTTTTGTATGGAAGATGGTTCGCATCATT  
TGCGATCGAGTTGATCGCCCTGAGAACGTCCGTCCCTTGACGTTGCTCATCCCATCTTTAGCGAGTTTGTGGGTGGGTGTCAAGGAA  
AGATTGAAATAACCCGGTGAAGACGTGACTTTTTGCAGAAAATGTTGCAA

>PhCRN19\_334 PLHAL3342408

GTTTTCAAAGCTTCTTCAACAACAGCTGCGGTTTTTAAAGACGCTATCTTTAGACGCCCTCTGGTTCGAGGAAGACCTCCTTCGTACC  
TTCAAACACCCGCACATAGCAACAGTGGGATTATATGCAAAGGAGGATTTATTCGAAGCGAAAAATCATGCTAACCTCGTTGAGCGCAG  
CACATTACGTCCGCATTTTTTTCTTATCGCCAGGTGTCATTCAACCACGCAAGTCTATGTGACACGCCTTCATTTCCGCTTAGATACG  
AACAGAAATTTTCTCCCTTTCAATTTTCATTTCCGAATCCGCCGGCTCGAAGAAAAGTTGTTGACGCTGTACTGTGCTGTTGTTGGTGA  
GGTGGGAAGCGCGTTTTCCCGTGGACATCGATGCGAGCCTTTCCGTGGGCCATTTGAAAGATGCGATCAAGAATAAGAACTTGGATGA  
CCCAACTTTAAGGAATGTCGCTCCGAAGAACCTGCAGCTATTTCTGGCGAAGAAAAGACAAGGGCCATGGCGCGTGGGTGACGGAAGA  
AGAAGCGATGAGGGGTGTGGATGACACAACCTGATCTGAAATTAATAAAATCAGCGCGAGCGGCAATCGGTGATGTTGGGCTTTCAGA  
AGATGAAGTGCAGGATTCAAGTGAAGCAAAAGAAGTGGAGGATCTGAAGGGCCCTGTTACAGTGTGGTGGTGGTTCGACCGAAGT  
AGCTGTAGCTCCACCAAGAAAGCGAGTTAAAATGTTGCCAGAAGAAGTTAAGCCCCAAGTTTGTTCGCTAATCGCCGTGTCTGGT  
GGCTTTTTTGTATGGAAGATGGTTCGCATCATTTCGATCGAGTTGATCGCCCTGAGAACGTCCGTCCCTTGACGTTGCTCATCCCAT  
TTTAGCGAGTTTGTGGGTGGGTGTCAAGGAAAAGATTGAAAATAACCCGGTGAAGACGTGACTTTTTGCAGAAAATGTTGCAA

>PhCRN19\_703 PLHAL7032149

GTTTTCAAAGCTTCTTCAACAACAGCTGCGGTTTTTAAAGACGCTATCTTTAGACGCCCTCTGGTTCGAGGAAGACCTCCTTCGTACC  
TTCAAACACCCGCACATAGCAACAGTGGGATTATATGCAAAGGAGGATTTATTCGAAGCGAAAAATCATGCTAACCTCGTTGAGCGCAG  
CACATTACGTCCGCATTTTTTTCTTATCGCCAGGTGTCATTCAACCACGCAAGTCTATGTGACACGCCTTCATTTCCGCTTAGATACG  
AACAGAAATTTTCTCCCTTTCAATTTTCATTTCCGAATCCGCCGGCTCGAAGAAAAGTTGTTGACGCTGTACTGTGCTGTTGTTGGTGA  
GGTGGGAAGCGCGTTTTCCCGTGGACATCGATGCGAGCCTTTCCGTGGGCCATTTGAAAGATGCGATCAAGAATAAGAACTTGGATGA  
CCCAACTTTAAGGAATGTCGCTCCGAAGAACCTGCAGCTATTTCTGGCGAAGAAAAGACAAGGGCCATGGCGCGTGGGTGACGGAAGA  
AGAAGCGATGAGGGGTGTGGATGACACAACCTGATCTGAAATTAATAAAATCAGCGCGAGCGGCAATCGGTGATGTTGGGCTTTCAGA  
AGATGAAGTGCAGGATTCAAGTGAAGCAAAAGAAGTGGAGGATCTGAAGGGCCCTGTTACAGTGTGGTGGTGGTTCGACCGAAGT  
AGCTGTAGCTCCACCAAGAAAGCGAGTTAAAATGTTGCCAGAAGAAGTTAAGCCCCAAGTTTGTTCGCTAATCGCCGTGTCTGGT  
GGCTTTTTTGTATGGAAGATGGTTCGCATCATTTCGATCGAGTTGATCGCCCTGAGAACGTCCGTCCCTTGACGTTGCTCATCCCAT  
TTTAGCGAGTTTGTGGGTGGGTGTCAAGGAAAAGATTGAAAATAACCCGGTGAAGACGTGACTTTTTGCAGAAAATGTTGCAA

>PhCRN19\_710 PLHAL7101681

GTTTTCAAAGCTTCTTCAACAACAGCTGCGGTTTTTAAAGACGCTATCTTTAGACGCCCTCTGGTTCGAGGAAGACCTCCTTCGTACC  
TTCAAACACCCGCACATAGCAACAGTGGGATTATATGCAAAGGAGGATTTATTCGAAGCGAAAAATCATGCTAACCTCGTTGAGCGCAG  
CACATTACGTCCGCATTTTTTTCTTATCGCCAGGTGTCATTCAACCACGCAAGTCTATGTGACACGCCTTCATTTCCGCTTAGATACG  
AACAGAAATTTTCTCCCTTTCAATTTTCATTTCCGAATCCGCCGGCTCGAAGAAAAGTTGTTGACGCTGTACTGTGCTGTTGTTGGTGA  
GGTGGGAAGCGCGTTTTCCCGTGGACATCGATGCGAGCCTTTCCGTGGGCCATTTGAAAGATGCGATCAAGAATAAGAACTTGGATGA  
CCCAACTTTAAGGAATGTCGCTCCGAAGAACCTGCAGCTATTTCTGGCGAAGAAAAGACAAGGGCCATGGCGCGTGGGTGACGGAAGA  
AGAAGCGATGAGGGGTGTGGATGACACAACCTGATCTGAAATTAATAAAATCAGCGCGAGCGGCAATCGGTGATGTTGGGCTTTCAGA  
AGATGAAGTGCAGGATTCAAGTGAAGCAAAAGAAGTGGAGGATCTGAAGGGCCCTGTTACAGTGTGGTGGTGGTTCGACCGAAGT  
AGCTGTAGCTCCACCAAGAAAGCGAGTTAAAATGTTGCCAGAAGAAGTTAAGCCCCAAGTTTGTTCGCTAATCGCCGTGTCTGGT  
GGCTTTTTTGTATGGAAGATGGTTCGCATCATTTCGATCGAGTTGATCGCCCTGAGAACGTCCGTCCCTTGACGTTGCTCATCCCAT  
TTTAGCGAGTTTGTGGGTGGGTGTCAAGGAAAAGATTGAAAATAACCCGGTGAAGACGTGACTTTTTGCAGAAAATGTTGCAA

>PhCRN19\_304 PLHAL3042351

GTTTTCAAAGCTTCTTCAACAACAGCTGCGGTTTTTAAAGACGCTATCTTTAGACGCCCTCTGGTTCGAGGAAGACCTCCTTCGTACC  
TTCAAACACCCGCACATAGCAACAGTGGGATTATATGCAAAGGAGGATTTATTCGAAGCGAAAAATCATGCTAACCTCGTTGAGCGCAG  
CACATTACGTCCGCATTTTTTTCTTATCGCCAGGTGTCATTCAACCACGCAAGTCTATGTGACACGCCTTCATTTCCGCTTAGATACG  
AACAGAAATTTTCTCCCTTTCAATTTTCATTTCCGAATCCGCCGGCTCGAAGAAAAGTTGTTGACGCTGTACTGTGCTGTTGTTGGTGA  
GGTGGGAAGCGCGTTTTCCCGTGGACATCGATGCGAGCCTTTCCGTGGGCCATTTGAAAGATGCGATCAAGAATAAGAACTTGGATGA  
CCCAACTTTAAGGAATGTCGCTCCGAAGAACCTGCAGCTATTTCTGGCGAAGAAAAGACAAGGGCCATGGCGCGTGGGTGACGGAAGA  
AGAAGCGATGAGGGGTGTGGATGACACAACCTGATCTGAAATTAATAAAATCAGCGCGAGCGGCAATCGGTGATGTTGGGCTTTCAGA  
AGATGAAGTGCAGGATTCAAGTGAAGCAAAAGAAGTGGAGGATCTGAAGGGCCCTGTTACAGTGTGGTGGTGGTTCGACCGAAGT  
AGCTGTAGCTCCACCAAGAAAGCGAGTTAAAATGTTGCCAGAAGAAGTTAAGCCCCAAGTTTGTTCGCTAATCGCCGTGTCTGGT  
GGCTTTTTTGTATGGAAGATGGTTCGCATCATTTCGATCGAGTTGATCGCCCTGAGAACGTCCGTCCCTTGACGTTGCTCATCCCAT  
TTTAGCGAGTTTGTGGGTGGGTGTCAAGGAAAAGATTGAAAATAACCCGGTGAAGACGTGACTTTTTGCAGAAAATGTTGCAA

>PhCRN19\_700 PLHAL7002856

GTTTTCAAAGCTTCTTCAACAACAGCTGCGGTTTTTAAAGACGCTATCTTTAGACGCCCTCTGGTTCGAGGAAGACCTCCTTCGTACC  
TTCAAACACCCGCACATAGCAACAGTGGGATTATATGCAAAGGAGGATTTATTCGAAGCGAAAAATCATGCTAACCTCGTTGAGCGCAG  
CACATTACGTCCGCATTTTTTTCTTATCGCCAGGTGTCATTCAACCACGCAAGTCTATGTGACACGCCTTCATTTCCGCTTAGATACG  
AACAGAAATTTTCTCCCTTTCAATTTTCATTTCCGAATCCGCCGGCTCGAAGAAAAGTTGTTGACGCTGTACTGTGCTGTTGTTGGTGA  
GGTGGGAAGCGCGTTTTCCCGTGGACATCGATGCGAGCCTTTCCGTGGGCCATTTGAAAGATGCGATCAAGAATAAGAACTTGGATGA  
CCCAACTTTAAGGAATGTCGCTCCGAAGAACCTGCAGCTATTTCTGGCGAAGAAAAGACAAGGGCCATGGCGCGTGGGTGACGGAAGA  
AGAAGCGATGAGGGGTGTGGATGACACAACCTGATCTGAAATTAATAAAATCAGCGCGAGCGGCAATCGGTGATGTTGGGCTTTCAGA  
AGATGAAGTGCAGGATTCAAGTGAAGCAAAAGAAGTGGAGGATCTGAAGGGCCCTGTTACAGTGTGGTGGTGGTTCGACCGAAGT  
AGCTGTAGCTCCACCAAGAAAGCGAGTTAAAATGTTGCCAGAAGAAGTTAAGCCCCAAGTTTGTTCGCTAATCGCCGTGTCTGGT  
GGCTTTTTTGTATGGAAGATGGTTCGCATCATTTCGATCGAGTTGATCGCCCTGAGAACGTCCGTCCCTTGACGTTGCTCATCCCAT  
TTTAGCGAGTTTGTGGGTGGGTGTCAAGGAAAAGATTGAAAATAACCCGGTGAAGACGTGACTTTTTGCAGAAAATGTTGCAA

>PhCRN19\_730 PLHAL7302253

GTTTTCAAAGCTTCTTCAACAACAGCTGCGGTTTTTAAAGACGCTATCTTTAGACGCCCTCTGGTTCGAGGAAGACCTCCTTCGTACC  
TTCAAACACCCGCACATAGCAACAGTGGGATTATATGCAAAGGAGGATTTATTCGAAGCGAAAAATCATGCTAACCTCGTTGAGCGCAG  
CACATTACGTCCGCATTTTTTTCTTATCGCCAGGTGTCATTCAACCACGCAAGTCTATGTGACACGCCTTCATTTCCGCTTAGATACG

AACAGAAATTTTCTCCCTTTCATTTTCATTTCCGAATCCGCCGCTCGAAGAAAGTTGTTGACGCTGTACTGTGCTGTTGTTGGTGA  
GGTGGGAAGCGCGTTTTCCCGTGGACATCGATGCGAGCCTTTCGGTGGGCCATTTGAAAGATGCGATCAAGAATAAGAACTTGGATGA  
CCCAACTTTAAGGAATGTGCTCCGAAGAACCTGCAGCTATTTCTGGCGAAGAAAGACAAGGCCATGGCGCGTGGGTGACGGAAGA  
AGAAGCGATGAGGGGTGTGGATGACACAACCTGATCTGAAATTAATAAATCAGCGCGAGCGCAATCGGTGATGTTGGGCTTTCAGA  
AGATGAAGTGCAGATTCAAGTGAAGAAAGAAAGTGGAGGATCTGAAGGGCCCTGTTACAGTGTGTTGGTGGTTCCGACCGAAGT  
AGCTGTAGCTCCACCAAGAAAGCGAGTTAAAAATGTTGCCAGAAAGAAAGTAAAGCCCCAAGTTTGTTCGCTAATCGCCGTGTCTGGT  
GGCTTTTTTGGATGGAAGATGGTTCGCATCATTTCGCATCGAGTTGATCGCCCTGAGAACGTCCTGTTGACGTTGCTCATCCCATC  
TTTAGCGAGTTTGTGGGTGGGTGTCAAGGAAAGATTGAAATAACCGGTGAAGACGTGACTTTTGCAGAAAATGTTGCAA

>PhCRN20\_100 PLHAL100A12505

CCGGACAACGAAGACCTGGACACGTTGCTTTCAGAGCGAAAATCGACACTTCATCGTATTTGCACATGCGTGCCTGCTGGAAGCTAAGC  
AAGCCGAACCTTTTCGGGCCTGACGTTTCGCTAGGAGAGGACGTAGTTACAGTGTGTTGGTGGTTCCAGAGGGTGTGTTGGTTCA  
GCATTATTGCAGCCAGCGAATAGCGCTACAATTCAAAAATATCGCCTGGTATGGCACGCGTGGATCGATTGTGGAAGGAGAAGGCGTT  
GATCTGAAAGATCCACGAACACTTTCTCGAGCCATTCTCACCGCGGATATCCTCCGCCGACTCGAAGAAACGCATGTCTGCTGGTG  
AAAAGCCCACCAATGACTGGGAAAACGTCACTAGCGACACTTGTGAGCCGATCGTTGGTGGATAGGCATATTATGGACAATAAGAAG  
ATGACTCTGTTCAACTTCTCCGCTTGGCCATACCCGACGATTTCGACATTTGAGCAAGTTTTCAAGAAGCGTTGTACGATCGACTGG  
AGCGAAGCAACTTTAAATCTTCCCACGCCAGATCGTATGGTGTATTTGGTGGTGGACGAAGTACAAGTATCTACAAAGAAGGAACA  
AATCCTCCGAGACGCAAATCCACTGTTTTTTGGGAGCTGGTCAAGTACGTTCTCAGCAACGGGAACACAGCATCAGAATATTGATG  
TTTGCAGCGTATGGATCTGGTGTGGAGTACACGCGACTCGCTACTCCAATACAGTTCGACGATAGGATTGTGTTGGGCATCGACCAG  
CTGAAATTTAGTCATGCCGAAGTCTCTGAGTACGTCCAAAAGTGGTTTAAAGGTATCACGTGCTTTGAAGGATCATCGTCATCTGCG  
ATGAAGGATTTCTGTGCCAATTTGGAAGAGGTGACGGGTAGGCACGTTGGTCTGTGTGCGACTACCATCTTTGAAGTGAATAGAGTC  
CATGCCTCACGTAATAGGAGTGCAGTGTCAACCATTGCCAGCCGAGTGGATCCGCATGCTGCAAAGTGGTCACTGTATGAAGCC  
AACGATAAAGCGCTGTTTTAAAGCGCTGACATCAACACGCGCTGTGAAGGTGTTAAATACCCCTTGACAAGGACGAGCTGGATCGGCTA  
GAACGCATTGCTTATGGTGCCAATCTGATTTTGGTACTGATATAGTTGAGCAATGTCTTCGAAAGGGCATTCTTGTCAAACCTGAG  
CGGCGTTTTGAGTTCTCGTACCAGTGTATGTGGCGATTCTTTGTCAAGATGCGCGTTGGTTCACATCGTCCGAGCACTTCATGTCCCC  
AAAACCTTCCAGAGATGGTTCGCTCGAGTGTGCGATCGATCGATTATGATAGCATCCGCCAGACGCTTGGCAGAAGTTTGTGCGAGC  
GATATTCCTCTGGAAGAGCGCTGGCAAATGGAATTTTACAAGGCTGCGTATCGTGCACACCAAGCACTTTCGTGACGCTGCGGAT  
GTGGGTGCGTTGTTGGATCCAGTGGGTTCTGCTGATTTTACAATTCATGGAGGTGACATCTTTTGGGGCATCGAGTTGTTGCGAGAA  
GCCAGCAACTTGGCTGAACACATCAAACGATTTTCCCCTGGTGGTGCCTATTCCTCGTCCCCTTGACCGAGTCTGTCTGGTTGAC  
TTTAGACGTGTTGCTTCGATTGACGATGTGCCGATTGAACGTATAGCGGAAAATATGCGCGACTGCGACAAGCTCTTCGTGCTGTGT  
TATGACGCACGGATGGCAGGTGTTATGGTGTATTAATCCGCAATGGATGTGCTCTACAGGACTCAATCTTAAAAAAGTTTTGTGATC  
TTGCCAATTTGGTTGTTGCATTTGAAAACCTTGATGCCATTGATGAAGAAAATAAAGGTGAACCTTTTGGAGTCTACCGCATCGATTAA  
TTTTTCATTCTAACAAATATAAAGTTAGTAATATACTTAGATGG

>PhCRN20\_334 PLHAL3341451

CCGGACAACGAAGACCTGGACACGTTGCTTTCAGAGCGAAAATCGACACTTCATCGTATTTGCACATGCGTGCCTGCTGGAAGCTAAGC  
AAGCCGAACCTTTTCGGGCCTGACGTTTCGCTAGGAGAGGACGTAGTTACAGTGTGTTGGTGGTTCCAGAGGGTGTGTTGGTTCA  
GCATTATTGCAGCCAGCGAATAGCGCTACAATTCAAAAATATCGCCTGGTATGGCACGCGTGGATCGATTGTGGAAGGAGAAGGCGTT  
GATCTGAAAGATCCACGAACACTTTCTCGAGCCATTCTCACCGCGGATATCCTCCGCCGACTCGAAGAAACGCATGTCTGCTGGTG  
ACAAGCCCACCAATGACTGGGAAAACGTCACTAGCGACACTTGTGAGCCGATCGTTGGTGGATAGGCATATTATGGACAATAAGAAG  
ATGACTCTGTTCAACTTCTCCGCTTGGCCATACCCGACGATTTCGACATTTGAGCAAGTTTTCAAGAAGCGTTGTACGATCGACTGG  
AGCGAAGCAACTTTAAATCTTCCCACGCCAGATCGTATGGTGTATTTGGTGGTGGACGAAGTACAAGTATCTACAAAGAAGGAACA  
AATCCTCCGAGACGCAAATCCACTGTTTTTTGGGAGCTGGTCAAGTACGTTCTCAGCAACGGGAACACAGCATCAGAATATTGATG  
TTTGCAGCGTATGGATCTGGTGTGGAGTACACGCGACTCGCTACTCCAATACAGTTCGACGATAGGATTGTGTTGGGCATCGACCAG  
CTGAAATTTAGTCATGCCGAAGTCTCTGAGTACGTCCAAAAGTGGTTTAAAGGTATCACGTGCTTTGAAGGATCATCGTCATCTGCG  
ATGAAGGATTTCTGTGCCAATTTGGAAGAGGTGACGGGTAGGCACGTTGGTCTGTGTGCGACTACCATCTTTGAACTGAATAGAGTC  
CATGCCTCACGTAATAGGAGTGCAGTGTGCAACATTCGACCGGATGGATGGATCGCATGCTGCAAAGTGGTCACTGTATGATGAGCC  
AACGATAAAGCGCTGTTTAAAGCGCTGACATCAACACGCGCTGTGAAGGTGTTAAATACCCCTTGACAAGGACGAGCTGGATCGGCTA  
GAACGCATTGCTTATGGTGCCAATCTGATTTTGGTACTGATATAGTTGAGCAATGTCTTCGAAAGGGCATTCTTGTCAAACCTGAG  
CGGCGTTTTGAGTTCTCGTACCAGTGTATGTGGCGATTCTTTGTCAAGATGCGCGTTGGTTCACATCGTCCGAGCACTTCATGTCCCC  
AAAACCTTCCAGAGATGGTTCGCTCGAGTGTGCGATCGATCGATTATGATAGCATCCGCCAGACGCTTGGCAGAAGTTTGTGCGAGC  
GATATTCCTCTGGAAGAGCGTGGCAAATGGAATTTTACAAGGCTGCGTATCGTGCACACCAAGCACTTTCGTGACGCTGCGGAT  
GTGGGTGCGTTGTTGGATCCAGTGGGTTCTGCTGATTTTACAATTCATGGAGGTGACATCTTTTGGGGCATCGAGTTGTTGCGAGAA  
GCCAGCAACTTGGCTGAACACATCAAACGATTTTCCCCTGGTGGTGCCTATTCCTCGTCCCCTTGACCGAGTCTGTCTGGTTGAC  
TTTAGACGTGTTGCTTCGATTGACGATGTGCCGATTGAACGTATAGCGGAAAATATGCGCGACTGCGACAAGCTCTTCGTGCTGTGT  
TATGACGCACGGATGGCAGGTGTTATGGTGTATTAATCCGCAATGGATGTGCTCTACAGGACTCAATCTTAAAAAAGTTTTGTGATC  
TTGCCAATTTGGTTGTTGCATTTGAAAACCTTGATGCCATTGATGAAGAAAATAAAGGTGAACCTTTTGGAGTCTACCGCATCGATTAA  
TTTTTCATTCTAACAAATATAAAGTTAGTAATATACTTAGATGG

>PhCRN20\_703 PLHAL7032332

CCGGACAACGAAGACCTGGACACGTTGCTTTCAGAGCGAAAATCGACACTTCATCGTATTTGCACATGCGTGCCTGCTGGAAGCTAAGC  
AAGCCGAACCTTTTCGGGCCTGACGTTTCGCTAGGAGAGGACGTAGTTACAGTGTGTTGGTGGTTCCAGAGGGTGTGTTGGTTCA  
GCATTATTGCAGCCAGCGAATAGCGCTACAATTCAAAAATATCGCCTGGTATGGCACGCGTGGATCGATTGTGGAAGGAGAAGGCGTT  
GATCTGAAAGATCCACGAACACTTTCTCGAGCCATTCTCACCGCGGATATCCTCCGCCGACTCGAAGAAACGCATGTCTGCTGGTG  
AAAAGCCCACCAATGACTGGGAAAACGTCACTAGCGACACTTGTGAGCCGATCGTTGGTGGATAGGCATATTATGGACAATAAGAAG  
ATGACTCTGTTCAACTTCTCCGCTTGGCCATACCCGACGATTCGACATTTGAGCAAGTTTTCAAGAAGCCTTGTACGATCGACTGG  
AGCGAAGCAACTTTAAATCTTCCCACGCCAGATCGTATGGTGTATTTGGTGGTGGACGAAGTACAAGTATCTACAAAGAAGGAACA  
AATCCTCCGAGACGCAAATCCACTGTTTTTTGGGAGCTGGTCAAGTACGTTCTCAGCAACGGGAACACAGCATCAGAATATTGATG  
TTTGCAGCGTATGGATCTGGTGTGGAGTACACGCGACTCGCTACTCCAATACAGTTCGACGATAGGATTGTGTTGGGCATCGACCAG

CTGAAATTTAGTCATGCCGAAGTCTCTGAGTACGTCCAAAAGTGGTTTAAGGGTATCACGTGCTTTGAAGGATCATCGTCATCTGCG  
ATGAAGGATTTCTGTGCCAATTTGGAAGAGGTGACGGGTAGGCACGTTGGTCTGTGTGCGACTACCATCTTTGAACTGAATAGAGTC  
CATGCCTCACGTAATAGGAGTGCAGTTCGCAACCAATTGCCAGCCGAGTGGATCCGCATGCTGCAAAGTGGGTCACTGTATGAAGCC  
AACGATAAAGCGCTGTTTAAAGCGCTGACATCAACACGCGCTGTGAAGGTGTTAAATACCCTTGACAAGGACGAGCTGGATCGGCTA  
GAACGCATTGCTTATGGTGCCAACCTCTGATTTTGATACTGATATAGTTGAGCAATGTCTTCGAAAGGGCATTCTTGTTCAAACTGAG  
CGGCGTTTTGAGTTCTCGTCACCAGTGATGTGGCGATTCTTTGTCAAGATGCGCGTTGGTTCACATCGTCCGAGCATTTCATGTCCCC  
AAAACCTTTCCAGAGATGGTTCGCTCGAGTGCATGCGATTCGATTATGATAGCATCCGCCAGACGCTTGGCAGAAGTTTGTGCGAGC  
GATATTCCTCTGGAAAGAGCGTGGCAAATGGAATTTTACAAGGCTGCGTATCGCTGCACACCAAGCACTTTCGTGACGTCCTGCGGAT  
GTGGGTGCGTTGTTTGGATCCAGTGGGTTTCGTTCGATTTTACAATTCATGGAGGTGACATCTTTTGGGGCATCGAGTTGTTGCGAGAA  
GCCAGCAACTTGGCTGAACACATCAAACGATTTTCCCCTGGTGGTTCGCTATTCCTCGCTCCCCTTGACCGAGTTCTGTCTGGTTGAC  
TTTAGACGTGTTGCTTCGATTGACGATGTGCCGATTGAACGTATAGCGGAAAATATGCGCGACTGCGACAAGCTCTTCGTCTGGTTGAT  
TATGACGCACGGATGGCAGGTGTTATGGTGATTAATTCGCAATGGATGTCGCTACAGGACTCAATCTTAAAAAAGTTTTGTGATC  
TTGCCAATTTGGTTGTTGCATTTGAAAACCTTGATGCCATTGATGAAGAAAATAAGGTGAACTTTTTGAGGTCTACCGCATCGATTAA  
TTTTTCATTCTAACAAATATAAAGTTAGTAATATACTTAGATGG

>PhCRN20\_710 PLHAL7102214

CCGGACAACGAAGACCTGGACACGTTGCTTCAGAGCGAAAATCGACACTTCATCGTATTTGCACATGCGTGCGTCTGGAAGCTAAGC  
AAGCCGAACCTTTTTCGGGCCTGACGTTTCGCTAGGAGAGGACGTAGTTACAGTGCTGGTGGTGGTTCCAGAGGGTCTGTGGTTCA  
GCATTATTGCAGCCAGCGAATAGCGCTACAATTCAAAATATCGCCTGGTATGGCACGCGTGGATCGATTGTGGAAGGAGAAGGCGTT  
GATCTGAAAGATCCACGAACACTTTCTCGAGCCATTCTCACCGCGGATATCTCCGCCGACTCGAAGAAACGCATGTCCTGCTGGTG  
ACAAGCCCACCAATGACTGGGAAAACGTCCTAGCGACACTTGTGAGCCGATCGTTGGTGGATAGGCATATTATGGACAATAAGAAG  
ATGACTCTGTTCAACTTCTCCGCTTGGCCATACCCGACGATTTCGACATTTGAGCAAGTTTTCAAGAAGCGTTGTACGATCGACTGG  
AGCGAAGCAACTTTAAATCTTCCCACGCCAGATCGTATGGTGTATTTGGTGGTGGACGAAGTACAAGTATCTACAAAGAAGGAACA  
AATCCTCCGAGACGCAAATCCACTGTTTTTTGGGAGCTGGTCAAGTACGTTCTCAGCAACGGGAACCTACAGCATCAGAATATTGATG  
TTTTGCAGCGTATGGATCTGGTGTGGAGTACACGCGACTCGCTACTCCAATACAGTTCGACGATAGGATTGTGTTGGGCATCGACCAG  
CTGAAATTTAGTCATGCCGAAGTCTCTGAGTACGTCCAAAAGTGGTTTAAGGGTATCACGTGCTTTGAAGGATCATCGTCATCTGCG  
ATGAAGGATTTCTGTGCCAATTTGGAAGAGGTGACGGGTAGGCACGTTGGTCTGTGTGCGACTACCATCTTTGAACTGAATAGAGTC  
CATGCCTCACGTAATAGGAGTGCAGTTCGCAACCAATTGCCAGCCGAGTGGATCCGCATGCTGCAAAGTGGGTCACTGTATGAAGCC  
AACGATAAAGCGCTGTTTAAAGCGCTGCATCAACACGCGCTGTGAAGGTGTTAAATACCCTTGACAAGGACGAGCTGGATCGGCTA  
GAACGCATTGCTTATGGTGGCAACTCTGATTTTGATACTGATATAGTTGAGCAATGTCTTCGAAAGGGCATTCTTGTTCAAACTGAG  
CGGCGTTTTGAGTTCTCGTCACCAGTGATGTGGCGATTCTTTGTCAAGATGCGCGTTGGTTCACATCGTCCGAGCATTTCATGTCCCC  
AAAACCTTTCCAGAGATGGTTCGCTCGAGTGCATGCGATTCGATTATGATAGCATCCGCCAGACGCTTGGCAGAAGTTTGTGCGAGC  
GATATTCCTCTGGAAAGAGCGTGGCAAATGGAATTTTACAAGGCTGCGTATCGCTGCACACCAAGCACTTTCGTGACGTCCTGCGGAT  
GTGGGTGCGTTGTTTGGATCCAGTGGGTTTCGTTCGATTTTACAATTCATGGAGGTGACATCTTTTGGGGCATCGAGTTGTTGCGAGAA  
GCCAGCAACTTGGCTGAACACATCAAACGATTTTCCCCTGGTGGTTCGCTATTCCTCGCTCCCCTTGACCGAGTTCTGTCTGGTTGAC  
TTTAGACGTGTTGCTTCGATTGACGATGTGCCGATTGAACGTATAGCGGAAAATATGCGCGACTGCGACAAGCTCTTCGTCTGTGTGT  
TATGACGCACGGATGGCAGGTGTTATGGTGATTAATTCGCAATGGATGTCGCTACAGGACTCAATCTTAAAAAAGTTTTGTGATC  
TTGCCAATTTGGTTGTTGCATTTGAAAACCTTGATGCCATTGATGAAGAAAATAAGGTGAACTTTTTGAGGTCTACCGCATCGATTAA  
TTTTTCATTCTAACAAATATAAAGTTAGTAATATACTTAGATGG

>PhCRN20\_304 PLHAL3042491

CCGGACAACGAAGACCTGGACACGTTGCTTCAGAGCGAAAATCGACACTTCATCGTATTTGCACATGCGTGCGTCTGGAAGCTAAGC  
AAGCCGAACCTTTTTCGGGCCTGACGTTTCGCTAGGAGAGGACGTAGTTACAGTGCTGGTGGTGGTTCCAGAGGGTCTGTGGTTCA  
GCATTATTGCAGCCAGCGAATAGCGCTACAATTCAAAATATCGCCTGGTATGGCACGCGTGGATCGATTGTGGAAGGAGAAGGCGTT  
GATCTGAAAGATCCACGAACACTTTCTCGAGCCATTCTCACCGCGGATATCTCCGCCGACTCGAAGAAACGCATGTCCTGCTGGTG  
AAAAGCCCACCAATGACTGGGAAAACGTCCTAGCGACACTTGTGAGCCGATCGTTGGTGGATAGGCATATTATGGACAATAAGAAG  
ATGACTCTGTTCAACTTCTCCGCTTGGCCATACCCGACGATTGCATTTGAGCAAGTTTTCAAGAAGCGTTGTACGATCGACTGG  
AGCGAAGCAACTTTAAATCTTCCCACCCAGATCGTATGGTGTATTTGGTGGTGGCAGGATCAAGTATCTACAAGAAGGAACA  
AATCCTCCGAGACGCAAATCCACTGTTTTTTGGGAGCTGGTCAAGTACGTTCTCAGCAACGGGAACCTACAGCATCAGAATATTGATG  
TTTTGCAGCGTATGGATCTGGTGTGGAGTACACGCGACTCGCTACTCCAATACAGTTCGACGATAGGATTGTGTTGGGCATCGACCAG  
CTGAAATTTAGTCATGCCGAAGTCTCTGAGTACGTCCAAAAGTGGTTTAAGGGTATCACGTGCTTTGAAGGATCATCGTCATCTGCG  
ATGAAGGATTTCTGTGCCAATTTGGAAGAGGTGACGGGTAGGCACGTTGGTCTGTGTGCGACTACCATCTTTGAACTGAATAGAGTC  
CATGCCTCACGTAATAGGAGTGCAGTTCGCAACCAATTGCCAGCCGAGTGGATCCGCATGCTGCAAAGTGGGTCACTGTATGAAGCC  
AACGATAAAGCGCTGTTTAAAGCGCTGACATCAACACGCGCTGTGAAGGTGTTAAATACCCTTGACAAGGACGAGCTGGATCGGCTA  
GAACGCATTGCTTATGGTGCCAACCTCTGATTTTGATACTGATATAGTTGAGCAATGTCTTCGAAAGGGCATTCTTGTTCAAACTGAG  
CGGCGTTTTGAGTTCTCGTCACCAGTGATGTGGCGATTCTTTGTCAAGATGCGCGTTGGTTCACATCGTCCGAGCATTTCATGTCCCC  
AAAACCTTTCCAGAGATGGTTCGCTCGAGTGCATGCGATTCGATTATGATAGCATCCGCCAGACGCTTGGCAGAAGTTTGTGCGAGC  
GATATTCCTCTGGAAAGAGCGTGGCAAATGGAATTTTACAAGGCTGCGTATCGCTGCACACCAAGCACTTTCGTGACGTCCTGCGGAT  
GTGGGTGCGTTGTTTGGATCCAGTGGGTTTCGTTCGATTTTACAATTCATGGAGGTGACATCTTTTGGGGCATCGAGTTGTTGCGAGAA  
GCCAGCAACTTGGCTGAACACATCAAACGATTTTCCCCTGGTGGTTCGCTATTCCTCGCTCCCCTTGACCGAGTTCTGTCTGGTTGAC  
TTTAGACGTGTTGCTTCGATTGACGATGTGCCGATTGAACGTATAGCGGAAAATATGCGCGACTGCGACAAGCTCTTCGTCTGTGTGT  
TATGACGCACGGATGGCAGGTGTTATGGTGATTAATTCGCAATGGATGTCGCTACAGGACTCAATCTTAAAAAAGTTTTGTGATC  
TTGCCAATTTGGTTGTTGCATTTGAAAACCTTGATGCCATTGATGAAGAAAATAAGGTGAACTTTTTGAGGTCTACCGCATCGATTAA  
TTTTTCATTCTAACAAATATAAAGTTAGTAATATACTTAGATGG

>PhCRN20\_700 PLHAL7003053

CCGGACAACGAAGACCTGGACACGTTGCTTCAGAGCGAAAATCGACACTTCATCGTATTTGCACATGCGTGCGTCTGGAAGCTAAGC  
AAGCCGAACCTTTTTCGGGCCTGACGTTTCGCTAGGAGAGGACGTAGTTACAGTGCTGGTGGTGGTTCCAGAGGGTCTGTGGTTCA  
GCATTATTGCAGCCAGCGAATAGCGCTACAATTCAAAATATCGCCTGGTATGGCACGCGTGGATCGATTGTGGAAGGAGAAGGCGTT  
GATCTGAAAGATCCACGAACACTTTCTCGAGCCATTCTCACCGCGGATATCTCCGCCGACTCGAAGAAACGCATGTCCTGCTGGTG

ACAAGCCCACCAATGACTGGGAAAACGTCACTAGCGACACTTGTGAGCCGATCGTTGGTGGATAGGCATATTATGGACAATAAGAAG  
ATGACTCTGTTCAACTTCTCCGCTTGGCCATAACCCGACGATTTCGACATTTGAGCAAGTTTTCAAGAAGCGTTGTACGATCGACTGG  
AGCGAAGCAACTTTAAATCTTCCCACGCCAGATCGTATGGTGTATTTGGTGGTGGACGAAGTACAAGTGATCTACAAAGAAGGAACA  
AATCCTCCGAGACGCAAATCCACTGTTTTTTGGGAGCTGGTCAAGTACGTCTCAGCAACGGGAACCTACAGCATCAGAATATTGATG  
TTTTGCAGCGTATGGATCTGGTGTGGAGTACACGCGACTCGCTACTCCAATACAGTTCGACGATAGGATTGTGTTGGGCATCGACCAG  
CTGAAATTTAGTCATGCCGAAGTCTCTGAGTACGTCCAAAAAGTGGTTTAAAGGGTATCACGTGCTTTGAAGGATCATCGTCATCTGCG  
ATGAAGGATTTCTGTGCCAATTTGGAAGAGGTGACGGGTAGGCACGTTGGTCTGTGTGCGACTACCATCTTTGAACTGAATAGAGTC  
CATGCCTCACGTAATAGGAGTGCAGTTCGTCACCATTTGCCAGCCGAGTGGATCCGCATGCTGCAAAGTGGGTCACTGTATGAAGCC  
AACGATAAAGCGCTGTTTAAAGCGCTGACATCAACACGCGCTGTGAAGGTGTTAAATACCCCTTGACAAGGACGAGCTGGATCGGCTA  
GAACGCATTGCTTATGGTGCCAACTCTGATTTTGATACTGATATAGTTGAGCAATGTCTTCGAAAGGGCATTCTTGTTCAACTGAG  
CGCGTTTTTGGAGTTCTCGTACCAGTGTGTTGGCGATTCTTTGTCAAGATGCGCGTTGGTCAATCGTCCGAGCATTCTATGTCCCC  
AAAACCCCTCCAGAGATGGTTCGCTCGAGTGCATGCGATTCGATTCGATAGCATCCGCCAGACGCTTGGCAGAAGTTTGTGCGAGC  
GATATTCTCTGGAAAGAGCGTGGCAAATGGAATTTTACAAGGCTGCGTATCGCATGCACACCAAGCACTTTTCGTGACGTCTGCGGAT  
GTGGGTGCGTTGTTTGGATCCAGTGGGTTTCGTGCGATTTTACAATTCATGGAGGTGACATCTTTTGGGGCATCGAGTTGTTGCGAGAA  
GCCAGCAACTTGGCTGAACACATCAAACGATTTTCCCTGGTGGTTCGCTATTCTTCGCTCCCGTTGACCGAGTTCTGTCTGGTTGAC  
TTTAGACGTGTTGCTTCGATTGACGATGTGCCGATTGAACGTATAGCGGAAAAATATGCGCGACTGCGACAAGCTCTTCGTGCGTGTGT  
TATGACGCACGGATGGCAGGTGTTATGGTGATTAATTCGCAATGGATGTCGTCTACAGGACTCAATCTTAAAAAAGTTTTGTGATC  
TTGCCAATTTGGTTGTTGCATTTGAAAACCTTGATGCCATTGATGAAGAAAAATAAGGTGAACTTTTTTGAGGTCACCGCATCGATTAA  
TTTTTCATTCTAACAAATATAAAGTTAGTAATATACTTAGATGG

>PhCRN20\_730 PLHAL7301301

CCGGACAACGAAGACCTGGACACGTTGCTTCAGAGCGAAATCGACACTTCATCGTATTTGCACATGCGTGCCTCGTGGAAAGCTAAGC  
AAGCCGAACCTTTTTCGGGCCTGACGTTTCGCTAGGAGAGGACGTAGTTACAGTGCCTGGTGGTGGTTCCAGAGGGTGCCTGTTGGTTCA  
GCATTATTGCAGCCAGCGAATAGCGCTACAATTCAAAATATCGCCTGGTATGGCACGCGTGGATCGATTGTGGAAGGAGAAGGCGTT  
GATCTGAAAGATCCACGAACACTTTCTCGAGCCATTCTCACCGCGGATATCTCCGCCGACTCGAAGAAACGCATGTCCTGCTGGTG  
ACAAGCCCACCAATGACTGGGAAAACGTCACTAGCGACACTTGTGAGCCGATCGTTGGTGGATAGGCATATTATGGACAATAAGAAG  
ATGACTCTGTTCAACTTCTCCGCTTGGCCATAACCCGACGATTTCGACATTTGAGCAAGTTTTCAAGAAGCGTTGTACGATCGACTGG  
AGCGAAGCAACTTTAAATCTTCCCACGCCAGATCGTATGGTGTATTTGGTGGTGGACGAAGTACAAGTGATCTACAAAGAAGGAACA  
AATCCTCCGAGACGCAAATCCACTGTTTTTTTTGGGAGCTGGTCAAGTACGTTCTCAGCAACGGGAACCTACAGCATCAGAATATTGATG  
TTTTGCAGCGTATGGATCTGGTGTGGAGTACACGCGACTCTCCAATACAGTTCGACGATAGGATTGTGTTGGGCATCGACCAG  
CTGAAATTTAGTCATGCCGAAGTCTCTGAGTACGTCCAAAAGTGGTTTTAAGGGTATCACGTGCTTTGAAGGATCATCGTCATCTGCG  
ATGAAGGATTTCTGTGCCAATTTGGAAGAGGTGACGGGTAGGCACGTTGGTCTGTGTGCGACTACCATCTTTGAACTGAATAGAGTC  
CATGCCTCACGTAATAGGAGTGCAGTTCGTCACCATTTGCCAGCCGAGTGGATCCGCATGCTGCAAAGTGGGTCACTGTATGAAGCC  
AACGATAAAGCGCTGTTTAAAGCGCTGACATCAACACGCGCTGTGAAGGTGTTAAATACCCCTTGACAAGGACGAGCTGGATCGGCTA  
GAACGCATTGCTTATGGTGCCAACTCTGATTTTGATACTGATATAGTTGAGCAATGTCTTCGAAAGGGCATTCTTGTTCAACTGAG  
CGGCGTTTTTGGAGTTCTCGTACCAGTGTGTTGGCGATTCTTTGTCAAGATGCGCGTTGGTCAATCGTCCGAGCATTCTATGTCCCC  
AAAACCCCTCCAGAGATGGTTCGCTCGAGTGCATGCGATTCGATTCGATTCGATAGCATCCGCCAGACGCTTGGCAGAAGTTTGTGCGAGC  
GATATTCTCTGGAAAGAGCGTGGCAAATGGAATTTTACAAGGCTGCGTATCGTGCACACCAAGCACTTTTCGTGACGTCTGCGGAT  
GTGGGTGCGTTGTTTGGATCCAGTGGGTTTCGTGCGATTTTACAATTCATGGAGGTGACATCTTTTGGGGCATCGAGTTGTTGCGAGAA  
GCCAGCAACTTGGCTGAACACATCAAACGATTTTCCCTGGTGGTTCGCTATTCTTCGCTCCCGTTGACCGAGTTCTGTCTGGTTGAC  
TTTAGACGTGTTGCTTCGATTGACGATGTGCCGATTGAACGTATAGCGGAAAAATATGCGCGACTGCGACAAGCTCTTCGTGCGTGTGT  
TATGACGCACGGATGGCAGGTGTTATGGTGATTAATTCGCAATGGATGTCGTCTACAGGACTCAATCTTAAAAAAGTTTTGTGATC  
TTGCCAATTTGGTTGTTGCATTTGAAAACCTTGATGCCATTGATGAAGAAAAATAAGGTGAACTTTTTTGAGGTCACCGCATCGATTAA  
TTTTTCATTCTAACAAATATAAAGTTAGTAATATACTTAGATGG

>PhCRN30.1\_100 PLHAL100A10010

GCGAAGAAAGACAAGGGCCGCGCGCGTGGGTGACGGAAGAAGAAGCGATGAGCGGTGTGAATGACACAACCTGATCTGAAGTTACTA  
AAATCTGCGCAGAGCACAATCGGTGATGTTGGGCTTTTCAAGAAGATAAAGTGCAGTTCAGTGCACAAAAAAGTAGTGAAGGATCTG  
AAGGGCCCTGTTACAGTGTAGTGGTGGTTCCGGGGCGTGCAGTGGAGGATGGCGCTTGGAGCGCAAAGGACTTGTCTACTGTGGAC  
CCTCAAGCTCAATCGAAAATGTGGAAGTCAAGTTGTCAGAGTTTCTCAGGAGATGTATGCTCAGGGACAGCGGTGGTTGTGGATCTA  
ACGTCGACGCACTTGTATCTGCTGACAAAACCTGCATTTTTTGGGTTCGACGACACATTCAGTGCATCTGAGTGCCTGACTTCACGACG  
GAAATCAAACGGTATCTGAGACGCCACCCCGGATGAAAAAAGTGAAGGAAAAAAGTGTCAACCAATAATAAGGATGCTGATGTT  
GCAAAGCGACCACGTCGTAATCTCTACGGACGGCAGCAATGAAATCATCAGCTAAATTAGACAAGCCTCAAGTTGTGGTGGAGCAA  
CTCCTTCCCGATAGGCCGAAGCCGGAAGAAGTCAACCGATTCAAGTCTCGACAGTGCATTTGCTGGTGTAGTTCCGGCTGCGTTTCGAC  
TTCGCAATCTTCGAAGTTGTTTTGCCACGAAATAACAAGCTCGACCGATGCGACATGTCCTTCAATGTGTCTTACGGAATGAGTGT  
GACGTGTTCCGTTTTCTTGGCGCTTTTGAAGATCAAGCTTTTGTATCATGCTTATGCCATCATTCAGCTAGAATCACCGTTGGAGC  
GGAAACCGAATGGTTCTCTCTCTTTGTGAGCTCCTGGTGTATCTGGAAGCGGTTAGTGTGCACCAAAAAAGTGAAGTAGCAGCGGGA  
TATCTTGGTGTGGACTTTATGGCTCAGCAAAAAACGAGCGGTATCAATCCTATTTCTACACATTTTACGGAGTAATCCCCGAATTA  
CCGTCTTCGTTGCCGCGATACCGAAGTCCAAAACAAAGGATGAGCTATAGTCTGTATACCGTGTGATGAATGAATGCATCTGCGAGT  
ATCTTTCAATTTAGTGCATGAGCTCATCGAATGTTTTGCATGCGATTGTGGTTGAAATGTAGTGAATGCCATCTGAAGAGTCCGCA  
ACTAATCAATGCTTTTTT

>PhCRN30.1\_334 PLHAL3340246

GCGAAGAAAGACAAGGGCCGCGCGCGTGGGTGACGGAAGAAGAAGCGATGAGCGGTGTGAATGACACAACCTGATCTGAAGTTACTA  
AAATCTGCGCAGAGCACAATCGGTGATGTTGGGCTTTTCAAGAAGATAAAGTGCAGTTCAGTGCACAAAAAAGTAGTGAAGGATCTG  
AAGGGCCCTGTTACAGTGTGGTGGTGGTTCCGGGGCGTGCAGTGGAGGATGGCGCTTGGAGCGCAAAGGACTTGTCTACTGTGGAC  
CCTCAAGCTCAATCGAAAATGTGGAAGTCAAGTTGTCAGAGTTTCTCAGGAGATGTATGCTCAGGGACAGCGGTGGTTGTGGATCTA  
ACGTCGACGCACTTGTATCTGCTGACAAAACCTGCATTTTTTGGGTTCGACGACACATTCAGTGCATCTGAGTGCCTGACTTCACGACG  
GAAATCAAACGGTATCTGAGACGCCACCCCGGATGAAAAAAGTGAAGGAAAAAAGTGTCAACCAATAATAAGGATGCTGATGTT  
GCAAAGCGACCACGTCGTAATCTCTACGGACGGCAGCAATGAAATCATCAGCTAAATTAGACAAGCCTCAAGTTGTGGTGGAGCAA  
CTCCTTCCCGATAGGCCGAAGCCGGAAGAAGTCAACCGATTCAAGTCTCGACAGTGCATTTGCTGGTGTAGTTCCGGCTGCGTTTCGAC  
TTCGCAATCTTCGAAGTTGTTTTGCCACGAAATAACAAGCTCGACCGATGCGACATGTCCTTCAATGTGTCTTACGGAATGAGTGT  
GACGTGTTCCGTTTTCTTGGCGCTTTTGAAGATCAAGCTTTTGTATCATGCTTATGCCATCATTCAGCTAGAATCACCGTTGGAGC  
GGAAACCGAATGGTTCTCTCTCTTTGTGAGCTCCTGGTGTATCTGGAAGCGGTTAGTGTGCACCAAAAAAGTGAAGTAGCAGCGGGA  
TATCTTGGTGTGGACTTTATGGCTCAGCAAAAAACGAGCGGTATCAATCCTATTTCTACACATTTTACGGAGTAATCCCCGAATTA  
CCGTCTTCGTTGCCGCGATACCGAAGTCCAAAACAAAGGATGAGCTATAGTCTGTATACCGTGTGATGAATGAATGCATCTGCGAGT  
ATCTTTCAATTTAGTGCATGAGCTCATCGAATGTTTTGCATGCGATTGTGGTTGAAATGTAGTGAATGCCATCTGAAGAGTCCGCA  
ACTAATCAATGCTTTTTT



GCAAAGCGACCACGTCGTAATCTCTACGGACGGCAGCAATGAAATCATCAGCTAAATTAGACAAGCCTCAAGTTGTGGTGGAGCAA  
CTCCTTCCCGATAGGCCGAAGCCGGAAGAAGTCAACCGATTAGTCTCGACAGTGACATTTGCTGGTGTAGTTCGGCTGCGTTCGAC  
TTCGCAATCTTCAAGTTGTTTTGCCACGAAATAACAAGCTCGACCGATGCGACATGTCTTCAATGTGTCTTACGGAATGAGTGT  
GACGTGTTTCGGTTTTCTGGCGCTTTTGAAGATCAAGCTTTTGCATGCTTATGCCATCATCCAGCTAGAATCACCAGTTGGAGC  
GGAAACCGAATGGTTCTCTCCTCTTTGTGACGCTCCTGGTGTATCTGGAAGCGCGTTAGTGTGCACCAAAAAATGAAGTAGCAGCGGGA  
TATCTTGGTGTGGACTTTATGGCTCAGCAAAAAACGAGCGGTATCAATCCTATTTCTACACATTTACGGAGTAATCCCCGAATTA  
CCGTCTTCGTTGCCGCGATACCGAAGTCCAAACAAAGGATGAGCTATAGTCTGTATAACCGTGTGCATGTAATGAATGCATCTGCGAGT  
ATCTTTCAATTTAGTGTGAGCTCATCGAATGTTTTGCATGCGATTGTGGTTGAAATGTAGTGAATTGCCATCTGAAGAGTCCGCA  
ACTAATCAATGCTTTTTT

>PhCRN30.1\_703 PLHAL7030055

GCGAAGAAAGACAAGGGCCGCGCGCTGGGTGACGGAAGAAGAAGCGATGAGCGGTGTGAATGACACAACCTGATCTGAAGTTACTA  
AAATCTGCGCGAGCGACAATCGGTGATGTTGGGCTTTTCAAGAATAAAGTGCAGATTCAAGTGCCAAAAAAGTAGTGAAGGATCTG  
AAGGGCCCTGTTACAGTGTGGTGGTGGTTCGGGGCGTGCAGTGGAGGATGGCGCTTGGAGCGCAAAGGACTTGTCTACTGTGGAC  
CCTCAAGCTCAATCGAAAATGTGGAAGTCAAGTTGTGACAGTTCCTCAGGAGATGTATGCTCAGGGACAGCGGTGGTTGTGGATCTA  
ACGTCGACGCACTTGTATCTGCTGACAAAACCTGCATTTTTGGGTGACGACACATTTACTGATCACTTGAGTGTGACTTCACGACG  
GAAATCAAACGGTATCTGAGACGCCACCCCGGATGAAAAACAAGTGAAGGAAAAAGAATGTCACCAATAATAAGGATGCTGATGTT  
GCAAAGCGACCACGTCGTAATCTCTACGGACGGCAGCAATGAAATCATCAGCTAAATTAGACAAGCCTCAAGTTGTGGTGGAGCAA  
CTCCTTCCCGATAGGCCGAAGCCGGAAGAAGTCAACCGATTAGTCTCGACAGTGACATTTGCTGGTGTAGTTCGGCTGCGTTCGAC  
TTCGCAATCTTCAAGTTGTTTTGCCACGAAATAACAAGCTCGACCGATGCGACATGTCTTCAATGTGTCTTACGGAATGAGTGT  
GACGTGTTTCGGTTTTCTGGCGCTTTTGAAGATCAAGCTTTTGCATGCTTATGCCATCATCCAGCTAGAATCACCAGTTGGAGC  
GGAAACCGAATGGTTCTCTCCTCTTTGTGACGCTCCTGGTGTATCTGGAAGCGCGTTAGTGTGCACCAAAAAATGAAGTAGCAGCGGGA  
TATCTTGGTGTGGACTTTATGGCTCAGCAAAAAACGAGCGGTATCAATCCTATTTCTACACATTTACGGAGTAATCCCCGAATTA  
CCGTCTTCGTTGCCGCGATACCGAAGTCCAAACAAAGGATGAGCTATAGTCTGTATAACCGTGTGCATGTAATGAATGCATCTGCGAGT  
ATCTTTCAATTTAGTGTGAGCTCATCGAATGTTTTGCATGCGATTGTGGTTGAAATGTAGTGAATTGCCATCTGAAGAGTCCGCA  
ACTAATCAATGCTTTTTT

>PhCRN30.1\_710 PLHAL7100086

GCGAAGAAAGACAAGGGCCGCGCGCTGGGTGACGGAAGAAGAAGCGATGAGCGGTGTGAATGACACAACCTGATCTGAAGTTACTA  
AAATCTGCGCGAGCGACAATCGGTGATGTTGGGCTTTTCAAGAATAAAGTGCAGATTCAAGTGCCAAAAAAGTAGTGAAGGATCTG  
AAGGGCCCTGTTACAGTGTGGTGGTGGTTCGGGGCGTGCAGTGGAGGATGGCGCTTGGAGCGCAAAGGACTTGTCTACTGTGGAC  
CCTCAAGCTCAATCGAAAATGTGGAAGTCAAGTTGTGACAGTTCCTCAGGAGATGTATGCTCAGGGACAGCGGTGGTTGTGGATCTA  
ACGTCGACGCACTTGTATCTGCTGACAAAACCTGCATTTTTGGGTGACGACACATTTACTGATCACTTGAGTGTGACTTCACGACG  
GAAATCAAACGGTATCTGAGACGCCACCCCGGATGAAAAACAAGTGAAGGAAAAAGAATGTCACCAATAATAAGGATGCTGATGTT  
GCAAAGCGACCACGTCGTAATCTCTACGGACGGCAGCAATGAAATCATCAGCTAAATTAGACAAGCCTCAAGTTGTGGTGGAGCAA  
CTCCTTCCCGATAGGCCGAAGCCGGAAGAAGTCAACCGATTAGTCTCGACAGTGACATTTGCTGGTGTAGTTCGGCTGCGTTCGAC  
TTCGCAATCTTCAAGTTGTTTTGCCACGAAATAACAAGCTCGACCGATGCGACATGTCTTCAATGTGTCTTACGGAATGAGTGT  
GACGTGTTTCGGTTTTCTGGCGCTTTTGAAGATCAAGCTTTTGCATGCTTATGCCATCATCCAGCTAGAATCACCAGTTGGAGC  
GGAAACCGAATGGTTCTCTCCTCTTTGTGACGCTCCTGGTGTATCTGGAAGCGCGTTAGTGTGCACCAAAAAATGAAGTAGCAGCGGGA  
TATCTTGGTGTGGACTTTATGGCTCAGCAAAAAACGAGCGGTATCAATCCTATTTCTACACATTTACGGAGTAATCCCCGAATTA  
CCGTCTTCGTTGCCGCGATACCGAAGTCCAAACAAAGGATGAGCTATAGTCTGTATAACCGTGTGCATGTAATGAATGCATCTGCGAGT  
ATCTTTCAATTTAGTGTGAGCTCATCGAATGTTTTGCATGCGATTGTGGTTGAAATGTAGTGAATTGCCATCTGAAGAGTCCGCA  
ACTAATCAATGCTTTTTT

>PhCRN30.1\_304 PLHAL3040004

GCGAAGAAAGACAAGGGCCGCGCGCTGGGTGACGGAAGAAGAAGCGATGAGCGGTGTGAATGACACAACCTGATCTGAAGTTACTA  
AAATCTGCGCGAGCGACAATCGGTGATGTTGGGCTTTTCAAGAATAAAGTGCAGATTCAAGTGCCAAAAAAGTAGTGAAGGATCTG  
AAGGGCCCTGTTACAGTGTGGTGGTGGTTCGGGGCGTGCAGTGGAGGATGGCGCTTGGAGCGCAAAGGACTTGTCTACTGTGGAC  
CCTCAAGCTCAATCGAAAATGTGGAAGTCAAGTTGTGACAGTTCCTCAGGAGATGTATGCTCAGGGACAGCGGTGGTTGTGGATCTA  
ACGTCGACGCACTTGTATCTGCTGACAAAACCTGCATTTTTGGGTGACGACACATTTACTGATCACTTGAGTGTGACTTCACGACG  
GAAATCAAACGGTATCTGAGACGCCACCCCGGATGAAAAACAAGTGAAGGAAAAAGAATGTCACCAATAATAAGGATGCTGATGTT  
GCAAAGCGACCACGTCGTAATCTCTACGGACGGCAGCAATGAAATCATCAGCTAAATTAGACAAGCCTCAAGTTGTGGTGGAGCAA  
CTCCTTCCCGATAGGCCGAAGCCGGAAGAAGTCAACCGATTAGTCTCGACAGTGACATTTGCTGGTGTAGTTCGGCTGCGTTCGAC  
TTCGCAATCTTCAAGTTGTTTTGCCACGAAATAACAAGCTCGACCGATGCGACATGTCTTCAATGTGTCTTACGGAATGAGTGT  
GACGTGTTTCGGTTTTCTGGCGCTTTTGAAGATCAAGCTTTTGCATGCTTATGCCATCATCCAGCTAGAATCACCAGTTGGAGC  
GGAAACCGAATGGTTCTCTCCTCTTTGTGACGCTCCTGGTGTATCTGGAAGCGCGTTAGTGTGCACCAAAAAATGAAGTAGCAGCGGGA  
TATCTTGGTGTGGACTTTATGGCTCAGCAAAAAACGAGCGGTATCAATCCTATTTCTACACATTTACGGAGTAATCCCCGAATTA  
CCGTCTTCGTTGCCGCGATACCGAAGTCCAAACAAAGGATGAGCTATAGTCTGTATAACCGTGTGCATGTAATGAATGCATCTGCGAGT  
ATCTTTCAATTTAGTGTGAGCTCATCGAATGTTTTGCATGCGATTGTGGTTGAAATGTAGTGAATTGCCATCTGAAGAGTCCGCA  
ACTAATCAATGCTTTTTT

>PhCRN30.1\_700 PLHAL7000187

GCGAAGAAAGACAAGGGCCGCGCGCTGGGTGACGGAAGAAGAAGCGATGAGCGGTGTGAATGACACAACCTGATCTGAAGTTACTA  
AAATCTGCGCGAGCGACAATCGGTGATGTTGGGCTTTTCAAGAATAAAGTGCAGATTCAAGTGCCAAAAAAGTAGTGAAGGATCTG  
AAGGGCCCTGTTACAGTGTGGTGGTGGTTCGGGGCGTGCAGTGGAGGATGGCGCTTGGAGCGCAAAGGACTTGTCTACTGTGGAC  
CCTCAAGCTCAATCGAAAATGTGGAAGTCAAGTTGTGACAGTTCCTCAGGAGATGTATGCTCAGGGACAGCGGTGGTTGTGGATCTA  
ACGTCGACGCACTTGTATCTGCTGACAAAACCTGCATTTTTGGGTGACGACACATTTACTGATCACTTGAGTGTGACTTCACGACG  
GAAATCAAACGGTATCTGAGACGCCACCCCGGATGAAAAACAAGTGAAGGAAAAAGAATGTCACCAATAATAAGGATGCTGATGTT  
GCAAAGCGACCACGTCGTAATCTCTACGGACGGCAGCAATGAAATCATCAGCTAAATTAGACAAGCCTCAAGTTGTGGTGGAGCAA  
CTCCTTCCCGATAGGCCGAAGCCGGAAGAAGTCAACCGATTAGTCTCGACAGTGACATTTGCTGGTGTAGTTCGGCTGCGTTCGAC  
TTCGCAATCTTCAAGTTGTTTTGCCACGAAATAACAAGCTCGACCGATGCGACATGTCTTCAATGTGTCTTACGGAATGAGTGT  
GACGTGTTTCGGTTTTCTGGCGCTTTTGAAGATCAAGCTTTTGCATGCTTATGCCATCATCCAGCTAGAATCACCAGTTGGAGC  
GGAAACCGAATGGTTCTCTCCTCTTTGTGACGCTCCTGGTGTATCTGGAAGCGCGTTAGTGTGCACCAAAAAATGAAGTAGCAGCGGGA  
TATCTTGGTGTGGACTTTATGGCTCAGCAAAAAACGAGCGGTATCAATCCTATTTCTACACATTTACGGAGTAATCCCCGAATTA  
CCGTCTTCGTTGCCGCGATACCGAAGTCCAAACAAAGGATGAGCTATAGTCTGTATAACCGTGTGCATGTAATGAATGCATCTGCGAGT  
ATCTTTCAATTTAGTGTGAGCTCATCGAATGTTTTGCATGCGATTGTGGTTGAAATGTAGTGAATTGCCATCTGAAGAGTCCGCA  
ACTAATCAATGCTTTTTT

GACGTGTTTCGGTTTTCTCGCGCTTTTGAAGATCAAGCTTTTGATCATGCTTATGCCATCATTCCAGCTAGAATCACCGTTGGAGC  
GGAAACCGAATGGTTCTCTCCTCTTTGTGCTAGCTCCTGGTGTATCTGGAAGCGCGTTAGTGTGCACCAAAAAATGAAGTAGCAGCGGGA  
TATCTTGGTGCTGGACTTTATGGCTCAGCAAAAAACGAGCGGTATCAATCCTATTTCTACACATTTACGGAGTAATCCCCGAATTA  
CCGTCTTCGTTGCCGCGATACCGAAGTCCAAACAAAGGATGAGCTATAGTCTGTATACCGTGTATGTAATGAATGCATCTGCGAGT  
ATCTTTCAATTTTCAAGTGATGAGCTCATCGAATGTTTTGCATGCGATTGTGGTTGAAATGTAGTGAATTGCCATCTGAAGAGTCGGCA  
ACTAATCAATGCTTTTTTTC

>PhCRN30.1\_730 PLHAL7300008

GCGAAGAAAGACAAGGGCCGCGCGCTGGGTGACGGAAGAAGAAGCGATGAGCGGTGTGAATGACACAACCTGATCTGAAGTTACTA  
AAATCTGCGCGAGCGACAATCGGTGATGTTGGGCTTTCAGAAGATAAAGTGCAGGATCAAGTGCCCAAAAAAGTAGTGAAGGATCTG  
AAGGGCCCTGTTACCGTGGTGGTGGTTCGGGGCGTGCAGTGGAGGATGGCGCTTGGAGCGCAAAGGACTTGTCTACTGTGGAC  
CCTCAAGCTCAATCGAAAATGTGGAAGTCAAGTGTGTCAGAGTTTCTCAGGAGATGTATGCTCAGGGACAGCGGTGGTGTGGATCTA  
ACGTCGACGCACTTGTATCTGCTGACAAAACCTGCATTTTTGGGTCGACGACACATCACTGATCATTGAGTGTGACTTTCACGACG  
GAAATCAAACGGTATCTGAGACGCCACCCCGGATGAAAACAAGTGAAGGAAAAAGAAATGTCACCAATAATAAGGATGCTGATGTT  
GCAAAGCGACCACGTCGTAATCTCTACGGACGGCAGCAATGAAATCATCAGCTAAATTAGACAAGCCTCAAGTTGTGGTGGAGCAA  
CTCCTTCCCGATAGGCCGAAGCCGGAAGAAGTCAACCGATTGAGTCTCGACAGTGCATTTGCTGGTGTAGTTCGGCTGCGTTCGAC  
TTCGCAATCTTCGAAGTTGTTTTGCCACGAAATAACAAGCTCGACCGATGCGACATGTCTTCAATGTGTCTTACGGAATGAGTGT  
GACGTGTTTCGGTTTTCTCGCGCTTTTGAAGATCAAGCTTTTGATCATGCTTATGCCATCATTCCAGCTAGAATCACCGTTGGAGC  
GGAAACCGAATGGTTCTCTCCTCTTTGTGCTAGCTCCTGGTGTATCTGGAAGCGCGTTAGTGTGCACCAAAAAATGAAGTAGCAGCGGGA  
TATCTTGGTGCTGGACTTTATGGCTCAGCAAAAAACGAGCGGTATCAATCCTATTTCTACACATTTACGGAGTAATCCCCGAATTA  
CCGTCTTCGTTGCCGCGATACCGAAGTCCAAACAAAGGATGAGCTATAGTCTGTATACCGTGTATGTAATGAATGCATCTGCGAGT  
ATCTTTCAATTTTCAAGTGATGAGCTCATCGAATGTTTTGCATGCGATTGTGGTTGAAATGTAGTGAATTGCCATCTGAAGAGTCGGCA  
ACTAATCAATGCTTTTTTTC

>PhCRN30.2\_100 PLHAL100A11176

CAATTAAGAAGGAGCAGGAGTTTACTTTCGCGGCCAACAAATTAGAGCTATATCTCGCGAAGAAAGACAAGGGCCGTGGCGCGTGGG  
TGACGGAAGAAGAAGCGAGGGGTTTGAATGGCACAAGTGAATTTGGAGATATTTGGACGTTGCGAGAGCACCCTTAAATTTGTTGGCT  
TATCGGAGGAAGACGTCGCGTTTCAAGTACGAAGGAAGACGTGAAGGCAAAAACGACTCCTGTCCACGTGCTAGTGGTGGTTCGCG  
GGAGTGCAGTGGATGATGGCGCTTGGAGCGCTAAGGAATTTTCTACCGTGGACCTCAAGTTCAACTAAAAATGTGGAGGTCAGTTG  
TCAGAGTTTCTCAGAAAGATGTATGCTCAGGAACAGGAGTGGTGTGGATTTAAGTTCGACGCACTTGTATCTGCTGACGAACCTGC  
ACCTTTGGGTCGACGACACATTTACTGATCACTTGGAGTCTGACTTTCAGGAAGAAATCAAACGGTATCGGAGACGCCACCCCGGA  
TAAAAACAAGTGAAGGAAAAGGAACGCCACCAATGTAAAGGACGCCGATGTTGCAAAGCAACCACGTCGTAATCTACACGGACGG  
CAGCGATGAAATCATCAGCTGGATTAGACAAGCCTCAAGTTATGGTGGAGCAACTCCTTTTCGATAGGACGAAGCCCGAAGAAGTCC  
ACCGATTGAGTCTCGACAGTGCATTTGCTGGTGTAGTTTCGGCTGCGTTCGACTTCGCAATCTTCAAAGTTAGTTTGGCCACGAGATA  
A

>PhCRN30.2\_334 PLHAL3341207

CAATTAAGAAGGAGCAGGAGTTTACTTTCGCGGCCAACAAATTAGAGCTATATCTCGCGAAGAAAGACAAGGGCCGTGGCGCGTGGG  
TGACGGAAGAAGAAGCGAGGGGTTTGAATGGCACAAGTGAATTTGGAGATATTTGGACGTTGCGAGAGCACCCTTAAATTTGTTGGCT  
TATCGGAGGAAGACGTCGCGTTTCAAGTACGAAGGAAGACGTGAAGGCAAAAACGACTCCTGTCCACGTGCTAGTGGTGGTTCGCG  
GGAGTGCAGTGGATGATGGCGCTTGGAGCGCTAAGGAATTTTCTACCGTGGACCTCAAGTTCAACTAAAAATGTGGAGGTCAGTTG  
TCAGAGTTTCTCAGAAAGATGTATGCTCAGGAACAGGAGTGGTGTGGATTTAAGTTCGACGCACTTGTATCTGCTGACGAACCTGC  
ACCTTTGGGTCGACGACACATTTACTGATCACTTGGAGTCTGACTTTCAGGAAGAAATCAAACGGTATCGGAGACGCCACCCCGGA  
TAAAAACAAGTGAAGGAAAAGGAACGCCACCAATGTAAAGGACGCCGATGTTGCAAAGCAACCACGACGTAATCTACACGGACGG  
CAGCGATGAAATCATCAGCTGGATTAGACAAGCCTCAAGTTATGGTGGAGCAACTCCTTTTCGATAGGACGAAGCCCGAAGAAGTCC  
ACCGATTGAGTCTCGACAGTGCATTTGCTGGTGTAGTTTCGGCTGCGTTCGACTTCGCAATCTTCAAAGTTAGTTTGGCCACGAGATA  
A

>PhCRN30.2\_703 PLHAL7031162

CAATTAAGAAGGAGCAGGAGTTTACTTTCGCGGCCAACAAATTAGAGCTATATCTCGCGAAGAAAGACAAGGGCCGTGGCGCGTGGG  
TGACGGAAGAAGAAGCGAGGGGTTTGAATGGCACAAGTGAATTTGGAGATATTTGGACGTTGCGAGAGCACCCTTAAATTTGTTGGCT  
TATCGGAGGAAGACGTCGCGTTTCAAGTACGAAGGAAGACGTGAAGGCAAAAACGACTCCTGTCCACGTGCTAGTGGTGGTTCGCG  
GGAGTGCAGTGGATGATGGCGCTTGGAGCGCTAAGGAATTTTCTACCGTGGACCTCAAGTTCAACTAAAAATGTGGAGGTCAGTTG  
TCAGAGTTTCTCAGAAAGATGTATGCTCAGGAACAGGAGTGGTGTGGATTTAAGTTCGACGCACTTGTATCTGCTGACGAACCTGC  
ACCTTTGGGTCGACGACACATTTACTGATCACTTGGAGTCTGACTTTCAGGAAGAAATCAAACGGTATCGGAGACGCCACCCCGGA  
TAAAAACAAGTGAAGGAAAAGGAACGCCACCAATGTAAAGGACGCCGATGTTGCAAAGCAACCACGACGTAATCTACACGGACGG  
CAGCGATGAAATCATCAGCTGGATTAGACAAGCCTCAAGTTATGGTGGAGCAACTCCTTTTCGATAGGACGAAGCCCGAAGAAGTCC  
ACCGATTGAGTCTCGACAGTGCATTTGCTGGTGTAGTTTCGGCTGCGTTCGACTTCGCAATCTTCAAAGTTAGTTTGGCCACGAGATA  
ACAAGCTCGACCGATGCACAATATCCCTCAAGGTGACAGACACAATGAG

>PhCRN30.2\_710 PLHAL7101032

CAATTAAGAAGGAGCAGGAGTTTACTTTCGCGGCCAACAAATTAGAGCTATATCTCGCGAAGAAAGACAAGGGCCGTGGCGCGTGGG  
TGACGGAAGAAGAAGCGAGGGGTTTGAATGGCACAAGTGAATTTGGAGATATTTGGACGTTGCGAGAGCACCCTTAAATTTGTTGGCT  
TATCGGAGGAAGACGTCGCGTTTCAAGTACGAAGGAAGACGTGAAGGCAAAAACGACTCCTGTCCACGTGCTAGTGGTGGTTCGCG  
GGAGTGCAGTGGATGATGGCGCTTGGAGCGCTAAGGAATTTTCTACCGTGGACCTCAAGTTCAACTAAAAATGTGGAGGTCAGTTG  
TCAGAGTTTCTCAGAAAGATGTATGCTCAGGAACAGGAGTGGTGTGGATTTAAGTTCGACGCACTTGTATCTGCTGACGAACCTGC  
ACCTTTGGGTCGACGACACATTTACTGATCACTTGGAGTCTGACTTTCAGGAAGAAATCAAACGGTATCGGAGACGCCACCCCGGA  
TAAAAACAAGTGAAGGAAAAGGAACGCCACCAATGTAAAGGACGCCGATGTTGCAAAGCAACCACGACGTAATCTACACGGACGG  
CAGCGATGAAATCATCAGCTGGATTAGACAAGCCTCAAGTTATGGTGGAGCAACTCCTTTTCGATAGGACGAAGCCCGAAGAAGTCC  
ACCGATTGAGTCTCGACAGTGCATTTGCTGGTGTAGTTTCGGCTGCGTTCGACTTCGCAATCTTCAAAGTTAGTTTGGCCACGAGATA  
ACAAGCTCGACCGATGCACAATATCCCTCAAGGTGACAGACACAATGAGTGTGACGTTGCGGATTCGCCGCGCTCTTGAAGATC

AAGCTTTTGTATCATGCTTATGCCATCATTCCAGCTAGAATCACAGGTTGGAGCGGAAACCAAATGGTTCTCTCCTCTTTGTGTCAGCTC  
CTGGTCTATCTGGAAGCGCGATTGTGTGCACCAAAAAGTGGAGTTCAGTGGGATATCTTGGTGGTGGACTTGATGGCTCAGCAAAGA  
ACGAGCTGTATCAATCCTATGGCTACACATTTACGGAGTTATCCCCGAATTACCGTCTTCGTTGCCGCCAGATACCTAAGTTGAAA  
CAAAGGATGAGCTATAATCTGTATACAGTGCCATGTAGTGAAAGCATCTATGAGTATCCTTCAGTATCTGTGATGAGCTCATTGGTC  
GCGATTGTTTTGCATGTAATTGTGGTTGAAAGGTAGTGAATTTGCCATCTGAATCAGTCGGCAACTAATTAATGCTTTTTTCTATTAT  
ATAAAGTATAGATTGTA

>PhCRN30.2\_304 PLHAL3041131

CAATTAAGAAGGAGCAGGAGTTTACTTCGCGGCCAACAAATTAGAGCTATATCTCGCGAAGAAAGACAAGGGCCGTGGCGCGTGGG  
TGACGGAAGAAGAAGCGAGGGGTTTGAATGGCACAAGTGATTTGGAGATATTTGGACGTTGCGAGAGCACCCTTAAATTTGTTGGCT  
TATCGGAGGAAGACGTCCGGTTTCAAGTCACGAAGGAAGACGTGAAGGCCAAAACGACTCCTGTCCACGTGCTAGTGGTGGTCCCGG  
GGAGTGCAGTGGATGATGGCGCTTGGAGCGCTAAGGAATTTCTACCGTGGACCCTCAAGTTCAACTAAAAATGTGGAGGTCAGTTG  
TCAGAGTTTCCCTCAGAAGATGTATGCTCAGGAACAGGAGTGGTTGTGGATTTAACGTCGACGCACCTGTATCTGCTGACGAACCTGC  
ACCTTTGGGTCGACGACACATTTACTGATCACTTGGAGTCTGACTTCACGAAGGAAATCAAACGGTATCGGAGACGCCACCCCGGA  
TAAAAACAAGTGAAGGAAAAGGAACGCCACCAATGTAAAGGACGCCGATGTTGCAAAGCAACCACGTGCTAAATCTACACGGACGG  
CAGCGATGAAATCATCAGCTGGATTAGACAAGCCTCAAGTTATGGTGGAGCAACTCCTTTTCGATAGGACGAAGCCCGAAGAAGTCC  
ACCGATTAGTCTCGACAGTGACATTTGCTGGTGTAGTTCCGGCTGCGTTTCGACTTCGCAATCTTCAAAGTTGCTTTGCCACGAGATA  
ACAAGCTCGACCGATGCACAATATCCCTCAAGGTGACAGACACAATGAGTGTGACGTGTTCCGGATTTCCCGGCGCTCTTGAAGATC  
AAGCTTTTGTATCATGCTTATGCCATCATTCCAGCTAGAATCACAGGTTGGAGCGGAAACCAAATGGTTCTCTCCTCTTTGTGTCAGCTC  
CTGGTCTATCTGGAAGCGCGATTGTGTGCACCAAAAAGTGGAGTTCAGTGGGATATCTTGGTGGTGGACTTGATGGCTCAGCAAAGA  
ACGAGCTGTATCAATCCTATGGCTACACATTTACGGAGTTATCCCCGAATTACCGTCTTCGTTGCCGCCAGATACCTAAGTTGAAA  
CAAAGGATGAGCTATAATCTGTATACAGTGCCATGTAGTGAAAGCATCTATGAGTATCCTTCAGTATCTGTGATGAGCTCATTGGTC  
GCGATTGTTTTGCATGTAATTGTGGTTGAAAGGTAGTGAATTTGCCATCTGAATCAGTCGGCAACTAATTAATGCTTTTTTCTATTAT  
ATAAAGTATAGATTGTA

>PhCRN30.2\_700 PLHAL7001291

CAATTAAGAAGGAGCAGGAGTTTACTTCGCGGCCAACAAATTAGAGCTATATCTCGCGAAGAAAGACAAGGGCCGTGGCGCGTGGG  
TGACGGAAGAAGAAGCGAGGGGTTTGAATGGCACAAGTGATTTGGAGATATTTGGACGTTGCGAGAGCACCCTTAAATTTGTTGGCT  
TATCGGAGGAAGACGTCCGGTTTCAAGTCACGAAGGAAGACGTGAAGGCCAAAACGACTCCTGTCCACGTGCTAGTGGTGGTCCCGG  
GGAGTGCAGTGGATGATGGCGCTTGGAGCGCTAAGGAATTTCTACCGTGGACCCTCAAGTTCAACTAAAAATGTGGAGGTCAGTTG  
TCAGAGTTTCCCTCAGAAGATGTATGCTCAGGAACAGGAGTGGTTGTGGATTTAACGTCGACGCACCTGTATCTGCTGACGAACCTGC  
ACCTTTGGGTCGACGACACATTTACTGATCACTTGGAGTCTGACTTCACGAAGGAAATCAAACGGTATCGGAGACGCCACCCCGGA  
TAAAAACAAGTGAAGGAAAAGGAACGCCACCAATGTAAAGGACGCCGATGTTGCAAAGCAACCACGACGTAATCTACACGGACGG  
CAGCGATGAAATCATCAGCTGGATTAGACAAGCCTCAAGTTATGGTGGAGCAACTCCTTTTCGATAGGACGAAGCCCGAAGAAGTCC  
ACCGATTAGTCTCGACAGTGACATTTGCTGGTGTAGTTCCGGCTGCGTTTCGACTTCGCAATCTTCAAAGTTAGTTTGGCCACGAGATA  
A

>PhCRN30.2\_730 PLHAL7301188

CAATTAAGAAGGAGCAGGAGTTTACTTCGCGGCCAACAAATTAGAGCTATATCTCGCGAAGAAAGACAAGGGCCGTGGCGCGTGGG  
TGACGGAAGAAGAAGCGAGGGGTTTGAATGGCACAAGTGATTTGGAGATATTTGGACGTTGCGAGAGCACCCTTAAATTTGTTGGCT  
TATCGGAGGAAGACGTCCGGTTTCAAGTCACGAAGGAAGACGTGAAGGCCAAAACGACTCCTGTCCACGTGCTAGTGGTGGTCCCGG  
GGAGTGCAGTGGATGATGGCGCTTGGAGCGCTAAGGAATTTTCTACCGTGGACCCTCAAGTTCAACTAAAAATGTGGAGGTCAGTTG  
TCAGAGTTTCCCTCAGAAGATGTATGCTCAGGAACAGGAGTGGTTGTGGATTTAACGTCGACGCACCTGTATCTGCTGACGAACCTGC  
ACCTTTGGGTCGACGACACATTTACTGATCACTTGGAGTCTGACTTCACGAAGGAAATCAAACGGTATCGGAGACGCCACCCCGGA  
TAAAAACAAGTGAAGGAAAAGGAACGCCACCAATGTAAAGGACGCCGATGTTGCAAAGCAACCACGACGTAATCTACACGGACGG  
CAGCGATGAAATCATCAGCTGGATTAGACAAGCCTCAAGTTATGGTGGAGCAACTCCTTTTCGATAGGACGAAGCCCGAAGAAGTCC  
ACCGATTAGTCTCGACAGTGACATTTGCTGGTGTAGTTCCGGCTGCGTTTCGACTTCGCAATCTTCAAAGTTAGTTTGGCCACGAGATA  
ACAAGCTCGACCGATGCACAATATCCCTCAAGGTGAC

>PhCRN31\_100 PLHAL100A10253

GCTTTAATCAAAGCGCTGACACATGAAGACTGTGAACTTGAGGGGAGTTTGGTCTTGAGGACATTTTTGAGGGTATGCCAGAACC  
AAATCAAGCAAATTTGACGTGTTAGTGATATTTTCCACCGCATCACGACCCACTTCTTAGCCTTGACTCTTCGTGCCCAAGTTCTC  
ACAAACGCCTCAACGACTCTGTCTGAATCAAATCGATACTTCAAAAACAATTTGTGTAACACTATGGATGCTACAGCCAAAAGAAAT  
CAAGGGCGCGATGTATGTTGCTCAATGTTGCTTTTTAAAAATCGCTTGTGACTGCGTCACACCTATTTTCGTGCGCAGCAACGGATAAA  
TGTTGCTAGTAATGATGCAGATTTCTGACATCGACGATGTGAAGAATGGATTGTTATTGTTTCAGGCCTTTGAAGTACGCATTCAATC  
ATTTCCAAATTAGCTTCATTCGCGACGAAGCGGACGCTTTTCGCTTGAGAATCTTTGATCCATCTATCCGTGGCATCTCTCTCATTG  
ATCTGGCAGACCACAACGGCATCATAGTGTGTTAGCGCAGATCAGATACGATTGCTCCACATCAGCGTGTGCTGCTCGAAGAAACCAT  
GCCGCTTCGATGTCCGGACGACGTTTGGTGACGTAATGGCAGTACTCTGACATTCACTGGTTTGAAGACCGGTTCTACCGATGTT  
TAAATTTACAGGCAAGAGTGGCGCGCATGGTTGCTCTGATGAAGAACTGAAACGATGCATCAGATGACTTTCAAGATTTCTGAAAGG  
AAGTTTTCTTTGCACGACAAAATGGAGGGATTTACCCGTAGCATGTTGGCTTCTGATACAGCGTAATTAAGCATCATATTTTCCGTGT  
GTATTATGCGTGGAGTGAATTTTCCGCTTTGATCATTTTTTTCGTTCCCGACCTGTTGCCATCCAACAAATTTGATCCGAATCCCGA  
TTTTGCCGATTAATCCAACGAAACTGAGCAGCTCCACTTCGTCTTATGTGACCTTCGCACAGGTTTTTGGTTATTTGTGGGTGAAGC  
AGTATGTCTTAATGATCAGCTCCACTGGGTTGTTGCATGCGGACCCTTATCTTTCAAAACTTCGCGC

>PhCRN31\_334 PLHAL3340276

GCTTTAATCAAAGCGCTGACACATGAAGACTGTGAACTTGAGGGGAGTTTAGTCTTGAGGACATTTTTGAGGGTATGCCAGAACC  
AAATCAAGCAAATTTGACGTGTTAGTGATATTTTCCACCGCATCACGACCCACTTCTTAGCCTTGACTCTTCGTGCCCAAGTTCTC  
ACAAACGCCTCAACGACTCTGTCTGAATCAAATCGATACTTCAAAAACAATTTGTGTAACACTATGGATGCTACAGCCAAAAGAAAT  
CAAGGGCGCGATGTATGTTGCTCAATGTTGCTTTTTAAAAATCGCTTGTGACTGCGTCACACCTATTTTCGTGCGCAGCAACGGATAAA  
TGTTGCTAGTAATGATGCAGATTTCTGACATCGACGATGTGAAGAATGGATTGTTATTGTTTCAGGCCTTTGAAGTACGCATTCAATC  
ATTTCCAAATTAGCTTCATTCGCGACGAAGCGGACGCTTTTCGCTTGAGAATCTTTGATCCATCTATCCGTGGCATCTCTCTCATTG

ATCTGGCAGACCACAACGGCATCATAGTGTGTTAGCGCAGATCAGATACGATTGCTCCACATCAGCGTGTGTCGTCGTAAGAAACCAT  
GCCGCTTCGATGTCCGGACGACGTTTTGGTGACGTAAATGGCAGTACTCTGACATTCACTGGTTTTAGAACGACCGTTCTACCGATGTT  
TAAATTTACAGGCAAGAGTGGCGCGCATGGTTGTTCTGATGAAGAACTGAAACGATGCATCAGATGACTTTCAAGATTTCTGAAAGG  
AAGTTTTCTTTGCACGACAAAATGGAGGGATTTACCCGTAGCATGTTGGCTTCTGATACAGCGTAATTAAGCATCATATTTTCCGTGT  
GTATTATGCGTGCAGTGAATTTTCCGCTTTGATCATTTTTTTCGTTCCCGACCTGTTGCCATCCAACAAATGATCCGAATCCCGA  
TTTTGCCGATTAATCCAACGAAACTGAGCAGCTCCACTTCGTCTTATGTGACCTTCGCACACGTTTTTGGTTATTGTGGGTGAAGC  
AGTATGTCTTAATGATCAGCTCCACTGGGTTGTTGCATGCGGACCCCTATCTTTCAAAACTTCGCGC

>PhCRN31\_703 PLHAL7030280

GCTTTAATCAAAGCGCTGACACATGAAGACTGTGAACTTGAGGGGAGTTTTGGTCTTGAGGACATTTTTGAGGGTATGCCAGAACCGA  
AAATCAAGCAAATTTGACGTGTTAGTGATATTTTCCACCGCATCACGACCCCACTTCTTAGCCTTGACTCTTCGTGCCCAAGTTCTC  
ACAAACGCCTCAACGACTCTGTCTGAATCAAATCGATACTTCAAAACAATTTGTGTAACACTACTATGGATGCTACAGCCAAAAGAAAT  
CAAGGGCGCGATGTATGTTGCTCAATGTTGCTTTTTTAAAAATCGCTTGTGACTGCGTCACACCTATTTTCGTGCGCAGCAACGGATAAA  
TGTTGCTAGTAATGATGCAGATTTCTGACATCGACGATGTGAAGAAATGGATTGTTATTGTTTCAGGCCCTTTGAAGTACGCATTCAATC  
ATTTCCAAATTAGCTTCATTCGCGACGAAGCGGACGCTTTTTCGCTTGAGAATCTTTGATCCATCTATCCGTGGCATCTCTCTCATTG  
ATCTGGCAGACCACAACGGCATCATAGTGTGTTAGCGCAGATCAGATACGATTGCTCCACATCAGCGTGTGTCGTCGTAAGAAACCAT  
GCCGCTTCGATGTCCGGACGACGTTTTGGTGACGTAAATGGCAGTACTCTGACATTCACTGGTTTTAGAACGACCGTTCTACCGATGTT  
TAAATTTACAGGCAAGAGTGGCGCGCATGGTTGCTCTGATGAAGAACTGAAACGATGCATCAGATGACTTTCAAGATTTCTGAAAGG  
AAGTTTTCTTTGCACGACAAAATGGAGGGATTTACCCGTAGCATGTTGGCTTCTGATACAGCGTAATTAAGCATCATATTTTCCGTGT  
GTATTATGCGTGCAGTGAATTTTCCGCTTTGATCATTTTTTTCGTTCCCGACCTGTTGCCATCCAACAAATGATCCGAATCCCGA  
TTTTGCCGATTAATCCAACGAAACTGAGCAGCTCCACTTCGTCTTATGTGACCTTCGCACAGTTTTTGGTTATTGTGGGTGAAGC  
AGTATGTCTTAATGATCAGCTCCACTGGGTTGTTGCATGCGGACCCCTATCTTTCAAAACTTCGCGC

>PhCRN31\_710 PLHAL7100031

GCTTTAATCAAAGCGCTGACACATGAAGACTGTGAACTTGAGGGGAGTTTTGGTCTTGAGGACATTTTTGAGGGTATGCCAGAACCGA  
AAATCAAGCAAATTTGACGTGTTAGTGATATTTTCCACCGCATCACGACCCCACTTCTTAGCCTTGACTCTTCGTGCCCAAGTTCTC  
ACAAACGCCTCAACGACTCTGTCTGAATCAAATCGATACTTCAAAACAATTTGTGTAACACTACTATGGATGCTACAGCCAAAAGAAAT  
CAAGGGCGCGATGTATGTTGCTCAATGTTGCTTTTTTAAAAATCGCTTGTGACTGCGTCACACCTATTTTCGTGCGCAGCAACGGATAAA  
TGTTGCTAGTAATGATGCAGATTTCTGACATCGACGATGTGAAGAAATGGATTGTTATTGTTTCAGGCCCTTTGAAGTACGCATTCAATC  
ATTTCCAAATTAGCTTCATTCGCGACGAAGCGGACGCTTTTTCGCTTGAGAATCTTTGATCCATCTATCCGTGGCATCTCTCTCATTG  
ATCTGGCAGACCACAACGGCATCATAGTGTGTTAGCGCAGATCAGATACGATTGCTCCACATCAGCGTGTGTCGTCGTAAGAAACCAT  
GCCGCTTCGATGTCCGGACGACGTTTTGGTGACGTAAATGGCAGTACTCTGACATTCACTGGTTTTAGAACGACCGTTCTACCGATGTT  
TAAATTTACAGGCAAGAGTGGCGCGCATGGTTGCTCTGATGAAGAACTGAAACGATGCATCAGATGACTTTCAAGATTTCTGAAAGG  
AAGTTTTCTTTGCACGACAAAATGGAGGGATTTACCCGTAGCATGTTGGCTTCTGATACAGCGTAATTAAGCATCATATTTTCCGTGT  
GTATTATGCGTGCAGTGAATTTTCCGCTTTGATCATTTTTTTCGTTCCCGACCTGTTGCCATCCAACAAATGATCCGAATCCCGA  
TTTTGCCGATTAATCCAACGAAACTGAGCAGCTCCACTTCGTCTTATGTGACCTTCGCACAGTTTTTGGTTATTGTGGGTGAAGC  
AGTATGTCTTAATGATCAGCTCCACTGGGTTGTTGCATGCGGACCCCTATCTTTCAAAACTTCGCGC

>PhCRN31\_304 PLHAL3040005

GCTTTAATCAAAGCGCTGACACATGAAGACTGTGAACTTGAGGGGAGTTTTGGTCTTGAGGACATTTTTGAGGGTATGCCAGAACCGA  
AAATCAAGCAAATTTGACGTGTTAGTGATATTTTCCACCGCATCACGACCCCACTTCTTAGCCTTGACTCTTCGTGCCCAAGTTCTC  
ACAAACGCCTCAACGACTCTGTCTGAATCAAATCGATACTTCAAAACAATTTGTGTAACACTACTATGGATGCTACAGCCAAAAGAAAT  
CAAGGGCGCGATGTATGTTGCTCAATGTTGCTTTTTTAAAAATCGCTTGTGACTGCGTCACACCTATTTTCGTGCGCAGCAACGGATAAA  
TGTTGCTAGTAATGATGCAGATTTCTGACATCGACGATGTGAAGAAATGGATTGTTATTGTTTCAGGCCCTTTGAAGTACGCATTCAATC  
ATTTCCAAATTAGCTTCATTCGCGACGAAGCGGACGCTTTTTCGCTTGAGAATCTTTGATCCATCTATCCGTGGCATCTCTCTCATTG  
ATCTGGCAGACCACAACGGCATCATAGTGTGTTAGCGCAGATCAGATACGATTGCTCCACATCAGCGTGTGTCGTCGTAAGAAACCAT  
GCCGCTTCGATGTCCGGACGACGTTTTGGTGACGTAAATGGCAGTACTCTGACATTCACTGGTTTTAGAACGACCGTTCTACCGATGTT  
TAAATTTACAGGCAAGAGTGGCGCGCATGGTTGCTCTGATGAAGAACTGAAACGATGCATCAGATGACTTTCAAGATTTCTGAAAGG  
AAGTTTTCTTTGCACGACAAAATGGAGGGATTTACCCGTAGCATGTTGGCTTCTGATACAGCGTAATTAAGCATCATATTTTCCGTGT  
GTATTATGCGTGCAGTGAATTTTCCGCTTTGATCATTTTTTTCGTTCCCGACCTGTTGCCATCCAACAAATGATCCGAATCCCGA  
TTTTGCCGATTAATCCAACGAAACTGAGCAGCTCCACTTCGTCTTATGTGACCTTCGCACAGTTTTTGGTTATTGTGGGTGAAGC  
AGTATGTCTTAATGATCAGCTCCACTGGGTTGTTGCATGCGGACCCCTATCTTTCAAAACTTCGCGC

>PhCRN31\_700 PLHAL7000114

GCTTTAATCAAAGCGCTGACACATGAAGACTGTGAACTTGAGGGGAGTTTTGGTCTTGAGGACATTTTTGAGGGTATGCCAGAACCGA  
AAATCAAGCAAATTTGACGTGTTAGTGATATTTTCCACCGCATCACGACCCCACTTCTTAGCCTTGACTCTTCGTGCCCAAGTTCTC  
ACAAACGCCTCAACGACTCTGTCTGAATCAAATCGATACTTCAAAACAATTTGTGTAACACTACTATGGATGCTACAGCCAAAAGAAAT  
CAAGGGCGCGATGTATGTTGCTCAATGTTGCTTTTTTAAAAATCGCTTGTGACTGCGTCACACCTATTTTCGTGCGCAGCAACGGATAAA  
TGTTGCTAGTAATGATGCAGATTTCTGACATCGACGATGTGAAGAAATGGATTGTTATTGTTTCAGGCCCTTTGAAGTACGCATTCAATC  
ATTTCCAAATTAGCTTCATTCGCGACGAAGCGGACGCTTTTTCGCTTGAGAATCTTTGATCCATCTATCCGTGGCATCTCTCTCATTG  
ATCTGGCAGACCACAACGGCATCATAGTGTGTTAGCGCAGATCAGATACGATTGCTCCACATCAGCGTGTGTCGTCGTAAGAAACCAT  
GCCGCTTCGATGTCCGGACGACGTTTTGGTGACGTAAATGGCAGTACTCTGACATTCACTGGTTTTAGAACGACCGTTCTACCGATGTT  
TAAATTTACAGGCAAGAGTGGCGCGCATGGTTGTTCTGATGAAGAACTGAAACGATGCATCAGATGACTTTCAAGATTTCTGAAAGG  
AAGTTTTCTTTGCACGACAAAATGGAGGGATTTACCCGTAGCATGTTGGCTTCTGATACAGCGTAATTAAGCATCATATTTTCCGTGT  
GTATTATGCGTGCAGTGAATTTTCCGCTTTGATCATTTTTTTCGTTCCCGACCTGTTGCCATCCAACAAATGATCCGAATCCCGA  
TTTTGCCGATTAATCCAACGAAACTGAGCAGCTCCACTTCGTCTTATGTGACCTTCGCACAGTTTTTGGTTATTGTGGGTGAAGC  
AGTATGTCTTAATGATCAGCTCCACTGGGTTGTTGCATGCGGACCCCTATCTTTCAAAACTTCGCGC

>PhCRN31\_730 PLHAL7300264

GCTTTAATCAAAGCGCTGACACATGAAGACTGTGAACTTGAGGGGAGTTTTAGTCTTGAGGACATTTTTGAGGGTATGCCAGAACCGA  
AAATCAAGCAAATTTGACGTGTTAGTGATATTTTCCACCGCATCACGACCCCACTTCTTAGCCTTGACTCTTCGTGCCCAAGTTCTC  
ACAAACGCCTCAACGACTCTGTCTGAATCAAATCGATACTTCAAAACAATTTGTGTAACACTACTATGGATGCTACAGCCAAAAGAAAT

CAAGGGCGCGATGTATGTTGCTCAATGTTGCTTTTTAAAAATCGCTTGTGACTGCGTCACACCTATTTTCGTCGCAGCAACGGATAAA  
TGTTGCTAGTAATGATGCAGATTTCTGACATCGACGATGTGAAGAATGGATTGTTATTGTTTCAGGCCTTTGAAGTACGCATTCAATC  
ATTTCCAAATTAGCTTCATTCGCGACGAAGCGGACGCTTTTCGCTTGAGAATCTTTGATCCATCTATCCGTGGCATCTCTCTCATTG  
ATCTGGCAGACCACAACGGCATCATAGTGTAGCGCAGATCAGATACGATTGCTCCACATCAGCGTGTGTCGTCGAAGAAACCAT  
GCCGCTTCGATGTCCGGACGACGTTTGGTGACGTAAATGGCAGTACTCTGACATTCACTGGTTTAGAACGACCGTTCTACCGATGTT  
TAAATTTACAGGCAAGAGTGGCGCGCATGGTTGTTCTGATGAAGAACTGAAACGATGCATCAGATGACTTTCAAGATTTCTGAAAGG  
AAGTTTCTTTGCACGACAAAATGGAGGGATTTACCCGTAGCATGTTGGCTTCTGATACAGCGTAATTAAGCATCATATTTTCCGTGT  
GTATTATGCGTGCAGTGAATTTTCCGCTTTGATCATTTTTTCGTTCCCGACCTGTTGCCATCCAACAAATTGATCCGAATCCCGA  
TTTTGCCGATTAATCCAACGAAACTGAGCAGCTCCACTTCGTCTTATGTGACCTTCGCACACGTTTTTGGTTATTGTGGGTGAAGC  
AGTATGTCTTAATGATCAGCTCCACTGGGTTGTTGCATGCGGACCCTTATCTTTCAAACTTCGCGC

>PhCRN32\_100 PLHAL100A10253

GAGAACTCAAAGAGCAACTGGAGACATGTTGAAGCTGTTCTGGCGCAGTCGTTGGCGTGAAAGGTAGCGCGTTTTCCAAATGACTATC  
GACGCGACTGAGTCTGTGGATGACTTGAAGAAAGCCATCAAGAAGGAGAAGAAGAAAAGTCTGAAAATGGTCGATGCGGACAAGCTG  
CAGCTGTTCTCGCCAGACAGGGCGACAATACATGGCTCGAAAACAAGCACAGATGATGGGGAGAAGCTTAAGAAAGGGGCAACGACT  
GCTTTAATCAAAGCGCTGACACATGAAGACTGTGAACTTGAGGGGAGTTTGGTCTTGAGGACATTTTTGAGGGTATGCCAGAACCGA  
AAATCAAGCAAATTTGACGTGTTAGTGATATTTTCCACCGCATCACGACCCCACTTCTTAGCCTTGACTCTTCGTGCC

>PhCRN32\_334 PLHAL3340276

GAGAACTCAAAGAGCAACTGGAGACATGTTGAAGCTGTTCTGGCGCAGTCGTTGGCGTGAAAGGTAGCGCGTTTTCCAAATGACTATC  
GACGCGACTGAGTCTGTGGATGACTTGAAGAAAGCCATCAAGAAGGAGAAGAAGAAAAGTCTGAAAATGGTCGATGCGGACAAGCTG  
CAGCTGTTCTCGCCAGACAGGGCGACAATACATGGCTCGAAAACAAGCACAGATGATGGGGAGAAGCTTAAGAAAGGGGCAACGACT  
GCTTTAATCAAAGCGCTGACACATGAAGACTGTGAACTTGAGGGGAGTTTGGTCTTGAGGACATTTTTGAGGGTATGCCAGAACCGA  
AAATCAAGCAAATTTGACGTGTTAGTGATATTTTCCACCGCATCACGACCCCACTTCTTAGCCTTGACTCTTCGTGCC

>PhCRN32\_703 PLHAL7030280

GAGAACTCAAAGAGCAACTGGAGACATGTTGAAGCTGTTCTGGCGCAGTCGTTGGCGTGAAAGGTAGCGCGTTTTCCAAATGACTATC  
GACGCGACTGAGTCTGTGGATGACTTGAAGAAAGCCATCAAGAAGGAGAAGAAGAAAAGTCTGAAAATGGTCGATGCGGACAAGCTG  
CAGCTGTTCTCGCCAGACAGGGCGACAATACATGGCTCGAAAACAAGCACAGATGATGGGGAGAAGCTTAAGAAAGGGGCAACGACT  
GCTTTAATCAAAGCGCTGACACATGAAGACTGTGAACTTGAGGGGAGTTTGGTCTTGAGGACATTTTTGAGGGTATGCCAGAACCGA  
AAATCAAGCAAATTTGACGTGTTAGTGATATTTTCCACCGCATCACGACCCCACTTCTTAGCCTTGACTCTTCGTGCC

>PhCRN32\_710 PLHAL7100031

GAGAACTCAAAGAGCAACTGGAGACATGTTGAAGCTGTTCTGGCGCAGTCGTTGGCGTGAAAGGTAGCGCGTTTTCCAAATGACTATC  
GACGCGACTGAGTCTGTGGATGACTTGAAGAAAGCCATCAAGAAGGAGAAGAAGAAAAGTCTGAAAATGGTCGATGCGGACAAGCTG  
CAGCTGTTCTCGCCAGACAGGGCGACAATACATGGCTCGAAAACAAGCACAGATGATGGGGAGAAGCTTAAGAAAGGGGCAACGACT  
GCTTTAATCAAAGCGCTGACACATGAAGACTGTGAACTTGAGGGGAGTTTGGTCTTGAGGACATTTTTGAGGGTATGCCAGAACCGA  
AAATCAAGCAAATTTGACGTGTTAGTGATATTTTCCACCGCATCACGACCCCACTTCTTAGCCTTGACTCTTCGTGCC

>PhCRN32\_304 PLHAL3040005

GAGAACTCAAAGAGCAACTGGAGACATGTTGAAGCTGTTCTGGCGCAGTCGTTGGCGTGAAAGGTAGCGCGTTTTCCAAATGACTATC  
GACGCGACTGAGTCTGTGGATGACTTGAAGAAAGCCATCAAGAAGGAGAAGAAGAAAAGTCTGAAAATGGTCGATGCGGACAAGCTG  
CAGCTGTTCTCGCCAGACAGGGCGACAATACATGGCTCGAAAACAAGCACAGATGATGGGGAGAAGCTTAAGAAAGGGGCAACGACT  
GCTTTAATCAAAGCGCTGACACATGAAGACTGTGAACTTGAGGGGAGTTTGGTCTTGAGGACATTTTTGAGGGTATGCCAGAACCGA  
AAATCAAGCAAATTTGACGTGTTAGTGATATTTTCCACCGCATCACGACCCCACTTCTTAGCCTTGACTCTTCGTGCC

>PhCRN32\_700 PLHAL7000114

GAGAACTCAAAGAGCAACTGGAGACATGTTGAAGCTGTTCTGGCGCAGTCGTTGGCGTGAAAGGTAGCGCGTTTTCCAAATGACTATC  
GACGCGACTGAGTCTGTGGATGACTTGAAGAAAGCCATCAAGAAGGAGAAGAAGAAAAGTCTGAAAATGGTCGATGCGGACAAGCTG  
CAGCTGTTCTCGCCAGACAGGGCGACAATACATGGCTCGAAAACAAGCACAGATGATGGGGAGAAGCTTAAGAAAGGGGCAACGACT  
GCTTTAATCAAAGCGCTGACACATGAAGACTGTGAACTTGAGGGGAGTTTGGTCTTGAGGACATTTTTGAGGGTATGCCAGAACCGA  
AAATCAAGCAAATTTGACGTGTTAGTGATATTTTCCACCGCATCACGACCCCACTTCTTAGCCTTGACTCTTCGTGCC

>PhCRN32\_730 PLHAL7300264

GAGAACTCAAAGAGCAACTGGAGACATGTTGAAGCTGTTCTGGCGCAGTCGTTGGCGTGAAAGGTAGCGCGTTTTCCAAATGACTATC  
GACGCGACTGAGTCTGTGGATGACTTGAAGAAAGCCATCAAGAAGGAGAAGAAGAAAAGTCTGAAAATGGTCGATGCGGACAAGCTG  
CAGCTGTTCTCGCCAGACAGGGCGACAATACATGGCTCGAAAACAAGCACAGATGATGGGGAGAAGCTTAAGAAAGGGGCAACGACT  
GCTTTAATCAAAGCGCTGACACATGAAGACTGTGAACTTGAGGGGAGTTTGGTCTTGAGGACATTTTTGAGGGTATGCCAGAACCGA  
AAATCAAGCAAATTTGACGTGTTAGTGATATTTTCCACCGCATCACGACCCCACTTCTTAGCCTTGACTCTTCGTGCC

>PhCRN33\_100 PLHAL100A12150

GTCGCAATCTCTTCATTTAATTCATCAGCATGGTCACTCGCATTCACTAAGAATGGCTCTATTGTCCCACGTCTCATATTAAGCT  
AATAAGATGCAACAACACATCTGTAGATCAATTAATATCTATTATATTGACTAGTTGATTGACTGAGTAGGTCAAAGATGGTTGA  
CAACTTCAACATTATCAGTACGTAATATTCATCATATTGTGTCAAAATGAATACATCACTGTAGAGCTACTTCACAGTTGAAAAAAA  
TCAGCAAGTGGGAACATGGTGACGCTTTACTGCGCGATCGCTGGTTTGAAGAAAGAAATGCTTTCTCTGTTGACATCGACACTAGCCAG  
TCGGTGGGCCACTTAAAGGATGCTATTGCGCAAGAGCAGAAGTTCGATTTTGTCTGCCAGCAAATTAGAGCTATATCTCGCGAAGAAG  
GGCGAATCGTGGCTGACTGAGAATGAGGTGAAGAATGGTGTAGAGACATAAGTGGCTGAAACATCTTAGTCCCAGGGGAGCAATA  
CTTCACCGCATTTGGTTGTCTGATGAGCAAGTAGTGGGGGAAGTTGATGGAATTGAGGTAGATGCAGGAAATGGTCTGTGAATGTG  
TTGGTTGTTGTTCCCGACTTCGTGATAGTTGAAGAAGACGAAAGCTCAGAGAAATATCTGTCAGAGTTGACGTACTATCAACACTGT  
GGATGTCTTATCCAATACAAATACAGAGATTATTGTGCACACATTTTGACAAAGTCGACAAGTTCTATGACGAGAACGAGCGCCCA  
ATCCCGTTCATCTGTGTGGAAGGGTC

>PhCRN33\_334 PLHAL3342360

GTCGCAATCTCTTCATTTAATTCATCAGCATGGTCACTCGCATTCACTAAGAATGCTCTATTGTCCCCACGTCTCATATTTAAAGCTA  
ATAAGATGCAACAACACATCTGTAGATCAATTAATATCTATTATATTGACTAGTTTGATTGACTGAGTAGGTCAAAAGATGGTTGAC  
AACTTCAACATTATCAGTACGTAATATTCATCATTATGTGTCAAAAATGAATACATCACTGTAGAGCTACTTCACAGTTGAAAAAAT  
CAGCAAGTGGGAACATGGTGACGCTTTACTGCGCGATCGCTGGTTTGAAAAGAAATGCTTCTCTGTTGACATCGACACTAGCCAGT  
CGGTGGGCCACTTAAAGGATGCTATTGCGCAAGAGCAGAAGTTCGATTTTGTGCCAGCAAATTAGAGCTATATCTCGCGAAGAAG  
GCGAATCGTGGCTGACTGAGAATGAGGTGAAGAATGGTGTAGAGACATAAGTGGCCTGAAACATCTTAGTGCCGCGGGAGCAATAC  
TTCACCGCATTGGGTTGTCTGATGAGCAAGTAGTGGGGGAAGTTGATGGAATTGAGGTAGATGCAGGAAATGGTCTGTGAATGTGT  
TGTTTGTGTCCCGACCTTCGTCATAGTTGAAGAAGACGAAAAGCTCAGAGAAATATCTGTCAGAGTTGACGTACTATCAACACTGTG  
GACGTCTTATCCAATACAAATACCGAGATTATTGTGCACACATTTTGACAAAAGTCGACAAGTTCTATGACGAGAACGAGCGCCAA  
TCCCGTTTCATCTGTGTGGAAGGGTC

>PhCRN33\_703 PLHAL7030233

GTCGCAATCTCTTCATTTAATTCATCAGCATGGTCACTCGCATTCACTAAGAATGGCTCTATTGTCCCCACGTCTCATATTTAAAGCT  
AATAAGATGCAACAACACATCTGTAGATCAATTAATATCTATTATATTGACTAGTTTGATTGACTGAGTAGGTCAAAAGATGGTTGA  
CAACTTCAACATTATCAGTACGTAATATTCATCATTATGTGTCAAAAATGAATACATCACTGTAGAGCTACTTCACAGTTGAAAAA  
TCAGCAAGTGGGAACATGGTGACGCTTTACTGCGCGATCGCTGGTTTGAAAAGAAATGCTTCTCTGTTGACATCGACACTAGCCAG  
TCGGTGGGCCACTTAAAGGATGCTATTGCGCAAGAGCAGAAGTTCGATTTTGTGCCAGCAAATTAGAGCTATATCTCGCGAAGAAG  
GGCGAATCGTGGCTGACTGAGAATGAGGTGAAGAATGGTGTAGAGACATAAGTGGCCTGAAACATCTTAGTGCCGCGGGAGCAATA  
CTTACCAGCATTGGGTTGTCTGATGAGCAAGTAGTGGGGGAAGTTGATGGAATTGAGGTAGATGCAGGAAATGGTCTGTGAATGTG  
TTGGTTGTTGTCCCGACCTTCGTCATAGTTGAAGAAGACGAAAAGCTCAGAGAAATATCTGTCAGAGTTGACGTACTATCAACACTGT  
GGATGTCTTATCCAATACAAATACCGAGATTATTGTGCACACATTTTGACAAAAGTCGACAAGTTCTATGACGAGAACGAGCGCCAA  
ATCCCGTTTCATCTGTGTGGAAGGGTC

>PhCRN33\_710 PLHAL7101177

GTCGCAATCTCTTCATTTAATTCATCAGCATGGTCACTCGCATTCACTAAGAATGCTCTATTGTCCCCACGTCTCATATTTAAAGCTA  
ATAAGATGCAACAACACATCTGTAGATCAATTAATATCTATTATATTGACTAGTTTGATTGACTGAGTAGGTCAAAAGATGGTTGAC  
AACTTCAACATTATCAGTACGTAATATTCATCATTATGTGTCAAAAATGAATACATCACTGTAGAGCTACTTCACAGTTGAAAAAAT  
CAGCAAGTGGGAACATGGTGACGCTTTACTGCGCGATCGCTGGTTTGAAAAGAAATGCTTCTCTGTTGACATCGACACTAGCCAGT  
CGGTGGGCCACTTAAAGGATGCTATTGCGCAAGAGCAGAAGTTCGATTTTGTGCCAGCAAATTAGAGCTATATCTCGCGAAGAAG  
GCGAATCGTGGCTGACTGAGAATGAGGTGAAGAATGGTGTAGAGACATAAGTGGCCTGAAACATCTTAGTGCCGCGGGAGCAATA  
CTTACCAGCATTGGGTTGTCTGATGAGCAAGTAGTGGGGGAAGTTGATGGAATTGAGGTAGATGCAGGAAATGGTCTGTGAATGTG  
TTGGTTGTTGTCCCGACCTTCGTCATAGTTGAAGAAGACGAAAAGCTCAGAGAAATATCTGTCAGAGTTGACGTACTATCAACACTGT  
GGATGTCTTATCCAATACAAATACCGAGATTATTGTGCACACATTTTGACAAAAGTCGACAAGTTCTATGACGAGAACGAGCGCCAA  
ATCCCGTTTCATCTGTGTGGAAGGGTC

>PhCRN33\_304 PLHAL3041339

GTCGCAATCTCTTCATTTAATTCATCAGCATGGTCACTCGCATTCACTAAGAATGGCTCTATTGTCCCCACGTCTCATATTTAAAGCT  
AATAAGATGCAACAACACATCTGTAGATCAATTAATATCTATTATATTGACTAGTTTGATTGACTGAGTAGGTCAAAAGATGGTTGA  
CAACTTCAACATTATCAGTACGTAATATTCATCATTATGTGTCAAAAATGAATACATCACTGTAGAGCTACTTCACAGTTGAAAAA  
TCAGCAAGTGGGAACATGGTGACGCTTTACTGCGCGATCGCTGGTTTGAAAAGAAATGCTTCTCTGTTGACATCGACACTAGCCAG  
TCGGTGGGCCACTTAAAGGATGCTATTGCGCAAGAGCAGAAGTTCGATTTTGTGCCAGCAAATTAGAGCTATATCTCGCGAAGAAG  
GGCGAATCGTGGCTGACTGAGAATGAGGTGAAGAATGGTGTAGAGACATAAGTGGCCTGAAACATCTTAGTGCCGCGGGAGCAATA  
CTTACCAGCATTGGGTTGTCTGATGAGCAAGTAGTGGGGGAAGTTGATGGAATTGAGGTAGATGCAGGAAATGGTCTGTGAATGTG  
TTGGTTGTTGTCCCGACCTTCGTCATAGTTGAAGAAGACGAAAAGCTCAGAGAAATATCTGTCAGAGTTGACGTACTATCAACACTGT  
GGATGTCTTATCCAATACAAATACCGAGATTATTGTGCACACATTTTGACAAAAGTCGACAAGTTCTATGACGAGAACGAGCGCCAA  
ATCCCGTTTCATCTGTGTGGAAGGGTC

>PhCRN33\_700 PLHAL7001118

GTCGCAATCTCTTCATTTAATTCATCAGCATGGTCACTCGCATTCACTAAGAATGGCTCTATTGTCCCCACGTCTCATATTTAAAGCT  
AATAAGATGCAACAACACATCTGTAGATCAATTAATATCTATTATATTGACTAGTTTGATTGACTGAGTAGGTCAAAAGATGGTTGA  
CAACTTCAACATTATCAGTACGTAATATTCATCATTATGTGTCAAAAATGAATACATCACTGTAGAGCTACTTCACAGTTGAAAAA  
TCAGCAAGTGGGAACATGGTGACGCTTTACTGCGCGATCGCTGGTTTGAAAAGAAATGCTTCTCTGTTGACATCGACACTAGCCAG  
TCGGTGGGCCACTTAAAGGATGCTATTGCGCAAGAGCAGAAGTTCGATTTTGTGCCAGCAAATTAGAGCTATATCTCGCGAAGAAG  
GGCGAATCGTGGCTGACTGAGAATGAGGTGAAGAATGGTGTAGAGACATAAGTGGCCTGAAACATCTTAGTGCCGCGGGAGCAATA  
CTTACCAGCATTGGGTTGTCTGATGAGCAAGTAGTGGGGGAAGTTGATGGAATTGAGGTAGATGCAGGAAATGGTCTGTGAATGTG  
TTGGTTGTTGTCCCGACCTTCGTCATAGTTGAAGAAGACGAAAAGCTCAGAGAAATATCTGTCAGAGTTGACGTACTATCAACACTGT  
GGATGTCTTATCCAATACAAATACCGAGATTATTGTGCACACATTTTGACAAAAGTCGACAAGTTCTATGACGAGAACGAGCGCCAA  
ATCCCGTTTCATCTGTGTGGAAGGGTC

>PhCRN33\_730 PLHAL7301861

GTCGCAATCTCTTCATTTAATTCATCAGCATGGTCACTCGCATTCACTAAGAATGCTCTATTGTCCCCACGTCTCATATTTAAAGCTA  
ATAAGATGCAACAACACATCTGTAGATCAATTAATATCTATTATATTGACTAGTTTGATTGACTGAGTAGGTCAAAAGATGGTTGAC  
AACTTCAACATTATCAGTACGTAATATTCATCATTATGTGTCAAAAATGAATACATCACTGTAGAGCTACTTCACAGTTGAAAAAAT  
CAGCAAGTGGGAACATGGTGACGCTTTACTGCGCGATCGCTGGTTTGAAAAGAAATGCTTCTCTGTTGACATCGACACTAGCCAGT  
CGGTGGGCCACTTAAAGGATGCTATTGCGCAAGAGCAGAAGTTCGATTTTGTGCCAGCAAATTAGAGCTATATCTCGCGAAGAAG  
GCGAATCGTGGCTGACTGAGAATGAGGTGAAGAATGGTGTAGAGACATAAGTGGCCTGAAACATCTTAGTGCCGCGGGAGCAATAC  
TTCACCGCATTGGGTTGTCTGATGAGCAAGTAGTGGGGGAAGTTGATGGAATTGAGGTAGATGCAGGAAATGGTCTGTGAATGTG  
TTGGTTGTTGTCCCGACCTTCGTCATAGTTGAAGAAGACGAAAAGCTCAGAGAAATATCTGTCAGAGTTGACGTACTATCAACACTGT  
GGATGTCTTATCCAATACAAATACCGAGATTATTGTGCACACATTTTGACAAAAGTCGACAAGTTCTATGACGAGAACGAGCGCCAA  
ATCCCGTTTCATCTGTGTGGAAGGGTC

>PhCRN34\_100 PLHAL100A10975

TAAGATGCGAGACCTGGTCCACATCTAAAAAAGGTATCAGCAAGAAAAACATGGTGACGCTTTTCTGCGCAGTTGTCCGGTGAGAACG  
GAAATGCATTCCCTGTGGATATCGACACTAGCCAGTCGGTGGGTGACTTGAAAGAAGCCATTAAAGAAGAGCAGAAGTTTGATTTTG  
CTGCCAGCAAATTAGAGCTATATCTCGCGAAGAAGGGCGAATCGTGGCTGACTGAGATTGAGGTGAAGGATATAAGTGACATAAGTG  
GCCTGAAACATCTTAGTGCCGCGCAGCTAGACTTCACCACATTGGGCTGTCTGATGATCAAGTAGTAGAGGAAGTTGATGAAATTG  
AGGTAGATGCAGGAAATGGTTCTGTGAATGTGTTGGCGATTATTCCGATCGGAATGAAATATGCACTGGCTGCAAATCGAAGAGCCG  
C

>PhCRN34\_334 PLHAL3340990

TAAGATGCGAGACCTGGTCCACATCTAAAAAAGGTATCAGCAAGAAAAACATGGTGACGCTTTTCTGCGCAGTTGTCCGGTGAGAACG  
GAAATGCATTCCCTGTGGATATCGACACTAGCCAGTCGGTGGGTGACTTGAAAGAAGCCATTAAAGAAGAGCAGAAGTTTGATTTTG  
CTGCCAGCAAATTAGAGCTATATCTCGCGAAGAAGGGCGAATCGTGGCTGACTGAGATTGAGGTGAAGGATATAAGTGACATAAGTG  
ACCTGAAACATCTTAGTGCCGCGCAGCTAGACTTCACCACATTGGGCTGTCTGATGATCAAGTAGTAGAGGAAGTTGATGAAATTG  
AGGTAGATGCAGGAAATGGTTCAGTGAATGTGTTGGCGATTATTCCGATCGGAATGAAATATGCACTGGCTGCAAATCGAAGAGCCG  
C

>PhCRN34\_703 PLHAL7030960

TAAGATGCGAGACCTGGTCCACATCTAAAAAAGGTATCAGCAAGAAAAACATGGTGACGCTTTTCTGCGCAGTTGTCCGGTGAGAACG  
GAAATGCATTCCCTGTGGATATCGACACTAGCCAGTCGGTGGGTGACTTGAAAGAAGCCATTAAAGAAGAGCAGAAGTTTGATTTTG  
CTGCCAGCAAATTAGAGCTATATCTCGCGAAGAAGGGCGAATCGTGGCTGACTGAGATTGAGGTGAAGGATATAAGTGACATAAGTG  
ACCTGAAACATCTTAGTGCCGCGCAGCTAGACTTCACCACATTGGGCTGTCTGATGATCAAGTAGTAGAGGAAGTTGATGAAATTG  
AGGTAGATGCAGGAAATGGTTCAGTGAATGTGTTGGCGATTATTCCGATCGGAATGAAATATGCACTGGCTGCAAATCGAAGAGCCG  
C

>PhCRN34\_710 PLHAL7100892

TAAGATGCGAGACCTGGTCCACATCTAAAAAAGGTATCAGCAAGAAAAACATGGTGACGCTTTTCTGCGCAGTTGTCCGGTGAGAACG  
GAAATGCATTCCCTGTGGATATCGACACTAGCCAGTCGGTGGGTGACTTGAAAGAAGCCATTAAAGAAGAGCAGAAGTTTGATTTTG  
CTGCCAGCAAATTAGAGCTATATCTCGCGAAGAAGGGCGAATCGTGGCTGACTGAGATTGAGGTGAAGGATATAAGTGACATAAGTG  
GCCTGAAACATCTTAGTGCCGCGCAGCTAGACTTCACCACATTGGGCTGTCTGATGATCAAGTAGTAGAGGAAGTTGATGAAATTG  
AGGTAGATGCAGGAAATGGTTCTGTGAATGTGTTGGCGATTATTCCGATCGGAATGAAATATGCACTGGCTGCAAATCGAAGAGCCG  
C

>PhCRN34\_304 PLHAL3040955

TAAGATGCGAGACCTGGTCCACATCTAAAAAAGGTATCAGCAAGAAAAACATGGTGACGCTTTTCTGCGCAGTTGTCCGGTGAGAACG  
GAAATGCATTCCCTGTGGATATCGACACTAGCCAGTCGGTGGGTGACTTGAAAGAAGCCATTAAAGAAGAGCAGAAGTTTGATTTTG  
CTGCCAGCAAATTAGAGCTATATCTCGCGAAGAAGGGCGAATCGTGGCTGACTGAGATTGAGGTGAAGGATATAAGTGACATAAGTG  
GCCTGAAACATCTTAGTGCCGCGCAGCTAGACTTCACCACATTGGGCTGTCTGATGATCAAGTAGTAGAGGAAGTTGATGAAATTG  
AGGTAGATGCAGGAAATGGTTCTGTGAATGTGTTGGCGATTATTCCGATCGGAATGAAATATGCACTGGCTGCAAATCGAAGAGCCG  
C

>PhCRN34\_700 PLHAL7001016

TAAGATGCGAGACCTGGTCCACATCTAAAAAAGGTATCAGCAAGAAAAACATGGTGACGCTTTTCTGCGCAGTTGTCCGGTGAGAACG  
GAAATGCATTCCCTGTGGATATCGACACTAGCCAGTCGGTGGGTGACTTGAAAGAAGCCATTAAAGAAGAGCAGAAGTTTGATTTTG  
CTGCCAGCAAATTAGAGCTATATCTCGCGAAGAAGGGCGAATCGTGGCTGACTGAGATTGAGGTGAAGGATATAAGTGACATAAGTG  
ACCTGAAACATCTTAGTGCCGCGCAGCTAGACTTCACCACATTGGGCTGTCTGATGATCAAGTAGTAGAGGAAGTTGATGAAATTG  
AGGTAGATGCAGGAAATGGTTCAGTGAATGTGTTGGCGATTATTCCGATCGGAATGAAATATGCACTGGCTGCAAATCGAAGAGCCG  
C

>PhCRN34\_730 PLHAL7300987

TAAGATGCGAGACCTGGTCCACATCTAAAAAAGGTATCAGCAAGAAAAACATGGTGACGCTTTTCTGCGCAGTTGTCCGGTGAGAACG  
GAAATGCATTCCCTGTGGATATCGACACTAGCCAGTCGGTGGGTGACTTGAAAGAAGCCATTAAAGAAGAGCAGAAGTTTGATTTTG  
CTGCCAGCAAATTAGAGCTATATCTCGCGAAGAAGGGCGAATCGTGGCTGACTGAGATTGAGGTGAAGGATATAAGTGACATAAGTG  
ACCTGAAACATCTTAGTGCCGCGCAGCTAGACTTCACCACATTGGGCTGTCTGATGATCAAGTAGTAGAGGAAGTTGATGAAATTG  
AGGTAGATGCAGGAAATGGTTCAGTGAATGTGTTGGCGATTATTCCGATCGGAATGAAATATGCACTGGCTGCAAATCGAAGAGCCG  
C

>PhCRN35\_100 PLHAL100A11475

AGAAGTCGCCCGCTTGAGGTAATAATGATAAAGCTCAAGTGTGCGATCGTTGGTGCGGCGAGAAGCGTGTTCGAGGTGAAGATTGACG  
ATGCTGAGTCCGTTTTCAGCGTTGAAGGGGGTGATTAAGAAGAAGAAGATAGATACGATTAAGTGCGAAGCAGATAAGTTGGAGCTCT  
ATCTAGCGAAGATTAAGGACGGGGGATGGTTGACGGATGACGATGCTTTGGATGCGATGTTACAGAGTGAAGTTGATGTCACCTCCT  
ATTTGAAGATGCGATCGTCTGGAAGTTGAACAAACCAAATCTTTTTGGTCTAATAAATCCCGAGAAGAGGATGTGGTTACAGTGT  
TGGTGGTGGTTCCGGAGGG

>PhCRN35\_334 PLHAL3341531

AGAAGTCGCCCGCTTGAGGTAATAATGATAAAGCTCAAGTGTGCGATCGTTGGTGCGGCGAGAAGCGTGTTCGAGGTGAAGATTGACG  
ATGCTGAGTCCGTTTTCAGCGTTGAAGGGGGTGATTAAGAAGAAGAAGATAGATACGATTAAGTGCGAAGCAGATAAGTTGGAGCTCT  
ATCTAGCGAAGATTAAGGACGGGGGATGGTTGACGGATGACGATGCTTTGGATGCGATGTTACAGAGTGAAGTTGATGTCACCTCCT  
ATTTGAAGATGCGATCGTCTGGAAGTTGAACAAACCAAATCTTTTTGGTCTAATAAATCCCGAGAAGAGGATGTGGTTACAGTGT  
TGGTGGTGGTTCCGGAGGG

>PhCRN35\_703 PLHAL7031428

AGAAGTCGCCCGCTTGAGGTAATAATGATAAAGCTCAAGTGTGCGATCGTTGGTGCGGCGAGAAGCGTGTTCGAGGTGAAGATTGACG  
ATGCTGAGTCCGTTTTCAGCGTTGAAGGGGGTGATTAAGAAGAAGAAGATAGATACGATTAAGTGCGAAGCAGATAAGTTGGAGCTCT  
ATCTAGCGAAGATTAAGGACGGGGGATGGTTGACGGATGACGATGCTTTGGATGCGATGTTACAGAGTGAAGTTGATGTCACCTCCT  
ATTTGAAGATGCGATCGTCTGGAAGTTGAACAAACCAAATCTTTTTGGTCTAATAAATCCCGAGAAGAGGATGTGGTTACAGTGT  
TGGTGGTGGTTCCGGAGGG

>PhCRN35\_710 PLHAL7101283

AGAAGTCGCCGCCTTGAGGTAATAATGATAAAGCTCAAGTGTGCGATCGTTGGTGCGGCGAGAAGCGTGTTCGAGGTGAAGATTGACG  
ATGCTGAGTCCGTTTCAGCGTTGAAGGGGGTGATTAAGAAGAAGAAGATAGATACGATTAAGTGCGAAGCAGATAAGTTGGAGCTCT  
ATCTAGCGAAGATTAAGGACGGGGGATGGTTGACGGATGACGATGCTTTGGATGCGATGTTACAGAGTGGAAATTGATGTCACCTCCT  
ATTTGAAGATGCGATCGTCTGGAAGTTGAACAAACCAATCTTTTTGGTCTAATAAATCCCGAGAAGAGGATGTGGTTCACGTGT  
TGGTGGTGGTTCCGGAGGG

>PhCRN35\_304 PLHAL3041486

AGAAGTCGCCGCCTTGAGGTAATAATGATAAAGCTCAAGTGTGCGATCGTTGGTGCGGCGAGAAGCGTGTTCGAGGTGAAGATTGACG  
ATGCTGAGTCCGTTTCAGCGTTGAAGGGGGTGATTAAGAAGAAGAAGATAGATACGATTAAGTGCGAAGCAGATAAGTTGGAGCTCT  
ATCTAGCGAAGATTAAGGACGGGGGATGGTTGACGGATGACGATGCTTTGGATGCGATGTTACAGAGTGGAAATTGATGTCACCTCCT  
ATTTGAAGATGCGATCGTCTGGAAGTTGAACAAACCAATCTTTTTGGTCTAATAAATCCCGAGAAGAGGATGTGGTTCACGTGT  
TGGTGGTGGTTCCGGAGGG

>PhCRN35\_700 PLHAL7001645

AGAAGTCGCCGCCTTGAGGTAATAATGATAAAGCTCAAGTGTGCGATCGTTGGTGCGGCGAGAAGCGTGTTCGAGGTGAAGATTGACG  
ATGCTGAGTCCGTTTCAGCGTTGAAGGGGGTGATTAAGAAGAAGAAGATAGATACGATTAAGTGCGAAGCAGATAAGTTGGAGCTCT  
ATCTAGCGAAGATTAAGGACGGGGGATATTTGACGGATGACGATGCTTTGGATGCGATGTTACAGAGTGGAAATTGATGTCACCTCCT  
ATTTGAAGATGCGGTCTGCTGGAAGTTGAACAAACCAATCTTTTTGGTCTAATAAATCCCGAGAAGAGGATGTGGTTCACGTGT  
TGGTGGTGGTTCCGGAGGG

>PhCRN35\_730 PLHAL7301456

AGAAGTCGCCGCCTTGAGGTAATAATGATAAAGCTCAAGTGTGCGATCGTTGGTGCGGCGAGAAGCGTGTTCGAGGTGAAGATTGACG  
ATGCTGAGTCCGTTTCAGCGTTGAAGGGGGTGATTAAGAAGAAGAAGATAGATACGATTAAGTGCGAAGCAGATAAGTTGGAGCTCT  
ATCTAGCGAAGATTAAGGACGGGGGATATTTGACGGATGACGATGCTTTGGATGCGATGTTACAGAGTGGAAATTGATGTCACCTCCT  
ATTTGAAGATGCGATCGTCTGGAAGTTGAACAAACCAATCTTTTTGGTCTAATAAATCCCGAGAAGAGGATGTGGTTCACGTGT  
TGGTGGTGGTTCCGGAGGG

>PhCRN36\_100 PLHAL100A13632

AGAATCCGCGCGGCTCAAATACAAGATGGTAGAGGTTACCTTGATGTGTGCGGTAGTTCGGGAAGGGGGATTGGACGTCGTCCCTGTG  
GATATCGACGAGCAGAAGACAGTAGGCCACCTGAAGGATGCGATTAAGGCGAAGAAGCCTGACACGATCAAGTGTGAAGCTGACCAG  
CTGCGGCTGTTTCTGGCTAAGACAGCGGGCGGGCGCTGGCTCGAATCAAGCACAGATGATGTGAAGAAGCTCAAGAAGGGGGAAAAG  
ACTGCGCTAATCGAAGCGCTGACACACGAAGACAAAGAGCTACAGGGAGAGGATTCGCTGGAGTACGTGCTGGAAGAAAACAATATG  
CCCACCCACAGTCGAGACAGAGTCACGTGCTGGTGGTGGTTCCAGAGGCGGTTGATCGGTCAGTGAGTGAGGCATCCAAGATGGAT  
CAACTTGTCGAACAGGTCAACCAACTGAACGAC

>PhCRN36\_334 PLHAL3343716

AGAATCCGCGCGGCTCAAATACAAGATGGTAGAGGTTACCTTGATGTGTGCGGTAGTTCGGGAAGGGGGATTGGACGTCGTCCCTGTG  
GATATCGACGAGCAGAAGACAGTAGGCCACCTGAAGGATGCGATTAAGGCGAAGAAGCCTGACACGATCAAGTGTGAAGCTGACCAG  
CTGCGGCTGTTTCTGGCTAAGACAGCGGGCGGGCGCTGGCTCGAATCAAGCACAGATGATGTGAAGAAGCTCAAGAAGGGGGAAAAG  
ACTGCGCTAATCGAAGCGCTGACACACGAAGACAAAGAGCTACAGGGAGAGGATTCGCTGGAGTACGTGCTGGAAGAAAACAATATG  
CCCACCCACAGTCGAGACAGAGTCACGTGCTGGTGGTGGTTCCAGAGGCGGTTGATCGGTCAGTGAGTGAGGCATCCAAGATGGAT  
CAACTTGTCGAACAGGTCAA

>PhCRN36\_703 PLHAL7033312

AGAATCCGCGCGGCTCAAATACAAGATGGTAGAGGTTACCTTGATGTGTGCGGTAGTTCGGGAAGGGGGATTGGACGTCGTCCCTGTG  
GATATCGACGAGCAGAAGACAGTAGGCCACCTGAAGGATGCGATTAAGGCGAAGAAGCCTGACACGATCAAGTGTGAAGCTGACCAG  
CTGCGGCTGTTTCTGGCTAAGACAGCGGGCGGGCGCTGGCTCGAATCAAGCACAGATGATGTGAAGAAGCTCAAGAAGGGGGAAAAG  
ACTGCGCTAATCGAAGCGCTGACACACGAAGACAAAGAGCTACAGGGAGAGGATTCGCTGGAGTACGTGCTGGAAGAAAACAATATG  
CCCACCCACAGTCGAGACAGAGTCACGTGCTGGTGGTGGTTCCAGAGGCGGTTGATCGGTCAGTGAGTGAGGCATCCAAGATGGAT  
CAACTTGTCGAACAGGTCAACCAACTGAACGACCAACTGAAAAAA

>PhCRN36\_710 PLHAL7103651

AGAATCCGCGCGGCTCAAATACAAGATGGTAGAGGTTACCTTGATGTGTGCGGTAGTTCGGGAAGGGGGATTGGACGTCGTCCCTGTG  
GATATCGACGAGCAGAAGACAGTAGGCCACCTGAAGGATGCGATTAAGGCGAAGAAGCCTGACACGATCAAGTGTGAAGCTGACCAG  
CTGCGGCTGTTTCTGGCTAAGACAGCGGGCGGGCGCTGGCTCGAATCAAGCACAGATGATGTGAAGAAGCTCAAGAAGGGGGAAAAG  
ACTGCGCTAATCGAAGCGCTGACACACGAAGACAAAGAGCTACAGGGAGAGGATTCGCTGGAGTACGTGCTGGAAGAAAACAATATG  
CCCACCCACAGTCGAGACAGAGTCACGTGCTGGTGGTGGTTCCAGAGGCGGTTGATCGGTCAGTGAGTGAGGCATCCAAGATGGAT  
CAACTTGTCGAACAGGTCAACCAACTGAACGACCAACTGAAAAAA

>PhCRN36\_304 PLHAL3043575

AGAATCCGCGCGGCTCAAATACAAGATGGTAGAGGTTACCTTGATGTGTGCGGTAGTTCGGGAAGGGGGATTGGACGTCGTCCCTGTG  
GATATCGACGAGCAGAAGACAGTAGGCCACCTGAAGGATGCGATTAAGGCGAAGAAGCCTGACACGATCAAGTGTGAAGCTGACCAG  
CTGCGGCTGTTTCTGGCTAAGACAGCGGGCGGGCGCTGGCTCGAATCAAGCACAGATGATGTGAAGAAGCTCAAGAAGGGGGAAAAG  
ACTGCGCTAATCGAAGCGCTGACACACGAAGACAAAGAGCTACAGGGAGAGGATTCGCTGGAGTACGTGCTGGAAGAAAACAATATG  
CCCACCCACAGTCGAGACAGAGTCACGTGCTGGTGGTGGTTCCAGAGGCGGTTGATCGGTCAGTGAGTGAGGCATCCAAGATGGAT  
CAACTTGTCGAACAGGTCAACCAACTGAACGACCAAC

>PhCRN36\_700 PLHAL7004416

AGAATCCGCGCGGCTCAAATACAAGATGGTAGAGGTTACCTTGATGTGTGCGGTAGTTCGGGAAGGGGGATTGGACGTCGTCCCTGTG  
GATATCGACGAGCAGAAGACAGTAGGCCACCTGAAGGATGCGATTAAGGCGAAGAAGCCTGACACGATCAAGTGTGAAGCTGACCAG  
CTGCGGCTGTTTCTGGCTAAGACAGCGGGCGGGCGCTGGCTCGAATCAAGCACAGATGATGTGAAGAAGCTCAAGAAGGGGGAAAAG  
ACTGCGCTAATCGAAGCGCTGACACACGAAGACAAAGAGCTACAGGGAGAGGATTCGCTGGAGTACGTGCTGGAAGAAAACAATATG  
CCCACCCACAGTCGAGACAGAGTCACGTGCTGGTGGTGGTTCCAGAGGCGGTTGATCGGTCAGTGAGTGAGGCATCCAAGATGGAT  
CAACTTGTCGAACAGGTCAACCAACTGAACGAC



>PhCRN36\_730 PLHAL7303670

AGAATCCGCCGGCTCAAATACAAGATGGTAGAGGTTACCCCTGATGTGTGCGGTAGTTCGGGAAGGGGGATTGGACGTCGTCCTGTG  
GATATCGACGAGCAGAAGACAGTAGGCCACCTGAAGGATGCGATTAAGCGAAGAGCCTGACACGATCAAGTGTGAAGCTGACCAG  
CTGCGGCTGTTTCTGGCTAAGACAGCGGGCGGGCGGTGGCTCGAATCAAGCACAGATGATGTGAAGAAGCTCAAGAAGGGGGAAAAG  
ACTGCGCTAATCGAAGCGCTGACACACGAAGACAAAAGAGCTACAGGGAGAGGATTCGCTGGAGTACGTGCTGGAAGAAAACAATATG  
CCCACCCACAGTGCAGACAGAGTCACGTGCTGGTGGTGGTTCCAGAGGCGGTTGATCGGTCAGTGAGTGAGGCATCCAAGATGGAT  
CAACTTGTCGAACAGGTCAACCAACTGAACGAC

>PhRXLR01\_100 PLHAL100A10123

ATTTTCGAAAATCTTCTCTCATCGCTAACCGTTCCCAATGCGTTCGCTGGTTTGGGCTGTCATTGCTACGCTTATCGTTTTAACGCCA  
TTCTCTGAAGCAACCTCATCCATTGCATCCAACAATGAAGAATTCAGCAAAACGTACGAGTTGCATCATCCTCTTTGGAACAAAAG  
GGAACAATTGAAGACAGCGTCATTACAAGGAAGTTGCAAAGTGACAGCGTCAAAAAAGGAGACAGCACTGGTCTCGAAGAGCGGGGC  
GGGTTACATGTGCCTACAATTCATGACAACAAGATAGTACAAGGTTTTTATAAGGTGATGCGATACCTTCGACAGAACTGGGTATA  
GACTTCTTGCTCACTCGGCTTCGCTATGGGAAGAATGGTTCCCATCAACCCAATATGGGATATTCAAGAGTTGACCCTATCACTAG  
CTTTTAATCAACGCGTAATGTCATAATGTATGAACTCTTTGCTACAATCCAAGTCTACTCTTGTAACATTGTGCTGATAGCTTGCT  
CCACAAA

>PhRXLR01\_334 PLHAL3340107

ATTTTCGAAAATCTTCTCTCATCGCTAACCGTTCCCAATGCGTTCGCTGGTTTGGGCTGTCATTGCTACGCTTATCGTTTTAACGCCA  
TTCTCTGAAGCAACCTCATCCATTGCATCCAACAATGAAGAATTCAGCAAAACGTACGAGTTGCATCATCCTCTTTGGAACAAAAG  
GGAACAATTGAAGACAGCGTCATTACAAGGAAGTTGCAAAGTGACAGCGTCAAAAAAGGAGACAGCACTGGTCTCGAAGAGCGGGGC  
GGGTTACATGTGCCTACAATTCATGACAACAAGATAGTACAAGGTTTTTATAAGGTGATGCGATACCTTCGACAGAACTGGGTATA  
GACTTCTTGCTCACTCGGCTTCGCTATGGGAAGAATGGTTCCCATCAACCCAATATGGGATATTCAAGAGTTGACCCTATCACTAG  
CTTTTAATCAACGCGTAATGCCATAATGTATGAACTCTTTGCTACAATCCAAGTCTACTCTTGTAACATTGTGCTGATAGCTTGCT  
CCACAAA

>PhRXLR01\_703 PLHAL7030067

ATTTTCGAAAATCTTCTCTCATCGCTAACCGTTCCCAATGCGTTCGCTGGTTTGGGCTGTCATTGCTACGCTTATCGTTTTAACGCCA  
TTCTCTGAAGCAACCTCATCCATTGCATCCAACAATGAAGAATTCAGCAAAACGTACGAGTTGCATCATCCTCTTTGGAACAAAAG  
GGAACAATTGAAGACAGCGTCATTACAAGGAAGTTGCAAAGTGACAGCGTCAAAAAAGGAGACAGCACTGGTCTCGAAGAGCGGGGC  
GGGTTACATGTGCCTACAATTCATGACAACAAGATAGTACAAGGTTTTTATAAGGTGATGCGATACCTTCGACAGAACTGGGTATA  
GACTTCTTGCTCACTCGGCTTCGCTATGGGAAGAATGGTTCCCATCAACCCAATATGGGATATTCAAGAGTTGACCCTATCACTAG  
CTTTTAATCAACGCGTAATGCCATAATGTATGAACTCTTTGCTACAATCCAAGTCTACTCTTGTAACATTGTGCTGATAGCTTGCT  
CCACAAA

>PhRXLR01\_710 PLHAL7100126

ATTTTCGAAAATCTTCTCTCATCGCTAACCGTTCCCAATGCGTTCGCTGGTTTGGGCTGTCATTGCTACGCTTATCGTTTTAACGCCA  
TTCTCTGAAGCAACCTCATCCATTGCATCCAACAATGAAGAATTCAGCAAAACGTACGAGTTGCATCATCCTCTTTGGAACAAAAG  
GGAACAATTGAAGACAGCGTCATTACAAGGAAGTTGCAAAGTGACAGCGTCAAAAAAGGAGACAGCACTGGTCTCGAAGAGCGGGGC  
GGGTTACATGTGCCTACAATTCATGACAACAAGATAGTACAAGGTTTTTATAAGGTGATGCGATACCTTCGACAGAACTGGGTATA  
GACTTCTTGCTCACTCGGCTTCGCTATGGGAAGAATGGTTCCCATCAACCCAATATGGGATATTCAAGAGTTGACCCTATCACTAG  
CTTTTAATCAACGCGTAATGCCATAATGTATGAACTCTTTGCTACAATCCAAGTCTACTCTTGTAACATTGTGCTGATAGCTTGCT  
CCACAAA

>PhRXLR01\_304 PLHAL3040117

ATTTTCGAAAATCTTCTCTCATCGCTAACCGTTCCCAATGCGTTCGCTGGTTTGGGCTGTCATTGCTACGCTTATCGTTTTAACGCCA  
TTCTCTGAAGCAACCTCATCCATTGCATCCAACAATGAAGAATTCAGCAAAACGTACGAGTTGCATCATCCTCTTTGGAACAAAAG  
GGAACAATTGAAGACAGCGTCATTACAAGGAAGTTGCAAAGTGACAGCGTCAAAAAAGGAGACAGCACTGGTCTCGAAGAGCGGGGC  
GGGTTACATGTGCCTACAATTCATGACAACAAGATAGTACAAGGTTTTTATAAGGTGATGCGATACCTTCGACAGAACTGGGTATA  
GACTTCTTGCTCACTCGGCTTCGCTATGGGAAGAATGGTTCCCATCAACCCAATATGGGATATTCAAGAGTTGACCCTATCACTAG  
CTTTTAATCAACGCGTAATGTCATAATGTATGAACTCTTTGCTACAATCCAAGTCTACTCTTGTAACATTGTGCTGATAGCTTGCT  
CCACAAA

>PhRXLR01\_700 PLHAL7000082

ATTTTCGAAAATCTTCTCTCATCGCTAACCGTTCCCAATGCGTTCGCTGGTTTGGGCTGTCATTGCTACGCTTATCGTTTTAACGCCA  
TTCTCTGAAGCAACCTCATCCATTGCATCCAACAATGAAGAATTCAGCAAAACGTACGAGTTGCATCATCCTCTTTGGAACAAAAG  
GGAACAATTGAAGACAGCGTCATTACAAGGAAGTTGCAAAGTGACAGCGTCAAAAAAGGAGACAGCACTGGTCTCGAAGAGCGGGGC  
GGGTTACATGTGCCTACAATTCATGACAACAAGATAGTACAAGGTTTTTATAAGGTGATGCGATACCTTCGACAGAACTGGGTATA  
GACTTCTTGCTCACTCGGCTTCGCTATGGGAAGAATGGTTCCCATCAACCCAATATGGGATATTCAAGAGTTGACCCTATCACTAG  
CTTTTAATCAACGCGTAATGCCATAATGTATGAACTCTTTGCTACAATCCAAGTCTACTCTTGTAACATTGTGCTGATAGCTTGCT  
CCACAAA

>PhRXLR01\_730 PLHAL7300131

ATTTTCGAAAATCTTCTCTCATCGCTAACCGTTCCCAATGCGTTCGCTGGTTTGGGCTGTCATTGCTACGCTTATCGTTTTAACGCCA  
TTCTCTGAAGCAACCTCATCCATTGCATCCAACAATGAAGAATTCAGCAAAACGTACGAGTTGCATCATCCTCTTTGGAACAAAAG  
GGAACAATTGAAGACAGCGTCATTACAAGGAAGTTGCAAAGTGACAGCGTCAAAAAAGGAGACAGCACTGGTCTCGAAGAGCGGGGC  
GGGTTACATGTGCCTACAATTCATGACAACAAGATAGTACAAGGTTTTTATAAGGTGATGCGATACCTTCGACAGAACTGGGTATA  
GACTTCTTGCTCACTCGGCTTCGCTATGGGAAGAATGGTTCCCATCAACCCAATATGGGATATTCAAGAGTTGACCCTATCACTAG  
CTTTTAATCAACGCGTAATGCCATAATGTATGAACTCTTTGCTACAATCCAAGTCTACTCTTGTAACATTGTGCTGATAGCTTGCT  
CCACAAA

>PhRXLR02.1\_100 PLHAL100A10020

ATTCTTCAATTTGTCTCTTGTACCACAGCTCACTAGAAAACCACATCCAGCTTGTTTTCGGCATGCGTATCTCCCCCGTCGTGCTCGC  
GTTGGCAGCTTTTCGTGATTCCAAGTGGTGCAGTCTCATCGTCTATCACGAATAACGATGGTACAAGATCTCTGCGTTCAAGTAACCC  
TGAGCCAGCCGCTATAGCAGACCTGGTGCCCGCGTTGCAAGGCTCTGACAGTACAAAGAGGCTTCTCATCTCCAACGATGATTTTGA  
TTACGATGATCATGAAGAAAGGAAATCGTGGAAGAAGCGACAAAAAAGATGGCGAAGTATCACAAAAAGTATATGAAGCAATACAT  
GAAGCAATATATGAAGCCCTGGAAAAAGAGTAAACATTCGCATCGGTATTGGTATTGAGTATTTAGGCAGTAAGTTGAAGCTTAGTT  
GGTTAGCGTACTGGTCAGAACATTGTTGTTCTTAGCAGGTATTGCTTTCTCATTTATACACTCTAACACCCTCATAGCTTCTTCACT  
GATAATTATTCAATTTCTTCTTAATCCTC

>PhRXLR02.1\_334 PLHAL3340020

ATTCTTCAATTTGTCTCTTGTACCACAGCTCACTAGAAAACCACATCCAGCTTGTTTTCGGCATGCGTATCTCCCCCGTCGTGCTCGC  
GTTGGCAGCTTTTCGTGATTCCAAGTGGTGCAGTCTCATCGTCTATCACGAATAACGATGGTACAAGATCTCTGCGTTCAAGTAACCC  
TGAGCCAGCCGCTATAGCAGACCTGGTGCCCGCGTTGCAAGGCTCTGACAGTACAAAGAGGCTTCTCATCTCCAACGATGATTTTGA  
TTACGATGATCATGAAGAAAGGAAATCGTGGAAGAAGCGACATAAAAAAGATGGCGAAGTATCACAAAAAGTATATGAAGCAATACAT  
GAAGCAATATATGAAGCCCTGGAAAAAGAGTAAATATTCGCATCGGTATTGGTATTGAGTATTTAGGCAGTAAGTTGAAGCTTAGTT  
GGTTAGCGTACTGGTCAGAACATTGTTGTTCTTAGCAGGTATTGCTTTCTCATTTATACACTCTAACACCCTCATAGCTTCTTCACT  
GATAATTATTCAATTTCTTCTTAATCCTC

>PhRXLR02.1\_703 PLHAL7030020

ATTCTTCAATTTGTCTCTTGTACCACAGCTCACTAGAAAACCACATCCAGCTTGTTTTCGGCATGCGTATCTCCCCCGTCGTGCTCGC  
GTTGGCAGCTTTTCGTGATTCCAAGTGGTGCAGTCTCATCGTCTATCACGAATAACGATGGTACAAGATCTCTGCGTTCAAGTAACCC  
TGAGCCAGCCGCTATAGCAGACCTGGTGCCCGCGTTGCAAGGCTCTGACAGTACAAAGAGGCTTCTCATCTCCAACGATGATTTTGA  
TTACGATGATCATGAAGAAAGGAAATCGTGGAAGAAGCGACATAAAAAAGATGGCGAAGTATCACAAAAAGTATATGAAGCAATACAT  
GAAGCAATATATGAAGCCCTGGAAAAAGAGTAAATATTCGCATCGGTATTGGTATTGAGTATTTAGGCAGTAAGTTGAAGCTTAGTT  
GGTTAGCGTACTGGTCAGAACATTGTTGTTCTTAGCAGGTATTGCTTTCTCATTTATACACTCTAACACCCTCATAGCTTCTTCACT  
GATAATTATTCAATTTCTTCTTAATCCTC

>PhRXLR02.1\_710 PLHAL7100062

ATTCTTCAATTTGTCTCTTGTACCACAGCTCACTAGAAAACCACATCCAGCTTGTTTTCGGCATGCGTATCTCCCCCGTCGTGCTCGC  
GTTGGCAGCTTTTCGTGATTCCAAGTGGTGCAGTCTCATCGTCTATCACGAATAACGATGGTACAAGATCTCTGCGTTCAAGTAACCC  
TGAGCCAGCCGCTATAGCAGACCTGGTGCCCGCGTTGCAAGGCTCTGACAGTACAAAGAGGCTTCTCATCTCCAACGATGATTTTGA  
TTACGATGATCATGAAGAAAGGAAATCGTGGAAGAAGCGACATAAAAAAGATGGCGAAGTATCACAAAAAGTATATGAAGCAATACAT  
GAAGCAATATATGAAGCCCTGGAAAAAGAGTAAATATTCGCATCGGTATTGGTATTGAGTATTTAGGCAGTAAGTTGAAGCTTAGTT  
GGTTAGCGTACTGGTCAGAACATTGTTGTTCTTAGCAGGTATTGCTTTCTCATTTATACACTCTAACACCCTCATAGCTTCTTCACT  
GATAATTATTCAATTTCTTCTTAATCCTC

>PhRXLR02.1\_304 PLHAL3040022

ATTCTTCAATTTGTCTCTTGTACCACAGCTCACTAGAAAACCACATCCAGCTTGTTTTCGGCATGCGTATCTCCCCCGTCGTGCTCGC  
GTTGGCAGCTTTTCGTGATTCCAAGTGGTGCAGTCTCATCGTCTATCACGAATAACGATGGTACAAGATCTCTGCGTTCAAGTAACCC  
TGAGCCAGCCGCTATAGCAGACCTGGTGCCCGCGTTGCAAGGCTCTGACAGTACAAAGAGGCTTCTCATCTCCAACGATGATTTTGA  
TTACGATGATCATGAAGAAAGGAAATCGTGGAAGAAGCGACATAAAAAAGATGGCGAAGTATCACAAAAAGTATATGAAGCAATACAT  
GAAGCAATATATGAAGCCCTGGAAAAAGAGTAAATATTCGCATCGGTATTGGTATTGAGTATTTAGGCAGTAAGTTGAAGCTTAGTT  
GGTTAGCGTACTGGTCAGAACATTGTTGTTCTTAGCAGGTATTGCTTTCTCATTTATACACTCTAACACCCTCATAGCTTCTTCACT  
GATAATTATTCAATTTCTTCTTAATCCTC

>PhRXLR02.1\_700 PLHAL7000053

ATTCTTCAATTTGTCTCTTGTACCACAGCTCACTAGAAAACCACATCCAGCTTGTTTTCGGCATGCGTATCTCCCCCGTCGTGCTCGC  
GTTGGCAGCTTTTCGTGATTCCAAGTGGTGCAGTCTCATCGTCTATCACGAATAACGATGGTACAAGATCTCTGCGTTCAAGTAACCC  
TGAGCCAGCCGCTATAGCAGACCTGGTGCCCGCGTTGCAAGGCTCTGACAGTACAAAGAGGCTTCTCATCTCCAACGATGATTTTGA  
TTACGATGATCATGAAGAAAGGAAATCGTGGAAGAAGCGACATAAAAAAGATGGCGAAGTATCACAAAAAGTATATGAAGCAATACAT  
GAAGCAATATATGAAGCCCTGGAAAAAGAGTAAACATTCGCATCGGTATTGGTATTGAGTATTTAGGCAGTAAGTTGAAGCTTAGTT  
GGTTAGCGTACTGGTCAGAACATTGTTGTTCTTAGCAGGTATTGCTTTCTCATTTATACACTCTAACACCCTCATAGCTTCTTCACT  
GATAATTATTCAATTTCTTCTTAATCCTC

>PhRXLR02.1\_730 PLHAL7300003

ATTCTTCAATTTGTCTCTTGTACCACAGCTCACTAGAAAACCACATCCAGCTTGTTTTCGGCATGCGTATCTCCCCCGTCGTGCTCGC  
GTTGGCAGCTTTTCGTGATTCCAAGTGGTGCAGTCTCATCGTCTATCACGAATAACGATGGTACAAGATCTCTGCGTTCAAGTAACCC  
TGAGCCAGCCGCTATAGCAGACCTGGTGCCCGCGTTGCAAGGCTCTGACAGTACAAAGAGGCTTCTCATCTCCAACGATGATTTTGA  
TTACGATGATCATGAAGAAAGGAAATCGTGGAAGAAGCGACATAAAAAAGATGGCGAAGTATCACAAAAAGTATATGAAGCAATACAT  
GAAGCAATATATGAAGCCCTGGAAAAAGAGTAAATATTCGCATCGGTATTGGTATTGAGTATTTAGGCAGTAAGTTGAAGCTTAGTT  
GGTTAGCGTACTGGTCAGAACATTGTTGTTCTTAGCAGGTATTGCTTTCTCATTTATACACTCTAACACCCTCATAGCTTCTTCACT  
GATAATTATTCAATTTCTTCTTAATCCTC

>PhRXLR02.2\_100 PLHAL100A10020

TCGGATCAGATATATCTGGTTCGATGCGATCAGAATTAGATCCCTGTGCGAAGCTGAAACATTGGAAGCAAGCCTGGTTAAACAAGGCC  
ACTATTCAATTTGTCTCTTCCACAGCTAGCTACCTACCTACAACCAACGTGTTCCGGCATGCGTATCTCCCCAATCGTGCTCG  
CGTTGGCAGCCTTCGTGATTCCAAGTGGTGCAGTCTCATCGTCTATCACGAATAACGATGGTACAAGATCTCTGCGTACAAGTAACC  
CTGAGCCAGCTGCTATAGCAGACCTGATGCCCGCATTGCAAGGCTCCGACAGTACTAAGAGGCTTCTCATCTCCAACGATGATTTTGA  
ATTACGATGGTTCATGAAGAGAGGAAATCGAAGAAGAAGCAAAAAAAGCTAAAAAGATGGCGAAGCCTTTAAAAAGTCTGTTAAA  
GAAGTTTTGGAAGTACTAGTATAT

>PhRXLR02.2\_334 PLHAL3340020

TCGGATCAGATATATCTGGTTCGATGCGATCAGAATTAGATCCCTGTGCGAAGCTGAAACATTGGAAGCAAGCCTGGTTAAACAAGGCC  
ACTATTCAATTTGTCTCTTCCACAGCTAGCTACCTACCTACAACCAACGTGTTCCGGCATGCGTATCTCCCCAATCGTGCTCG  
CGTTGGCAGCCTTCGTGATTCCAAGTGGTGCAGTCTCATCGTCTATCACGAATAACGATGGTACAAGATCTCTGCGTACAAGTAACC

CTGAGCCAGCTGCTATAGCAGACCTGATGCCCCGATTGCAAGGCTCCGACAGTACTAAGAGGCTTCTCATCTCCAACGATGATTTTG  
ATTACGATGGTCATGAAGAGAGGAAATCGAAGAAGAAGCAAAAAAAAAAAGCTAAAAAGATGGCGAAGCGTTTTAAAAAGTCGTTAA  
AGAAGTTTTGGAAGTAGTAGATATTCGTATTGGCATTGATTGATGAGTGTTTAGGCTATAAGTTGAAGCTTGGGTGGTAAGCGTCAC  
TGGTAAAACCATTTGTTGTTCTTGGCAGGTATTGCTTCAAGACCCCTTGCAGCTTCTTCACTAATAATTAATTAATGTCCGTTTTCTTA  
ATCCT

>PhRXLR02.2\_703 PLHAL7030020

TCCGATCAGATATATCTGGTCGATGCGATCAGAATTAGATCCCTGTGCGAAGCTGAAACATTGGAAGCAAGCCTGGTTAAACAAGGCC  
ACTATTCAATTTGTCTCCTCTTCCACAGCTAGCTACCTACCTACAACCAACGTGTTCCGGCATGCGTATCTCCCCAATCGTGCTCG  
CGTTGGCAGCCTTCGTGATTCCAAGTGGTGCAGTCTCATCGTCTATCACGAATAACGATGGTACAAGATCTCTGCGTACAAGTAACC  
CTGAGCCAGCTGCTATAGCAGACCTGATGCCCCGATTGCAAGGCTCCGACAGTACTAAGAGGCTTCTCATCTCCAACGATGATTTTG  
ATTACGATGGTCATGAAGAGAGGAAATCGAAGAAGAAGCAAAAAAAAAAAGCTAAAAAGATGGCGAAGCGTTTTAAAAAGTCGTTAA  
AGAAGTTTTGGAAGTAGTAGATATTCGTATTGGCATTGATTGATGAGTGTTTAGGCTATAAGTTGAAGCTTGGGTGGTAAGCGTCAC  
TGGTAAAACCATTTGTTGTTCTTGGCAGGTATTGCTTCAAGACCCCTTGCAGCTTCTTCACTAATAATTAATTAATGTCCGTTTTCTTA  
ATCCT

>PhRXLR02.2\_710 PLHAL7100062

TCCGATCAGATATATCTGGTCGATGCGATCAGAATTAGATCCCTGTGCGAAGCTGAAACATTGGAAGCAAGCCTGGTTAAACAAGGCC  
ACTATTCAATTTGTCTCCTCTTCCACAGCTAGCTACCTACCTACAACCAACGTGTTCCGGCATGCGTATCTCCCCAATCGTGCTCG  
CGTTGGCAGCCTTCGTGATTCCAAGTGGTGCAGTCTCATCGTCTATCACGAATAACGATGGTACAAGATCTCTGCGTACAAGTAACC  
CTGAGCCAGCTGCTATAGCAGACCTGATGCCCCGATTGCAAGGCTCCGACAGTACTAAGAGGCTTCTCATCTCCAACGATGATTTTG  
ATTACGATGGTCATGAAGAGAGGAAATCGAAGAAGAAGCAAAAAAAAAAAGCTAAAAAGATGGCGAAGCGTTTTAAAAAGTCGTTAA  
AGAAGTTTTGGAAGTAGTAGATATTCGTATTGGCATTGATTGATGAGTGTTTAGGCTATAAGTTGAAGCTTGGGTGGTAAGCGTCAC  
TGGTAAAACCATTTGTTGTTCTTGGCAGGTATTGCTTCAAGACCCCTTGCAGCTTCTTCACTAATAATTAATTAATGTCCGTTTTCTTA  
ATCCT

>PhRXLR02.2\_304 PLHAL3040022

TCCGATCAGATATATCTGGTCGATGCGATCAGAATTAGATCCCTGTGCGAAGCTGAAACATTGGAAGCAAGCCTGGTTAAACAAGGCC  
ACTATTCAATTTGTCTCCTCTTCCACAGCTAGCTACCTACCTACAACCAACGTGTTCCGGCATGCGTATCTCCCCAATCGTGCTCG  
CGTTGGCAGCCTTCGTGATTCCAAGTGGTGCAGTCTCATCGTCTATCACGAATAACGATGGTACAAGATCTCTGCGTACAAGTAACC  
CTGAGCCAGCTGCTATAGCAGACCTGATGCCCCGATTGCAAGGCTCCGACAGTACTAAGAGGCTTCTCATCTCCAACGATGATTTTG  
ATTACGATGGTCATGAAGAGAGGAAATCGAAGAAGAAGCAAAAAAAAAAAGCTAAAAAGATGGCGAAGCGTTTTAAAAAGTCGTTAA  
AGAAGTTTTGGAAGTAGTAGATATTCGTATTGGCATTGATTGATGAGTGTTTAGGCTATAAGTTGAAGCTTGGGTGGTAAGCGTCAC  
TGGTAAAACCATTTGTTGTTCTTGGCAGGTATTGCTTCAAGACCCCTTGCAGCTTCTTCACTAATAATTAATTAATGTCCGTTTTCTTA  
ATCCT

>PhRXLR02.2\_700 PLHAL7000053

TCCGATCAGATATATCTGGTCGATGCGATCAGAATTAGATCCCTGTGCGAAGCTGAAACATTGGAAGCAAGCCTGGTTAAACAAGGCC  
ACTATTCAATTTGTCTCCTCTTCCACAGCTAGCTACCTACCTACAACCAACGTGTTCCGGCATGCGTATCTCCCCAATCGTGCTCG  
CGTTGGCAGCCTTCGTGATTCCAAGTGGTGCAGTCTCATCGTCTATCACGAATAACGATGGTACAAGATCTCTGCGTACAAGTAACC  
CTGAGCCAGCTGCTATAGCAGACCTGATGCCCCGATTGCAAGGCTCCGACAGTACTAAGAGGCTTCTCATCTCCAACGATGATTTTG  
ATTACGATGGTCATGAAGAGAGGAAATCGAAGAAGAAGCAAAAAAAAAAAGCTAAAAAGATGGCGAAGCGTTTTAAAAAGTCGTTAA  
AGAAGTTTTGGAAGTAGTAGATATTCGTATTGGCATTGATTGATGAGTGTTTAGGCTATAAGTTGAAGCTTGGGTGGTAAGCGTCAC  
TGGTAAAACCATTTGTTGTTCTTGGCAGGTATTGCTTCAAGACCCCTTGCAGCTTCTTCACTAATAATTAATTAATGTCCGTTTTCTTA  
ATCCT

>PhRXLR02.2\_730 PLHAL7300003

TCCGATCAGATATATCTGGTCGATGCGATCAGAATTAGATCCCTGTGCGAAGCTGAAACATTGGAAGCAAGCCTGGTTAAACAAGGCC  
ACTATTCAATTTGTCTCCTCTTCCACAGCTAGCTACCTACCTACAACCAACGTGTTCCGGCATGCGTATCTCCCCAATCGTGCTCG  
CGTTGGCAGCCTTCGTGATTCCAAGTGGTGCAGTCTCATCGTCTATCACGAATAACGATGGTACAAGATCTCTGCGTACAAGTAACC  
CTGAGCCAGCTGCTATAGCAGACCTGATGCCCCGATTGCAAGGCTCCGACAGTACTAAGAGGCTTCTCATCTCCAACGATGATTTTG  
ATTACGATGGTCATGAAGAGAGGAAATCGAAGAAGAAGCAAAAAAAAAAAGCTAAAAAGATGGCGAAGCGTTTTAAAAAGTCGTTAA  
AGAAGTTTTGGAAGTAGTAGATATTCGTATTGGCATTGATTGATGAGTGTTTAGGCTATAAGTTGAAGCTTGGGTGGTAAGCGTCAC  
TGGTAAAACCATTTGTTGTTCTTGGCAGGTATTGCTTCAAGACCCCTTGCAGCTTCTTCACTAATAATTAATTAATGTCCGTTTTCTTA  
ATCCT

>PhRXLR04\_100 PLHAL100A13730

GTCAGCAGGCAACAAGCTTTTTATCAAATTGCATGCTGACAAGGCGAAGGACCTCTTCAGCAGTCGTGAGTTTGGAAAGTGGTCGAA  
ATACTTTACGGATGCCTTCCCTGATAATCCAGAAAAGGCCGCTGGTTATATGGTGTGATATTTGGCAACAAAACACGAGGTCCAATT  
GGTCAATTCCATTCCGAAAACCGAGGTTGTCAATGACAAATTAGCTTTTGGTGTGATGAATTCGAAGCTGCGCTGATAAATTATCTCCG  
TGGTAATGAGAAGTCTGAGACGTTTAAAGATAGTCTTAAAACGTCAGTCTGCTCAGTGGTAGACTGCAGAAGGACGAGAGTTC  
AGAGCTCATTGGTGTGAAGATGCAAGAACAATCATGTCTGTTTCCAGCGGCAACGAGGAGAACTGGTTGATGCTGTTAATGTACA  
ACCAGTGCACAAGTTGTCCTCACTCCAGGAGGTGGTCAGCGAGCCAGTTACGTTGGTGACTCCCAGACTAAGCACCAAGAGGAAAA  
AGCGGCATATTTATTGAATGAAGCCGGACTTGACAAAAGTGGTGAAAAGATATCTTCAACAGCAACAGTTCAAAGTGTGGTCGGAACA  
AATG

>PhRXLR04\_334 PLHAL3343777

GTCAGCAGGCAACAAGCTTTTTATCAAATTGCATGCTGACAAGGCGAAGGACCTCTTCAGCAGTCGTGAGTTTGGAAAGTGGTCGAA  
ATACTTTACGGATGCCTTCCCTGATAATCCAGAAAAGGCCGCTGGTTATATGGTGTGATATTTGGCAACAAAACACGAGGTCCAATT  
GGTCAATTCCATTCCGAAAACCGAGGTTGTCAATGACAAATTAGCTTTTGGTGTGATGAATTCGAAGCTGCGCTGATAAATTATCTCCG  
TGGTAATGAGAAGTCTGAGACGTTTAAAGATAGTCTTAAAACGTCAGTCTGCTCAGTGGTAGACTGCAGAAGGACGAGAGTTC  
AGAGCTCATTGGTGTGAAGATGCAAGAACAATCATGTCTGTTTCCAGCGGCAACGAGGAGAACTGGTTGATGCTGTTAATGTACA  
ACCAGTGCACAAGTTGTCCTCACTCCAGGAGGTGGTCAGCGAGCCAGTTACGTTGGTGACTCCCAGACTAAGCACACAAGAGGAAAA

AGCGGCATATTTATTGAAAGAAGCCGGACTTGACAAAGTGGTGAAAGATATCTTCAACAGCAAACAGTTCAAAGTGTGGTCGGAACA  
AATG

>PhRXLR04\_703 PLHAL7034915

GTCAGCAGGCAACAAGCTTTTTATCAAATTGCATGCTGACAAGGCGAAGGACCTCTTCAGCAGTCGTGAGTTTGGAAAGTGGTCGAA  
ATACTTTACGGATGCCTTCCCTGATAATCCAGAAAAGGCCGCTGGTTATATGGTGTCGATATTGGCAACAAAACACGAGGTCCAATT  
GGTCAATTCCATTCCGAAAACCGAGGTTGTCAATGACAAATTAGCTTTTGGTGATGAATTCGAAGCTGCGCTGATAAATTATCTCCG  
TGGAATGAGAAGTCTGAGACGTTTAAAGATAGTCTTAAAACGTCAGTCTGCTCTCAGTGGTAGACTGCAGAAGGACGAGAGTTC  
AGAGCTCATTGGTGTGAAGATGCAAGAACAAATCATGTCTGTTTCCAGCGGCAACGAGGAGAAAAGTGGTTGATGCTGTTAATGTACA  
ACCAGTGCACAAGTTGTCCTCACTCCAGGAGGTGGTCAGCGAGCCAGTTACGTTGGTGACTCCCAGACTAAGCACACAAGAGGAAAA  
AGCGGCATATTTATTGAAAGAAGCCGGACTTGACAAAGTGGTGAAAGATATCTTCAACAGCAAACAGTTCAAAGTGTGGTCGGAACA  
AATG

>PhRXLR04\_710 PLHAL7103657

GTCAGCAGGCAACAAGCTTTTTATCAAATTGCATGCTGACAAGGCGAAGGACCTCTTCAGCAGTCGTGAGTTTGGAAAGTGGTCGAA  
ATACTTTACGGATGCCTTCCCTGATAATCCAGAAAAGGCCGCTGGTTATATGGTGTCGATATTGGCAACAAAACACGAGGTCCAATT  
GGTCAATTCCATTCCGAAAACCGAGGTTGTCAATGACAAATTAGCTTTTGGTGATGAATTCGAAGCTGCGCTGATAAATTATCTCCG  
TGGAATGAGAAGTCTGAGACGTTTAAAGATAGTCTTAAAACGTCAGTCTGCTCTCAGTGGTAGACTGCAGAAGGACGAGAGTTC  
AGAGCTCATTGGTGTGAAGATGCAAGAACAAATCATGTCTGTTTCCAGCGGCAACGAGGAGAAAAGTGGTTGATGCTGTTAATGTACA  
ACCAGTGCACAAGTTGTCCTCACTCCAGGAGGTGGTCAGCGAGCCAGTTACGTTGGTGACTCCCAGACTAAGCACACAAGAGGAAAA  
AGCGGCATATTTATTGAAAGAAGCCGGACTTGACAAAGTGGTGAAAGATATCTTCAACAGCAAACAGTTCAAAGTGTGGTCGGAACA  
AATG

>PhRXLR04\_304 PLHAL3043670

GTCAGCAGGCAACAAGCTTTTTATCAAATTGCATGCTGACAAGGCGAAGGACCTCTTCAGCAGTCGTGAGTTTGGAAAGTGGTCGAA  
ATACTTTACGGATGCCTTCCCTGATAATCCAGAAAAGGCCGCTGGTTATATGGTGTCGATATTGGCAACAAAACACGAGGTCCAATT  
GGTCAATTCCATTCCGAAAACCGAGGTTGTCAATGACAAATTAGCTTTTGGTGATGAATTCGAAGCTGCGCTGATAAATTATCTCCG  
TGGAATGAGAAGTCTGAGACGTTTAAAGATAGTCTTAAAACGTCAGTCTGCTCTCAGTGGTAGACTGCAGAAGGACGAGAGTTC  
AGAGCTCATTGGTGTGAAGATGCAAGAACAAATCATGTCTGTTTCCAGCGGCAACGAGGAGAAAAGTGGTTGATGCTGTTAATGTACA  
ACCAGTGCACAAGTTGTCCTCACTCCAGGAGGTGGTCAGCGAGCCAGTTACGTTGGTGACTCCCAGACTAAGCACACAAGAGGAAAA  
AGCGGCATATTTATTGAAAGAAGCCGGACTTGACAAAGTGGTGAAAGATATCTTCAACAGCAAACAGTTCAAAGTGTGGTCGGAACA  
AATG

>PhRXLR04\_700 PLHAL7004535

GTCAGCAGGCAACAAGCTTTTTATCAAATTGCATGCTGACAAGGCGAAGGACCTCTTCAGCAGTCGTGAGTTTGGAAAGTGGTCGAA  
ATACTTTACGGATGCCTTCCCTGATAATCCAGAAAAGGCCGCTGGTTATATGGTGTCGATATTGGCAACAAAACACGAGGTCCAATT  
GGTCAATTCCATTCCGAAAACCGAGGTTGTCAATGACAAATTAGCTTTTGGTGATGAATTCGAAGCTGCGCTGATAAATTATCTCCG  
TGGAATGAGAAGTCTGAGACGTTTAAAGATAGTCTTAAAACGTCAGTCTGCTCTCAGTGGTAGACTGCAGAAGGACGAGAGTTC  
AGAGCTCATTGGTGTGAAGATGCAAGAACAAATCATGTCTGTTTCCAGCGGCAACGAGGAGAAAAGTGGTTGATGCTGTTAATGTACA  
ACCAGTGCACAAGTTGTCCTCACTCCAGGAGGTGGTCAGCGAGCCAGTTACGTTGGTGACTCCCAGACTAAGCACACAAGAGGAAAA  
AGCGGCATATTTATTGAAAGAAGCCGGACTTGACAAAGTGGTGAAAGATATCTTCAACAGCAAACAGTTCAAAGTGTGGTCGGAACA  
AATG

>PhRXLR04\_730 PLHAL7303780

GTCAGCAGGCAACAAGCTTTTTATCAAATTGCATGCTGACAAGGCGAAGGACCTCTTCAGCAGTCGTGAGTTTGGAAAGTGGTCGAA  
ATACTTTACGGATGCCTTCCCTGATAATCCAGAAAAGGCCGCTGGTTATATGGTGTCGATATTGGCAACAAAACACGAGGTCCAATT  
GGTCAATTCCATTCCGAAAACCGAGGTTGTCAATGACAAATTAGCTTTTGGTGATGAATTCGAAGCTGCGCTGATAAATTATCTCCG  
TGGAATGAGAAGTCTGAGACGTTTAAAGATAGTCTTAAAACGTCAGTCTGCTCTCAGTGGTAGACTGCAGAAGGACGAGAGTTC  
AGAGCTCATTGGTGTGAAGATGCAAGAACAAATCATGTCTGTTTCCAGCGGCAACGAGGAGAAAAGTGGTTGATGCTGTTAATGTACA  
ACCAGTGCACAAGTTGTCCTCACTCCAGGAGGTGGTCAGCGAGCCAGTTACGTTGGTGACTCCCAGACTAAGCACCAAGAGGAAAA  
AGCGGCATATTTATTGAATGAAGCCGGACTTGACAAAGTGGTGAAAGATATCTTCAACAGCAAACAGTTCAAAGTGTGGTCGGAACA  
AATG

>PhRXLR05\_100 PLHAL100A10020

TCCATAACTGTAACTATTTCGAAATGCGCTTCTGCCTTGTCTTTATTAGGCTCGCAGCGTTCGTGATCTTAAGCGGTGGTGCCACAT  
CGACAACCACGGACAACGATGACACAAGATTGCTGCAGACGAGTAATATTGAGACAGCTGCTGTGGCAAATGTGCTACACGTAATGC  
AGAGCTCCGAGAGTAGTAAGAGGCTCCTTAGGCTGAACGACCAAGCGGATATCAGTGGTCATGACGAAGAAAGAAGCTCGCTGATTG  
AGAAGGGATGGAAAAAACTTCGAAAGCTCATCAAGAAGGTGTGGAAATACGTTAAGAAGCCTTTTAAAGAAGACCGCGAAGATTATCA  
AAAAGCCTTTTAAAGAGTGCACGAAGAACATTCATATAGTGTACTACAAAAGCCGTTTTTGTATCTATAACAGTATACATGACTAG

>PhRXLR05\_334 PLHAL3340020

TCCATAACTGTAACTATTTCGAAATGCGCTTCTGCCTTGTCTTTATTAGGCTCGCAGCGTTCGTGATCTTAAGCGGTGGTGCCACAT  
CGACAACCACGGACAACGATGACACAAGATTGCTGCAGACGAGTAATATTGAGACAGCTGCTGTGGCAAATGTGCTACACGTAATGC  
AGAGCTCCGAGAGTAGTAAGAGGCTCCTTAGGCTGAACGACCAAGCGGATATCAGTGGTCATGACGAAGAAAGAAGCTCGCTGATTG  
AGAAGGGATGGAAAAAACTTCGAAAGCTCATCAAGAAGGTGTGGAAATACGTTAAGAAGCCTTTTAAAGAAGACCGCGAAGATTATCA  
AAAAGCCTTTTAAAGAGTGCACGAAGAACATTCATATAGTGTACTACAAAAGCCGTTTTTGTATCTATAACAGTATACATGACTAG

>PhRXLR05\_703 PLHAL7030020

TCCATAACTGTAACTATTTCGAAATGCGCTTCTGCCTTGTCTTTATTAGGCTCGCAGCGTTCGTGATCTTAAGCGGTGGTGCCACAT  
CGACAACCACGGACAACGATGACACAAGATTGCTGCAGACGAGTAATATTGAGACAGCTGCTGTGGCAAATGTGCTACACGTAATGC  
AGAGCTCCGAGAGTAGTAAGAGGCTCCTTAGGCTGAACGACCAAGCGGATATCAGTGGTCATGACGAAGAAAGAAGCTCGCTGATTG  
AGAAGGGATGGAAAAAACTTCGAAAGCTCATCAAGAAGGTGTGGAAATACGTTAAGAAGCCTTTTAAAGAAGACCGCGAAGATTATCA  
AAAAGCCTTTTAAAGAGTGCACGAAGAACATTCATATAGTGTACTACAAAAGCCGTTTTTGTATCTATAACAGTATACATGACTAG

>PhRXLR05\_710 PLHAL7100062

TCCATAACTGTAACTATTTCGAAATGCGCTTCTGCCTTGTCTTTATTAGGCTCGCAGCGTTCGTGATCTTAAGCGGTGGTGCCACAT  
CGACAACCACGGACAACGATGACACAAGATTGCTGCAGACGAGTAATATTGAGACAGCTGCTGTGGCAAATGTGCTACACGTAATGC

AGAGCTCCGAGAGTAGTAAGAGGCTCCTTAGGCTGAACGACCAAGCGGATATCAGTGGTCATGACGAAGAAAGAAGCTCGCTGATTG  
AGAAGGGATGGAAAAAACTTCGAAAGCTCATCAAGAAGGTGTGGAAATACGTTAAGAAGCCTTTTAAAGAAGACCGCGAAGATTATCA  
AAAAGCCTTTTAAAGAGTGCACGAAGAACATTCATATAGTGTACTACAAAAGCCGTTTTTGTATCTATAACAGTATACATGACTAG  
>PhRXLR05\_304 PLHAL3040022

TCCATAACTGTTAACTATTTCGAAATGCGCTTCTGCCTTGTCTTTATTAGGCTCGCAGCGTTCGTGATCTTAAGCGGTGGTGCCACAT  
CGACAACCACGGACAACGATGACACAAGATTGCTGCAGACGAGTAATATTGAGACAGCTGCTGTGGCAAATGTGCTACACGTAATGC  
AGAGCTCCGAGAGTAGTAAGAGGCTCCTTAGGCTGAACGACCAAGCGGATATCAGTGGTCATGACGAAGAAAGAAGCTCGCTGATTG  
AGAAGGGATGGAAAAAACTTCGAAAGCTCATCAAGAAGGTGTGGAAATACGTTAAGAAGCCTTTTAAAGAAGACCGCGAAGATTATCA  
AAAAGCCTTTTAAAGAGTGCACGAAGAACATTCATATAGTGTACTACAAAAGCCGTTTTTGTATCTATAACAGTATACATGACTAG  
>PhRXLR05\_700 PLHAL7000053

TCCATAACTGTTAACTATTTCGAAATGCGCTTCTGCCTTGTCTTTATTAGGCTCGCAGCGTTCGTGATCTTAAGCGGTGGTGCCACAT  
CGACAACCACGGACAACGATGACACAAGATTGCTGCAGACGAGTAATATTGAGACAGCTGCTGTGGCAAATGTGCTACACGTAATGC  
AGAGCTCCGAGAGTAGTAAGAGGCTCCTTAGGCTGAACGACCAAGCGGATATCAGTGGTCATGACGAAGAAAGAAGCTCGCTGATTG  
AGAAGGGATGGAAAAAACTTCGAAAGCTCATCAAGAAGGTGTGGAAATACGTTAAGAAGCCTTTTAAAGAAGACCGCGAAGATTATCA  
AAAAGCCTTTTAAAGAGTGCACGAAGAACATTCATATAGTGTACTACAAAAGCCGTTTTTGTATCTATAACAGTATACATGACTAG  
>PhRXLR05\_730 PLHAL7300003

TCCATAACTGTTAACTATTTCGAAATGCGCTTCTGCCTTGTCTTTATTAGGCTCGCAGCGTTCGTGATCTTAAGCGGTGGTGCCACAT  
CGACAACCACGGACAACGATGACACAAGATTGCTGCAGACGAGTAATATTGAGACAGCTGCTGTGGCAAATGTGCTACACGTAATGC  
AGAGCTCCGAGAGTAGTAAGAGGCTCCTTAGGCTGAACGACCAAGCGGATATCAGTGGTCATGACGAAGAAAGAAGCTCGCTGATTG  
AGAAGGGATGGAAAAAACTTCGAAAGCTCATCAAGAAGGTGTGGAAATACGTTAAGAAGCCTTTTAAAGAAGACCGCGAAGATTATCA  
AAAAGCCTTTTAAAGAGTGCACGAAGAACATTCATATAGTGTACTACAAAAGCCGTTTTTGTATCTATAACAGTATACATGACTAG

>PhRXLR06\_100 PLHAL100A10005

ACTTTAAAAATCCCTCCAGCAGCGACGACACCCCGTCATCGTTAGACCTGAAGGAAGAAAGGTGTTAGTATTTTGTACGTTTAAAAATGC  
GTATTCAGCTTCTGTGGCTTTCCCTTTGCTGTGTTGAGCACCATTCTATCGACTTGTGATGCTACTTCTGACAAATGGATCCGCAGA  
GAGTGCAACCGAATCAAAATGGATCAGGACACAATCAATCCATTTCGATCCGCTTTAAAGACCAGTCATGGCAAGACAATAGCAGATG  
ATGAAGAGCGATTTATTTTCGCTGTGAGGCATGTCGGAGAAGATTGCCAAGTATTACAAAGCTATTGTTGCCAAACTCTCTAAGTATT  
TCAGAGACTATCAGAGAGGCGCGAAATAAGGAAGCAGCGAATTTTAAATAAAAAGTTTCGCCGAGATGATGGCCGGGACAAAAGTCAG  
TGGAAGACATTGGAAGAAATCAAGACGCAAGTTTTATGTCAAGTTCATTCTTGTGGACACCTGAAGCATTCAAGAGCATACTGCATA  
AGTACGCACTCTTTCTCTACAAGTATGGAAATGGACATCTTTCGACTGTACCAGTAAAAACTGGTTAAAAAGTTTCTTCGCCTGCAT  
TTAGAACATTTCAAGGTACATGACATTAACAGAGAAAACACGTTTTTCGCATTCGTT

>PhRXLR06\_334 PLHAL3340002

ACTTTAAAAATCCCTCCAGCAGCGACGACACCCCGTCATCGTTAGACCTGAAGGAAGAAAGGTGTTAGTATTTTGTACGTTTAAAAATGC  
GTATTCAGCTTCTGTGGCTTTCCCTTTGCTGTGTTGAGCACCATTCTATCGACTTGTGATGCTACTTCTGACAAATGGATCCGCAGA  
GAGTGCAACCGAATCAAAATGGATCAGGACACAATCAATCCATTTCGATCCGCTTTAAAGACCAGTCATGGCAAGACAATAGCAGATG  
ATGAAGAGCGATTTATTTTCGCTGTGAGGCATGTCGGAGAAGATTGCCAAGTATTACAAAGCTATTGTTGCCAAACTCTCTAAGTATT  
TCAGAGACTATCAGAGAGGCGCGAAATAAGGAAGCAGCGAATTTTAAATAAAAAGTTTCGCCGAGATGATGGCCGGGACAAAAGTCAG  
TGGAAGACATTGGAAGAAATCAAGACGCAAGTTTTATGTCAAGTTCATTCTTGTGGACACCTGAAGCATTCAAGAGCATACTGCATA  
AGTACGCACTCTTTCTCTACAAGTATGGAAATGGACATCTTTCGACTGTACCAGTAAAAACTGGTTAAAAAGTTTCTTCGCCTGCAT  
TTAGAACATTTCAAGGTACATGACATTAACAGAGAAAACACGTTTTTCGCATTCGTT

>PhRXLR06\_703 PLHAL7030704

ACTTTAAAAATCCCTCCAGCAGCGACGACACCCCGTCATCGTTAGACCTGAAGGAAGAAAGGTGTTAGTATTTTGTACGTTTAAAAATGC  
GTATTCAGCTTCTGTGGCTTTCCCTTTGCTGTGTTGAGCACCATTCTATCGACTTGTGATGCTACTTCTGACAAATGGATCCGCAGA  
GAGTGCAACCGAATCAAAATGGATCAGGACACAATCAATCCATTTCGATCCGCTTTAAAGACCAGTCATGGCAAGACAATAGCAGATG  
ATGAAGAGCGATTTATTTTCGCTGTGAGGCATGTCGGAGAAGATTGCCAAGTATTACAAAGCTATTGTTGCCAAACTCTCTAAGTATT  
TCAGAGACTATCAGAGAGGCGCGAAATAAGGAAGCAGCGAATTTTAAATAAAAAGTTTCGCCGAGATGATGGCCGGGACAAAAGTCAG  
TGGAAGACATTGGAAGAAATCAAGACGCAAGTTTTATGTCAAGTTCATTCTTGTGGACACCTGAAGCATTCAAGAGCATACTGCATA  
AGTACGCACTCTTTCTCTACAAGTATGGAAATGGACATCTTTCGACTGTACCAGTAAAAACTGGTTAAAAAGTTTCTTCGCCTGCAT  
TTAGAACATTTCAAGGTACATGACATTAACAGAGAAAACACGTTTTTCGCATTCGTT

>PhRXLR06\_710 PLHAL7100176

ACTTTAAAAATCCCTCCAGCAGCGACACCCCGTCATCGTTAGACCTGAAGGAAGAAAGGTGTTAGTATTTTGTACGTTTAAAAATGC  
TTCAGCTTCTGTGGCTTTCCCTTTGCTGTGTTGAGCACCATTCTATCGACTTGTGATGCTACTTCTGACAAATGGATCCGCAGAGAG  
TGCAACCGAATCAAAATGGATCAGGACACAATCAATCCATTTCGATCCGCTTTAAAGACCAGTCATGGCAAGACAATAGCAGATGATG  
AAGAGCGATTTATTTTCGCTGTGAGGCATGTCGGAGAAGATTGCCAAGTATTACAAAGCTATTGTTGCCAAACTCTCTAAGTATTTCA  
GAGACTATCAGAGAGGCGCGAAATAAGGAAGCAGCGAATTTTAAATAAAAAGTTTCGCCGAGATGATGGCCGGGACAAAAGTCAGTGG  
AAGACATTGGAAGAAATCAAGACGCAAGTTTTATGTCAAGTTCATTCTTGTGGACACCTGAAGCATTCAAGAGCATACTGCATAAGT  
ACGCACTCTTTCTCTACAAGTATGGAAATGGACATCTTTCGACTGTACCAGTAAAAACTGGTTAAAAAGTTTCTTCGCCTGCATTTA  
GAACATTTCAAGGTACATGACATTAACAGAGAAAACACGTTTTTCGCATTCGTT

>PhRXLR06\_304 PLHAL3040001

ACTTTAAAAATCCCTCCAGCAGCGACGACACCCCGTCATCGTTAGACCTGAAGGAAGAAAGGTGTTAGTATTTTGTACGTTTAAAAATGC  
GTATTCAGCTTCTGTGGCTTTCCCTTTGCTGTGTTGAGCACCATTCTATCGACTTGTGATGCTACTTCTGACAAATGGATCCGCAGA  
GAGTGCAACCGAATCAAAATGGATCAGGACACAATCAATCCATTTCGATCCGCTTTAAAGACCAGTCATGGCAAGACAATAGCAGATG  
ATGAAGAGCGATTTATTTTCGCTGTGAGGCATGTCGGAGAAGATTGCCAAGTATTACAAAGCTATTGTTGCCAAACTCTCTAAGTATT  
TCAGAGACTATCAGAGAGGCGCGAAATAAGGAAGCAGCGAATTTTAAATAAAAAGTTTCGCCGAGATGATGGCCGGGACAAAAGTCAG  
TGGAAGACATTGGAAGAAATCAAGACGCAAGTTTTATGTCAAGTTCATTCTTGTGGACACCTGAAGCATTCAAGAGCATACTGCATA  
AGTACGCACTCTTTCTCTACAAGTATGGAAATGGACATCTTTCGACTGTACCAGTAAAAACTGGTTAAAAAGTTTCTTCGCCTGCAT  
TTAGAACATTTCAAGGTACATGACATTAACAGAGAAAACACGTTTTTCGCATTCGTT

>PhrXLR06\_700 PLHAL7000116

ACTTTAAAATCCCTCCAGCAGCGACACCCCGTCATCGTTAGACCTGAAGGAAGAAAAGGTGTTAGTATTTTGTACGTTTAAAATGC  
GTATTCAGCTTCTGTGGCTTTCCCTTTGCTGTGTTGAGCACCATTCTATCGACTTGTGATGCTACTTCTGACAAAATTGGATCCGCAGA  
GAGTGCAACCGAATCAAAATGGATCAGGACACAATCAATCCATTTCGATCCGCTTTAAAGACCAGTCATGGCAAGACAATAGCAGATG  
ATGAAGAGCGATTTATTTTCGCTGTTCAGGCATGTTCGGAGAAGATTGCCAAGTATTACAAAGCTATTGTTGCCAAACTCTCTAAGTATT  
TCAGAGACTATCACGAGAGGCGCGAAAATAAGGAAGCAGCGAATTTTAAAATAAAAAGTTTCGCCGAGATGATGGCGGGACAAAAGTCAG  
TGAAGACATTGGAAGAAATCAAGACGCAAGTTTTATGTCAAGTTCATTCTTGTGGACACCTGAAGCATTCAAGAGCATACTGCATA  
AGTACGCACTCTTCTCTACAAGTATGGAATGGACATCTTTCGACTGTACCAGTAAAAACTGGTTAAAAAGTTTCTTCGCCTGCAT  
TTAGAACATTCAAGGTACATGACATTAACAGAGAAAACACGTTTTTCGCATTCGTT

>PhrXLR06\_730 PLHAL7300002:

ACTTTAAAATCCCTCCAGCAGCGACACCCCGTCATCGTTAGACCTGAAGGAAGAAAAGGTGTTAGTATTTTGTACGTTTAAAATGC  
GTATTCAGCTTCTGTGGCTTTCCCTTTGCTGTGTTGAGCACCATTCTATCGACTTGTGATGCTACTTCTGACAAAATTGGATCCGCAGA  
GAGTGCAACCGAATCAAAATGGATCAGGACACAATCAATCCATTTCGATCCGCTTTAAAGACCAGTCATGGCAAGACAATAGCAGATG  
ATGAAGAGCGATTTATTTTCGCTGTTCAGGCATGTTCGGAGAAGATTGCCAAGTATTACAAAGCTATTGTTGCCAAACTCTCTAAGTATT  
TCAGAGACTATCACGAGAGGCGCGAAAATAAGGAAGCAGCGAATTTTAAAATAAAAAGTTTCGCCGAGATGATGGCGGGACAAAAGTCAG  
TGAAGACATTGGAAGAAATCAAGACGCAAGTTTTATGTCAAGTTCATTCTTGTGGACACCTGAAGCATTCAAGAGCATACTGCATA  
AGTACGCACTCTTCTCTACAAGTATGGAATGGACATCTTTCGACTGTACCAGTAAAAACTGGTTAAAAAGTTTCTTCGCCTGCAT  
TTAGAACATTCAAGGTACATGACATTAACAGAGAAAACACGTTTTTCGCATTCGTT

>PhrXLR07\_100 PLHAL100A10475

AAACGAAAAGAGTTCATCCAGGTCAAAAATCGCCAGTTTTATTTTGCAGCTAAAAGGTTGTGACATTTAGCAAGACCGTCGATGCGTT  
TGAGCTACATCTTCGTTGTGGTAGCCACCATTATTACCAACTGTGACATTGCGTCAGCTAGCCTTAGGGCAATAATGTCTGATACGG  
CGTCAGGCAACGGCCTTGGTACCCGAATACTAAGACAAAACAAACGACAGTGACGATTTGGAACCGATCAGACACGCGATGCTTGATA  
TGGAGCTACTAGAGAAAATCGCCAAGGATCCAAAAGTATGCTGAGGAAGTATTCGGTAACTGGCGGCATAATGGTCAGACAAAGGCAG  
AGATGGAGAACCAGCTTCAGTCCAATGGTCTTCTGGGAAAATATCGATTTATCATCGATCGATACGCTGAACATTTAGCGAACTCGG  
AATAAATTGATTTCACTTTTTCTTTTATAGCTACAGAGCATTGCTGTTGTTTTCCTACGTGAATAT

>PhrXLR07\_334 PLHAL3340459

AAACGAAAAGAGTTCATCCAGGTCAAAAATCGCCAGTTTTATTTTGCAGCTAAAAGGTTGTGACATTTAGCAAGACCGTCGATGCGTT  
TGAGCTACATCTTCGTTGTGGTAGCCACCATTATTACCAACTGTGACATTGCGTCAGCTAGCCTTAGGGCAATAATGTCTGATACGG  
CGTCAGGCAACGGCCTTGGTACCCGAATACTAAGACAAAACAAACGACAGTGACGATTTGGAACCGATCAGACACGCGATGCTTGATA  
TGGAGCTACTAGAGAAAATCGCCAAGGATCCAAAAGTATGCTGAGGAAGTATTCGGTAACTGGCGGCATAATGGTCAGACAAAGGCAG  
AGATGGAGAACCAGCTTCAGTCCAATGGTCTTCTGGGAAAATATCGATTTATCATCGATCGATACGCTGAACATTTAGCGAACTCGG  
AATAAATTGATTTCACTTTTTCTTTTATAGCTACAGAGCATTGCTGTTGTTTTCCTACGTGAATAT

>PhrXLR07\_703 PLHAL7030171

AAACGAAAAGAGTTCATCCAGGTCAAAAATCGCCAGTTTTATTTTGCAGCTAAAAGGTTGTGACATTTAGCAAGACCGTCGATGCGTT  
TGAGCTACATCTTCGTTGTGGTAGCCACCATTATTACCAACTGTGACATTGCGTCAGCTAGCCTTAGGGCAATAATGTCTGATACGG  
CGTCAGGCAACGGCCTTGGTACCCGAATACTAAGACAAAACAAACGACAGTGACGATTTGGAACCGATCAGACACGCGATGCTTGATA  
TGGAGCTACTAGAGAAAATCGCCAAGGATCCAAAAGTATGCTGAGGAAGTATTCGGTAACTGGCGGCATAATGGTCAGACAAAGGCAG  
AGATGGAGAACCAGCTTCAGTCCAATGGTCTTCTGGGAAAATATCGATTTATCATCGATCGATACGCTGAACATTTAGCGAACTCGG  
AATAAATTGATTTCACTTTTTCTTTTATAGCTACAGAGCATTGCTGTTGTTTTCCTACGTGAATAT

>PhrXLR07\_710 PLHAL7100526

AAACGAAAAGAGTTCATCCAGGTCAAAAATCGCCAGTTTTATTTTGCAGCTAAAAGGTTGTGACATTTAGCAAGACCGTCGATGCGTT  
TGAGCTACATCTTCGTTGTGGTAGCCACCATTATTACCAACTGTGACATTGCGTCAGCTAGCCTTAGGGCAATAATGTCTGATACGG  
CGTCAGGCAACGGCCTTGGTACCCGAATACTAAGACAAAACAAACGACAGTGACGATTTGGAACCGATCAGACACGCGATGCTTGATA  
TGGAGCTACTAGAGAAAATCGCCAAGGATCCAAAAGTATGCTGAGGAAGTATTCGGTAACTGGCGGCATAATGGTCAGACAAAGGCAG  
AGATGGAGAACCAGCTTCAGTCCAATGGTCTTCTGGGAAAATATCGATTTATCATCGATCGATACGCTGAACATTTAGCGAACTCGG  
AATAAATTGATTTCACTTTTTCTTTTATAGCTACAGAGCATTGCTGTTGTTTTCCTACGTGAATAT

>PhrXLR07\_304 PLHAL3040494

AAACGAAAAGAGTTCATCCAGGTCAAAAATCGCCAGTTTTATTTTGCAGCTAAAAGGTTGTGACATTTAGCAAGACCGTCGATGCGTT  
TGAGCTACATCTTCGTTGTGGTAGCCACCATTATTACCAACTGTGACATTGCGTCAGCTAGCCTTAGGGCAATAATGTCTGATACGG  
CGTCAGGCAACGGCCTTGGTACCCGAATACTAAGACAAAACAAACGACAGTGACGATTTGGAACCGATCAGACACGCGATGCTTGATA  
TGGAGCTACTAGAGAAAATCGCCAAGGATCCAAAAGTATGCTGAGGAAGTATTCGGTAACTGGCGGCATAATGGTCAGACAAAGGCAG  
AGATGGAGAACCAGCTTCAGTCCAATGGTCTTCTGGGAAAATATCGATTTATCATCGATCGATACGCTGAACATTTAGCGAACTCGG  
AATAAATTGATTTCACTTTTTCTTTTATAGCTACAGAGCATTGCTGTTGTTTTCCTACGTGAATAT

>PhrXLR07\_700 PLHAL7000084

AAACGAAAAGAGTTCATCCAGGTCAAAAATCGCCAGTTTTATTTTGCAGCTAAAAGGTTGTGACATTTAGCAAGACCGTCGATGCGTT  
TGAGCTACATCTTCGTTGTGGTAGCCACCATTATTACCAACTGTGACATTGCGTCAGCTAGCCTTAGGGCAATAATGTCTGATACGG  
CGTCAGGCAACGGCCTTGGTACCCGAATACTAAGACAAAACAAACGACAGTGACGATTTGGAACCGATCAGACACGCGATGCTTGATA  
TGGAGCTACTAGAGAAAATCGCCAAGGATCCAAAAGTATGCTGAGGAAGTATTCGGTAACTGGCGGCATAATGGTCAGACAAAGGCAG  
AGATGGAGAACCAGCTTCAGTCCAATGGTCTTCTGGGAAAATATCGATTTATCATCGATCGATACGCTGAACATTTAGCGAACTCGG  
AATAAATTGATTTCACTTTTTCTTTTATAGCTACAGAGCATTGCTGTTGTTTTCCTACGTGAATAT

>PhrXLR07\_730 PLHAL7300503

AAACGAAAAGAGTTCATCCAGGTCAAAAATCGCCAGTTTTATTTTGCAGCTAAAAGGTTGTGACATTTAGCAAGACCGTCGATGCGTT  
TGAGCTACATCTTCGTTGTGGTAGCCACCATTATTACCAACTGTGACATTGCGTCAGCTAGCCTTAGGGCAATAATGTCTGATACGG  
CGTCAGGCAACGGCCTTGGTACCCGAATACTAAGACAAAACAAACGACAGTGACGATTTGGAACCGATCAGACACGCGATGCTTGATA  
TGGAGCTACTAGAGAAAATCGCCAAGGATCCAAAAGTATGCTGAGGAAGTATTCGGTAACTGGCGGCATAATGGTCAGACAAAGGCAG

AGATGGAGAACCAGCTTCAGTCCAATGGTCTTCTGGGAAAATATCGATTTATCATCGATCGATACGCTGAACATTTAGCGAACTCGG  
AATAAATTGATTTCACTTTTTCTTTTATAGCTACAGAGCATTGCTGTTGTTTCTACGTGAATAT

>PhRXLR08\_100 PLHAL100A10055

ACTTTGCAATATTTCTTGAAGCGATGCGTGTGGTTTTGCTTCTACTCCTGACTATTGCCGTCTCAGTCACCTATGTCTTGGCATCCT  
CCGACGAGAACGATAAAAGCTCTACACACATCCGATACAACGTATGGAAATGGGCAATTGCTGAGCAACGAGGCAGCTAACACTGAGA  
CCCCAACTCATGATGATGAAGAGAGAAACCGTCCGATCGGGCAGCTGATGAGCGATAACTTGTTTAAATTCAAGATGATGTCGAAAA  
CAGCTTTCTGGAATGCTAACAAAATTGCTGCATACTTAAAGAAGAAAAATATTACAGCGAAAAAGTGGCACCAGTTTTACCAGCTCC  
AGAAACAAAAAAACCAAGAAGCAAAGTTACCTGATGGAAGTTATGTCAAATCGCTCGAGCAAGCAGTTTATGAATTACTTCCCTGCCT  
CTCAGAACATACAAAAACGACTACTTCCAATCCTGTGCTCTAAGAACCTGACTTGACGTTTCTGTATCGGATCAGAGCGTCAGAAA  
CTTATATAGTTTTGGTTTGTAAATGCGTATCATCACTTATATTTCGATTTGTTGCTATAGTTTGTGATCATATGCAGTTAATATATTA  
CGAATCGAGTC

>PhRXLR08\_334 PLHAL3340010

ACTTTGCAATATTTCTTGAAGCGATGCGTGTGGTTTTGCTTCTACTCCTGACTATTGCCGTCTCAGTCACCTATGTCTTGGCATCCT  
CCGACGAGAACGATAAAAGCTCTACACACATCCGATACAACGTATGGAAATGGGCAATTGCTGAGCAACGAGGCAGCTAACACTGAGA  
CCCCAACTCATGATGATGAAGAGAGAAACCGTCCGATCGGGCAGCTGATGAGCGATTACTTGTTTAAATTCAAGATGATGTCGAAAA  
CAGCTCTCTGGAATGCTAACAAAATTGCTGCATACTTAAAGAAGAAAAATATTACAGCGAAAAAGTGGCACCAGTTTTACCAGCTCC  
AGAAACAAAAAAACCAAGAAGCAAAGTTACCTGATGGAAGTTATGTCAAATCGCTCGAGCAAGAAGTTTATGAATTACTTACTGCCT  
CTCAGAACATACAAAAACGACTACTTCCAATCCTGTGCTCTAAGAACCTGACTTGACGTTTCTGTATCGGATCAGAGCGTCAGAAA  
CTTATATAGTTTTGGTTTGTAAATGCGTATCATCACTTATATTTCGATTTGTTGCTATAGTTTGTGATCATATGCAGTTAATATATTA  
CGAATCGAGTC

>PhRXLR08\_703 PLHAL7030013

ACTTTGCAATATTTCTTGAAGCGATGCGTGTGGTTTTGCTTCTACTCCTGACTATTGCCGTCTCAGTCACCTATGTCTTGGCATCCT  
CCGACGAGAACGATAAAAGCTCTACACACATCCGATACAACGTATGGAAATGGGCAATTGCTGAGCAACGAGGCAGCTAACACTGAGA  
CCCCAACTCATGATGATGAAGAGAGAAACCGTCCGATCGGGCAGCTGATGAGCGATTACTTGTTTAAATTCAAGATGATGTCGAAAA  
CAGCTCTCTGGAATGCTAACAAAATTGCTGCATACTTAAAGAAGAAAAATATTACAGCGAAAAAGTGGCACCAGTTTTACCAGCTCC  
AGAAACAAAAAAACCAAGAAGCAAAGTTACCTGATGGAAGTTATGTCAAATCGCTCGAGCAAGAAGTTTATGAATTACTTACTGCCT  
CTCAGAACATACAAAAACGACTACTTCCAATCCTGTGCTCTAAGAACCTGACTTGACGTTTCTGTATCGGATCAGAGCGTCAGAAA  
CTTATATAGTTTTGGTTTGTAAATGCGTATCATCACTTATATTTCGATTTGTTGCTATAGTTTGTGATCATATGCAGTTAATATATTA  
CGAATCGAGTC

>PhRXLR08\_710 PLHAL7100028

ACTTTGCAATATTTCTTGAAGCGATGCGTGTGGTTTTGCTTCTACTCCTGACTATTGCCGTCTCAGTCACCTATGTCTTGGCATCCT  
CCGACGAGAACGATAAAAGCTCTACACACATCCGATACAACGTATGGAAATGGGCAATTGCTGAGCAACGAGGCAGCTAACACTGAGA  
CCCCAACTCATGATGATGAAGAGAGAAACCGTCCGATCGGGCAGCTGATGAGCGATTACTTGTTTAAATTCAAGATGATGTCGAAAA  
CAGCTCTCTGGAATGCTAACAAAATTGCTGCATACTTAAAGAAGAAAAATATTACAGCGAAAAAGTGGCACCAGTTTTACCAGCTCC  
AGAAACAAAAAAACCAAGAAGCAAAGTTACCTGATGGAAGTTATGTCAAATCGCTCGAGCAAGAAGTTTATGAATTACTTACTGCCT  
CTCAGAACATACAAAAACGACTACTTCCAATCCTGTGCTCTAAGAACCTGACTTGACGTTTCTGTATCGGATCAGAGCGTCAGAAA  
CTTATATAGTTTTGGTTTGTAAATGCGTATCATCACTTATATTTCGATTTGTTGCTATAGTTTGTGATCATATGCAGTTAATATATTA  
CGAATCGAGTC

>PhRXLR08\_304 PLHAL3040024

ACTTTGCAATATTTCTTGAAGCGATGCGTGTGGTTTTGCTTCTACTCCTGACTATTGCCGTCTCAGTCACCTATGTCTTGGCATCCT  
CCGACGAGAACGATAAAAGCTCTACACACATCCGATACAACGTATGGAAATGGGCAATTGCTGAGCAACGAGGCAGCTAACACTGAGA  
CCCCAACTCATGATGATGAAGAGAGAAACCGTCCGATCGGGCAGCTGATGAGCGATAACTTGTTTAAATTCAAGATGATGTCGAAAA  
CAGCTTTCTGGAATGCTAACAAAATTGCTGCATACTTAAAGAAGAAAAATATTACAGCGAAAAAGTGGCACCAGTTTTACCAGCTCC  
AGAAACAAAAAAACCAAGAAGCAAAGTTACCTGATGGAAGTTATGTCAAATCGCTCGAGCAAGCAGTTTATGAATTACTTCCCTGCCT  
CTCAGAACATACAAAAACGACTACTTCCAATCCTGTGCTCTAAGAACCTGACTTGACGTTTCTGTATCGGATCAGAGCGTCAGAAA  
CTTATATAGTTTTGGTTTGTAAATGCGTATCATCACTTATATTTCGATTTGTTGCTATAGTTTGTGATCATATGCAGTTAATATATTA  
CGAATCGAGTC

>PhRXLR08\_700 PLHAL7000267

ACTTTGCAATATTTCTTGAAGCGATGCGTGTGGTTTTGCTTCTACTCCTGACTATTGCCGTCTCAGTCACCTATGTCTTGGCATCCT  
CCGACGAGAACGATAAAAGCTCTACACACATCCGATACAACGTATGGAAATGGGCAATTGCTGAGCAACGAGGCAGCTAACACTGAGA  
CCCCAACTCATGATGATGAAGAGAGAAACCGTCCGATCGGGCAGCTGATGAGCGATTACTTGTTTAAATTCAAGATGATGTCGAAAA  
CAGCTCTCTGGAATGCTAACAAAATTGCTGCATACTTAAAGAAGAAAAATATTACAGCGAAAAAGTGGCACCAGTTTTACCAGCTCC  
AGAAACAAAAAAACCAAGAAGCAAAGTTACCTGATGGAAGTTATGTCAAATCGCTCGAGCAAGAAGTTTATGAATTACTTACTGCCT  
CTCAGAACATACAAAAACGACTACTTCCAATCCTGTGCTCTAAGAACCTGACTTGACGTTTCTGTATCGGATCAGAGCGTCAGAAA  
CTTATATAGTTTTGGTTTGTAAATGCGTATCATCACTTATATTTCGATTTGTTGCTATAGTTTGTGATCATATGCAGTTAATATATTA  
CGAATCGAGTC

>PhRXLR08\_730 PLHAL7300018

ACTTTGCAATATTTCTTGAAGCGATGCGTGTGGTTTTGCTTCTACTCCTGACTATTGCCGTCTCAGTCACCTATGTCTTGGCATCCT  
CCGACGAGAACGATAAAAGCTCTACACACATCCGATACAACGTATGGAAATGGGCAATTGCTGAGCAACGAGGCAGCTAACACTGAGA  
CCCCAACTCATGATGATGAAGAGAGAAACCGTCCGATCGGGCAGCTGATGAGCGATTACTTGTTTAAATTCAAGATGATGTCGAAAA  
CAGCTCTCTGGAATGCTAACAAAATTGCTGCATACTTAAAGAAGAAAAATATTACAGCGAAAAAGTGGCACCAGTTTTACCAGCTCC  
AGAAACAAAAAAACCAAGAAGCAAAGTTACCTGATGGAAGTTATGTCAAATCGCTCGAGCAAGAAGTTTATGAATTACTTACTGCCT  
CTCAGAACATACAAAAACGACTACTTCCAATCCTGTGCTCTAAGAACCTGACTTGACGTTTCTGTATCGGATCAGAGCGTCAGAAA  
CTTATATAGTTTTGGTTTGTAAATGCGTATCATCACTTATATTTCGATTTGTTGCTATAGTTTGTGATCATATGCAGTTAATATATTA  
CGAATCGAGTC





GACAACGAGTTTGTATCGTTGTTGTGATCGTACCGACAAGACTGTAGTCAGTTTGCATGTCTTGTGGCATCTATACCCGACGCTTTT  
TTTACGGCAACGAAGTCGGCAGTTTTAGCAATTATTTGGTCAGGAACCTTATTGCCAGAACTAACTTTTTCTTTTGTTCATAGCAG  
AGCCTAAGCTACACACCGAGAAGAAGAGTCT

>PhRXLR15\_100 PLHAL100A10710

CTAAGTTCGGTCTCATGGGTGGCGCTTTCTCCAAGGTCGCTGTGCTCATCATTTTCAGCCCCCACCCTCACAGCTGTTAAATCCTACG  
TCCCCAATTCTCAGACGGAGCAAAATCATGACATCGTGCCGATTGGTGGTACAGACACCGATATGTTGCCAAGAGATCTCTCCAAG  
GGAGTTATGACCAAGTAGCGATCCCTGTGGTTGAAGAAGAGCGTGCATCTTTAGCTAATTTGATTGAAAATGCAGGAGAAGATGCCA  
TTAGAATACTGGTTTCTTTCACATATGGAGAGGACTGAAAATAACGTTCTGGAGTGTTTAGAAAAGAAGATTATGAATGGAGAATACC  
TCGGTTCTCCCGCCGACCGAGATGCCATCATCAAGTTATCCTCTTACCACGCCAAAAAAGTTGAAGAGGGCAACGATATATCAACCG  
CAACCACGAATATAATGAATCGCTATGACCCGATCTCTTTTATCCGTCGAGATGTCAAAGCTCTACATGATGGCTCCTCCGTCGCCG  
CCAGTAAAGACATCCAATTTCTTGAGGAGGCCTTCGACATTTACATGTTTTGCGTCGGCGAAAATTGAGAACTACGCTCAAGAATTAA  
AAGACGCCATAGCTGAAGTCGCACATCATACCAAAGAAGCTACAGTAGCTCTCATTTGTCGCCAACTTAGCCCGTGATATCAATTCTG  
CCCCTCCGCTGAAATGGCCGAATCTTCTATGCCACCACACTATG

>PhRXLR15\_334 PLHAL3340702

CTAAGTTCGGTCTCATGGGTGGCGCTTTCTCCAAGGTCGCTGTGCTCATCATTTTCAGCCCCCACCCTCACAGCTGTTAAATCCTACG  
TCCCCAATTCTCAGACGGAGCAAAATCATGACATCGTGCCGATTGGTGGTACAGACACCGATATGTTGCCAAGAGATCTCTCCAAG  
GGAGTTATGACCAAGTAGCGATCCCTGTGGTTGAAGAAGAGCGTGCATCTTTAGCTAATTTGATTGAAAATGCAGGAGAAGATGCCA  
TTAGAATACTGGTTTCTTTCACATATGGAGATCACTGAAAATAACGTTCTGGAGTGTTTAGAAAAGAAGATTATGAATGGAGAATACC  
TCGGTTCTCCCGCCGACCGAGATGCCATCATCAAGTTATCCTCTTACCACGCCAAAAAAGTTGAAGAGGGCAACGATATATCAACCG  
CAACCACGAATATAATGAATCGCTATGACCCGATCTCTTTTATCCGTCGAGATGTCAAAGCTCTACATGATGGCTCCTCCGTCGCCG  
CCAGTAAAGACATCCAATTTCTTGAGGAGGCCTTCGACATTTACATGTTTTGCGTCGGCGAAAATTGAGAACTACGCTCAAGAATTAA  
AAGACGCCATAGCTGAAGTCGCACATCATACCAAAGAAGCTACAGTAGCTCTCATTTGTCGCCAACTTAGCCCGTGATATCAATTCTG  
CCCCTCCGCTGAAATGGCCGAATCTTCTATGCCACCACACTATG

>PhRXLR15\_703 PLHAL7030737

CTAAGTTCGGTCTCATGGGTGGCGCTTTCTCCAAGGTCGCTGTGCTCATCATTTTCAGCCCCCACCCTCACAGCTGTTAAATCCTACG  
TCCCCAATTCTCAGACGGAGCAAAATCATGACATCGTGCCGATTGGTGGTACAGACACCGATATGTTGCCAAGAGATCTCTCCAAG  
GGAGTTATGACCAAGTAGCGATCCCTGTGGTTGAAGAAGAGCGTGCATCTTTAGCTAATTTGATTGAAAATGCAGGAGAAGATGCCA  
TTAGAATACTGATTTCTTTCACATATGGAGAGGACTGAAAATAACGTTCCGGAGTGTTTAGAAAAGAAGATTATGAATGGAGAATACC  
TCGGTTCTCCCGCCGACCGAGATGCCATCATCAAGTTATCCTCTTACCACGCCAAAAAAGTTGAAGAGGGCAACGATATATCAACCG  
CAACCACGAATATAATGAATCGCTATGACCCGATCTCTTTTATCCGTCGAGATGTCAAAGCTCTACATGATGGCTCCTCCGTCGCCG  
CCAGTAAAGACATCCAATTTCTTGAGGAGGCCTTCGACATTTACATGTTTTGCGTCGGCGAAAATTGAGAACTACGCTCAAGAATTAA  
AAGACGCCATAGCTGAAGTCGCACATCATACCAAAGAAGCTACAGTAGCTCTCATTTGTCGCCAACTTAGCCCGTGATATCAATTCTG  
CCCCTCCGCTGAAATGGCCGAATCTTCTATGCCACCACACTATG

>PhRXLR15\_710 PLHAL7100720

CTAAGTTCGGTCTCATGGGTGGCGCTTTCTCCAAGGTCGCTGTGCTCATCATTTTCAGCCCCCACCCTCACAGCTGTTAAATCCTACG  
TCCCCAATTCTCAGACGGAGCAAAATCATGACATCGTGCCGATTGGTGGTACAGACACCGATATGTTGCCAAGAGATCTCTCCAAG  
GGAGTTATGACCAAGTAGCGATCCCTGTGGTTGAAGAAGAGCGTGCATCTTTAGCTAATTTGATTGAAAATGCAGGAGAAGATGCCA  
TTAGAATACTGGTTTCTTTCACATATGGAGAGGACTGAAAATAACGTTCTGGAGTGTTTAGAAAAGAAGATTATGAATGGAGAATACC  
TCGGTTCTCCCGCCGACCGAGATGCCATCATCAAGTTATCCTCTTACCACGCCAAAAAAGTTGAAGAGGGCAACGATATATCAACCG  
CAACCACGAATATAATGAATCGCTATGACCCGATCTCTTTTATCCGTCGAGATGTCAAAGCTCTACATGATGGCTCCTCCGTCGCCG  
CCAGTAAAGACATCCAATTTCTTGAGGAGGCCTTCGACATTTACATGTTTTGCGTCGGCGAAAATTGAGAACTACGCTCAAGAATTAA  
AAGACGCCATAGCTGAAGTCGCACATCATACCAAAGAAGCTACAGTAGCTCTCATTTGTCGCCAACTTAGCCCGTGATATCAATTCTG  
CCCCTCCGCTGAAATGGCCGAATCTTCTATGCCACCACACTATG

>PhRXLR15\_304 PLHAL3040711

CTAAGTTCGGTCTCATGGGTGGCGCTTTCTCCAAGGTCGCTGTGCTCATCATTTTCAGCCCCCACCCTCACAGCTGTTAAATCCTACG  
TCCCCAATTCTCAGACGGAGCAAAATCATGACATCGTGCCGATTGGTGGTACAGACACCGATATGTTGCCAAGAGATCTCTCCAAG  
GGAGTTATGACCAAGTAGCGATCCCTGTGGTTGAAGAAGAGCGTGCATCTTTAGCTAATTTGATTGAAAATGCAGGAGAAGATGCCA  
TTAGAATACTGGTTTCTTTCACATATGGAGAGGACTGAAAATAACGTTCTGGAGTGTTTAGAAAAGAAGATTATGAATGGAGAATACC  
TCGGTTCTCCCGCCGACCGAGATGCCATCATCAAGTTATCCTCTTACCACGCCAAAAAAGTTGAAGAGGGCAACGATATATCAACCG  
CAACCACGAATATAATGAATCGCTATGACCCGATCTCTTTTATCCGTCGAGATGTCAAAGCTCTACATGATGGCTCCTCCGTCGCCG  
CCAGTAAAGACATCCAATTTCTTGAGGAGGCCTTCGACATTTACATGTTTTGCGTCGGCGAAAATTGAGAACTACGCTCAAGAATTAA  
AAGACGCCATAGCTGAAGTCGCACATCATACCAAAGAAGCTACAGTAGCTCTCATTTGTCGCCAACTTAGCCCGTGATATCAATTCTG  
CCCCTCCGCTGAAATGGCCGAATCTTCTATGCCACCACACTATG

>PhRXLR15\_700 PLHAL7000699

CTAAGTTCGGTCTCATGGGTGGCGCTTTCTCCAAGGTCGCTGTGCTCATCATTTTCAGCCCCCACCCTCACAGCTGTTAAATCCTACG  
TCCCCAATTCTCAGACGGAGCAAAATCATGACATCGTGCCGATTGGTGGTACAGACACCGATATGTTGCCAAGAGATCTCTCCAAG  
GGAGTTATGACCAAGTAGCGATCCCTGTGGTTGAAGAAGAGCGTGCATCTTTAGCTAATTTGATTGAAAATGCAGGAGAAGATGCCA  
TTAGAATACTGGTTTCTTTCACATATGGAGAGGACTGAAAATAACGTTCTGGAGTGTTTAGAAAAGAAGATTATGAATGGAGAATACC  
TCGGTTCTCCCGCCGACCGAGATGCCATCATCAAGTTATCCTCTTACCACGCCAAAAAAGTTGAAGAGGGCAACGATATATCAACCG  
CAACCACGAATATAATGAATCGCTATGACCCGATCTCTTTTATCCGTCGAGATGTCAAAGCTCTACATGATGGCTCCTCCGTCGCCG  
CCAGTAAAGACATCCAATTTCTTGAGGAGGCCTTCGACATTTACATGTTTTGCGTCGGCGAAAATTGAGAACTACGCTCAAGAATTAA  
AAGACGCCATAGCTGAAGTCGCACATCATACCAAAGAAGCTACAGTAGCTCTCATTTGTCGCCAACTTAGCCCGTGATATCAATTCTG  
CCCCTCCGCTGAAATGGCCGAATCTTCTATGCCACCACACTATG

>PhRXLR15\_730 PLHAL7300744

CTAAGTTCGGTCTCATGGGTGGCGCTTTCTCCAAGGTCGCTGTGCTCATCATTTTCAGCCCCCACCCTCACAGCTGTTAAATCCTACG  
TCCCCAATTCTCAGACGGAGCAAAATCATGACATCGTGCCGATTGGTGGTACAGACACCGATATGTTGCCAAGAGATCTCTCCAAG

GGAGTTATGACCAAGTAGCGATCCCTGTGGTTGAAGAAGAGCGTGCATCTTTAGCTAATTTGATTGAAAATGCAGGAGAAGATGCCA  
TTAGAATACTGGTTTCTTTCACATATGGAGAGGACTGAAAATAACGTTCTGGAGTGTTTAGAAAAGAAGATTATGAATGGAGAATACC  
TCGGTTCTCCCGCCGACCGAGATGCCATCATCAAGTTATCCTCTTACCACGCCAAAAAAGTTGAAGAGGGCAACGATATATCAACCG  
CAACCACGAATATAATGAATCGCTATGACCCGATCTCTTTTATCCGTCGAGATGTCAAAGCTTACATGATGGCTCCTCCGTCGCCG  
CCAGTAAAGACATCCAATTTCTTGAGGAGGCCCTTCGACATTTACATGTTTTGCGTCGGCGAAATTTGAGAACTACGCTCAAGAATTA  
AAGACGCCATAGCTGAAGTGCACATCATACAAAAGAAGCTACAGTAGCTCTCATTTGTCGCCAACTTAGCCCGTGATATCAATTTCTG  
CCCCTCCGCTGAAATGGCCGAATCTTCTATGCCACCACACTATG

>PhRXLR18\_100 PLHAL100A10251

GCATAAGTTTTAGCGAGAAACATTGTTATTCATACACATAGCAAATGCTTCATCGTCTCCAAGCCTCCAGTGGCATCCAAGATCTG  
CGAAGATGCTCTTTGCTTTTCATTTTCGTTATCATGTCTGTGGCTGTGTCTGGAAACATCAGTTATGCCATCACAGCCACGCAAGTTC  
AACAAACGTTGGCCTTAAGGAGCGCTCGTTGGAAGCCTTCGACCTCGCTAAAACTTCTGAAGCGAGAAGGTTTTCTGCGAAGTAGAGA  
GCTTGACGCCGTGAAGGAAGAGCGTGTCTCTTCTAAAATGGATTTTCATCCAGAATCAGAATTCAGCTCCAAGGTCCTGAAGGCCGAT  
CAAGAAGTCAAATAAAGAGCATAACAACGCATTTATGCTAACACGTAAGCCCAAGACTCCTTTGAGCAAATCTAGATTTAAAAGAGA  
GGTGCTGGTGGATGCCGCTTTCGATAAACTTAACAATCTAAAACCTTGATAATCCTAATAGACCGTAATGAGACACAGCTCCATTTTT  
TCATAT

>PhRXLR18\_334 PLHAL3340167

GCATAAGTTTTAGCGAGAAACATTGTTATTCATACACATAGCAAATGCTTCATCGTCTCCAAGCCTCCAGTGGCATCCAAGATCTG  
CGAAGATGCTCTTTGCTTTTCATTTTCGTTATCATGTCTGTGGCAGTGTCTGGAAACATCAGTTATGCCATCACAGCCACGCAAGTTC  
AACAAACGTTGGCCTTGAGCGAGCGCTCGTTGGAAGCCTTCGACCTCGCTAAAACTTCTGAAGCGAGAAGGTTTTCTGCGAAGTAGAG  
AGCTTGACGCCGTGAAGGAAGAGCGTGTCTCTTCTAAAATGGATTTTCATCCAGAATCAGAATTCAGCTCCAAGGTCCTGAAGGCCG  
TCAAGAAGTCAAATAAAGAGCATAACAACGCATTTATGCTATCACGTAAGCCCAAGACTCCTTTGAGCAAATCTAGATTTAAAAGAG  
AGGTGCTGGTGGATGCCGCTTTCGATAAACTTAACAATTTAAAACCTTGATTATCCTAATAGACCGTAATGAGACACAGCTCCATTTTT  
TTCATAT

>PhRXLR18\_703 PLHAL70302937

GCATAAGTTTTAGCGAGAAACATTGTTATTCATACACATAGCAAATGCTTCATCGTCTCCAAGCCTCCAGTGGCATCCAAGATCTG  
CGAAGATGCTCTTTGCTTTTCATTTTCGTTATCATGTCTGTGGCAGTGTCTGGAAACATCAGTTATGCCATCACAGCCACGCAAGTTC  
AACAAACGTTGGCCTTGAGCGAGCGCTCGTTGGAAGCCTTCGACCTCGCTAAAACTTCTGAAGCGAGAAGGTTTTCTGCGAAGTAGAG  
AGCTTGACGCCGTGAAGGAAGAGCGTGTCTCTTCTAAAATGGATTTTCATCCAGAATCAGAATTCAGCTCCAAGGTCCTGAAGGCCG  
TCAAGAAGTCAAATAAAGAGCATAACAACGCATTTATGCTATCACGTAAGCCCAAGACTCCTTTGAGCAAATCTAGATTTAAAAGAG  
AGGTGCTGGTGGATGCCGCTTTCGATAAACTTAACAATTTAAAACCTTGATTATCCTAATAGACCGTAATGAGACACAGCTCCATTTTT  
TTCATAT

>PhRXLR18\_710 PLHAL7100338

GCATAAGTTTTAGCGAGAAACATTGTTATTCATACACATAGCAAATGCTTCATCGTCTCCAAGCCTCCAGTGGCATCCAAGATCTG  
CGAAGATGCTCTTTGCTTTTCATTTTCGTTATCATGTCTGTGGCAGTGTCTGGAAACATCAGTTATGCCATCACAGCCACGCAAGTTC  
AACAAACGTTGGCCTTGAGCGAGCGCTCGTTGGAAGCCTTCGACCTCGCTAAAACTTCTGAAGCGAGAAGGTTTTCTGCGAAGTAGAG  
AGCTTGACGCCGTGAAGGAAGAGCGTGTCTCTTCTAAAATGGATTTTCATCCAGAATCAGAATTCAGCTCCAAGGTCCTGAAGGCCG  
TCAAGAAGTCAAATAAAGAGCATAACAACGCATTTATGCTATCACGTAAGCCCAAGACTCCTTTGAGCAAATCTAGATTTAAAAGAG  
AGGTGCTGGTGGATGCCGCTTTCGATAAACTTAACAATTTAAAACCTTGATTATCCTAATAGACCGTAATGAGACACAGCTCCATTTTT  
TTCATAT

>PhRXLR18\_304 PLHAL3040327

GCATAAGTTTTAGCGAGAAACATTGTTATTCATACACATAGCAAATGCTTCATCGTCTCCAAGCCTCCAGTGGCATCCAAGATCTG  
CGAAGATGCTCTTTGCTTTTCATTTTCGTTATCATGTCTGTGGCAGTGTCTGGAAACATCAGTTATGCCATCACAGCCACGCAAGTTC  
AACAAACGTTGGCCTTAAGGAGCGCTCGTTGGAAGCCTTCGACCTCGCTAAAACTTCTGAAGCGAGAAGGTTTTCTGCGAAGTAGAGA  
GCTTGACGCCGTGAAGGAAGAGCGTGTCTCTTCTAAAATGGATTTTCATCCAGAATCAGAATTCAGCTCCAAGGTCCTGAAGGCCGAT  
CAAGAAGTCAAATAAAGAGCATAACAACGCATTTATGCTAACACGTAAGCCCAAGACTCCTTTGAGCAAATCTAGATTTAAAAGAGA  
GGTGCTGGTGGATGCCGCTTTCGATAAACTTAACAATCTAAAACCTTGATAATCCTAATAGACCGTAATGAGACACAGCTCCATTTTT  
TCATAT

>PhRXLR18\_700 PLHAL7000181

GCATAAGTTTTAGCGAGAAACATTGTTATTCATACACATAGCAAATGCTTCATCGTCTCCAAGCCTCCAGTGGCATCCAAGATCTG  
CGAAGATGCTCTTTGCTTTTCATTTTCGTTATCATGTCTGTGGCAGTGTCTGGAAACATCAGTTATGCCATCACAGCCACGCAAGTTC  
AACAAACGTTGGCCTTGAGCGAGCGCTCGTTGGAAGCCTTCGACCTCGCTAAAACTTCTGAAGCGAGAAGGTTTTCTGCGAAGTAGAG  
AGCTTGACGCCGTGAAGGAAGAGCGTGTCTCTTCTAAAATGGATTTTCATCCAGAATCAGAATTCAGCTCCAAGGTCCTGAAGGCCG  
TCAAGAAGTCAAATAAAGAGCATAACAACGCATTTATGCTATCACGTAAGCCCAAGACTCCTTTGAGCAAATCTAGATTTAAAAGAG  
AGGTGCTGGTGGATGCCGCTTTCGATAAACTTAACAATTTAAAACCTTGATTATCCTAATAGACCGTAATGAGACACAGCTCCATTTTT  
TTCATAT

>PhRXLR18\_730 PLHAL7300012

GCATAAGTTTTAGCGAGAAACATTGTTATTCATACACATAGCAAATGCTTCATCGTCTCCAAGCCTCCAGTGGCATCCAAGATCTG  
CGAAGATGCTCTTTGCTTTTCATTTTCGTTATCATGTCTGTGGCAGTGTCTGGAAACATCAGTTATGCCATCACAGCCACGCAAGTTC  
AACAAACGTTGGCCTTGAGCGAGCGCTCGTTGGAAGCCTTCGACCTCGCTAAAACTTCTGAAGCGAGAAGGTTTTCTGCGAAGTAGAG  
AGCTTGACGCCGTGAAGGAAGAGCGTGTCTCTTCTAAAATGGATTTTCATCCAGAATCAGAATTCAGCTCCAAGGTCCTGAAGGCCG  
TCAAGAAGTCAAATAAAGAGCATAACAACGCATTTATGCTATCACGTAAGCCCAAGACTCCTTTGAGCAAATCTAGATTTAAAAGAG  
AGGTGCTGGTGGATGCCGCTTTCGATAAACTTAACAATTTAAAACCTTGATTATCCTAATAGACCGTAATGAGACACAGCTCCATTTTT  
TTCATAT

>PhRXLR22\_100 PLHAL100A11736

TCATGTTGCAATTTCGCGACTGCTTTTCCTTGCAATCAGTGCAAACGTTGTCATGACGCAGCCAAATCAAGAATACATTGCTCCCGGGG  
CTCGTGTGAGCTCTAATTACCGCGACATGACCATCCGCCGCTTACGTACTCACGAAATTTGGGACAGTCCCAGAAGAGAGGATGCCTA  
TACACGAATTGGAAATTGAAGATCTAATCACCATTATCGCCTCTAAGGTGGTCCCCGAATTATCGCACTCTGAGTCAATGTCTCTAC  
TAAGCGCTGAGGCAGCACGGAGTCGGAGTTTTAAGGATATGGCAGCTGATGAACTCGATGTGGATGGTGCCTGGATTTGCTAAAAG  
CTGTGCAATCAAAGCCGGAAACCACAGACATGACTCC

>PhRXLR22\_334 PLHAL3341813

TCATGTTGCAATTTCGCGACTGCTTTTCCTTGCAATCAGTGCAAACGTTGTCATGACGCAGCCAAATCAAGAATACATTGCTCCCGGGG  
CTCGTGTGAGCTCTAATTACCGCGACATGACCATCCGCCGCTTACGTACTCACGAAATTTGGGACAGTCCCAGAAGAGAGGATGCCTA  
TACACGAATTGGAAATTGAAGATCTAATCACCATTATCGCCTCTAAGGTGGTCCCCGAATTATCGCACTCTGAGTCAATGTCTCTAC  
TAAGCGCTGAGGCAGCACGGAGTCGGAGTTTTAAGGATATGGCAGCTGATGAACTCGATGTGGATGGTGCCTGGATTTGCTAAAAG  
CTGTGCAATCAAAGCCGGAAACCACAGACATGACTCC

>PhRXLR22\_703 PLHAL7031639

TCATGTTGCAATTTCGCGACTGCTTTTCCTTGCAATCAGTGCAAACGTTGTCATGACGCAGCCAAATCAAGAATACATTGCTCCCGGGG  
CTCGTGTGAGCTCTAATTACCGCGACATGACCATCCGCCGCTTACGTACTCACGAAATTTGGGACAGTCCCAGAAGAGAGGATGCCTA  
TACACGAATTGGAAATTGAAGATCTAATCACCATTATCGCCTCTAAGGTGGTCCCCGAATTATCGCACTCTGAGTCAATGTCTCTAC  
TAAGCGCTGAGGCAGCACGGAGTCGGAGTTTTAAGGATATGGCAGCTGATGAACTCGATGTGGATGGTGCCTGGATTTGCTAAAAG  
CTGTGCAATCAAAGCCGGAAACCACAGACATGACTCC

>PhRXLR22\_710 PLHAL7101461

TCATGTTGCAATTTCGCGACTGCTTTTCCTTGCAATCAGTGCAAACGTTGTCATGACGCAGCCAAATCAAGAATACATTGCTCCCGGGG  
CTCGTGTGAGCTCTAATTACCGCGACATGACCATCCGCCGCTTACGTACTCACGAAATTTGGGACAGTCCCAGAAGAGAGGATGCCTA  
TACACGAATTGGAAATTGAAGATCTAATCACCATTATCGCCTCTAAGGTGGTCCCCGAATTATCGCACTCTGAGTCAATGTCTCTAC  
TAAGCGCTGAGGCAGCACGGAGTCGGAGTTTTAAGGATATGGCAGCTGATGAACTCGATGTGGATGGTGCCTGGATTTGCTAAAAG  
CTGTGCAATCAAAGCCGGAAACCACAGACATGACTCC

>PhRXLR22\_304 PLHAL3041724

TCATGTTGCAATTTCGCGACTGCTTTTCCTTGCAATCAGTGCAAACGTTGTCATGACGCAGCCAAATCAAGAATACATTGCTCCCGGGG  
CTCGTGTGAGCTCTAATTACCGCGACATGACCATCCGCCGCTTACGTACTCACGAAATTTGGGACAGTCCCAGAAGAGAGGATGCCTA  
TACACGAATTGGAAATTGAAGATCTAATCACCATTATCGCCTCTAAGGTGGTCCCCGAATTATCGCACTCTGAGTCAATGTCTCTAC  
TAAGCGCTGAGGCAGCACGGAGTCGGAGTTTTAAGGATATGGCAGCTGATGAACTCGATGTGGATGGTGCCTGGATTTGCTAAAAG  
CTGTGCAATCAAAGCCGGAAACCACAGACATGACTCC

>PhRXLR22\_700 PLHAL7001969

TCATGTTGCAATTTCGCGACTGCTTTTCCTTGCAATCAGTGCAAACGTTGTCATGACGCAGCCAAATCAAGAATACATTGCTCCCGGGG  
CTCGTGTGAGCTCTAATTACCGCGACATGACCATCCGCCGCTTACGTACTCACGAAATTTGGGACAGTCCCAGAAGAGAGGATGCCTA  
TACACGAATTGGAAATTGAAGATCTAATCACCATTATCGCCTCTAAGGTGGTCCCCGAATTATCGCACTCTGAGTCAATGTCTCTAC  
TAAGCGCTGAGGCAGCACGGAGTCGGAGTTTTAAGGATATGGCAGCTGATGAACTCGATGTGGATGGTGCCTGGATTTGCTAAAAG  
CTGTGCAATCAAAGCCGGAAACCACAGACATGACTCC

>PhRXLR22\_730 PLHAL7301675

TCATGTTGCAATTTCGCGACTGCTTTTCCTTGCAATCAGTGCAAACGTTGTCATGACGCAGCCAAATCAAGAATACATTGCTCCCGGGG  
CTCGTGTGAGCTCTAATTACCGCGACATGACCATCCGCCGCTTACGTACTCACGAAATTTGGGACAGTCCCAGAAGAGAGGATGCCTA  
TACACGAATTGGAAATTGAAGATCTAATCACCATTATCGCCTCTAAGGTGGTCCCCGAATTATCGCACTCTGAGTCAATGTCTCTAC  
TAAGCGCTGAGGCAGCACGGAGTCGGAGTTTTAAGGATATGGCAGCTGATGAACTCGATGTGGATGGTGCCTGGATTTGCTAAAAG  
CTGTGCAATCAAAGCCGGAAACCACAGACATGACTCC

>PhRXLR24\_100 PLHAL100A10037

TTTGAACCCCAAATAACGAGTCCATAAAGCGACTTTTTCTCGAGAATAAGTTTAGGTGGGTGTGAAATCTTTTTTCATGGGTACGGT  
CGACAAGCGGAGTTCAAGCAAATTTTCGCTGAGCGGAGACAGAGCTTGACGAAACGCTACCCTCTCTTCGTCACCAATCACTTCCTT  
TTGTTCTTGTGAATCTTGCGCCCTTAGTTGGCGATCGCTTGATCCCGTTCATTGCTCTGAAGAGTTTGATTTGAGGTGGAGAGTTC  
TGCAAAGACGTCGACGAGTAGAACCACAGCGTAAAGAAGATGCAGCACGAAGGAAAAATATGGTCTGCGCATAGTGGTTTAGTGTTG  
TAGGATGAGTTGGTAAGACTGACCGAGCAGAAT

>PhRXLR24\_334 PLHAL3340018

TTTGAACCCCAAATAACGAGTCCATAAAGCGACTTTTTCTCGAGAATAAGTTTAGGTGGGTGTGAAATCTTTTTTCATGGGTACGGT  
CGACAAGCGGAGTTCAAGCAAATTTTCGCTGAGCGGAGACAGAGCTTGACGAAACGCTACCCTCTCTTCGTCACCAATCACTTCCTT  
TTGTTCTTGTGAATCTTGCGCCCTTAGTTGGCGATCGCTTGATCCCGTTCATTGCTCTGAAGAGTTTGATTTGAGGTGGAGAGTTC  
TGCAAAGACGTCGACGAGTAGAACCACAGCGTAAAGAAGATGCAGCACGAAGGAAAAATATGGTCTGCGCATAGTGGTTTAGTGTTG  
TAGGATGAGTTGGTAAGACTGACCGAGCAGAAT

>PhRXLR24\_703 PLHAL7030805

TTTGAACCCCAAATAACGAGTCCATAAAGCGACTTTTTCTCGAGAATAAGTTTCTTAGGTGGGTGTGAAATCTTTTTTCATGGGTAC  
GGTTCGACAAGCGGAGTTCAAGCAAATTTTCGCTGAGCGGAGACAGAGCTTGACGAAACGCTACCCTCTCTTCGTCACCAATCACTTC  
CTTTTGTCTTGTGAATCTTGCGCCCTTAGTTGGCGATCGCTTGATCCCGTTCATTGCTCTGAAGAGTTTGATTTGAGGTGGAGAG  
TTCTGCAAAGACGTCGACGAGTAGAACCACAGCGTAAAGAAGATGCAGCACGAAGGAAAAATATGGTCTGCGCATAGTGGTTTAGTG  
TTGTAGGATGAGTTGGTAAGACTGACCGAGCAGAAT

>PhRXLR24\_710 PLHAL7100765

TTTGAACCCCAAATAACGAGTCCATAAAGCGACTTTTTCTCGAGAATAAGTTTCTTAGGTGGGTGTGAAATCTTTTTTCATGGGTAC  
GGTTCGACAAGCGGAGTTCAAGCAAATTTTCGCTGAGCGGAGACAGAGCTTGACGAAACGCTACCCTCTCTTCGTCACCAATCACTTC  
CTTTTGTCTTGTGAATCTTGCGCCCTTAGTTGGCGATCGCTTGATCCCGTTCATTGCTCTGAAGAGTTTGATTTGAGGTGGAGAG  
TTCTGCAAAGACGTCGACGAGTAGAACCACAGCGTAAAGAAGATGCAGCACGAAGGAAAAATATGGTCTGCGCATAGTGGTTTAGTG  
TTGTAGGATGAGTTGGTAAGACTGACCGAGCAGAAT

>PhRXLR24\_304 PLHAL3040428

TTTGAACCCCAAATAACGAGTCCATAAAGCGACTTTTTCTCGAGAACTAAGTTTAGGTGGGTGTGAAATCTTTTTTCATGGGTACGGT  
CGACAAGCGGAGTTCAAGCAAATTTTCGCTGAGCGGAGACAGAGCTTGACGAAACGCTACCCCTCTCTTCGTACCAATCACTTCCTT  
TTGTTCTTGTGAATCTTGCGCCCTTAGTTGGCGATCGCTTGCATCCCGTTCATTGCTCTGAAGAGTTTGATTTGAGGTGGAGAGTTC  
TGCAAAGACGTCGACGAGTAGAACCACAGCGTAAAGAAGATGCAGCACGAAGGAAAAATATGGTCTGCGCATAGTGGTTTAGTGTTG  
TAGGATGAGTTGGTAAGACTGACCGAGCAGAAT

>PhRXLR24\_700 PLHAL7000772

TTTGAACCCCAAATAACGAGTCCATAAAGCGACTTTTTCTCGAGAACTAAGTTCTTTAGGTGGGTGTGAAATCTTTTTTCATGGGTAC  
GGTTCGACAAGCGGAGTTCAAGCAAATTTTCGCTGAGCGGAGACAGAGCTTGACGAAACGCTACCCCTCTCTTCGTACCAATCACTTC  
CTTTTGTCTTGTGAATCTTGCGCCCTTAGTTGGCGATCGCTTGCATCCCGTTCATTGCTCTGAAGAGTTTGATTTGAGGTGGAGAG  
TTCTGCAAAGACGTCGACGAGTAGAACCACAGCGTAAAGAAGATGCAGCACGAAGGAAAAATATGGTCTGCGCATAGTGGTTTAGTG  
TTGTAGGATGAGTTGGTAAGACTGACCGAGCAGAAT

>PhRXLR24\_730 PLHAL7300813

TTTGAACCCCAAATAACGAGTCCATAAAGCGACTTTTTCTCGAGAACTAAGTTCTTTAGGTGGGTGTGAAATCTTTTTTCATGGGTAC  
GGTTCGACAAGCGGAGTTCAAGCAAATTTTCGCTGAGCGGAGACAGAGCTTGACGAAACGCTACCCCTCTCTTCGTACCAATCACTTC  
CTTTTGTCTTGTGAATCTTGCGCCCTTAGTTGGCGATCGCTTGCATCCCGTTCATTGCTCTGAAGAGTTTGATTTGAGGTGGAGAG  
TTCTGCAAAGACGTCGACGAGTAGAACCACAGCGTAAAGAAGATGCAGCACGAAGGAAAAATATGGTCTGCGCATAGTGGTTTAGTG  
TTGTAGGATGAGTTGGTAAGACTGACCGAGCAGAAT

>PhRXLR31\_100 PLHAL100A10522

AATAAAGTAGAAATATATTACTTCTTGTATCTTTCTACGATGAAAGGTCGCAATCTTAATGAGATCCACGTTATACCATCGCTATGA  
CTGAAGATGACAATGAGAGAAGATTTTTGCGTCGGCTTAAATGAAACCAACAAAGATACACGCGACTGCTTAACGAGCAAAGATAT  
GGACATCAGTCTTGATTCACTTTTTCTATTTCCCAAGAGCGTCTCAACACTTAAAAATGAAGATCATTGCGACAGCAACAATTTCTGG  
CATGGCATTACTCCATGTTGCAACCCCAACGATTGCTGCCGTTGCCCTTTTCGTCCCGCACTCGAAGCAGACGAAACGAATAAGCAGCA  
ACAAGATGCACAAGACGAGGAACGAGCACTTGCTGCTGAGAATCATGACGCAACAGCAAGTGGAGACTGGAATGCTCTTCTTGC  
TCGAGAGACGCGTGCTCTAGCGTATATTCTTGAGGCAGCAGATATTATCGATGAAGAAGATAACTATGAGGAAGAGGAGGACGACTA  
TGAAGATGAAGATTTGCTTGCATCTGGTGGAAAGACGCCGTCGACTAGCTGATGGTGGACGACGTCGAGCGCTAGCGAATGGTGGAA  
ACGTCGAGCGCTTGCTAATGGTGGAAAGACGTCGAGCGCTTGCTAATGGTGGAAAGACGTCGAGCTCTGGCTGACGGTGGAAAGACGTC  
TGCTCTTGCTGATGGTGGAAAGACGTCGAGCTCTTGCTGATGGTGGAAAGACGTCGAGCTCTTGCTGATGATCATTAGCGATAACAATGA  
TAAGCTTCTGAACTCGAACGTGGATGACCAAAGGGTCGGACGCAGTGCATATTCAACATTCGTTATAAATGATTTTTGTTATTTTG  
TGTTTTTTATAAAAAACACAAATATAGCAATATTCTTAGCAGTCTTGTCAAAAATGATATAAGTTACTCGATAAGATTCTAATGACA  
GGATAAATACAAAGTTCAAAAAAT

>PhRXLR31\_334 PLHAL3340691

AATAAAGTAGAAATATATTACTTCTTGTATCTTTCTACGATGAAAGGTCGCAATCTTAATGAGATCCACGTTATACCATCGCTATGA  
CTGAAGATGACAATGAGAGAAGATCTTTGCGTCGGCTTAAATGAAACCAACAAAGATACACGCGACTGCTTAACGAGCAAAGATAT  
GGACATCAGTCTTGATTCACTTTTTCTATTTCCCAAGAGCGTCTCAACACTTAAAAATGAAGATCATTGCGACAGCAACAATTTCTGG  
CATGGCATTACTCCATGTTGCAACCCCAACGATTGCTGCCGTTGCCCTTTTCGTCCCGCACTCGAAGCAGACGAAACGAATAAGCAGCA  
ACAAGATGCACAAGACGAGGAACGAGCACTTGCTGCTGAGAATCAAGACGCAACAGCAAGTGGAGACTGGAATGCTCTTCTTGC  
TCGAGAGACGCGTGCTCTAGCGTATATTCTTGAGGCAGCAGATATTATCGATGAAGAAGATAACTATGAGGAAGAGGAGGACGACTA  
TGAAGATGAAGATTTGCTTGCATCTGGTGGAAAGACGCCGTCGACTAGCTGATGGTGGACGACGCCGAGCGCTAGCGAATGGTGGACG  
ACGTCGAGCGCTTGCTAATGGTGGAAAGACGTCGAGCGCTTGCTAATGGTGGAAAGACGTCGAGCTCTGGCTGACGGTGGAAAGACGTC  
TGCTCTTGCTGATGGTGGAAAGACGTCGAGCTCTTGCTGATGGTGGAAAGACGTCGAGCTCTTGCTGATGGTGGAAAGACGTCGAGCTCT  
TGCTGATGATCATTAGCGATAACAATGATAAGCTTCTGAACTCGAACGTGGATGACCAAAGGGTCGGACGCAGTGCATATTCAACAT  
TCGTTATAAATGATTTTTGTTATTTTGTGTTTTTTATAAAAAACACAAATATAGCAATATTCTTAGCAGTCTTGTCAAAAATGATAT  
AAGTTACTCGATAAGATTCTAATGACAGGATAAATACAAAGTTCAAAAAAT

>PhRXLR31\_703 PLHAL7030845

AATAAAGTAGAAATATATTACTTCTTGTATCTTTCTACGATGAAAGGTCGCAATCTTAATGAGATCCACGTTATACCATCGCTATGA  
CTGAAGATGACAATGAGAGAAGATCTTTGCGTCGGCTTAAATGAAACCAACAAAGATACACGCGACTGCTTAACGAGCAAAGATAT  
GGACATCAGTCTTGATTCACTTTTTCTATTTCCCAAGAGCGTCTCAACACTTAAAAATGAAGATCATTGCGACAGCAACAATTTCTGG  
CATGGCATTACTCCATGTTGCAACCCCAACGATTGCTGCCGTTGCCCTTTTCGTCCCGCACTCGAAGCAGACGAAACGAATAAGCAGCA  
ACAAGATGCACAAGACGAGGAACGAGCACTTGCTGCTGAGAATCATGACGCAACAGCAAGTGGAGACTGGAATGCTCTTCTTGC  
TCGAGAGACGCGTGCTCTAGCGTATATTCTTGAGGCAGCAGATATTATCGATGAAGAAGATAACTATGAGGAAGAGGAGGACGACTA  
TGAAGATGAAGATTTGCTTGCATCTGGTGGAAAGACGCCGTCGACTAGCTGATGGTGGACGACGTCGAGCGCTAGCGAATGGTGGAA  
ACGTCGAGCGCTTGCTAATGGTGGAAAGACGTCGAGCGCTTGCTAATGGTGGAAAGACGTCGAGCTCTGGCTGACGGTGGAAAGACGTC  
TGCTCTTGCTGATGGTGGAAAGACGTCGAGCTCTTGCTGATGGTGGAAAGACGTCGAGCTCTTGCTGATGATCATTAGCGATAACAATGA  
TAAGCTTCTGAACTCGAACGTGGATGACCAAAGGGTCGGACGCAGTGCATATTCAACATTCGTTATAAATGATTTTTGTTATTTTG  
TGTTTTTTATAAAAAACACAAATATAGCAATATTCTTAGCAGTCTTGTCAAAAATGATATAAGTTACTCGATAAGATTCTAATGACA  
GGATAAATACAAAGTTCAAAAAAT

>PhRXLR31\_710 PLHAL7100553

AATAAAGTAGAAATATATTACTTCTTGTATCTTTCTACGATGAAAGGTCGCAATCTTAATGAGATCCACGTTATACCATCGCTATGA  
CTGAAGATGACAATGAGAGAAGATCTTTGCGTCGGCTTAAATGAAACCAACAAAGATACACGCGACTGCTTAACGAGCAAAGATAT  
GGACATCAGTCTTGATTCACTTTTTCTATTTCCCAAGAGCGTCTCAACACTTAAAAATGAAGATCATTGCGACAGCAACAATTTCTGG  
CATGGCATTACTCCATGTTGCAACCCCAACGATTGCTGCCGTTGCCCTTTTCGTCCCGCACTCGAAGCAGACGAAACGAATAAGCAGCA  
ACAAGATGCACAAGACGAGGAACGAGCACTTGCTGCTGAGAATCATGACGCAACAGCAAGTGGAGACTGGAATGCTCTTCTTGC  
TCGAGAGACGCGTGCTCTAGCGTATATTCTTGAGGCAGCAGATATTATCGATGAAGAAGATAACTATGAGGAAGAGGAGGACGACTA  
TGAAGATGAAGATTTGCTTGCATCTGGTGGAAAGACGCCGTCGACTAGCTGATGGTGGACGACGTCGAGCGCTAGCGAATGGTGGAA  
ACGTCGAGCGCTTGCTAATGGTGGAAAGACGTCGAGCGCTTGCTAATGGTGGAAAGACGTCGAGCTCTGGCTGACGGTGGAAAGACGTC  
TGCTCTTGCTGATGGTGGAAAGACGTCGAGCTCTTGCTGATGGTGGAAAGACGTCGAGCTCTTGCTGATGATCATTAGCGATAACAATGA  
TAAGCTTCTGAACTCGAACGTGGATGACCAAAGGGTCGGACGCAGTGCATATTCAACATTCGTTATAAATGATTTTTGTTATTTTG  
TGTTTTTTATAAAAAACACAAATATAGCAATATTCTTAGCAGTCTTGTCAAAAATGATATAAGTTACTCGATAAGATTCTAATGACA  
GGATAAATACAAAGTTCAAAAAAT

TGCTCTTGCTGATGGTGGAAAGACGTCGAGCTCTTGCTGATGGTGGAAAGACGTCGAGCTCTTGCTGATGATCATTAGCGATAACAATGA  
TAAGCTTCTGGAACCTCGAACGTGGATGACCAAAGGGTCGGACGCAGTGCATATTTCAACATTCGTTATAAAATGATTTTTTGTATTGTTG  
TGTTTTTTATAAAAAACACAAATATAGCAATATTCTTAGCAGTCTTGTCAAAAATGATATAAGTTACTCGATAAGATTCTAATGACA  
GGATAAATACAAAGTTCAAAAAAT

>PhRXLR31\_304 PLHAL3040833

AATAAAGTAGAAATATATTACTTCTTGTATCTTTCTACGATGAAAGGTCGCAATCTTAATGAGATCCACGTTTATACCATCGCTATGA  
CTGAAGATGACAATGAGAGAAGATTTTTGCGTTCGGCTTAAAAATGAAACCAACAAAAGATACACGCGACTGCTTAACGAGCAAAGATAT  
GGACATCAGTCTTGATTCACTTTTTCTATTTCCCAAGAGCGTCTCAACACTTAAAAATGAAGATCATTGCGACAGCAACAATTTCTTGG  
CATGGCATTACTCCATGTTGCAACCCCAACGATTGCTGCCGTTGCCCTTTCGTCCCGCACTCGAAGCAGACGAAACGAATAAGCAGCA  
ACAAGATGCACAAGACGAGGAACGAGCACTTGTGCTGAGAATCATGACGCAACAGCAAGTGGAGACTGGAATGCTCTTCTTGC  
TCGAGAGACGCGTGTCTAGCGTATATTCTTGAGGCAGCAGATATTATCGATGAAGAAGATAACTATGAGGAAGAGGAGGACGACTA  
TGAAGATGAAGATTTGCTTGCATCTGGTGGAAAGACGCCGTGCACTAGCTGATGGTGGACGACGTCGAGCGCTAGCGAATGGTGGAAAG  
ACGTCGAGCGCTTGCTAATGGTGGAAAGACGTCGAGCGCTTGCTAATGGTGGAAAGACGTCGAGCTCTGGCTGACGGTGGAAAGACGTCG  
TGCTCTTGCTGATGGTGGAAAGACGTCGAGCTCTTGCTGATGGTGGAAAGACGTCGAGCTCTTGCTGATGATCATTAGCGATAACAATGA  
TAAGCTTCTGGAACCTCGAACGTGGATGACCAAAGGGTCGGACGCAGTGCATATTTCAACATTCGTTATAAAATGATTTTTTGTATTGTTG  
TGTTTTTTATAAAAAACACAAATATAGCAATATTCTTAGCAGTCTTGTCAAAAATGATATAAGTTACTCGATAAGATTCTAATGACA  
GGATAAATACAAAGTTCAAAAAAT

>PhRXLR31\_700 PLHAL7000849

AATAAAGTAGAAATATATTACTTCTTGTATCTTTCTACGATGAAAGGTCGCAATCTTAATGAGATCCACGTTTATACCATCGCTATGA  
CTGAAGATGACAATGAGAGAAGATCTTTGCGTTCGGCTTAAAAATGAAACCAACAAAAGATACACGCGACTGCTTAACGAGCAAAGATAT  
GGACATCAGTCTTGATTCACTTTTTCTATTTCCCAAGAGCGTCTCAACACTTAAAAATGAAGATCATTGCGACAGCAACAATTTCTTGG  
CATGGCATTACTCCATGTTGCAACCCCAACGATTGCTGCCGTTGCCCTTTCGTCCCGCACTCGAAGCAGACGAAACGAATAAGCAGCA  
ACAAGATGCACAAGACGAGGAACGAGCACTTGTGCTGAGAATCATGACGCAACAGCAAGTGGAGACTGGAATGCTCTTCTTGC  
TCGAGAGACGCGTGTCTAGCGTATATTCTTGAGGCAGCAGATATTATCGATGAAGAAGATAACTATGAGGAAGAGGAGGACGACTA  
TGAAGATGAAGATTTGCTTGCATCTGGTGGAAAGACGCCGTGCACTAGCTGATGGTGGACGACGTCGAGCGCTAGCGAATGGTGGAAAG  
ACGTCGAGCGCTTGCTAATGGTGGAAAGACGTCGAGCGCTTGCTAATGGTGGAAAGACGTCGAGCTCTGGCTGACGGTGGAAAGACGTCG  
TGCTCTTGCTGATGGTGGAAAGACGTCGAGCTCTTGCTGATGGTGGAAAGACGTCGAGCTCTTGCTGATGATCATTAGCGATAACAATGA  
TAAGCTTCTGGAACCTCGAACGTGGATGACCAAAGGGTCGGACGCAGTGCATATTTCAACATTCGTTATAAAATGATTTTTTGTATTGTTG  
TGTTTTTTATAAAAAACACAAATATAGCAATATTCTTAGCAGTCTTGTCAAAAATGATATAAGTTACTCGATAAGATTCTAATGACA  
GGATAAATACAAAGTTCAAAAAAT

>PhRXLR31\_730 PLHAL7300805

AATAAAGTAGAAATATATTACTTCTTGTATCTTTCTACGATGAAAGGTCGCAATCTTAATGAGATCCACGTTTATACCATCGCTATGA  
CTGAAGATGACAATGAGAGAAGATTTTTGCGTTCGGCTTAAAAATGAAACCAACAAAAGATACACGCGACTGCTTAACGAGCAAAGATAT  
GGACATCAGTCTTGATTCACTTTTTCTATTTCCCAAGAGCGTCTCAACACTTAAAAATGAAGATCATTGCGACAGCAACAATTTCTTGG  
CATGGCATTACTCCATGTTGCAACCCCAACGATTGCTGCCGTTGCCCTTTCGTCCCGCACTCGAAGCAGACGAAACGAATAAGCAGCA  
ACAAGATGCACAAGACGAGGAACGAGCACTTGTGCTGAGAATCATGACGCAACAGCAAGTGGAGACTGGAATGCTCTTCTTGC  
TCGAGAGACGCGTGTCTAGCGTATATTCTTGAGGCAGCAGATATTATCGATGAAGAAGATAACTATGAGGAAGAGGAGGACGACTA  
TGAAGATGAAGATTTGCTTGCATCTGGTGGAAAGACGCCGTGCACTAGCTGATGGTGGACGACGTCGAGCGCTAGCGAATGGTGGAAAG  
ACGTCGAGCGCTTGCTAATGGTGGAAAGACGTCGAGCGCTTGCTAATGGTGGAAAGACGTCGAGCTCTGGCTGACGGTGGAAAGACGTCG  
TGCTCTTGCTGATGGTGGAAAGACGTCGAGCTCTTGCTGATGGTGGAAAGACGTCGAGCTCTTGCTGATGATCATTAGCGATAACAATGA  
TAAGCTTCTGGAACCTCGAACGTGGATGACCAAAGGGTCGGACGCAGTGCATATTTCAACATTCGTTATAAAATGATTTTTTGTATTGTTG  
TGTTTTTTATAAAAAACACAAATATAGCAATATTCTTAGCAGTCTTGTCAAAAATGATATAAGTTACTCGATAAGATTCTAATGACA  
GGATAAATACAAAGTTCAAAAAAT

>PhRXLR32\_100 PLHAL100A10020

AAGAAAACATTTGTCCATCCAGACAACCTCTCCCTCATCAAATCCTGTAAGATAAGCATATGGTTTCTAGCATCAAGGTAAAGTCTGG  
GCGAAGTATGATCCCGCTGCTGTGTCAGTCAGGTTCACTTCGCTTCTTGTCGTTTGCAAACCACACACCCCTCAAGTTGTTTCGACATGCG  
TTACATTTCTTCCACTGTTGATCGTTGTCAGTCTTTGCGGTCTTAAGTGGCACAGCCTCGTCAACAGCTTTGAAGGAAGCCAAAAATGA  
TATCAATGACAACAATGACAAGTCCACTGCGCTGACCGCGCTCAAAGCGCAATCGTTACCACGAGGCAATTGCAATCTCCGACAGC  
CGGCGAAGTTGAGGAAGAACGAGCCTGGCCAATCATTTCGTCAAGCTCAGAGCTATCTGAAATCATTCTATGAATGGATTAAACATTT  
CTTTAAAGCAATGTTTTTAGTCGAAACGCCAGCGTCGAGAAAAATGGTACCATTTCCGCCAACATCTTAGGAGCATGAGGAGAGGCAG  
TCGAAGAATGTACTATGACACAATGGGGAGGATTAATCATGGTTTACGAGAGCGGGTCAATCCATATCAGAGGATTTCCAGAAAGC  
CAAGCACTCAGTAAGCGAAGGCCTCCAAAAGGGATCGCATCGGGTTGGTGAAGAGTGAAGTTATTGAGACATTCAGTGACAGAGCA  
AGCTCAAAGGCAGGACACATGGCCGATAGGGGAGGTAAGCGATTTTGAATTTTCAATCAAGACAGGTCATGCTTAAACGATAGGGGA  
GGTAAGCGATTTTGAATTTTCAATTAAGACAGGTCATGCTTAAAGCCATGGCACTGGTGTATTGATTCCCATTAGCAACCAACGTTGT  
TTCGATCATTTTAGTACATTCATCTTTCTATTCCATAACAATTTTAGACTTGAAAATGCATGGTGTAGCTATTGTT

>PhRXLR32\_334 PLHAL3340020

AAGAAAACATTTGTCCATCCAGACAACCTCTCCCTCATCAAATCCTGTAAGATAAGCATATGGTTTCTAGCATCAAGGTAAAGTCTGG  
GCGAAGTATGATCCCGCTGCTGTGTCAGTCAGGTTCACTTCGCTTCTTGTCGTTTGCAAACCACACACCCCTCAAGTTGTTTCGACATGCG  
TTACATTTCTTCCACTGTTGATCGTTGTCAGTCTTTGCGGTCTTAAGTGGCACAGCCTCGTCAACAGCTTTGAAGGAAGCCAAAAATGA  
TATCAATGACAACAATGACAAGTCCACTGCGCTGACCGCGCTCAAAGCGCAATCGTTACCACGAGGCAATTGCAATCTCCGACAGC  
CGGCGAAGTTGAGGAAGAACGAGCCTGGCCAATCATTTCGTCAAGCTCAGAGCTATCTGAAATCATTCTATGAATGGATTAAACATTT  
CTTTAAAGCAATGTTTTTAGTCGAAACGCCAGCGTCGAGAAAAATGGTACCATTTCCGCCAACATCTTAGGAGCATGAGGAGAGGCAG  
TCGAAGAATGTACTATGACACAATGGGGAGGATTAATCATGGTTTACGAGAGCGGGTCAATCCATATCAGAGGATTTCCAGAAAGC  
CAAGCACTCAGTAAGCGAAGGCCTCCAAAAGGGATCGCATCGGGTTGGTGAAGAGTGGAGTTATTGAGACATTCAGTGACAGAGCA  
AGCTCAAAGGCAGGACACATGGCCGATAGGGGATCTAAGCGAAGCTTGGAAATTTTCAATGAAGACAGGTCATGCTTAAAGCCATGGC  
AGCTCAAAGGCAGGACACATGGCCGATAGGGGATCTAAGCGAAGCTTGGAAATTTTCAATGAAGACAGGTCATGCTTAAAGCCATGGC





AGTTGGGATAGAATGACCGTTTACAAGTTCAATTTTGTATATGAGTATTACAAAACGACGCGTGGAAATGCGGCATCAAGAGAAATG  
TACGAAGCACTTTCTCAACAATCCGATGGTCCGTCCTTGCTTGAATATTGCTCCATAATGGACAGGACGAGCCACTCATCAAGGAC  
AGTTGCAAATCTGTGCGAAGTACGCAATTTTCGCAATGGGCTGAAGATGATAGTAAAAAGCTCGAAAACATTTTCAATTTCTTGGCT  
AACGATTATAATTTGATTTCGGGAAAGAAAACATGAAATGATGATTTTGGCGGAGAGAGTGGATGTAATCAAAAACATCAAGCAGTCT  
TATAGCGACTTTCTCA

>PhRXLR34\_334 PLHAL3340045

AAGGTCAAACCTTACGGCAGACATTGAGAGCCGCTTGCAAAAATTACTTCTTTCTCCTCCTCCTCGTGGGTGGGTTGGAGGTTTATACTG  
TCTGTATATATGTCAGACTGTCACGAAAAAACAATTGCTTCTCATATCTGAAATATTTCGAGCAACACAAAGAACTAAAGAGTAAAT  
GAGAGTTCAATACGCAGTACAACACTAGCTATTGCCGTCGTTGTAATGTGCGTCGACGCTAAGACCTCAATAACAAGCGCCAAGATAAT  
CAGACAGTCAATTTCTTCGTCATCAGCTCTTCCAACCTGCTGACGATAACGGCAGCACCTTTGAACTTGTCCAAAGTGACGAAGAGAG  
GTTTTGGCTAATTCATTATCCGTCGGATCTACTGATGTCAAGCAATTGGTTCATCAATTCGGTATCTAAGTTTTTCAAGATGATTCA  
TTACCCACCGAATAGCCTGTTGAAATCCTGCTTACCTCAATTCACAAGTTGGGAAAAATTGGATTTTCATTAACCTCCGTCATTCACA  
AGTTGGGATAGAATGACCGTTTACAAGTTCAATTTTGTATATGAGTATTACAAAACGACGCGTGGAAATGCGGCATCAAGAGAAATG  
TACGAAGCACTTTCTCAACAATCCGATGGTCCGTCCTTGCTTGAATATTGCTCCATAATGGACAGGACGAGCCACTCATCAAGGAC  
AGTTGCAAATCTGTGCGAAGTACGCAATTTTCGCAATGGGCTGAAGATGATAGTAAAAAGCTCGAAAACATTTTCAATTTCTTGGCT  
AACGATTATAATTTGATTTCGGGAAAGAAAACATGAAATGATGATTTTGGCGGAGAGAGTGGATGTAATCAAAAACATCAAGCAGTCT  
TATAGCGACTTTCTCA

>PhRXLR34\_703 PLHAL7030033

AAGGTCAAACCTTACGGCAGACATTGAGAGCCGCTTGCAAAAATTACTTCTTTCTCCTCCTCCTCGTGGGTGGGTTGGAGGTTTATACTG  
TCTGTATATATGTCAGACTGTCACGAAAAAACAATTGCTTCTCATATCTGAAATATTTCGAGCAACACAAAGAACTAAAGAGTAAAT  
GAGAGTTCAATACGCAGTACAACACTAGCTATTGCCGTCGTTGTAATGTGCGTCGACGCTAAGACCTCAATAACAAGCGCCAAGATAAT  
CAGACAGTCAATTTCTTCGTCATCAGCTCTTCCAACCTGCTGACGATAACGGCAGCACCTTTGAACTTGTCCAAAGTGACGAAGAGAG  
GTTTTGGCTAATTCATTATCCGTCGGATCTACTGATGTCAAGCAATTGGTTCATCAATTCGGTATCTAAGTTTTTCAAGATGATTCA  
TTACCCACCGAATAGCCTGTTGAAATCCTGCTTACCTCAATTCACAAGTTGGGAAAAATTGGATTTTCATTAACCTCCGTCATTCACA  
AGTTGGGATAGAATGACCGTTTACAAGTTCAATTTTGTATATGAGTATTACAAAACGACGCGTGGAAATGCGGCATCAAGAGAAATG  
TACGAAGCACTTTCTCAACAATCCGATGGTCCGTCCTTGCTTGAATATTGCTCCATAATGGACAGGACGAGCCACTCATCAAGGAC  
AGTTGCAAATCTGTGCGAAGTACGCAATTTTCGCAATGGGCTGAAGATGATAGTAAAAAGCTCGAAAACATTTTCAATTTCTTGGCT  
AACGATTATAATTTGATTTCGGGAAAGAAAACATGAAATGATGATTTTGGCGGAGAGAGTGGATGTAATCAAAAACATCAAGCAGTCT  
TATAGCGACTTTCTCA

>PhRXLR34\_710 PLHAL7100064

AAGGTCAAACCTTACGGCAGACATTGAGAGCCGCTTGCAAAAATTACTTCTTTCTCCTCCTCCTCGTGGGTGGGTTGGAGGTTTATACTG  
TCTGTATATATGTCAGACTGTCACGAAAAAACAATTGCTTCTCATATCTGAAATATTTCGAGCAACACAAAGAACTAAAGAGTAAAT  
GAGAGTTCAATACGCAGTACAACACTAGCTATTGCCGTCGTTGTAATGTGCGTCGACGCTAAGACCTCAATAACAAGCGCCAAGATAAT  
CAGACAGTCAATTTCTTCGTCATCAGCTCTTCCAACCTGCTGACGATAACGGCAGCACCTTTGAACTTGTCCAAAGTGACGAAGAGAG  
GTTTTGGCTAATTCATTATCCGTCGGATCTACTGATGTCAAGCAATTGGTTCATCAATTCGGTATCTAAGTTTTTCAAGATGATTCA  
TTACCCACCGAATAGCCTGTTGAAATCCTGCTTACCTCAATTCACAAGTTGGGAAAAATTGGATTTTCATTAACCTCCGTCATTCACA  
AGTTGGGATAGAATGACCGTTTACAAGTTCAATTTTGTATATGAGTATTACAAAACGACGCGTGGAAATGCGGCATCAAGAGAAATG  
TACGAAGCACTTTCTCAACAATCCGATGGTCCGTCCTTGCTTGAATATTGCTCCATAATGGACAGGACGAGCCACTCATCAAGGAC  
AGTTGCAAATCTGTGCGAAGTACGCAATTTTCGCAATGGGCTGAAGATGATAGTAAAAAGCTCGAAAACATTTTCAATTTCTTGGCT  
AACGATTATAATTTGATTTCGGGAAAGAAAACATGAAATGATGATTTTGGCGGAGAGAGTGGATGTAATCAAAAACATCAAGCAGTCT  
TATAGCGACTTTCTCA

>PhRXLR34\_304 PLHAL3040020

AAGGTCAAACCTTACGGCAGACATTGAGAGCCGCTTGCAAAAATTACTTCTTTCTCCTCCTCCTCGTGGGTGGGTTGGAGGTTTATACTG  
TCTGTATATATGTCAGACTGTCACGAAAAAACAATTGCTTCTCATATCTGAAATATTTCGAGCAACACAAAGAACTAAAGAGTAAAT  
GAGAGTTCAATACGCAGTACAACACTAGCTATTGCCGTCGTTGTAATGTGCGTCGACGCTAAGACCTCAATAACAAGCGCCAAGATAAT  
CAGACAGTCAATTTCTTCGTCATCAGCTCTTCCAACCTGCTGACGATAACGGCAGCACCTTTGAACTTGTCCAAAGTGACGAAGAGAG  
GTTTTGGCTAATTCATTATCCGTCGGATCTACTGATGTCAAGCAATTGGTTCATCAATTCGGTATCTAAGTTTTTCAAGATGATTCA  
TTACCCACCGAATAGCCTGTTGAAATCCTGCTTACCTCAATTCACAAGTTGGGAAAAATTGGATTTTCATTAACCTCCGTCATTCACA  
AGTTGGGATAGAATGACCGTTTACAAGTTCAATTTTGTATATGAGTATTACAAAACGACGCGTGGAAATGCGGCATCAAGAGAAATG  
TACGAAGCACTTTCTCAACAATCCGATGGTCCGTCCTTGCTTGAATATTGCTCCATAATGGACAGGACGAGCCACTCATCAAGGAC  
AGTTGCAAATCTGTGCGAAGTACGCAATTTTCGCAATGGGCTGAAGATGATAGTAAAAAGCTCGAAAACATTTTCAATTTCTTGGCT  
AACGATTATAATTTGATTTCGGGAAAGAAAACATGAAATGATGATTTTGGCGGAGAGAGTGGATGTAATCAAAAACATCAAGCAGTCT  
TATAGCGACTTTCTCA

>PhRXLR34\_700 PLHAL7000363

AAGGTCAAACCTTACGGCAGACATTGAGAGCCGCTTGCAAAAATTACTTCTTTCTCCTCCTCCTCGTGGGTGGGTTGGAGGTTTATACTG  
TCTGTATATATGTCAGACTGTCACGAAAAAACAATTGCTTCTCATATCTGAAATATTTCGAGCAACACAAAGAACTAAAGAGTAAAT  
GAGAGTTCAATACGCAGTACAACACTAGCTATTGCCGTCGTTGTAATGTGCGTCGACGCTAAGACCTCAATAACAAGCGCCAAGATAAT  
CAGACAGTCAATTTCTTCGTCATCAGCTCTTCCAACCTGCTGACGATAACGGCAGCACCTTTGAACTTGTCCAAAGTGACGAAGAGAG  
GTTTTGGCTAATTCATTATCCGTCGGATCTACTGATGTCAAGCAATTGGTTCATCAATTCGGTATCTAAGTTTTTCAAGATGATTCA  
TTACCCACCGAATAGCCTGTTGAAATCCTGCTTACCTCAATTCACAAGTTGGGAAAAATTGGATTTTCATTAACCTCCGTCATTCACA  
AGTTGGGATAGAATGACCGTTTACAAGTTCAATTTTGTATATGAGTATTACAAAACGACGCGTGGAAATGCGGCATCAAGAGAAATG  
TACGAAGCACTTTCTCAACAATCCGATGGTCCGTCCTTGCTTGAATATTGCTCCATAATGGACAGGACGAGCCACTCATCAAGGAC  
AGTTGCAAATCTGTGCGAAGTACGCAATTTTCGCAATGGGCTGAAGATGATAGTAAAAAGCTCGAAAACATTTTCAATTTCTTGGCT  
AACGATTATAATTTGATTTCGGGAAAGAAAACATGAAATGATGATTTTGGCGGAGAGAGTGGATGTAATCAAAAACATCAAGCAGTCT  
TATAGCGACTTTCTCA

>PhRXLR34\_730 PLHAL7300036



AAGGTCAAACCTTACGGCAGACATTGAGAGCCGCTTGCAAAAATTACTTCTTTCTCCTCCTCTCGTGGGTGGGTTGGAGGTTATACTG  
TCTGTATATATGTCAGACTGTCACGAAAAACAATTGCTTCTCATATCTGAAATATTCGAGCAACACAAAGAACTAAAGAGTAAAT  
GAGAGTTCAATACGCAGTACAACCTAGCTATTGCCGTCGTTGTAATGTGCGTCGACGCTAAGACCTCAATAACAAGCGCCAAGATAAT  
CAGACAGTCGAATTCCTTCGTCATCAGCTCTTCCAACCTGCTGACGATAACGGCAGCACCTTTGAACTTGTCCAAAGTGACGAAGAGAG  
GTTTTGGCTAATTCATTATCCGTCGGATCTACTGATGTCAAGCAATTGGTTCATCAATTCGGTATCTAAGTTTTTCAAGATGATTCA  
TTACCCACCGAATAGCCTGTTGAAATCCTGCTTACCTCAATTCACAAGTTGGGAAAAATTGGATTTTCATTAACCTCCGTCATTCACA  
AGTTGGGATAGAATGACCGTTTACAAGTTCAATTTTGTATATGAGTATTACAAAAACGACGCGTGGAAATGCGGCATCAAGAGAAATG  
TACGAAGCACTTTCTCAACAATCCGATGGTCCGTCCTTGTCTGCAATATTTGCTCCATAATGGACAGGACGAGCCACTCATCAAGGAC  
AGTTGCAAATCTGTGCAACTAGCGCAATTTTCGCAATGGGCTGAAGATGATAGTAAAAAGCTCGAAAAACATTTTCAATTTCTTGGCT  
AACGATTATAATTTGATTCGGGAAAGAAAACATGAAATGATGATTTTGGCGGAGAGAGTGATGTAATCAAAAACATCAAGCAGTCT  
TATAGCGACTTTCTCA

>PhRXLR35\_100 PLHAL100A10499

CTTGATAAATTTGCTTTGAAGAGCTCAAGTACATCCACAGACGTCATTCCGTTGCAGGTTTACAGACTCAGTAAAATGCGCCTTGCCT  
TCTTTTTTTCATTATGGCTTCAACTACATCTCTTCTCGTGAATAGCGTTGCAATTTCTACTGCCGGTGCAGGTAAAGTCATGACCAAAA  
ATAAGGACTCGTCGACCAGAAAAGGTCAAATCGAATATACTGAAAAGCTTCTCCGTTGGAGCTGGAAGTCTCAGCGCGAGGAAGAAC  
GTTCTACTAATAATGTCAAATTCCTGCTTCTCTCACGAATGAAATCGCGAAAACCTCAAGTTTCTTCATCAAAAAGCAACGAATCCTG  
TGGTGAACCAGGTATAGTGGCACCTTCAAAGCGGTTCCAAACAAAGCGAATCGTCTCGTATTCAATATACTGTTAGAAGGTATCG  
ATTTCAAGCGT

>PhRXLR35\_334 PLHAL3340491

CTTGATAAATTTGCTTTGAAGAGCTCAAGTACATCCACAGACGTCATTCCGTTGCAGGTTTACAGACTCAGTAAAATGCGCCTTGCCT  
TCTTTTTTTCATTATGGCTTCAACTACATCTCTTCTCGTGAATAGCGTTGCAATTTCTACTGCCGGTGCAGGTAAAGTCATGACCAAAA  
ATAAGGACTCGTCGACCAGAAAAGGTCAAATCGAATATACTAAAAAGCTTCTCCGTTGGAGCTGGAAGTCTCAGCGCGAGGAAGAAC  
GTTCTACTAATAATGTCAAATTCCTGCTTCTCTCACGAATGAAATCGCGAAAACCTCAAGTTTCTTCATCAAAAAGCAACGAATCCTG  
TGGTGAACCAGGTATAGTGGCACCTTCAAAGCGGTTCCAAACAAAGCGAATCATCTCGTATTCAATATACTGTTAGAAGGTATCG  
ATTTCAAGCGT

>PhRXLR35\_703 PLHAL7030571

CTTGATAAATTTGCTTTGAAGAGCTCAAGTACATCCACAGACGTCATTCCGTTGCAGGTTTACAGACTCAGTAAAATGCGCCTTGCCT  
TCTTTTTTTCATTATGGCTTCAACTACATCTCTTCTCGTGAATAGCGTTGCAATTTCTACTGCCGGTGCAGGTAAAGTCATGACCAAAA  
ATAAGGACTCGTCGACCAGAAAAGGTCAAATCGAATATACTGAAAAGCTTCTCCGTTGGAGCTGGAAGTCTCAGCGCGAGGAAGAAC  
GTTCTACTAATAATGTCAAATTCCTGCTTCTCTCACGAATGAAATCGCGAAAACCTCAAGTTTCTTCATCAAAAAGCAACGAATCCTG  
TGGTGAACCAGGTATAGTGGCACCTTCAAAGCGGTTCCAAACAAAGCGAATCATCTCGTATTCAATATACTGTTAGAAGGTATCG  
ATTTCAAGCGT

>PhRXLR35\_710 PLHAL7100194

CTTGATAAATTTGCTTTGAAGAGCTCAAGTACATCCACAGACGTCATTCCGTTGCAGGTTTACAGACTCAGTAAAATGCGCCTTGCCT  
TCTTTTTTTCATTATGGCTTCAACTACATCTCTTCTCGTGAATAGCGTTGCAATTTCTACTGCCGGTGCAGGTAAAGTCATGACCAAAA  
ATAAGGACTCGTCGACCAGAAAAGGTCAAATCGAATATACTAAAAAGCTTCTCCGTTGGAGCTGGAAGTCTCAGCGCGAGGAAGAAC  
GTTCTACTAATAATGTCAAATTCCTGCTTCTCTCACGAATGAAATCGCGAAAACCTCAAGTTTCTTCATCAAAAAGCAACGAATCCTG  
TGGTGAACCAGGTATAGTGGCACCTTCAAAGCGGTTCCAAACAAAGCGAATCATCTCGTATTCAATATACTGTTAGAAGGTATCG  
ATTTCAAGCGT

>PhRXLR35\_304 PLHAL3040530

CTTGATAAATTTGCTTTGAAGAGCTCAAGTACATCCACAGACGTCATTCCGTTGCAGGTTTACAGACTCAGTAAAATGCGCCTTGCCT  
TCTTTTTTTCATTATGGCTTCAACTACATCTCTTCTCGTGAATAGCGTTGCAATTTCTACTGCCGGTGCAGGTAAAGTCATGACCAAAA  
ATAAGGACTCGTCGACCAGAAAAGGTCAAATCGAATATACTGAAAAGCTTCTCCGTTGGAGCTGGAAGTCTCAGCGCGAGGAAGAAC  
GTTCTACTAATAATGTCAAATTCCTGCTTCTCTCACGAATGAAATCGCGAAAACCTCAAGTTTCTTCATCAAAAAGCAACGAATCCTG  
TGGTGAACCAGGTATAGTGGCACCTTCAAAGCGGTTCCAAACAAAGCGAATCGTCTCGTATTCAATATACTGTTAGAAGGTATCG  
ATTTCAAGCGT

>PhRXLR35\_700 PLHAL7000693

CTTGATAAATTTGCTTTGAAGAGCTCAAGTACATCCACAGACGTCATTCCGTTGCAGGTTTACAGACTCAGTAAAATGCGCCTTGCCT  
TCTTTTTTTCATTATGGCTTCAACTACATCTCTTCTCGTGAATAGCGTTGCAATTTCTACTGCCGGTGCAGGTAAAGTCATGACCAAAA  
ATAAGGACTCGTCGACCAGAAAAGGTCAAATCGAATATACTGAAAAGCTTCTCCGTTGGAGCTGGAAGTCTCAGCGCGAGGAAGAAC  
GTTCTACTAATAATGTCAAATTCCTGCTTCTCTCACGAATGAAATCGCGAAAACCTCAAGTTTCTTCATCAAAAAGCAACGAATCCTG  
TGGTGAACCAGGTATAGTGGCACCTTCAAAGCGGTTCCAAACAAAGCGAATCGTCTCGTATTCAATATACTGTTAGAAGGTATCG  
ATTTCAAGCGT

>PhRXLR35\_730 PLHAL7300137

CTTGATAAATTTGCTTTGAAGAGCTCAAGTACATCCACAGACGTCATTCCGTTGCAGGTTTACAGACTCAGTAAAATGCGCCTTGCCT  
TCTTTTTTTCATTATGGCTTCAACTACATCTCTTCTCGTGAATAGCGTTGCAATTTCTACTGCCGGTGCAGGTAAAGTCATGACCAAAA  
ATAAGGACTCGTCGACCAGAAAAGGTCAAATCGAATATACTGAAAAGCTTCTCCGTTGGAGCTGGAAGTCTCAGCGCGAGGAAGAAC  
GTTCTACTAATAATGTCAAATTCCTGCTTCTCTCACGAATGAAATCGCGAAAACCTCAAGTTTCTTCATCAAAAAGCAACGAATCCTG  
TGGTGAACCAGGTATAGTGGCACCTTCAAAGCGGTTCCAAACAAAGCGAATCGTCTCGTATTCAATATACTGTTAGAAGGTATCG  
ATTTCAAGCGT

>PhRXLR36\_100 PLHAL100A11143

GTTCTAGTTTTTCATCAATGTGCCGTGCATTCGACTTAGCCACTACCCTCTTCATCGTAATCAGTCCCTGTGCAGCTGCTGATTTTTCGA  
GCAGATCAAACCTTTTGTGCGCAAGCCCATGACATCTTACCAAACGGTGTTACTGACACGAAGCCGTCACCAAGAAGGTATCTTAA  
ACGGAGCGATGATGACGTGTCTCCCGCAACGGCTGAGGAAGAGCGCGTTGTCATTCATGATCTCCTTGATGAGGCAGGTCAAAAAGC  
CCTTTTGGCGTACGAACATTTCAACACAAAACAGCATTGATGACTCAACCTAGGTGATCATGAAAAGGAAGACGTGGCCTCTTTTCGC



>PhRXLR41\_100 PLHAL100A12976

AAAAAGTCAATCAAGTTTCGAAATCTTTTCAACTCATGCGAGGTGCATTTTACGTGGCCAATGCTATCCTCATCGCGAGTAGCATTTCG  
CACAGCTGCTGAATCTGTCCAGATCAAGTCTGATATAACGCAATACCATGACAAGTTGCCAGTCAGTGATTCTGACACAAAGACGTT  
GCCCAGAAGATCTCTTAGAGGGAGCGGAGATCAACTGGAATCTCCAGTGGCTGGAGAAGAGCGCGTCACTTCACCTGGAGTGCTCAA  
GGGTGCAGGGAACGATGTGTCTGAGGCAATCTTGTGGTTAAATAAAATTC AAGATGAAA

>PhRXLR41\_334 PLHAL3343099

AAAAAGTCAATCAAGTTTCGAAATCTTTTCAACTCATGCGAGGTGCATTTTACGTGGCCAATGCTATCCTCATCGCGAGTAGCATTTCG  
CACAGCTGCTGAATCTGTCCAGATCAAGTCTGATATAACGCAATACCATGACAAGTTGCCAGTCAGTGATTCTGACACAAAGACGTT  
GCCCAGAAGATCTCTTAGAGGGAGCGGAGATCAACTGGAATCTCCAGTGGCTGGAGAAGAGCGCGTCACTTCACCTGGAGTGCTCAA  
GGGTGCAGGGAACGATGTGTCTGAGGCAATCTTGTGGTTAAATAAAATTC AAGATGAAA

>PhRXLR41\_304 PLHAL3042961

AAAAAGTCAATCAAGTTTCGAAATCTTTTCAACTCATGCGAGGTGCATTTTACGTGGCCAATGCTATCCTCATCGCGAGTAGCATTTCG  
CACAGCTGCTGAATCTGTCCAGATCAAGTCTGATATAACGCAATACCATGACAAGTTGCCAGTCAGTGATTCTGACACAAAGACGTT  
GCCCAGAAGATCTCTTAGAGGGAGCGGAGATCAACTGGAATCTCCAGTGGCTGGAGAAGAGCGCGTCACTTCACCTGGAGTGCTCAA  
GGGTGCAGGGAACGATGTGTCTGAGGCAATCTTGTGGTTAAATAAAATTC AAGATGAAA

>PhRXLR42\_100 PLHAL100A10212

TCGTCAGGATACATATCTTAAAATTC AAGTCAGTTCTTTGTCTCACTCTCTTCCTCATGCGCGGTGCAATCTACGTGACTACTTCT  
CTCCTCATCGCAACAAGCGTCCACACAGCTGCTGAATCCCTTCAGATCAAGTCACGAAATGTACGAAAGCATGACATCTTGCCAATT  
GGTGGTATGGACACCAAGACGTTACCCAAAATGTCGTTGAAAGAAAGCAATGACCGAGTGGTGCACACCACAGCTGATGAAGAGCGC  
AACAGTTTGTAGCTAGATTGATTGCCAAGACACGTTGGTGAAGCATTAAAATTAATGTTGCCGAAAACATTGGCAAACGAGAAGGATAAA  
GCGATCGTCAAAGTCAGTGCGGATGACTTAAGCAAGATGATTATGAAAAACTTGGGCTCTCCTGCCGCTTCAAGGAAAAAAAAGAA  
ATCCAAGATCTTGAAGAAGAAGATGGCCAACTCATCGAAGATTTGGCTATCTCGATACCGTGTATACTGCGCGCCGTCAAATAGCC  
GATGCAACTCGCCAATTTTCCCTGAACAAAAGTAATGAAGCCAAAAAACTGATCAAG

>PhRXLR42\_334 PLHAL3340207

TCGTCAGGATACATATCTTAAAATTC AAGTCAGTTCTTTGTCTCACTCTCTTCCTCATGCGCGGTGCAATCTACGTGACTACTTCT  
CTCCTCATCGCAACAAGCGTCCACACAGCTGCTGAATCCCTTCAGATCAAGTCACGAAATGTACGAAAGCATGACATCTTGCCAATT  
GGTGGTATGGACACCAAGACGTTACCCAAAATGTCGTTGAAAGAAAGCAATGACCGAGTGGTGCACACCACAGCTGATGAAGAGCGC  
AACAGTTTGTAGCTAGATTGATTGCCAAGACACGTTGGTGAAGCATTAAAATTAATGTTGCCGAAAACATTGGCAAACGAGAAGGATAAA  
GCGATCGTCAAAGTCAGTGCGGATGACTTAAGCAAGATGATTATGAAAAACTTGGGCTCTCCTGCCGCTTCAAGGAAAAAAAAGAA  
ATCCAAGATCTTGAAGAAGAAGATGGCCAACTCATCGAAGATTTGGCTATCTCGATACCGTGTATACTGCGCGCCGTCAAATAGCC  
GATGCAACTCGCCAATTTTCCCTGAACAAAAGTAATGAAGCCAAAAAACTGATCAAG

>PhRXLR42\_703 PLHAL7030246

TCGTCAGGATACATATCTTAAAATTC AAGTCAGTTCTTTGTCTCACTCTCTTCCTCATGCGCGGTGCAATCTACGTGACTACTTCT  
CTCCTCATCGCAACAAGCGTCCACACAGCTGCTGAATCCCTTCAGATCAAGTCACGAAATGTACGAAAGCATGACATCTTGCCAATT  
GGTGGTATGGACACCAAGACGTTACCCAAAATGTCGTTGAAAGAAAGCAATGACCGAGTGGTGCACACCACAGCTGATGAAGAGCGC  
AACAGTTTGTAGCTAGATTGATTGCCAAGACACGTTGGTGAAGCATTAAAATTAATGTTGCCGAAAACATTGGCAAACGAGAAGGATAAA  
GCGATCGTCAAAGTCAGTGCGGATGACTTAAGCAAGATGATTATGAAAAACTTGGGCTCTCCTGCCGCTTCAAGGAAAAAAAAGAA  
ATCCAAGATCTTGAAGAAGAAGATGGCCAACTCATCGAAGATTTGGCTATCTCGATACCGTGTATACTGCGCGCCGTCAAATAGCC  
GATGCAACTCGCCAATTTTCCCTGAACAAAAGTAATGAAGCCAAAAAACTGATCAAG

>PhRXLR42\_710 PLHAL7100279

TCGTCAGGATACATATCTTAAAATTC AAGTCAGTTCTTTGTCTCACTCTCTTCCTCATGCGCGGTGCAATCTACGTGACTACTTCT  
CTCCTCATCGCAACAAGCGTCCACACAGCTGCTGAATCCCTTCAGATCAAGTCACGAAATGTACGAAAGCATGACATCTTGCCAATT  
GGTGGTATGGACACCAAGACGTTACCCAAAATGTCGTTGAAAGAAAGCAATGACCGAGTGGTGCACACCACAGCTGATGAAGAGCGC  
AACAGTTTGTAGCTAGATTGATTGCCAAGACACGTTGGTGAAGCATTAAAATTAATGTTGCCGAAAACATTGGCAAACGAGAAGGATAAA  
GCGATCGTCAAAGTCAGTGCGGATGACTTAAGCAAGATGATTATGAAAAACTTGGGCTCTCCTGCCGCTTCAAGGAAAAAAAAGAA  
ATCCAAGATCTTGAAGAAGAAGATGGCCAACTCATCGAAGATTTGGCTATCTCGATACCGTGTATACTGCGCGCCGTCAAATAGCC  
GATGCAACTCGCCAATTTTCCCTGAACAAAAGTAATGAAGCCAAAAAACTGATCAAG

>PhRXLR42\_304 PLHAL3040563

TCGTCAGGATACATATCTTAAAATTC AAGTCAGTTCTTTGTCTCACTCTCTTCCTCATGCGCGGTGCAATCTACGTGACTACTTCT  
CTCCTCATCGCAACAAGCGTCCACACAGCTGCTGAATCCCTTCAGATCAAGTCACGAAATGTACGAAAGCATGACATCTTGCCAATT  
GGTGGTATGGACACCAAGACGTTACCCAAAATGTCGTTGAAAGAAAGCAATGACCGAGTGGTGCACACCACAGCTGATGAAGAGCGC  
AACAGTTTGTAGCTAGATTGATTGCCAAGACACGTTGGTGAAGCATTAAAATTAATGTTGCCGAAAACATTGGCAAACGAGAAGGATAAA  
GCGATCGTCAAAGTCAGTGCGGATGACTTAAGCAAGATGATTATGAAAAACTTGGGCTCTCCTGCCGCTTCAAGGAAAAAAAAGAA  
ATCCAAGATCTTGAAGAAGAAGATGGCCAACTCATCGAAGATTTGGCTATCTCGATACCGTGTATACTGCGCGCCGTCAAATAGCC  
GATGCAACTCGCCAATTTTCCCTGAACAAAAGTAATGAAGCCAAAAAACTGATCAAG

>PhRXLR42\_700 PLHAL7000188

TCGTCAGGATACATATCTTAAAATTC AAGTCAGTTCTTTGTCTCACTCTCTTCCTCATGCGCGGTGCAATCTACGTGACTACTTCT  
CTCCTCATCGCAACAAGCGTCCACACAGCTGCTGAATCCCTTCAGATCAAGTCACGAAATGTACGAAAGCATGACATCTTGCCAATT  
GGTGGTATGGACACCAAGACGTTACCCAAAATGTCGTTGAAAGAAAGCAATGACCGAGTGGTGCACACCACAGCTGATGAAGAGCGC  
AACAGTTTGTAGCTAGATTGATTGCCAAGACACGTTGGTGAAGCATTAAAATTAATGTTGCCGAAAACATTGGCAAACGAGAAGGATAAA  
GCGATCGTCAAAGTCAGTGCGGATGACTTAAGCAAGATGATTATGAAAAACTTGGGCTCTCCTGCCGCTTCAAGGAAAAAAAAGAA  
ATCCAAGATCTTGAAGAAGAAGATGGCCAACTCATCGAAGATTTGGCTATCTCGATACCGTGTATACTGCGCGCCGTCAAATAGCC  
GATGCAACTCGCCAATTTTCCCTGAACAAAAGTAATGAAGCCAAAAAACTGATCAAG

>PhRXLR42\_730 PLHAL7300227

TCGTCAGGATACATATCTTAAAATTC AAGTCAGTTCTTTGTCTCACTCTCTTCCTCATGCGCGGTGCAATCTACGTGACTACTTCT  
CTCCTCATCGCAACAAGCGTCCACACAGCTGCTGAATCCCTTCAGATCAAGTCACGAAATGTACGAAAGCATGACATCTTGCCAATT

GGTGGTATGGACACCAAGACGTTACCCAAAATGTCGTTGAAAGAAAGCAATGACCGAGTGGTGCACACCACAGCTGATGAAGAGCGC  
AACAGTTTGTAGCTAGATTGATTGCCAAGACACGTGGTGAAGCATTAAAAATTAATGTTGCCGAAAACATTGGCAAACGAGAAGGATAAA  
GCGATCGTCAAAGTCAGTGC GGATGACTTAAGCAAGATGATTATGAAAACTTGGGCTCTCCTGCCGCTTCAAGGAAAAAAGAA  
ATCCAAGATCTTGAAGAAGAAGATGGCCAACTCATCGAAGATTTGGCTTATCTCGATACCGTGTATACTGCGCGCCGTCAAATAGCC  
GATGCAACTCGCCAATTTTCCCTGAACAAAAGTAATGAAGCCAAAAAATGATCAAG

>PhRXLR43\_100 PLHAL100A11758

GGGATGTACGACACTAGCTCTACGCTGCATTATAATACATGTAAACTATGATTATGCACACAAGGGAACGATAGAAACAGCAACGTG  
AAGGTAAAGTATCTCAGTAATTAATCAGTTCATTTCTCATTTCCTCGTAACTACACTAGCGCCTCTTCAAGACCCCCGATGCTGCT  
CCGCTCATTCTACTCATTGTGCGGCTACGCTGTTTGTGGTCTCAGCGAAGTTTCAAGTTCAAGTCATACCAATTCATCGGATTC  
AAAGGGTACTGCTTCATTGAACAGCCAATCTACTCCAACACTGACAACATCATCTACTCTGATGAGGAAGAGAGGCATGTAGTCGTACC  
AACAGCTGTGCCTCGAAACTGAGAGACGATTTAAATAAGGCTCTAAACAAAATTTCCAGCATCTTGAAGCGCGATGCCACCACCCT  
ACCCGAGAATGTTGGGCCAAAGACAAATAATCCCCTTACAAATGCGTTTACTCCACAAAAATCGACACCAAATCACCAAGTGGATCC  
AAGTGTGGTACCAACGATAAGTTTGTAGCTCAGAAGATGAGGATCAA

>PhRXLR43\_334 PLHAL3341852

GGGATGTACGACACTAGCTCTACGCTGCATTATAATACATGTAAACTATGATTATGCACACAAGGGAACGATAGAAACAGCAACGTG  
AAGGTAAAGTATCTCAGTAATTAATCAGTTCATTTCTCATTTCCTCGTAACTACACTAGCGCCTCTTCAAGACCCCCGATGCTGCT  
CCGCTCATTCTACTCATTGTGCGGCTACGCTGTTTGTGGTCTCAGCGAAGTTTCAAGTTCAAGTCATACCAATTCATCGGATTC  
AAAGGGTACTGCTTCATTGAACAGCCAATCTACTCCAACACTGACAACATCATCTACTCTGATGAGGAAGAGAGGCATGTAGTCGTACC  
AACAGCTGTGCCTCGAAACTGAGAGACGATTTAAATAAGGCTCTAAACAAAATTTCCAGCATCTTGAAGCGCGATGCCACCACCCT  
ACCCGAGAATGTTGGGCCAAAGACAAATAATCCCCTTACAAATGCGTTTACTCCACAAAAATCGACACCAAATCACCAAGTGGATCC  
AAGTGTGGTACCAACGATAAGTTTGTAGCTCAGAAGATGAGGATCAA

>PhRXLR43\_703 PLHAL7031622

GGGATGTACGACACTAGCTCTACGCTGCATTATAATACATGTAAACTATGATTATGCACACAAGGGAACGATAGAAACAGCAACGTG  
AAGGTAAAGTATCTCAGTAATTAATCAGTTCATTTCTCATTTCCTCGTAACTACACTAGCGCCTCTTCAAGACCCCCGATGCTGCT  
CCGCTCATTCTACTCATTGTGCGGCTACGCTGTTTGTGGTCTCAGCGAAGTTTCAAGTTCAAGTCATACCAATTCATCGGATTC  
AAAGGGTACTGCTTCATTGAACAGCCAATCTACTCCAACACTGACAACATCATCTACTCTGATGAGGAAGAGAGGCATGTAGTCGTACC  
AACAGCTGTGCCTCGAAACTGAGAGACGATTTAAATAAGGCTCTAAACAAAATTTCCAGCATCTTGAAGCGCGATGCCACCACCCT  
ACCCGAGAATGTTGGGCCAAAGACAAATAATCCCCTTACAAATGCGTTTACTCCACAAAAATCGACACCAAATCACCAAGTGGATCC  
AAGTGTGGTACCAACGATAAGTTTGTAGCTCAGAAGATGAGGATCAA

>PhRXLR43\_710 PLHAL7101446

GGGATGTACGACACTAGCTCTACGCTGCATTATAATACATGTAAACTATGATTATGCACACAAGGGAACGATAGAAACAGCAACGTG  
AAGGTAAAGTATCTCAGTAATTAATCAGTTCATTTCTCATTTCCTCGTAACTACACTAGCGCCTCTTCAAGACCCCCGATGCTGCT  
CCGCTCATTCTACTCATTGTGCGGCTACGCTGTTTGTGGTCTCAGCGAAGTTTCAAGTTCAAGTCATACCAATTCATCGGATTC  
AAAGGGTACTGCTTCATTGAACAGCCAATCTACTCCAACACTGACAACATCATCTACTCTGATGAGGAAGAGAGGCATGTAGTCGTACC  
AACAGCTGTGCCTCGAAACTGAGAGACGATTTAAATAAGGCTCTAAACAAAATTTCCAGCATCTTGAAGCGCGATGCCACCACCCT  
ACCCGAGAATGTTGGGCCAAAGACAAATAATCCCCTTACAAATGCGTTTACTCCACAAAAATCGACACCAAATCACCAAGTGGATCC  
AAGTGTGGTACCAACGATAAGTTTGTAGCTCAGAAGATGAGGATCAA

>PhRXLR43\_304 PLHAL3041750

GGGATGTACGACACTAGCTCTACGCTGCATTATAATACATGTAAACTATGATTATGCACACAAGGGAACGATAGAAACAGCAACGTG  
AAGGTAAAGTATCTCAGTAATTAATCAGTTCATTTCTCATTTCCTCGTAACTACACTAGCGCCTCTTCAAGACCCCCGATGCTGCT  
CCGCTCATTCTACTCATTGTGCGGCTACGCTGTTTGTGGTCTCAGCGAAGTTTCAAGTTCAAGTCATACCAATTCATCGGATTC  
AAAGGGTACTGCTTCATTGAACAGCCAATCTACTCCAACACTGACAACATCATCTACTCTGATGAGGAAGAGAGGCATGTAGTCGTACC  
AACAGCTGTGCCTCGAAACTGAGAGACGATTTAAATAAGGCTCTAAACAAAATTTCCAGCATCTTGAAGCGCGATGCCACCACCCT  
ACCCGAGAATGTTGGGCCAAAGACAAATAATCCCCTTACAAATGCGTTTACTCCACAAAAATCGACACCAAATCACCAAGTGGATCC  
AAGTGTGGTACCAACGATAAGTTTGTAGCTCAGAAGATGAGGATCAA

>PhRXLR43\_700 PLHAL7002047

GGGATGTACGACACTAGCTCTACGCTGCATTATAATACATGTAAACTATGATTATGCACACAAGGGAACGATAGAAACAGCAACGTG  
AAGGTAAAGTATCTCAGTAATTAATCAGTTCATTTCTCATTTCCTCGTAACTACACTAGCGCCTCTTCAAGACCCCCGATGCTGCT  
CCGCTCATTCTACTCATTGTGCGGCTACGCTGTTTGTGGTCTCAGCGAAGTTTCAAGTTCAAGTCATACCAATTCATCGGATTC  
AAAGGGTACTGCTTCATTGAACAGCCAATCTACTCCAACACTGACAACATCATCTACTCTGATGAGGAAGAGAGGCATGTAGTCGTACC  
AACAGCTGTGCCTCGAAACTGAGAGACGATTTAAATAAGGCTCTAAACAAAATTTCCAGCATCTTGAAGCGCGATGCCACCACCCT  
ACCCGAGAATGTTGGGCCAAAGACAAATAATCCCCTTACAAATGCGTTTACTCCACAAAAATCGACACCAAATCACCAAGTGGATCC  
AAGTGTGGTACCAACGATAAGTTTGTAGCTCAGAAGATGAGGATCAA

>PhRXLR43\_730 PLHAL7301706

GGGATGTACGACACTAGCTCTACGCTGCATTATAATACATGTAAACTATGATTATGCACACAAGGGAACGATAGAAACAGCAACGTG  
AAGGTAAAGTATCTCAGTAATTAATCAGTTCATTTCTCATTTCCTCGTAACTACACTAGCGCCTCTTCAAGACCCCCGATGCTGCT  
CCGCTCATTCTACTCATTGTGCGGCTACGCTGTTTGTGGTCTCAGCGAAGTTTCAAGTTCAAGTCATACCAATTCATCGGATTC  
AAAGGGTACTGCTTCATTGAACAGCCAATCTACTCCAACACTGACAACATCATCTACTCTGATGAGGAAGAGAGGCATGTAGTCGTACC  
AACAGCTGTGCCTCGAAACTGAGAGACGATTTAAATAAGGCTCTAAACAAAATTTCCAGCATCTTGAAGCGCGATGCCACCACCCT  
ACCCGAGAATGTTGGGCCAAAGACAAATAATCCCCTTACAAATGCGTTTACTCCACAAAAATCGACACCAAATCACCAAGTGGATCC  
AAGTGTGGTACCAACGATAAGTTTGTAGCTCAGAAGATGAGGATCAA

>PhRXLR44\_100 PLHAL100A10434

ACAATCGAACATTTCGTCAAACTTAGCAAAACACCAATTGAGACTTTTGGACAGAATCAATCAATTCGTCATGCGACACCAACCGTTTCT  
GGCCACGCTGCTTGTACTATCACTCTACACGCAAGCGGAATTCATCCCTTGCTGCTAATGTGGCGTCTTCGGGCGTTCCATTGGA  
GCGTCTCTGTCTAAACTGGTTGGTACAGTTGATAAAGAGGCATTTAAAAAGCTGGGGACGCTGCTGAATTAATGGAGACTGAAGAAAG

AACGAGGACTTTTGGAACATTCTTTGCTAATGCAAAACAGGCCAAAAATGTCAAAATTACAGCTGGCGGTGCGACATCAACAGGCGT  
GAATATCGAAAAAGTGCAAGCAGCCGTGAAAAACTTCGAAGCTCCAAAAAG  
>PhRXLR44\_334 PLHAL3341719  
ACAATCGAACATTTCGTCAAACCTTAGCAAACACCAATTGAGACTTTTGACAGAATCAATCAATTCGTTCATGCGACACCAACCGTTTCT  
GGCCACGCTGCTTGTACTATCACTCTACACGCAAGCGGAATTCATCCCTTGCTGCTAATGTGGCGTCTTCGGGCGTTCCATTGGA  
GCGTCTCTGTCTAAACTGGTTGGTACAGTTGATAAGAGGCATTTAAAAGCTGGGGACGCTGCTGAATTAATGGAGACTGAAGAAAG  
AACGAGGACTTTTGGAACATTCTTTGCTAATGCAAAACAGGCCAAAAATGTCAAAATTACAGCTGGCGGTGCGACATCAACAGGCGT  
GAATATCGAAAAAGTGCAAGCAGCCGTGAAAAACTTCGAAGCTCCAAAAAG  
>PhRXLR44\_703 PLHAL7031329  
ACAATCGAACATTTCGTCAAACCTTAGCAAACACCAATTGAGACTTTTGACAGAATCAATCAATTCGTTCATGCGACACCAACCGTTTCT  
GGCCACGCTGCTTGTACTATCACTCTACACGCAAGCGGAATTCATCCCTTGCTGCTAATGTGGCGTCTTCGGGCGTTCCATTGGA  
GCGTCTCTGTCTAAACTGGTTGGTACAGTTGATAAGAGGCATTTAAAAGCTGGGGACGCTGCTGAATTAATGGAGACTGAAGAAAG  
AACGAGGACTTTTGGAACATTCTTTGCTAATGCAAAACAGGCCAAAAATGTCAAAATTACAGCTGGCGGTGCGACATCAACAGGCGT  
GAATATCGAAAAAGTGCAAGCAGCCGTGAAAAACTTCGAAGCTCCAAAAAG  
>PhRXLR44\_710 PLHAL7100495  
ACAATCGAACATTTCGTCAAACCTTAGCAAACACCAATTGAGACTTTTGACAGAATCAATCAATTCGTTCATGCGACACCAACCGTTTCT  
GGCCACGCTGCTTGTACTATCACTCTACACGCAAGCGGAATTCATCCCTTGCTGCTAATGTGGCGTCTTCGGGCGTTCCATTGGA  
GCGTCTCTGTCTAAACTGGTTGGTACAGTTGATAAGAGGCATTTAAAAGCTGGGGACGCTGCTGAATTAATGGAGACTGAAGAAAG  
AACGAGGACTTTTGGAACATTCTTTGCTAATGCAAAACAGGCCAAAAATGTCAAAATTACAGCTGGCGGTGCGACATCAACAGGCGT  
GAATATCGAAAAAGTGCAAGCAGCCGTGAAAAACTTCGAAGCTCCAAAAAG  
>PhRXLR44\_304 PLHAL3040445  
ACAATCGAACATTTCGTCAAACCTTAGCAAACACCAATTGAGACTTTTGACAGAATCAATCAATTCGTTCATGCGACACCAACCGTTTCT  
GGCCACGCTGCTTGTACTATCACTCTACACGCAAGCGGAATTCATCCCTTGCTGCTAATGTGGCGTCTTCGGGCGTTCCATTGGA  
GCGTCTCTGTCTAAACTGGTTGGTACAGTTGATAAGAGGCATTTAAAAGCTGGGGACGCTGCTGAATTAATGGAGACTGAAGAAAG  
AACGAGGACTTTTGGAACATTCTTTGCTAATGCAAAACAGGCCAAAAATGTCAAAATTACAGCTGGCGGTGCGACATCAACAGGCGT  
GAATATCGAAAAAGTGCAAGCAGCCGTGAAAAACTTCGAAGCTCCAAAAAG  
>PhRXLR44\_700 PLHAL7001666  
ACAATCGAACATTTCGTCAAACCTTAGCAAACACCAATTGAGACTTTTGACAGAATCAATCAATTCGTTCATGCGACACCAACCGTTTCT  
GGCCACGCTGCTTGTACTATCACTCTACACGCAAGCGGAATTCATCCCTTGCTGCTAATGTGGCGTCTTCGGGCGTTCCATTGGA  
GCGTCTCTGTCTAAACTGGTTGGTACAGTTGATAAGAGGCATTTAAAAGCTGGGGACGCTGCTGAATTAATGGAGACTGAAGAAAG  
AACGAGGACTTTTGGAACATTCTTTGCTAATGCAAAACAGGCCAAAAATGTCAAAATTACAGCTGGCGGTGCGACATCAACAGGCGT  
GAATATCGAAAAAGTGCAAGCAGCCGTGAAAAACTTCGAAGCTCCAAAAAG  
>PhRXLR44\_730 PLHAL7300700  
ACAATCGAACATTTCGTCAAACCTTAGCAAACACCAATTGAGACTTTTGACAGAATCAATCAATTCGTTCATGCGACACCAACCGTTTCT  
GGCCACGCTGCTTGTACTATCACTCTACACGCAAGCGGAATTCATCCCTTGCTGCTAATGTGGCGTCTTCGGGCGTTCCATTGGA  
GCGTCTCTGTCTAAACTGGTTGGTACAGTTGATAAGAGGCATTTAAAAGCTGGGGACGCTGCTGAATTAATGGAGACTGAAGAAAG  
AACGAGGACTTTTGGAACATTCTTTGCTAATGCAAAACAGGCCAAAAATGTCAAAATTACAGCTGGCGGTGCGACATCAACAGGCGT  
GAATATCGAAAAAGTGCAAGCAGCCGTGAAAAACTTCGAAGCTCCAAAAAG  
>PhRXLR48\_100 PLHAL100A10739  
CACTCTCACGAATGTATAGACAAACCCTCAAATCATTCACTCTTCAAATTACCAAGCGGCTGTCCATTTCTTGAGCAGAAAACAAAA  
TAGGAGTGATCATGCTCAGACGTAGCGCTCTCATATTGGCAGTGGCGACTATGGCAACTATAGGCAGCGGTTTCAGCTCGAGTCTCTG  
ATACCACATCGACATCTTCGGCCTATTTGATGACGACAAATCCTACAGCCACTGAAGGCAATCGACTACTTCGTGGTGCAAGTGCGA  
ATGACGCCAGTAAAGTTCCAGTCTATCATTATCCACCTGAACAAGATGAAAGGAGCAAGAAAGCACCTTTTATCGAGGATCGACTGA  
ATGAAGAGTTGACGAACCCTGAGTACGTTAATCGGCTTTACGAACGATGGTATTCGGAGGGCTTATCGTCAAATGAAGTCGCTTTAG  
GTCTGGATCAGATCGATAACCAAGAGGTCCAAGAGACTTATCAAACCTCGGATTGGGCTATAGAGAGTATATTGATTGGAGGAACA  
GTATGTAGTTAGGT  
>PhRXLR48\_334 PLHAL3340729  
CACTCTCACGAATGTATAGACAAACCCTCAAATCATTCACTCTTCAAATTACCAAGCGGCTGTCCATTTCTTGAGCAGAAAACAAAA  
TAGGAGTGATCATGCTCAGACGTAGCGCTCTCATATTGGCAGTGGCGACTATGGCAACTATAGGCAGCGGTTTCAGCTCGAGTCTCTG  
ATACCACATCGACATCTTCGGCCTATTTGATGACGACAAATCCTACAGCCACTGAAGGCAATCGACTACTTCGTGGTGCAAGTGCGA  
ATGACGCCAGTAAAGTTCCAGTCTATCATTATCCACCTGAACAAGATGAAAGGAGCAAGAAAGCACCTTTTATCGAGGATCGACTGA  
ATGAAGAGTTGACGAACCCTGAGTACGTTAATCGGCTTTACGAACGATGGTATTCGGAGGGCTTATCGTCAAATGAAGTCGCTTTAG  
GTCTGGATCAGATCGATAACCAAGAGGTCCAAGAGACTTATCAAACCTCGGATTGGGCTATAGAGAGTATATTGATTGGAGGAACA  
GTATGTAGTTAGGT  
>PhRXLR48\_703 PLHAL7030741 20409  
CACTCTCACGAATGTATAGACAAACCCTCAAATCATTCACTCTTCAAATTACCAAGCGGCTGTCCATTTCTTGAGCAGAAAACAAAA  
TAGGAGTGATCATGCTCAGACGTAGCGCTCTCATATTGGCAGTGGCGACTATGGCAACTATAGGCAGCGGTTTCAGCTCGAGTCTCTG  
ATACCACATCGACATCTTCGGCCTATTTGATGACGACAAATCCTACAGCCACTGAAGGCAATCGACTACTTCGTGGTGCAAGTGCGA  
ATGACGCCAGTAAAGTTCCAGTCTATCATTATCCACCTGAACAAGATGAAAGGAGCAAGAAAGCACCTTTTATCGAGGATCGACTGA  
ATGAAGAGTTGACGAACCCTGAGTACGTTAATCGGCTTTACGAACGATGGTATTCGGAGGGCTTATCGTCAAATGAAGTCGCTTTAG  
GTCTGGATCAGATCGATAACCAAGAGGTCCAAGAGACTTATCAAACCTCGGATTGGGCTATAGAGAGTATATTGATTGGAGGAACA  
GTATGTAGTTAGGT  
>PhRXLR48\_710 PLHAL7100049  
CACTCTCACGAATGTATAGACAAACCCTCAAATCATTCACTCTTCAAATTACCAAGCGGCTGTCCATTTCTTGAGCAGAAAACAAAA  
TAGGAGTGATCATGCTCAGACGTAGCGCTCTCATATTGGCAGTGGCGACTATGGCAACTATAGGCAGCGGTTTCAGCTCGAGTCTCTG  
ATACCACATCGACATCTTCGGCCTATTTGATGACGACAAATCCTACAGCCACTGAAGGCAATCGACTACTTCGTGGTGCAAGTGCGA  
ATGACGCCAGTAAAGTTCCAGTCTATCATTATCCACCTGAACAAGATGAAAGGAGCAAGAAAGCACCTTTTATCGAGGATCGACTGA  
ATGAAGAGTTGACGAACCCTGAGTACGTTAATCGGCTTTACGAACGATGGTATTCGGAGGGCTTATCGTCAAATGAAGTCGCTTTAG  
GTCTGGATCAGATCGATAACCAAGAGGTCCAAGAGACTTATCAAACCTCGGATTGGGCTATAGAGAGTATATTGATTGGAGGAACA  
GTATGTAGTTAGGT

ATGACGCCAGTAAAGTTCCAGTCTATCATTATCCACCTGAACAAGATGAAAGGAGCAAGAAAGCACCTTTTATCGAGGATCGACTGA  
ATGAAGAGTTGACGAACCCTGAGTACGTTAATCGGCTTTACGAACGATGGTATTCGGAGGGCTTATCGTCAAATGAAGTCGCTTTAG  
GTCTGGATCAGATCGATAACCAAGAGGTCCAAGAGACTTATCAAAACCTCGGATTGGGCTATAGAGAGTATATTGATTGGAGGAACA  
GTATGTAGTTAGGT

>PhRXLR48\_304 PLHAL3040734

CACTCTCACGAATGTATAGACAAACCCTCAAATCATTCACTCTTCAAATTACCAAGCGGCTGTCCATTTCTTGAGCAGAAAACAAAA  
TAGGAGTGATCATGCTCAGACGTAGCGCTCTCATATTGGCAGTGGCGACTATGGCAACTATAGGCAGCGGTTTCAGCTCGAGTCTCTG  
ATACCACATCGACATCTTCGGCCTATTTGATGACGACAAAATCCTACAGCCACTGAAGGCAATCGACTACTTCGTGGTGCAAGTGCGA  
ATGACGCCAGTAAAGTTCCAGTCTATCATTATCCACCTGAACAAGATGAAAGGAGCAAGAAAGCACCTTTTATCGAGGATCGACTGA  
ATGAAGAGTTGACGAACCCTGAGTACGTTAATCGGCTTTACGAACGATGGTATTCGGAGGGCTTATCGTCAAATGAAGTCGCTTTAG  
GTCTGGATCAGATCGATAACCAAGAGGTCCAAGAGACTTATCAAAACCTCGGATTGGGCTATAGAGAGTATATTGATTGGAGGAACA  
GTATGTAGTTAGGT

>PhRXLR48\_700 PLHAL7001611

CACTCTCACGAATGTATAGACAAACCCTCAAATCATTCACTCTTCAAATTACCAAGCGGCTGTCCATTTCTTGAGCAGAAAACAAAA  
TAGGAGTGATCATGCTCAGACGTAGCGCTCTCATATTGGCAGTGGCGACTATGGCAACTATAGGCAGCGGTTTCAGCTCGAGTCTCTG  
ATACCACATCGACATCTTCGGCCTATTTGATGACGACAAAATCCTACAGCCACTGAAGGCAATCGACTACTTCGTGGTGCAAGTGCGA  
ATGACGCCAGTAAAGTTCCAGTCTATCATTATCCACCTGAACAAGATGAAAGGAGCAAGAAAGCACCTTTTATCGAGGATCGACTGA  
ATGAAGAGTTGACGAACCCTGAGTACGTTAATCGGCTTTACGAACGATGGTATTCGGAGGGCTTATCGTCAAATGAAGTCGCTTTAG  
GTCTGGATCAGATCGATAACCAAGAGGTCCAAGAGACTTATCAAAACCTCGGATTGGGCTATAGAGAGTATATTGATTGGAGGAACA  
GTATGTAGTTAGGT

>PhRXLR48\_730 PLHAL7300750

CACTCTCACGAATGTATAGACAAACCCTCAAATCATTCACTCTTCAAATTACCAAGCGGCTGTCCATTTCTTGAGCAGAAAACAAAA  
TAGGAGTGATCATGCTCAGACGTAGCGCTCTCATATTGGCAGTGGCGACTATGGCAACTATAGGCAGCGGTTTCAGCTCGAGTCTCTG  
ATACCACATCGACATCTTCGGCCTATTTGATGACGACAAAATCCTACAGCCACTGAAGGCAATCGACTACTTCGTGGTGCAAGTGCGA  
ATGACGCCAGTAAAGTTCCAGTCTATCATTATCCACCTGAACAAGATGAAAGGAGCAAGAAAGCACCTTTTATCGAGGATCGACTGA  
ATGAAGAGTTGACGAACCCTGAGTACGTTAATCGGCTTTACGAACGATGGTATTCGGAGGGCTTATCGTCAAATGAAGTCGCTTTAG  
GTCTGGATCAGATCGATAACCAAGAGGTCCAAGAGACTTATCAAAACCTCGGATTGGGCTATAGAGAGTATATTGATTGGAGGAACA  
GTATGTAGTTAGGT

>PhRXLR49\_100 PLHAL100A10475

GAAAAGGATAGGCTGCAGGATTGCAGAAAACAATGATTTGCGAATATTTAACTATTGTAAAGCCGGCTCCAGAATTTAAGCAAGGCC  
CTAGAGGTCTCACTTATCAACTTTCTCTTCTTATCTCACTACCATCTCCTCCGCCCTACCTTCTGCAACGATGCGCCTTCTCGTACT  
ACTACCGGCTGTGATGGCATCAACTTTCTGGCGACTAGTAGTGCCGTTGTCAATCCTGACCCCATTCATCATGCCAACTCTTTACA  
AGTAGCTTCGAAAGTTAATATTGCTGCTTTAAAGAATGGTCTCTGCTCTGAGAACCCTGGAACAGTCCCAAAGGAGAGGGCGCTT  
AGGAGATACATACTATCCCAGCGCTTACTCCTATACTGGCGGGAATAATTTATGGATTCAACAACATTTCTCCCAACAGCAACGGCTA  
TCAGAACACTTACCCTACAAGATACGGCAACCAGAAGCGAGATGACAGTGTATTCAGCAGCGAAGATAGCAAAGACGATTTCTAG  
CCACGATTAGCCGCATACCTCACCCGAGTCGATCCTGATATTAATGACTGTATGAAGATGAAGGCTAGAATGACATTCGTGAGCTC  
ATCTAAGTTATCGAAGTTCTCTTGACCGAGGTACGTTTTTATAGTGTGGGATACAGACCATGTTTGAAAATATACTTAATTT

>PhRXLR49\_334 PLHAL3340459

GAAAAGGATAGGCTGCAGGATTGCAGAAAACAATGATTTGCGAATATTTAACTATTGTAAAGCCGGCTCCAGAATTTAAGCAAGGCC  
CTAGAGGTCTCACTTATCAACTTTCTCTTCTTATCTCACTACCATCTCCTCCGCCCTACCTTCTGCAACGATGCGCCTTCTCGTACT  
ACTACCGGCTGTGATGGCATCAACTTTCTGGCGACTAGTAGTGCCGTTGTCAATCCTGACCCCATTCATCATGCCAACTCTTTACA  
AGTAGCTTCGAAAGTTAATATTGCTGCTTTAAAGAATGGTCTCTGCTCTGAGAACCCTGGAACAGTCCCAAAGGAGAGGGCGCTT  
AGGAGATACATACTATCCCAGCGCTTACTCCTATACTGGCGGGAATAATTTATGGATTCAACAACATTTCTCCCAACAGCAACGGCTA  
TCAGAACACTTACCCTACAAGATACGGCAACCAGAAGCGAGATGACAGTGTATTCAGCAGCGAAGATAGCAAAGACGATTTCTAG  
CCACGATTAGCCGCATACCTCACCCGAGTCGATCCTGATATTAATGACTGTATGAAGATGAAGGCTAGAATGACATTCGTGAGCTC  
ATCTAAGTTATCGAAGTTCTCTTGACCGAGGTACGTTTTTATAGTGTGGGATACAGACCATGTTTGAAAATATACTTAATTT

>PhRXLR49\_703 PLHAL7030171

GAAAAGGATAGGCTGCAGGATTGCAGAAAACAATGATTTGCGAATATTTAACTATTGTAAAGCCGGCTCCAGAATTTAAGCAAGGCC  
CTAGAGGTCTCACTTATCAACTTTCTCTTCTTATCTCACTACCATCTCCTCCGCCCTACCTTCTGCAACGATGCGCCTTCTCGTACT  
ACTACCGGCTGTGATGGCATCAACTTTCTGGCGACTAGTAGTGCCGTTGTCAATCCTGACCCCATTCATCATGCCAACTCTTTACA  
AGTAGCTTCGAAAGTTAATATTGCTGCTTTAAAGAATGGTCTCTGCTCTGAGAACCCTGGAACAGTCCCAAAGGAGAGGGCGCTT  
AGGAGATACATACTATCCCAGCGCTTACTCCTATACTGGCGGGAATAATTTATGGATTCAACAACATTTCTCCCAACAGCAACGGCTA  
TCAGAACACTTACCCTACAAGATACGGCAACCAGAAGCGAGATGACAGTGTATTCAGCAGCGAAGATAGCAAAGACGATTTCTAG  
CCACGATTAGCCGCATACCTCACCCGAGTCGATCCTGATATTAATGACTGTATGAAGATGAAGGCTAGAATGACATTCGTGAGCTC  
ATCTAAGTTATCGAAGTTCTCTTGACCGAGGTACGTTTTTATAGTGTGGGATACAGACCATGTTTGAAAATATACTTAATTT

>PhRXLR49\_710 PLHAL7100526

GAAAAGGATAGGCTGCAGGATTGCAGAAAACAATGATTTGCGAATATTTAACTATTGTAAAGCCGGCTCCAGAATTTAAGCAAGGCC  
CTAGAGGTCTCACTTATCAACTTTCTCTTCTTATCTCACTACCATCTCCTCCGCCCTACCTTCTGCAACGATGCGCCTTCTCGTACT  
ACTACCGGCTGTGATGGCATCAACTTTCTGGCGACTAGTAGTGCCGTTGTCAATCCTGACCCCATTCATCATGCCAACTCTTTACA  
AGTAGCTTCGAAAGTTAATATTGCTGCTTTAAAGAATGGTCTCTGCTCTGAGAACCCTGGAACAGTCCCAAAGGAGAGGGCGCTT  
AGGAGATACATACTATCCCAGCGCTTACTCCTATACTGGCGGGAATAATTTATGGATTCAACAACATTTCTCCCAACAGCAACGGCTA  
TCAGAACACTTACCCTACAAGATACGGCAACCAGAAGCGAGATGACAGTGTATTCAGCAGCGAAGATAGCAAAGACGATTTCTAG  
CCACGATTAGCCGCATACCTCACCCGAGTCGATCCTGATATTAATGACTGTATGAAGATGAAGGCTAGAATGACATTCGTGAGCTC  
ATCTAAGTTATCGAAGTTCTCTTGACCGAGGTACGTTTTTATAGTGTGGGATACAGACCATGTTTGAAAATATACTTAATTT

>PhRXLR49\_304 PLHAL3040494

GAAAAGGATAGGCTGCAGGATTGCAGAAAACAATGATTTGCGAATATTTAACTATTGTAAAGCCGGCTCCAGAATTTAAGCAAGGCC  
CTAGAGGTCTCACTTATCAACTTTCTCTTCTTATCTCACTACCATCTCCTCCGCCCTACCTTCTGCAACGATGCGCCTTCTCGTACT  
ACTACCGGCTGTGATGGCATCAACACTTCTGGCGACTAGTAGTGCCGTTGTCAATCCTGACCCCATTCATCATGCCAACTCTTTACA  
AGTAGCTTCGAAAGTTAATATTGCTGCTTTAAAGAATGGTCTCGTGCTCTGAGAACCCTGGAACAGTCCCAAAGGAGAGGGCGCTT  
AGGAGATACATACTATCCCAGCGCTTACTCCTATACTGGCGGGAATAATTATGGATTCAACAACCTATTCTCCCAACAGCAACGGCTA  
TCAGAACACTTACCCTACAAGATACGGCAACCAGAAGCGAGATGACAGTGATGATTCCAGCAGCGAAGATAGCAAAGACGATTCTAG  
CCACGATTAGCCGCATACCTCACCCGAGTCGATCCTGATATTAATGACTGTATGAAGATGAAGGCTAGAATGACATTTCGTGAGCTC  
ATCTAAGTTATCGAAGTTCTCTTGACCGAGGTACGTTTTTATAGTGTTGGGATACAGACCATGTTTGAAAATATACTTAATTT

>PhRXLR49\_700 PLHAL7000084

GAAAAGGATAGGCTGCAGGATTGCAGAAAACAATGATTTGCGAATATTTAACTATTGTAAAGCCGGCTCCAGAATTTAAGCAAGGCC  
CTAGAGGTCTCACTTATCAACTTTCTCTTCTTATCTCACTACCATCTCCTCCGCCCTACCTTCTGCAACGATGCGCCTTCTCGTACT  
ACTACCGGCTGTGATGGCATCAACACTTCTGGCGACTAGTAGTGCCGTTGTCAATCCTGACCCCATTCATCATGCCAACTCTTTACA  
AGTAGCTTCGAAAGTTAATATTGCTGCTTTAAAGAATGGTCTCGTGCTCTGAGAACCCTGGAACAGTCCCAAAGGAGAGGGCGCTT  
AGGAGATACATACTATCCCAGCGCTTACTCCTATACTGGCGGGAATAATTATGGATTCAACAACCTATTCTCCCAACAGCAACGGCTA  
TCAGAACACTTACCCTACAAGATACGGCAACCAGAAGCGAGATGACAGTGATGATTCCAGCAGCGAAGATAGCAAAGACGATTCTAG  
CCACGATTAGCCGCATACCTCACCCGAGTCGATCCTGATATTAATGACTGTATGAAGATGAAGGCTAGAATGACATTTCGTGAGCTC  
ATCTAAGTTATCGAAGTTCTCTTGACCGAGGTACGTTTTTATAGTGTTGGGATACAGACCATGTTTGAAAATATACTTAATTT

>PhRXLR49\_730 PLHAL7300503

GAAAAGGATAGGCTGCAGGATTGCAGAAAACAATGATTTGCGAATATTTAACTATTGTAAAGCCGGCTCCAGAATTTAAGCAAGGCC  
CTAGAGGTCTCACTTATCAACTTTCTCTTCTTATCTCACTACCATCTCCTCCGCCCTACCTTCTGCAACGATGCGCCTTCTCGTACT  
ACTACCGGCTGTGATGGCATCAACACTTCTGGCGACTAGTAGTGCCGTTGTCAATCCTGACCCCATTCATCATGCCAACTCTTTACA  
AGTAGCTTCGAAAGTTAATATTGCTGCTTTAAAGAATGGTCTCGTGCTCTGAGAACCCTGGAACAGTCCCAAAGGAGAGGGCGCTT  
AGGAGATACATACTATCCCAGCGCTTACTCCTATACTGGCGGGAATAATTATGGATTCAACAACCTATTCTCCCAACAGCAACGGCTA  
TCAGAACACTTACCCTACAAGATACGGCAACCAGAAGCGAGATGACAGTGATGATTCCAGCAGCGAAGATAGCAAAGACGATTCTAG  
CCACGATTAGCCGCATACCTCACCCGAGTCGATCCTGATATTAATGACTGTATGAAGATGAAGGCTAGAATGACATTTCGTGAGCTC  
ATCTAAGTTATCGAAGTTCTCTTGACCGAGGTACGTTTTTATAGTGTTGGGATACAGACCATGTTTGAAAATATACTTAATTT

>PhRXLR52\_100 PLHAL100A10211

ACTTTCCAATTTCTCTCCTGAGCTCACCGCCTTCGCTTTATCTCAACTCCTCCACAATGCAATTCACCTACTCGTCATGACAACA  
ATTGCAGCTTCGTTTGCAGCGACTGGTAGTGCTCTCCCGCACACCAACGTATTACCCAAAATCGGGACTCTAAGAGGTGCAATTAAC  
AATGACGCTGCCACCTTCAATGGTTCGGGCACTGAGAAAACCCGAAAATCGCGGCTTGATTGGCGACGATTCCGACAGCAGCATCAGC  
GATTCTGATTCTGAAGCAAAGGAATACCGCGCTTACAAAATCTCATAAGGAACACTTCGGCTACCAAATGCCATAGAAAACCTGGCTAT  
GACGATAATCGCAAGTAACAAGACAAGACCTTGTACAGTTAAACAATGTAGACTTTCTAGTGTTTGTAACTTGAATAACAATTTGT  
GAGAC

>PhRXLR52\_334 PLHAL3340014

ACTTTCCAATTTCTCTCCTGAGCTCACCGCCTTCGCTTTATCTCAACTCCTCCACAATGCAATTCACCTACTCGTCATGACAACA  
ATTGCAGCTTCGTTTGCAGCGACTGGTAGTGCTCTCCCGCACACCAACGTATTACCCAAAATCGGGACTCTAAGAGGTGCAATTAAC  
AATGACGCTGCCACCTTCAATGGTTCGGGCACTGAGAAAACCCGAAAATCGCGGCTTGATTGGCGACGATTCCGACAGCAGCATCAGC  
GATTCTGATTCTGAAGCAAAGGAATACCGCGCTTACAAAATCTCATAAGGAACACTTCGGCTACCAAATGCCATAGAAAACCTGGCTAT  
GACGATAATCGCAAGTAACAAGACAAGACCTTGTACAGTTAAACAATGTAGACTTTCTAGTGTTTGTAACTTGAATAACAATTTGT  
GAGAC

>PhRXLR52\_703 PLHAL7030021

ACTTTCCAATTTCTCTCCTGAGCTCACCGCCTTCGCTTTATCTCAACTCCTCCACAATGCAATTCACCTACTCGTCATGACAACA  
ATTGCAGCTTCGTTTGCAGCGACTGGTAGTGCTCTCCCGCACACCAACGTATTACCCAAAATCGGGACTCTAAGAGGTGCAATTAAC  
AATGACGCTGCCACCTTCAATGGTTCGGGCACTGAGAAAACCCGAAAATCGCGGCTTGATTGGCGACGATTCCGACAGCAGCATCAGC  
GATTCTGATTCTGAAGCAAAGGAATACCGCGCTTACAAAATCTCATAAGGAACACTTCGGCTACCAAATGCCATAGAAAACCTGGCTAT  
GACGATAATCGCAAGTAACAAGACAAGACCTTGTACAGTTAAACAATGTAGACTTTCTAGTGTTTGTAACTTGAATAACAATTTGT  
GAGAC

>PhRXLR52\_710 PLHAL7100035

ACTTTCCAATTTCTCTCCTGAGCTCACCGCCTTCGCTTTATCTCAACTCCTCCACAATGCAATTCACCTACTCGTCATGACAACA  
ATTGCAGCTTCGTTTGCAGCGACTGGTAGTGCTCTCCCGCACACCAACGTATTACCCAAAATCGGGACTCTAAGAGGTGCAATTAAC  
AATGACGCTGCCACCTTCAATGGTTCGGGCACTGAGAAAACCCGAAAATCGCGGCTTGATTGGCGACGATTCCGACAGCAGCATCAGC  
GATTCTGATTCTGAAGCAAAGGAATACCGCGCTTACAAAATCTCATAAGGAACACTTCGGCTACCAAATGCCATAGAAAACCTGGCTAT  
GACGATAATCGCAAGTAACAAGACAAGACCTTGTACAGTTAAACAATGTAGACTTTCTAGTGTTTGTAACTTGAATAACAATTTGT  
GAGAC

>PhRXLR52\_304 PLHAL3040017

ACTTTCCAATTTCTCTCCTGAGCTCACCGCCTTCGCTTTATCTCAACTCCTCCACAATGCAATTCACCTACTCGTCATGACAACA  
ATTGCAGCTTCGTTTGCAGCGACTGGTAGTGCTCTCCCGCACACCAACGTATTACCCAAAATCGGGACTCTAAGAGGTGCAATTAAC  
AATGACGCTGCCACCTTCAATGGTTCGGGCACTGAGAAAACCCGAAAATCGCGGCTTGATTGGCGACGATTCCGACAGCAGCATCAGC  
GATTCTGATTCTGAAGCAAAGGAATACCGCGCTTACAAAATCTCATAAGGAACACTTCGGCTACCAAATGCCATAGAAAACCTGGCTAT  
GACGATAATCGCAAGTAACAAGACAAGACCTTGTACAGTTAAACAATGTAGACTTTCTAGTGTTTGTAACTTGAATAACAATTTGT  
GAGAC

>PhRXLR52\_700 PLHAL7000005

ACTTTCCAATTTCTCTCCTGAGCTCACCGCCTTCGCTTTATCTCAACTCCTCCACAATGCAATTCACCTACTCGTCATGACAACA  
ATTGCAGCTTCGTTTGCAGCGACTGGTAGTGCTCTCCCGCACACCAACGTATTACCCAAAATCGGGACTCTAAGAGGTGCAATTAAC  
AATGACGCTGCCACCTTCAATGGTTCGGGCACTGAGAAAACCCGAAAATCGCGGCTTGATTGGCGACGATTCCGACAGCAGCATCAGC  
GATTCTGATTCTGAAGCAAAGGAATACCGCGCTTACAAAATCTCATAAGGAACACTTCGGCTACCAAATGCCATAGAAAACCTGGCTAT

GACGATAATCGCAAGTAACAAGACAAGACCTTGTACAGTTAAACAATGTAGACTTTCTAGTGTTTGTAACTTGAAAATACAATTGT  
GAGAC

>PhRXLR52\_730 PLHAL7300025

ACTTTTCCAATTTCTCTCCTGAGCTCACCAGCTTCGCTTTATCTCAACTCCTCCACAATGCAATTCACCTACTCGTCATGACAACA  
ATTGACGCTTCGTTTTCAGCGACTGGTAGTGCTCTCCCGCACACCAACGTATTACCCAAAATCGGGACTCTAAGAGGTGCAATTAAC  
AATGACGCTGCCACCTTCAATGGTTCGGGCACTGAGAAAACCCGAAAATCGCGGCTTGATTGGCGACGATTCCGACAGCAGCATCAGC  
GATTCTGATTCTGAAGCAAAGGAATACCGCGCTTACAAATCTCATAAGGAACTTCGGCTACCAAATGCCATAGAAAATGGCTAT  
GACGATAATCGCAAGTAACAAGACAAGACCTTGTACAGTTAAACAATGTAGACTTTCTAGTGTTTGTAACTTGAAAATACAATTGT  
GAGAC

>PhRXLR58\_100 PLHAL100A10168

AATTTTCTTCGTCGTTCCAGGTGTGAAGTTTACTCAGTTGCCATGCGAATGAGCTCTTTCCTCCTTATACCCACGACAGCGAT  
AGTTGCTGGTTGCGGTGCCGTCTCAGCATATAGACGACCGAGACTATTGGGTTCGAAGCTGCCTGATGAAGTCATGTCAGCGAAGGA  
TGCTGTTTTAGCGAATAGTGCACGATTTCTAAGTAGCAAACCTGACAGAGTCAATGTCATTTATGCGCCAGAGAAAAGAAGAAAGAAAT  
GATGAAAGGCATGGACGACATTCTCAATCTTGTGCGAGACAGCAGCAGCCTAGAAAAGATTGTTCCACATACCACCTTCTGAATT  
AAAGAAAGACTTGGAACTTTTCGGGACATTTTCTATTGGTCCGACCCAATTAATCGCGATCGCATGATCAGTACCCTGAACTTGTGAC  
ACGAATGAAAGAGAATGTTGCGAAAGCTACAAACCAGCAAGCACCAGGCCAATTTTTTGGACTATTGCCACAAAATTCAGCTCCACA  
TCTCAATCAATATCCAGTAAGCCATGCTGTAGACCACACGCCGCAAGTCCCAAGTGGATATTCTCCTCAAAATCAGCACGTTGGCAA  
TCCTAATGGACAAATCTCTGCACAACATCAGCAAATTTGGCTCTCCGTATGCACAAGCACAACAGCA

>PhRXLR58\_334 PLHAL3340150

AATTTTCTTCGTCGTTCCAGGTGTGAAGTTTACTCAGTTGCCATGCGAATGAGCTCTTTCCTCCTTATACCCACGACAGCGAT  
AGTTGCTGGTTGCGGTGCCGTCTCAGCATATAGACGACCGAGACTATTGGGTTCGAAGCTGCCTGATGAAGTCATGTCAGCGAAGGA  
TGCTGTTTTAGCGAATAGTGCACGATTTCTAAGTAGCAAACCTGACAGAGTCAATGTCATTTATGCGCCAGAGAAAAGAAGAAAGAAAT  
GATGAAAGGCATGGACGACATTCTCAATCTTGTGCGAGACAGCAGCAGCCTAGAAAAGATTGTTCCACATACCACCTTCTGAATTA  
AAGAAAGACTTGGAACTTTTCGGGACATTTTCTATTGGTCCGACCCAATTAATCGCGATCGCATGATCAGTACCCTGAACTTGTGACA  
CGAATGAAAGAGAATGTTGCGAAAGCTACAAACCAGCAAGCACCAGGCCAATTTTTTGGACTATTGCCACAAAATTCAGCTCCACAT  
CTCAATCAATATCCAGTAAGCCATGCTGTAGACCACACGCCGCAAGTCCCAAGTGGATATTCTCCTCAAAATCAGCACGTTGGCAAT  
CCTAATGGACAAATCTCTGCACAACATCAGCAAATTTGGCTCTCCGTATGGACAAGCACAACAGCA

>PhRXLR58\_703 PLHAL7030202

AATTTTCTTCGTCGTTCCAGGTGTGAAGTTTACTCAGTTGCCATGCGAATGAGCTCTTTCCTCCTTATACCCACGACAGCGAT  
AGTTGCTGGTTGCGGTGCCGTCTCAGCATATAGACGACCGAGACTATTGGGTTCGAAGCTGCCTGATGAAGTCATGTCAGCGAAGGA  
TGCTGTTTTAGCGAATAGTGCACGATTTCTAAGTAGCAAACCTGACAGAGTCAATGTCATTTATGCGCCAGAGAAAAGAAGAAAGAAAT  
GATGAAAGGCATGGACGACATTCTCAATCTTGTGCGAGACAGCAGCAGCCTAGAAAAGATTGTTCCACATACCACCTTCTGAATT  
AAAGAAAGACTTGGAACTTTTCGGGACATTTTCTATTGGTCCGACCCAATTAATCGCGATCGCATGATCAGTACCCTGAACTTGTGACA  
ACGAATGAAAGAGAATGTTGCGAAAGCTACAAACCAGCAAGCACCAGGCCAATTTTTTGGACTATTGCCACAAAATTCAGCTCCACA  
TCTCAATCAATATCCAGTAAGCCATGCTGTAGACCACACGCCGCAAGTCCCAAGTGGATATTCTCCTCAAAATCAGCACGTTGGCAA  
TCCTAATGGACAAATCTCTGCACAACATCAGCAAATTTGGCTCTCCGTATGGACAAGCACAACAGCA

>PhRXLR58\_710 PLHAL7100249

AATTTTCTTCGTCGTTCCAGGTGTGAAGTTTACTCAGTTGCCATGCGAATGAGCTCTTTCCTCCTTATACCCACGACAGCGAT  
AGTTGCTGGTTGCGGTGCCGTCTCAGCATATAGACGACCGAGACTATTGGGTTCGAAGCTGCCTGATGAAGTCATGTCAGCGAAGGA  
TGCTGTTTTAGCGAATAGTGCACGATTTCTAAGTAGCAAACCTGACAGAGTCAATGTCATTTATGCGCCAGAGAAAAGAAGAAAGAAAT  
GATGAAAGGCATGGACGACATTCTCAATCTTGTGCGAGACAGCAGCAGCCTAGAAAAGATTGTTCCACATACCACCTTCTGAATT  
AAAGAAAGACTTGGAACTTTTCGGGACATTTTCTATTGGTCCGACCCAATTAATCGCGATCGCATGATCAGTACCCTGAACTTGTGACA  
ACGAATGAAAGAGAATGTTGCGAAAGCTACAAACCAGCAAGCACCAGGCCAATTTTTTGGACTATTGCCACAAAATTCAGCTCCACAT  
CTCAATCAATATCCAGTAAGCCATGCTGTAGACCACACGCCGCAAGTCCCAAGTGGATATTCTCCTCAAAATCAGCACGTTGGCAAT  
CCTAATGGACAAATCTCTGCACAACATCAGCAAATTTGGCTCTCCGTATGGACAAGCACAACAGCA

>PhRXLR58\_304 PLHAL3040169

AATTTTCTTCGTCGTTCCAGGTGTGAAGTTTACTCAGTTGCCATGCGAATGAGCTCTTTCCTCCTTATACCCACGACAGCGAT  
AGTTGCTGGTTGCGGTGCCGTCTCAGCATATAGACGACCGAGACTATTGGGTTCGAAGCTGCCTGATGAAGTCATGTCAGCGAAGGA  
TGCTGTTTTAGCGAATAGTGCACGATTTCTAAGTAGCAAACCTGACAGAGTCAATGTCATTTATGCGCCAGAGAAAAGAAGAAAGAAAT  
GATGAAAGGCATGGACGACATTCTCAATCTTGTGCGAGACAGCAGCAGCCTAGAAAAGATTGTTCCACATACCACCTTCTGAATT  
AAAGAAAGACTTGGAACTTTTCGGGACATTTTCTATTGGTCCGACCCAATTAATCGCGATCGCATGATCAGTACCCTGAACTTGTGACA  
ACGAATGAAAGAGAATGTTGCGAAAGCTACAAACCAGCAAGCACCAGGCCAATTTTTTGGACTATTGCCACAAAATTCAGCTCCACA  
TCTCAATCAATATCCAGTAAGCCATGCTGTAGACCACACGCCGCAAGTCCCAAGTGGATATTCTCCTCAAAATCAGCACGTTGGCAA  
TCCTAATGGACAAATCTCTGCACAACATCAGCAAATTTGGCTCTCCGTATGGACAAGCACAACAGCA

>PhRXLR58\_700 PLHAL7000103

AATTTTCTTCGTCGTTCCAGGTGTGAAGTTTACTCAGTTGCCATGCGAATGAGCTCTTTCCTCCTTATACCCACGACAGCGAT  
AGTTGCTGGTTGCGGTGCCGTCTCAGCATATAGACGACCGAGACTATTGGGTTCGAAGCTGCCTGATGAAGTCATGTCAGCGAAGGA  
TGCTGTTTTAGCGAATAGTGCACGATTTCTAAGTAGCAAACCTGACAGAGTCAATGTCATTTATGCGCCAGAGAAAAGAAGAAAGAAAT  
GATGAAAGGCATGGACGACATTCTCAATCTTGTGCGAGACAGCAGCAGCCTAGAAAAGATTGTTCCACATACCACCTTCTGAATT  
AAAGAAAGACTTGGAACTTTTCGGGACATTTTCTATTGGTCCGACCCAATTAATCGCGATCGCATGATCAGTACCCTGAACTTGTGACA  
ACGAATGAAAGAGAATGTTGCGAAAGCTACAAACCAGCAAGCACCAGGCCAATTTTTTGGACTATTGCCACAAAATTCAGCTCCACA  
TCTCAATCAATATCCAGTAAGCCATGCTGTAGACCACACGCCGCAAGTCCCAAGTGGATATTCTCCTCAAAATCAGCACGTTGGCAA  
TCCTAATGGACAAATCTCTGCACAACATCAGCAAATTTGGCTCTCCGTATGGACAAGCACAACAGCA

>PhRXLR58\_730 PLHAL7300320

AATTTTCTTCGTCGTTCCAGGTGTGAAGTTTACTCAGTTGCCATGCGAATGAGCTCTTTCCTCCTTATACCCACGACAGCGAT  
AGTTGCTGGTTGCGGTGCCGTCTCAGCATATAGACGACCGAGACTATTGGGTTCGAAGCTGCCTGATGAAGTCATGTCAGCGAAGGA



TGCTGTTTCAGCGAATAGTGCACGATTTCTAAGTAGCAAACCTGACAGAGTCAATGTCATTTATGCGCCAGAGAAAGAAGAAAGAAT  
GATGAAAGGCATGGACGACATTCTCAATCTTGTGCGAGACAGCAGCAGCCTAGAAAAGATTGTTCCCTCACATACCACCTTCTGAATT  
AAAGAAAGACTTGGAAACTTTCGGGACATTTTCTATTGGTCCGACCCAATTATCGCGATCGCATGATCAGTACCCTGAACTTGTGAC  
ACGAATGAAAGAGAATGTTGCGAAAGCTACAAACCAGCAAGCACCAGCCAATTTTTTGGACTATTGCCACAAAATTCAGCTCCACA  
TCTCAATCAATATCCAGTAAGCCATGCTGTAGACCACACGCCGCAAGTCCCAAGTGGATATTCTCCTCAAAATCAGCACGTTGGCAA  
TCCTAATGGACAAAATCTCTGCACAACATCAGCAAATGGCTCTCCGTATGGACAAGCACAAACAGCA
